# Supplementary material for: Can an ancillary ligand lead to a thermodynamically stable end-on 1 : 1 Cu–O2adduct supported by a β-diketiminate ligand?
Source: Royal Society of Chemistry journal article supplement (doi:10.1039/b608980a), 2006-01-01
Supplement: b608980a.pdf [file b608980a.pdf]

**Supporting Information for**

Can an Ancillary Ligand Lead to a Thermodynamically Stable End-on 1:1 Cu-O<sub>2</sub>  
Adduct Supported by a β-Diketiminato Ligand?

David E. Heppner, Benjamin F. Gherman, William B. Tolman, Christopher J. Cramer\*

*Department of Chemistry and Supercomputer Institute,*

*University of Minnesota,*

*207 Pleasant St. SE*

*Minneapolis, MN 55455*

*Received June 00, 2006*

**Table S1.** Singlet-triplet free energy differences ( $^1A - ^3A$ , kcal/mol) for all  $L^1CuXO_2$  complexes.

|                       | $^1A - ^3A$ |                       | $^1A - ^3A$ |
|-----------------------|-------------|-----------------------|-------------|
| $\eta^1 L^1Cu(1)O_2$  | -5.6        | $\eta^1 L^1Cu(12)O_2$ | -11.0       |
| $\eta^2 L^1Cu(1)O_2$  | n/a *       | $\eta^2 L^1Cu(12)O_2$ | n/a **      |
| $\eta^1 L^1Cu(2)O_2$  | -9.1        | $\eta^1 L^1Cu(13)O_2$ | -8.7        |
| $\eta^2 L^1Cu(2)O_2$  | n/a *       | $\eta^2 L^1Cu(13)O_2$ | -0.7        |
| $\eta^1 L^1Cu(3)O_2$  | -4.9        | $\eta^1 L^1Cu(14)O_2$ | -9.0        |
| $\eta^2 L^1Cu(3)O_2$  | n/a *       | $\eta^2 L^1Cu(14)O_2$ | 0.9         |
| $\eta^1 L^1Cu(4)O_2$  | -4.8        | $\eta^1 L^1Cu(15)O_2$ | -11.6       |
| $\eta^2 L^1Cu(4)O_2$  | n/a *       | $\eta^2 L^1Cu(15)O_2$ | n/a **      |
| $\eta^1 L^1Cu(5)O_2$  | -4.1        | $\eta^1 L^1Cu(16)O_2$ | -10.0       |
| $\eta^2 L^1Cu(5)O_2$  | -6.4        | $\eta^2 L^1Cu(16)O_2$ | n/a **      |
| $\eta^1 L^1Cu(6)O_2$  | -3.6        | $\eta^1 L^1Cu(17)O_2$ | -10.0       |
| $\eta^2 L^1Cu(6)O_2$  | -5.6        | $\eta^2 L^1Cu(17)O_2$ | n/a **      |
| $\eta^1 L^1Cu(7)O_2$  | -4.9        | $\eta^1 L^1Cu(18)O_2$ | -4.4        |
| $\eta^2 L^1Cu(7)O_2$  | 1.2         | $\eta^2 L^1Cu(18)O_2$ | -2.3        |
| $\eta^1 L^1Cu(8)O_2$  | -0.8        | $\eta^1 L^1Cu(19)O_2$ | -15.6       |
| $\eta^2 L^1Cu(8)O_2$  | n/a *       | $\eta^2 L^1Cu(19)O_2$ | -1.1        |
| $\eta^1 L^1Cu(9)O_2$  | -12.1       | $\eta^1 L^1Cu(20)O_2$ | -4.9        |
| $\eta^2 L^1Cu(9)O_2$  | n/a *       | $\eta^2 L^1Cu(20)O_2$ | -0.2        |
| $\eta^1 L^1Cu(10)O_2$ | -7.2        | $\eta^1 L^1Cu(21)O_2$ | -10.8       |
| $\eta^2 L^1Cu(10)O_2$ | n/a *       | $\eta^2 L^1Cu(21)O_2$ | n/a *       |
| $\eta^1 L^1Cu(11)O_2$ | -3.7        | $\eta^1 L^1Cu(22)O_2$ | -4.1        |
| $\eta^2 L^1Cu(11)O_2$ | -2.9        | $\eta^2 L^1Cu(22)O_2$ | n/a *       |

\* No stable  $\eta^2 LCuXO_2$  geometries (singlet or triplet) could be obtained in these cases.

\*\* No stable triplet  $\eta^2 LCuXO_2$  geometries could be obtained in these cases.

**Atomic Coordinates for Computed Structures.**

1. L<sup>1</sup>CuX, X = THF

|    |          |          |          |
|----|----------|----------|----------|
| Cu | 0.40609  | -0.12351 | 0.48585  |
| N  | 1.72372  | 1.31699  | 0.72389  |
| N  | -1.29421 | 0.87073  | 0.49141  |
| C  | 2.30027  | 3.68877  | 1.00968  |
| C  | 1.28595  | 2.57172  | 0.82298  |
| C  | -0.07368 | 2.95730  | 0.77118  |
| C  | -1.25645 | 2.19584  | 0.62322  |
| C  | -2.56458 | 2.97088  | 0.61666  |
| C  | 3.10393  | 0.97855  | 0.80093  |
| C  | 3.68234  | 0.66309  | 2.05628  |
| C  | 4.99863  | 0.19156  | 2.09199  |
| C  | 5.74418  | 0.03273  | 0.92614  |
| C  | 5.17003  | 0.35222  | -0.30191 |
| C  | 3.85648  | 0.82756  | -0.39046 |
| C  | 2.86978  | 0.76975  | 3.34344  |
| C  | 3.63906  | 1.44674  | 4.48900  |
| C  | 2.35231  | -0.61470 | 3.77829  |
| C  | 3.24165  | 1.12643  | -1.75526 |
| C  | 2.90196  | -0.17683 | -2.50450 |
| C  | 4.12753  | 2.03688  | -2.62136 |
| C  | -2.51209 | 0.14994  | 0.34455  |
| C  | -3.16157 | -0.37187 | 1.49124  |
| C  | -4.27363 | -1.20183 | 1.31631  |
| C  | -4.75105 | -1.51626 | 0.04620  |
| C  | -4.11111 | -0.99247 | -1.07466 |
| C  | -2.99442 | -0.15763 | -0.95219 |
| C  | -2.62457 | -0.08997 | 2.89127  |
| C  | -1.78652 | -1.27774 | 3.40476  |
| C  | -3.72682 | 0.27401  | 3.89942  |
| C  | -2.28264 | 0.35953  | -2.19927 |
| C  | -3.24639 | 0.98097  | -3.22593 |
| C  | -1.43475 | -0.75304 | -2.85004 |
| H  | 1.81811  | 4.66755  | 1.01496  |
| H  | 3.05115  | 3.67260  | 0.21280  |
| H  | 2.84401  | 3.56604  | 1.95321  |
| H  | -0.23858 | 4.02375  | 0.86451  |
| H  | -2.39367 | 4.04320  | 0.72482  |
| H  | -3.21813 | 2.63932  | 1.43074  |
| H  | -3.11482 | 2.79818  | -0.31443 |
| H  | 5.44829  | -0.06019 | 3.04843  |
| H  | 6.76542  | -0.33417 | 0.97494  |
| H  | 5.75222  | 0.22762  | -1.21084 |
| H  | 1.99134  | 1.38349  | 3.12858  |
| H  | 2.98203  | 1.58915  | 5.35378  |
| H  | 4.02203  | 2.42676  | 4.18802  |
| H  | 4.49088  | 0.84548  | 4.82379  |
| H  | 1.73993  | -0.53661 | 4.68384  |
| H  | 3.18382  | -1.29671 | 3.98851  |
| H  | 1.73574  | -1.06207 | 2.99270  |
| H  | 2.29899  | 1.65211  | -1.58196 |
| H  | 2.43468  | 0.04077  | -3.47182 |
| H  | 2.20505  | -0.79113 | -1.92624 |
| H  | 3.80437  | -0.77061 | -2.69134 |
| H  | 3.61097  | 2.29514  | -3.55227 |
| H  | 5.06991  | 1.55036  | -2.89430 |
| H  | 4.37274  | 2.96765  | -2.10059 |
| H  | -4.77431 | -1.61270 | 2.18860  |
| H  | -5.61678 | -2.16213 | -0.06899 |
| H  | -4.48483 | -1.23890 | -2.06453 |

|   |          |          |          |
|---|----------|----------|----------|
| H | -1.94961 | 0.76666  | 2.81649  |
| H | -1.36793 | -1.06254 | 4.39403  |
| H | -0.95389 | -1.48794 | 2.72639  |
| H | -2.39745 | -2.18375 | 3.48541  |
| H | -3.28145 | 0.57100  | 4.85481  |
| H | -4.39446 | -0.57017 | 4.10180  |
| H | -4.34141 | 1.10494  | 3.53761  |
| H | -1.59003 | 1.14367  | -1.87949 |
| H | -2.68227 | 1.42467  | -4.05347 |
| H | -3.86030 | 1.76758  | -2.77309 |
| H | -3.92505 | 0.23562  | -3.65722 |
| H | -0.89268 | -0.37037 | -3.72258 |
| H | -2.06741 | -1.58482 | -3.18407 |
| H | -0.69698 | -1.14851 | -2.14347 |
| C | 1.96117  | -2.83984 | 0.40364  |
| O | 0.71214  | -2.15148 | 0.18019  |
| C | -0.31372 | -3.16698 | 0.17530  |
| C | 1.84355  | -4.13742 | -0.41302 |
| C | 0.31174  | -4.33921 | -0.59313 |
| H | 2.06810  | -3.04403 | 1.47670  |
| H | 2.76210  | -2.17099 | 0.08787  |
| H | -1.19824 | -2.73289 | -0.28934 |
| H | -0.55069 | -3.43900 | 1.21159  |
| H | 2.31653  | -4.97459 | 0.10620  |
| H | 2.33368  | -4.02789 | -1.38333 |
| H | 0.04100  | -4.29037 | -1.65056 |
| H | -0.03431 | -5.30008 | -0.20405 |

2.  $L^1CuXO_2$   $\eta^1$  singlet, X = THF

|    |          |          |          |
|----|----------|----------|----------|
| Cu | -0.47998 | -0.13310 | 0.82100  |
| N  | -0.56116 | 0.12972  | -1.14084 |
| N  | -0.20271 | -2.08194 | 0.91146  |
| C  | -1.11024 | -0.75551 | -3.36836 |
| C  | -0.84446 | -0.93892 | -1.88386 |
| C  | -0.91011 | -2.26706 | -1.39987 |
| C  | -0.55033 | -2.81101 | -0.14623 |
| C  | -0.56427 | -4.32457 | -0.03293 |
| C  | -0.30851 | 1.41307  | -1.72603 |
| C  | -1.33990 | 2.37375  | -1.86979 |
| C  | -1.01699 | 3.62592  | -2.40746 |
| C  | 0.27987  | 3.94563  | -2.79089 |
| C  | 1.28697  | 2.99945  | -2.63632 |
| C  | 1.02306  | 1.73224  | -2.10464 |
| C  | -2.78426 | 2.10488  | -1.46186 |
| C  | -3.73586 | 2.13170  | -2.67274 |
| C  | -3.26521 | 3.10788  | -0.39769 |
| C  | 2.18155  | 0.74802  | -1.95400 |
| C  | 3.25857  | 1.28790  | -0.99456 |
| C  | 2.80457  | 0.38845  | -3.31635 |
| C  | 0.31238  | -2.66300 | 2.11053  |
| C  | -0.53852 | -2.80498 | 3.23702  |
| C  | 0.00534  | -3.29958 | 4.42868  |
| C  | 1.35187  | -3.63539 | 4.53021  |
| C  | 2.18151  | -3.47232 | 3.42409  |
| C  | 1.68884  | -2.99168 | 2.20521  |
| C  | -2.01232 | -2.41063 | 3.20051  |
| C  | -2.32267 | -1.28723 | 4.20882  |
| C  | -2.93380 | -3.62176 | 3.43819  |
| C  | 2.65439  | -2.79663 | 1.03925  |
| C  | 3.39617  | -4.09380 | 0.66839  |
| C  | 3.65979  | -1.66918 | 1.33982  |
| C  | 0.86230  | 2.48847  | 1.88585  |
| O  | 1.02411  | 1.05545  | 1.97804  |
| C  | 1.24831  | 0.78712  | 3.37805  |

|   |          |          |          |
|---|----------|----------|----------|
| C | 1.92015  | 3.06350  | 2.83968  |
| C | 2.18625  | 1.90954  | 3.84557  |
| H | -1.26279 | -1.71564 | -3.86299 |
| H | -0.27840 | -0.23910 | -3.85474 |
| H | -1.99870 | -0.13706 | -3.52522 |
| H | -1.20223 | -2.99991 | -2.14136 |
| H | -0.94843 | -4.78581 | -0.94413 |
| H | -1.18517 | -4.63964 | 0.81181  |
| H | 0.44156  | -4.71336 | 0.15355  |
| H | -1.80253 | 4.36621  | -2.52345 |
| H | 0.50425  | 4.92445  | -3.20427 |
| H | 2.30184  | 3.24738  | -2.93319 |
| H | -2.83118 | 1.11126  | -1.01143 |
| H | -4.75902 | 1.90509  | -2.35361 |
| H | -3.45144 | 1.40172  | -3.43690 |
| H | -3.74712 | 3.11923  | -3.14944 |
| H | -4.26376 | 2.83251  | -0.04812 |
| H | -3.31645 | 4.12539  | -0.80140 |
| H | -2.59648 | 3.10497  | 0.46410  |
| H | 1.78735  | -0.17366 | -1.51824 |
| H | 4.09028  | 0.57937  | -0.91538 |
| H | 2.85072  | 1.43840  | 0.00856  |
| H | 3.66663  | 2.24163  | -1.34682 |
| H | 3.58652  | -0.36843 | -3.18945 |
| H | 3.26111  | 1.26361  | -3.79188 |
| H | 2.05830  | -0.01213 | -4.00989 |
| H | -0.64072 | -3.41703 | 5.29441  |
| H | 1.75361  | -4.01574 | 5.46509  |
| H | 3.23568  | -3.72187 | 3.50726  |
| H | -2.23649 | -2.01477 | 2.20656  |
| H | -3.37139 | -0.98613 | 4.12647  |
| H | -1.71184 | -0.40196 | 4.01206  |
| H | -2.13891 | -1.60909 | 5.24117  |
| H | -3.98342 | -3.32204 | 3.34329  |
| H | -2.79502 | -4.04283 | 4.44249  |
| H | -2.74344 | -4.42271 | 2.71383  |
| H | 2.07117  | -2.48592 | 0.16846  |
| H | 4.02011  | -3.93533 | -0.21747 |
| H | 2.70164  | -4.91037 | 0.45001  |
| H | 4.05333  | -4.42828 | 1.47791  |
| H | 4.34342  | -1.52747 | 0.49584  |
| H | 4.26482  | -1.90309 | 2.22278  |
| H | 3.14388  | -0.72190 | 1.51879  |
| H | -0.15565 | 2.75119  | 2.19727  |
| H | 0.99610  | 2.76258  | 0.83860  |
| H | 1.66328  | -0.21736 | 3.45790  |
| H | 0.28700  | 0.82316  | 3.90627  |
| H | 1.56062  | 3.97233  | 3.32848  |
| H | 2.83292  | 3.31710  | 2.29558  |
| H | 3.22815  | 1.58609  | 3.79457  |
| H | 1.97683  | 2.19694  | 4.87921  |
| O | -3.02293 | 0.43991  | 1.47082  |
| O | -1.86802 | 1.00521  | 1.53313  |

3.  $L^1CuXO_2$   $\eta^1$  triplet, X = THF

|    |               |               |               |
|----|---------------|---------------|---------------|
| Cu | -.4633119138  | -.0803750419  | .8114780982   |
| N  | -.5053993723  | .1443929458   | -1.1687234015 |
| N  | -.2241600312  | -2.0615068395 | .9563827126   |
| C  | -1.0393338739 | -.7823972764  | -3.3857799993 |
| C  | -.8000621546  | -.9351467372  | -1.8926918213 |
| C  | -.8956043037  | -2.2493647708 | -1.3761845406 |
| C  | -.5553588538  | -2.7863676778 | -.1099389810  |
| C  | -.5323281660  | -4.3031466486 | -.0205834408  |

|   |               |               |               |
|---|---------------|---------------|---------------|
| C | - .2375196317 | 1.4072728492  | -1.7855093383 |
| C | -1.2541256749 | 2.3878104196  | -1.9043754295 |
| C | - .9309067038 | 3.6335518414  | -2.4544444286 |
| C | .3604549841   | 3.9321647233  | -2.8761818780 |
| C | 1.3579416123  | 2.9725990971  | -2.7356549611 |
| C | 1.0892534814  | 1.7115606560  | -2.1908262127 |
| C | -2.6803312049 | 2.1431655121  | -1.4233245775 |
| C | -3.7049843305 | 2.2403321176  | -2.5689099653 |
| C | -3.0565404171 | 3.1175662191  | - .2901379832 |
| C | 2.2405685950  | .7206773278   | -2.0308760643 |
| C | 3.3072617804  | 1.2658272799  | -1.0631137733 |
| C | 2.8775625446  | .3469523390   | -3.3813070004 |
| C | .2915316119   | -2.6620395126 | 2.1462432374  |
| C | - .5493531421 | -2.8386423263 | 3.2736167332  |
| C | .0042616247   | -3.3369694056 | 4.4582015664  |
| C | 1.3560567084  | -3.6507909417 | 4.5547960224  |
| C | 2.1772728089  | -3.4634374459 | 3.4471985925  |
| C | 1.6739168232  | -2.9729468077 | 2.2366693771  |
| C | -2.0357111631 | -2.5022644550 | 3.2323605134  |
| C | -2.4142567093 | -1.4652284815 | 4.3058379266  |
| C | -2.9089769876 | -3.7629230867 | 3.3710573356  |
| C | 2.6387705229  | -2.7477050189 | 1.0745392724  |
| C | 3.4126796469  | -4.0237896296 | .6968826969   |
| C | 3.6188245258  | -1.6007540082 | 1.3874432591  |
| C | .7784362222   | 2.6340919254  | 1.8510378188  |
| O | .8043753539   | 1.1994500149  | 2.0055861771  |
| C | 1.1318767156  | .9524263228   | 3.3881061038  |
| C | 1.9436393047  | 3.1473658366  | 2.7174719928  |
| C | 2.2267368593  | 1.9805644825  | 3.7053516512  |
| H | -1.2527923034 | -1.7441867904 | -3.8547359386 |
| H | - .1689002344 | - .3394752726 | -3.8795666227 |
| H | -1.8810755490 | - .1076610166 | -3.5733076164 |
| H | -1.1832366816 | -2.9938792986 | -2.1084091811 |
| H | -1.1316568388 | -4.7495061495 | - .8166248537 |
| H | - .9052166956 | -4.6517282399 | .9455357034   |
| H | .4929361070   | -4.6771856785 | - .1228214614 |
| H | -1.7090339948 | 4.3858375280  | -2.5505190554 |
| H | .5888719525   | 4.9043611521  | -3.3033644682 |
| H | 2.3708367097  | 3.2063056355  | -3.0523972131 |
| H | -2.7274879594 | 1.1292241826  | -1.0180173500 |
| H | -4.7110791533 | 2.0104534702  | -2.2020048643 |
| H | -3.4737458263 | 1.5428454535  | -3.3798973698 |
| H | -3.7301698862 | 3.2481188831  | -2.9979279587 |
| H | -4.0493244773 | 2.8806786128  | .1065887797   |
| H | -3.0738983795 | 4.1536528446  | - .6459085085 |
| H | -2.3427334978 | 3.0572649631  | .5359866996   |
| H | 1.8367059500  | - .1936636887 | -1.5896958802 |
| H | 4.1289064115  | .5508256252   | - .9500660963 |
| H | 2.8784161926  | 1.4441527001  | - .0730796468 |
| H | 3.7329689164  | 2.2075866539  | -1.4253750579 |
| H | 3.6670622173  | - .3993054068 | -3.2394725462 |
| H | 3.3283655061  | 1.2186271157  | -3.8675956407 |
| H | 2.1392931636  | - .0716710619 | -4.0716215746 |
| H | - .6388262352 | -3.4798306886 | 5.3221924935  |
| H | 1.7664057531  | -4.0352038859 | 5.4840803493  |
| H | 3.2355265611  | -3.6979315226 | 3.5232869776  |
| H | -2.2486629145 | -2.0608593397 | 2.2566658550  |
| H | -3.4650706237 | -1.1762480988 | 4.2022977973  |
| H | -1.8085391103 | - .5594831609 | 4.2117991470  |
| H | -2.2729609555 | -1.8614695588 | 5.3173141369  |
| H | -3.9706375945 | -3.5023519914 | 3.3032109142  |
| H | -2.7462644045 | -4.2567097257 | 4.3356221397  |
| H | -2.6892647255 | -4.4906798267 | 2.5839280615  |
| H | 2.0528580781  | -2.4439165526 | .2037281511   |

|   |               |               |              |
|---|---------------|---------------|--------------|
| H | 4.0284034175  | -3.8472522134 | -.1916044333 |
| H | 2.7368613103  | -4.8569086880 | .4809818209  |
| H | 4.0824649280  | -4.3434351503 | 1.5022589776 |
| H | 4.3102057523  | -1.4448393495 | .5527323248  |
| H | 4.2161841147  | -1.8220787825 | 2.2784865984 |
| H | 3.0836485178  | -.6631938936  | 1.5593697082 |
| H | -.1882901798  | 3.0139726590  | 2.2076387480 |
| H | .8766336277   | 2.8474477384  | .7856821782  |
| H | 1.4441079677  | -.0892190422  | 3.4708383834 |
| H | .2370385017   | 1.1111353216  | 4.0054044462 |
| H | 1.6730491623  | 4.0725917916  | 3.2318817645 |
| H | 2.8220838982  | 3.3554819539  | 2.1025396580 |
| H | 3.2143900812  | 1.5513538306  | 3.5191563885 |
| H | 2.1916615050  | 2.2951215815  | 4.7511850967 |
| O | -3.2680772717 | .2227559807   | 1.4295668825 |
| O | -2.1461847741 | .6880295506   | 1.7314163743 |

#### 4. L<sup>1</sup>CuX, X = MeCN

|    |          |          |          |
|----|----------|----------|----------|
| Cu | -0.08477 | 0.18592  | -0.11876 |
| N  | 1.45949  | 1.39542  | -0.33168 |
| N  | -1.55584 | 1.50332  | -0.26162 |
| N  | -0.18415 | -1.72360 | 0.17370  |
| C  | -0.24831 | -2.86839 | 0.35167  |
| C  | -0.33045 | -4.30426 | 0.57719  |
| C  | 2.48844  | 3.59975  | -0.69169 |
| C  | 1.27481  | 2.70123  | -0.52058 |
| C  | 0.01177  | 3.33143  | -0.57149 |
| C  | -1.28924 | 2.79500  | -0.44638 |
| C  | -2.44147 | 3.78151  | -0.53763 |
| C  | 2.76320  | 0.81834  | -0.29436 |
| C  | 3.40871  | 0.62064  | 0.95056  |
| C  | 4.63412  | -0.05445 | 0.97443  |
| C  | 5.22228  | -0.52981 | -0.19438 |
| C  | 4.57721  | -0.33446 | -1.41341 |
| C  | 3.35056  | 0.33374  | -1.48920 |
| C  | 2.76642  | 1.07802  | 2.25703  |
| C  | 3.72465  | 1.89627  | 3.13931  |
| C  | 2.19749  | -0.12350 | 3.03694  |
| C  | 2.63180  | 0.47021  | -2.82836 |
| C  | 1.92623  | -0.84912 | -3.19969 |
| C  | 3.55275  | 0.93324  | -3.96878 |
| C  | -2.89049 | 1.02255  | -0.11627 |
| C  | -3.46653 | 0.92602  | 1.17457  |
| C  | -4.72858 | 0.33718  | 1.30686  |
| C  | -5.42053 | -0.15127 | 0.20132  |
| C  | -4.84427 | -0.05491 | -1.06255 |
| C  | -3.58422 | 0.52503  | -1.24633 |
| C  | -2.70682 | 1.38813  | 2.41478  |
| C  | -2.11637 | 0.18175  | 3.17121  |
| C  | -3.55872 | 2.25629  | 3.35577  |
| C  | -2.96159 | 0.56554  | -2.63890 |
| C  | -3.89675 | 1.18526  | -3.69116 |
| C  | -2.50224 | -0.83925 | -3.07555 |
| H  | -1.31173 | -4.67764 | 0.27093  |
| H  | -0.18421 | -4.52037 | 1.63925  |
| H  | 0.44393  | -4.81913 | 0.00161  |
| H  | 2.19475  | 4.64071  | -0.83406 |
| H  | 3.08850  | 3.28606  | -1.55220 |
| H  | 3.14431  | 3.53884  | 0.18302  |
| H  | 0.04666  | 4.40271  | -0.72703 |
| H  | -2.08175 | 4.79749  | -0.70650 |
| H  | -3.03754 | 3.77184  | 0.38077  |
| H  | -3.12157 | 3.51170  | -1.35227 |

|   |          |          |          |
|---|----------|----------|----------|
| H | 5.13383  | -0.21542 | 1.92592  |
| H | 6.17491  | -1.05058 | -0.15611 |
| H | 5.03345  | -0.71443 | -2.32312 |
| H | 1.92215  | 1.72297  | 1.99945  |
| H | 3.19988  | 2.27108  | 4.02492  |
| H | 4.13100  | 2.75598  | 2.59696  |
| H | 4.57056  | 1.29536  | 3.49045  |
| H | 1.69746  | 0.20900  | 3.95391  |
| H | 2.99322  | -0.82224 | 3.31987  |
| H | 1.46848  | -0.67041 | 2.43102  |
| H | 1.85189  | 1.22700  | -2.70758 |
| H | 1.36555  | -0.74219 | -4.13550 |
| H | 1.22507  | -1.15073 | -2.41573 |
| H | 2.65477  | -1.65781 | -3.33056 |
| H | 2.96731  | 1.11563  | -4.87643 |
| H | 4.30996  | 0.18158  | -4.21694 |
| H | 4.07555  | 1.85961  | -3.71012 |
| H | -5.17487 | 0.25239  | 2.29395  |
| H | -6.40030 | -0.60414 | 0.32433  |
| H | -5.38100 | -0.44339 | -1.92394 |
| H | -1.86417 | 1.99725  | 2.07688  |
| H | -1.52933 | 0.51289  | 4.03566  |
| H | -1.46116 | -0.40385 | 2.51924  |
| H | -2.91071 | -0.48053 | 3.53455  |
| H | -2.94436 | 2.63841  | 4.17830  |
| H | -4.38391 | 1.69022  | 3.80134  |
| H | -3.99030 | 3.11312  | 2.82858  |
| H | -2.06799 | 1.19255  | -2.58055 |
| H | -3.38354 | 1.26709  | -4.65556 |
| H | -4.22274 | 2.18730  | -3.39448 |
| H | -4.79429 | 0.57730  | -3.84855 |
| H | -2.01677 | -0.80222 | -4.05753 |
| H | -3.35166 | -1.52867 | -3.14426 |
| H | -1.78769 | -1.25498 | -2.35852 |

5.  $L^1CuXO_2$   $\eta^1$  singlet, X = MeCN

|   |          |          |          |
|---|----------|----------|----------|
| C | 0.67615  | -2.76549 | -0.78365 |
| C | 1.51519  | -3.94156 | -0.59001 |
| C | 3.27243  | 0.96759  | 1.37558  |
| C | 4.56842  | 0.45342  | 1.23572  |
| C | 5.06777  | 0.06380  | -0.00001 |
| C | 4.26487  | 0.16739  | -1.13459 |
| C | 2.96186  | 0.66250  | -1.05884 |
| C | 2.79543  | 1.39474  | 2.76242  |
| C | 3.57301  | 2.63001  | 3.26477  |
| C | 2.90666  | 0.26030  | 3.80168  |
| C | 2.10747  | 0.77419  | -2.32143 |
| C | 2.32745  | -0.38219 | -3.31155 |
| C | 2.33184  | 2.12174  | -3.03974 |
| C | -3.06886 | 0.64512  | -0.32151 |
| C | -3.82247 | -0.00925 | 0.68555  |
| C | -4.97564 | -0.71046 | 0.31406  |
| C | -5.38110 | -0.78469 | -1.01401 |
| C | -4.62288 | -0.15723 | -1.99788 |
| C | -3.46370 | 0.55900  | -1.68315 |
| C | -3.41222 | 0.02005  | 2.15574  |
| C | -3.09209 | -1.39558 | 2.67607  |
| C | -4.47450 | 0.70449  | 3.03671  |
| C | -2.63599 | 1.15980  | -2.81851 |
| C | -3.46222 | 2.08085  | -3.73673 |
| C | -1.95411 | 0.04790  | -3.64188 |
| C | 1.86796  | 3.93937  | 0.21300  |
| C | 0.79194  | 2.86423  | 0.21616  |



S9

|    |          |          |          |
|----|----------|----------|----------|
| C  | -0.53671 | 3.33852  | 0.17564  |
| C  | -1.75530 | 2.63990  | 0.04573  |
| C  | -3.00518 | 3.48883  | -0.10607 |
| C  | 2.47220  | 1.09590  | 0.20791  |
| H  | 2.27709  | -3.99507 | -1.37250 |
| H  | 0.90610  | -4.84893 | -0.62440 |
| H  | 2.00298  | -3.86728 | 0.38383  |
| H  | 1.56410  | 4.78316  | -0.41122 |
| H  | 2.82545  | 3.55702  | -0.14207 |
| H  | 2.01502  | 4.31869  | 1.22989  |
| H  | -0.62807 | 4.41838  | 0.18238  |
| H  | -2.83724 | 4.49320  | 0.28743  |
| H  | -3.85154 | 3.03677  | 0.41698  |
| H  | -3.28951 | 3.58460  | -1.15897 |
| H  | 5.19525  | 0.35768  | 2.11748  |
| H  | 6.07828  | -0.32778 | -0.08263 |
| H  | 4.66105  | -0.14804 | -2.09481 |
| H  | 1.73804  | 1.66345  | 2.68220  |
| H  | 3.17063  | 2.96892  | 4.22594  |
| H  | 3.52617  | 3.46730  | 2.56330  |
| H  | 4.63128  | 2.38818  | 3.41644  |
| H  | 2.44323  | 0.57159  | 4.74489  |
| H  | 3.95497  | 0.02324  | 4.01945  |
| H  | 2.41400  | -0.64802 | 3.45033  |
| H  | 1.06018  | 0.73667  | -2.00695 |
| H  | 1.59089  | -0.32270 | -4.11989 |
| H  | 2.21103  | -1.35307 | -2.82401 |
| H  | 3.31910  | -0.34774 | -3.77705 |
| H  | 1.69550  | 2.19249  | -3.92926 |
| H  | 3.37453  | 2.22144  | -3.36362 |
| H  | 2.09932  | 2.97391  | -2.39630 |
| H  | -5.56321 | -1.20843 | 1.08045  |
| H  | -6.27935 | -1.33373 | -1.28326 |
| H  | -4.93250 | -0.23353 | -3.03685 |
| H  | -2.49673 | 0.61419  | 2.23453  |
| H  | -2.74752 | -1.35446 | 3.71542  |
| H  | -2.30577 | -1.86852 | 2.07985  |
| H  | -3.97605 | -2.04249 | 2.64252  |
| H  | -4.13432 | 0.75637  | 4.07705  |
| H  | -5.42203 | 0.15427  | 3.02533  |
| H  | -4.67905 | 1.72500  | 2.69643  |
| H  | -1.83925 | 1.76245  | -2.37633 |
| H  | -2.81120 | 2.56802  | -4.47116 |
| H  | -3.97948 | 2.86451  | -3.17362 |
| H  | -4.22230 | 1.52315  | -4.29506 |
| H  | -1.32534 | 0.48335  | -4.42786 |
| H  | -2.69809 | -0.59263 | -4.12940 |
| H  | -1.32823 | -0.58562 | -3.00747 |
| N  | -0.00179 | -1.83738 | -0.94469 |
| N  | 1.13878  | 1.58127  | 0.27107  |
| N  | -1.85647 | 1.31223  | 0.03203  |
| O  | 0.39948  | -0.83912 | 1.86797  |
| O  | 1.38501  | -1.65008 | 1.74296  |
| Cu | -0.30406 | 0.28218  | 0.56365  |

6.  $L^1CuXO_2$   $\eta^1$  triplet, X = MeCN

|   |          |          |          |
|---|----------|----------|----------|
| C | -1.19661 | -2.57679 | -0.97697 |
| C | -2.03963 | -3.73392 | -1.23886 |
| C | 3.21230  | 1.56989  | 1.61959  |
| C | 4.57761  | 1.27833  | 1.72706  |
| C | 5.34270  | 0.94024  | 0.61673  |
| C | 4.73969  | 0.88689  | -0.63609 |
| C | 3.37980  | 1.16948  | -0.80264 |

|   |          |          |          |
|---|----------|----------|----------|
| C | 2.43029  | 1.88484  | 2.89714  |
| C | 3.01212  | 3.09067  | 3.66227  |
| C | 2.35608  | 0.66229  | 3.83672  |
| C | 2.76330  | 1.08339  | -2.19744 |
| C | 2.77265  | -0.36609 | -2.72390 |
| C | 3.44779  | 2.03485  | -3.19694 |
| C | -2.97900 | 0.37863  | -0.34962 |
| C | -3.57024 | -0.34060 | 0.72303  |
| C | -4.63206 | -1.21067 | 0.45127  |
| C | -5.11646 | -1.38313 | -0.84227 |
| C | -4.52710 | -0.68103 | -1.89125 |
| C | -3.45915 | 0.19655  | -1.67614 |
| C | -3.07302 | -0.18430 | 2.15878  |
| C | -2.37944 | -1.46555 | 2.66557  |
| C | -4.20282 | 0.23474  | 3.11803  |
| C | -2.82065 | 0.90295  | -2.87203 |
| C | -3.83869 | 1.74409  | -3.66666 |
| C | -2.11443 | -0.09608 | -3.81147 |
| C | 1.63617  | 4.15907  | 0.20230  |
| C | 0.69056  | 2.96824  | 0.15598  |
| C | -0.68408 | 3.28832  | 0.09362  |
| C | -1.83535 | 2.47298  | 0.01357  |
| C | -3.17648 | 3.18671  | 0.07303  |
| C | 2.60892  | 1.52516  | 0.33325  |
| H | -1.91954 | -4.07560 | -2.27072 |
| H | -3.08540 | -3.45310 | -1.07915 |
| H | -1.77355 | -4.55198 | -0.56429 |
| H | 1.12369  | 5.07170  | -0.10643 |
| H | 2.49970  | 4.00169  | -0.44934 |
| H | 2.02414  | 4.31399  | 1.21336  |
| H | -0.89387 | 4.34994  | 0.13506  |
| H | -3.05008 | 4.25110  | 0.27738  |
| H | -3.80769 | 2.75356  | 0.85604  |
| H | -3.72562 | 3.07778  | -0.86797 |
| H | 5.05026  | 1.31360  | 2.70551  |
| H | 6.40029  | 0.71623  | 0.72771  |
| H | 5.33599  | 0.61648  | -1.50346 |
| H | 1.40547  | 2.13416  | 2.61086  |
| H | 2.37876  | 3.34107  | 4.52101  |
| H | 3.08877  | 3.98051  | 3.02977  |
| H | 4.01515  | 2.87681  | 4.04860  |
| H | 1.74771  | 0.89254  | 4.71934  |
| H | 3.35263  | 0.36738  | 4.18581  |
| H | 1.90991  | -0.19775 | 3.33258  |
| H | 1.71966  | 1.39911  | -2.11726 |
| H | 2.26039  | -0.43021 | -3.69157 |
| H | 2.27418  | -1.04431 | -2.02484 |
| H | 3.79709  | -0.72950 | -2.86555 |
| H | 2.95260  | 1.98788  | -4.17369 |
| H | 4.50108  | 1.77534  | -3.35020 |
| H | 3.41002  | 3.07285  | -2.84963 |
| H | -5.09165 | -1.76003 | 1.26946  |
| H | -5.95131 | -2.05325 | -1.03112 |
| H | -4.90466 | -0.81888 | -2.90160 |
| H | -2.32137 | 0.60900  | 2.15890  |
| H | -2.04546 | -1.33930 | 3.70189  |
| H | -1.49948 | -1.70651 | 2.06127  |
| H | -3.05756 | -2.32733 | 2.63858  |
| H | -3.80530 | 0.42203  | 4.12157  |
| H | -4.96725 | -0.54522 | 3.20884  |
| H | -4.70095 | 1.14728  | 2.77507  |
| H | -2.05325 | 1.57964  | -2.48852 |
| H | -3.33240 | 2.29732  | -4.46550 |
| H | -4.35512 | 2.47001  | -3.03081 |

S11

|    |          |          |          |
|----|----------|----------|----------|
| H  | -4.60333 | 1.11595  | -4.13749 |
| H  | -1.65912 | 0.43133  | -4.65785 |
| H  | -2.82250 | -0.82631 | -4.22115 |
| H  | -1.32416 | -0.64388 | -3.29126 |
| N  | -0.53590 | -1.64677 | -0.77336 |
| N  | 1.20099  | 1.73541  | 0.17910  |
| N  | -1.80725 | 1.15192  | -0.12652 |
| O  | 1.40138  | -1.34010 | 1.26895  |
| O  | 2.24255  | -1.97878 | 0.63429  |
| Cu | 0.00022  | 0.21778  | -0.04985 |

7. L<sup>1</sup>CuX, X = 2,3-dihydrofuran

|   |          |          |          |
|---|----------|----------|----------|
| C | 3.12743  | 0.84179  | 1.36324  |
| C | 4.44015  | 0.35815  | 1.35904  |
| C | 5.16771  | 0.24572  | 0.17623  |
| C | 4.57588  | 0.61764  | -1.02809 |
| C | 3.26414  | 1.10457  | -1.07840 |
| C | 2.33601  | 0.90010  | 2.66634  |
| C | 3.12043  | 1.55547  | 3.81483  |
| C | 1.84372  | -0.50309 | 3.07212  |
| C | 2.63931  | 1.45056  | -2.42752 |
| C | 2.42213  | 0.18885  | -3.28515 |
| C | 3.46457  | 2.49223  | -3.20375 |
| C | -3.10390 | 0.42929  | -0.29201 |
| C | -3.79171 | -0.05600 | 0.84706  |
| C | -4.90696 | -0.87971 | 0.65965  |
| C | -5.34940 | -1.22130 | -0.61610 |
| C | -4.67189 | -0.73170 | -1.73051 |
| C | -3.55090 | 0.09479  | -1.59554 |
| C | -3.29375 | 0.26139  | 2.25407  |
| C | -2.47277 | -0.91230 | 2.82316  |
| C | -4.42373 | 0.65393  | 3.21987  |
| C | -2.79340 | 0.57120  | -2.83207 |
| C | -3.71803 | 1.08567  | -3.94740 |
| C | -1.86471 | -0.53706 | -3.36587 |
| C | 1.74254  | 3.94899  | 0.30233  |
| C | 0.72330  | 2.83126  | 0.15326  |
| C | -0.63550 | 3.22248  | 0.08563  |
| C | -1.82590 | 2.47144  | -0.05792 |
| C | 1.38043  | -2.43644 | -0.45128 |
| C | -0.86715 | -2.92659 | -0.30367 |
| C | 1.27686  | -3.60774 | -1.06977 |
| C | -0.17934 | -4.01244 | -1.15951 |
| C | -3.12168 | 3.26208  | -0.13817 |
| C | 2.53435  | 1.22117  | 0.13203  |
| H | -1.69663 | -2.42255 | -0.79892 |
| H | 2.23437  | -1.81510 | -0.21962 |
| H | -0.53646 | -4.00662 | -2.19684 |
| H | 1.25857  | 4.92470  | 0.36311  |
| H | 2.43965  | 3.95970  | -0.54151 |
| H | 2.34664  | 3.80241  | 1.20400  |
| H | -0.79119 | 4.29293  | 0.14045  |
| H | -2.94018 | 4.33471  | -0.05702 |
| H | -3.81069 | 2.96347  | 0.65894  |
| H | -3.63754 | 3.06788  | -1.08446 |
| H | 4.90011  | 0.06045  | 2.29723  |
| H | 6.18644  | -0.13079 | 0.19292  |
| H | 5.14107  | 0.52214  | -1.95159 |
| H | 1.44778  | 1.51037  | 2.48235  |
| H | 2.48153  | 1.65888  | 4.69860  |
| H | 3.47861  | 2.55162  | 3.53621  |
| H | 3.99061  | 0.95910  | 4.10988  |
| H | 1.24052  | -0.45370 | 3.98581  |

|    |          |          |          |
|----|----------|----------|----------|
| H  | 2.68736  | -1.17720 | 3.26073  |
| H  | 1.22711  | -0.94793 | 2.28507  |
| H  | 1.65405  | 1.88195  | -2.23297 |
| H  | 1.92942  | 0.44526  | -4.22990 |
| H  | 1.79631  | -0.54280 | -2.76521 |
| H  | 3.37413  | -0.29756 | -3.52616 |
| H  | 2.95432  | 2.76937  | -4.13274 |
| H  | 4.45294  | 2.10407  | -3.47338 |
| H  | 3.61667  | 3.40330  | -2.61667 |
| H  | -5.43793 | -1.26298 | 1.52638  |
| H  | -6.21841 | -1.86097 | -0.74140 |
| H  | -5.02052 | -0.99889 | -2.72411 |
| H  | -2.61536 | 1.11562  | 2.17611  |
| H  | -2.09395 | -0.67420 | 3.82363  |
| H  | -1.61272 | -1.13626 | 2.18423  |
| H  | -3.08538 | -1.81822 | 2.89984  |
| H  | -4.00560 | 0.97491  | 4.17996  |
| H  | -5.09986 | -0.18331 | 3.42418  |
| H  | -5.02427 | 1.47655  | 2.81865  |
| H  | -2.15280 | 1.40247  | -2.52554 |
| H  | -3.12428 | 1.51607  | -4.76094 |
| H  | -4.39881 | 1.85910  | -3.57780 |
| H  | -4.32738 | 0.28450  | -4.37959 |
| H  | -1.29726 | -0.18694 | -4.23553 |
| H  | -2.44121 | -1.41866 | -3.67006 |
| H  | -1.14531 | -0.84638 | -2.60100 |
| H  | -1.19713 | -3.30144 | 0.66856  |
| H  | 2.10361  | -4.17804 | -1.46928 |
| H  | -0.36276 | -5.01488 | -0.75805 |
| N  | 1.15508  | 1.57190  | 0.10150  |
| N  | -1.88253 | 1.14067  | -0.12513 |
| O  | 0.16221  | -1.90928 | -0.03374 |
| Cu | -0.19653 | 0.15983  | -0.01022 |

8.  $L^1CuXO_2$   $\eta^1$  singlet, X = 2,3-dihydrofuran

|   |          |          |          |
|---|----------|----------|----------|
| C | -1.15587 | 2.36375  | -2.60743 |
| C | -0.87397 | 3.60057  | -3.19952 |
| C | 0.40809  | 3.93736  | -3.61986 |
| C | 1.44256  | 3.02239  | -3.45465 |
| C | 1.22233  | 1.77082  | -2.86916 |
| C | -2.59513 | 2.07677  | -2.17890 |
| C | -3.55804 | 2.02983  | -3.38506 |
| C | -3.10407 | 3.11259  | -1.15873 |
| C | 2.39873  | 0.80474  | -2.72457 |
| C | 3.50818  | 1.38410  | -1.82762 |
| C | 2.97594  | 0.40085  | -4.09628 |
| C | 0.54620  | -2.69702 | 1.41501  |
| C | -0.34143 | -2.86132 | 2.51063  |
| C | 0.15187  | -3.43868 | 3.68596  |
| C | 1.48081  | -3.83560 | 3.79797  |
| C | 2.34501  | -3.65439 | 2.72080  |
| C | 1.90468  | -3.09261 | 1.51722  |
| C | -1.80161 | -2.41784 | 2.44564  |
| C | -2.12249 | -1.34236 | 3.50034  |
| C | -2.76891 | -3.61140 | 2.57404  |
| C | 2.89655  | -2.89826 | 0.36992  |
| C | 3.58529  | -4.21453 | -0.04133 |
| C | 3.95262  | -1.83105 | 0.71661  |
| C | 1.08602  | 2.59936  | 1.20595  |
| C | 1.96841  | 0.94377  | 2.50580  |
| C | 2.12780  | 3.22728  | 2.14792  |
| C | 2.43876  | 2.06144  | 3.05320  |
| C | -0.87472 | -0.73451 | -4.03593 |

|    |          |          |          |
|----|----------|----------|----------|
| C  | -0.59757 | -0.90401 | -2.55090 |
| C  | -0.66759 | -2.22627 | -2.06723 |
| C  | -0.30495 | -2.77180 | -0.82052 |
| C  | -0.35287 | -4.28727 | -0.71731 |
| C  | -0.09112 | 1.43707  | -2.44285 |
| H  | -1.03323 | -1.69908 | -4.52092 |
| H  | -0.04623 | -0.22484 | -4.53504 |
| H  | -1.76268 | -0.11758 | -4.19529 |
| H  | -0.97013 | -2.95710 | -2.80676 |
| H  | -0.76148 | -4.73289 | -1.62548 |
| H  | -0.96831 | -4.59575 | 0.13381  |
| H  | 0.64493  | -4.70195 | -0.55031 |
| H  | -1.68265 | 4.31271  | -3.33835 |
| H  | 0.59908  | 4.90440  | -4.07646 |
| H  | 2.44398  | 3.28469  | -3.78527 |
| H  | -2.61725 | 1.10152  | -1.68640 |
| H  | -4.57302 | 1.78940  | -3.04988 |
| H  | -3.26498 | 1.27932  | -4.12510 |
| H  | -3.60021 | 2.99631  | -3.90020 |
| H  | -4.09538 | 2.82511  | -0.79499 |
| H  | -3.18513 | 4.10963  | -1.60661 |
| H  | -2.43613 | 3.16835  | -0.29762 |
| H  | 2.02951  | -0.10389 | -2.24138 |
| H  | 4.34648  | 0.68277  | -1.75371 |
| H  | 3.13770  | 1.56900  | -0.81564 |
| H  | 3.89887  | 2.32648  | -2.22699 |
| H  | 3.77285  | -0.34075 | -3.97335 |
| H  | 3.40216  | 1.26276  | -4.62211 |
| H  | 2.21079  | -0.03530 | -4.74626 |
| H  | -0.52062 | -3.57593 | 4.52810  |
| H  | 1.84339  | -4.28138 | 4.71988  |
| H  | 3.38464  | -3.95621 | 2.81631  |
| H  | -1.97911 | -1.96643 | 1.46711  |
| H  | -3.15738 | -1.00424 | 3.38834  |
| H  | -1.47573 | -0.46871 | 3.38029  |
| H  | -1.99699 | -1.72512 | 4.51984  |
| H  | -3.80501 | -3.27397 | 2.46152  |
| H  | -2.68225 | -4.09909 | 3.55246  |
| H  | -2.57822 | -4.37153 | 1.80839  |
| H  | 2.34049  | -2.53033 | -0.49674 |
| H  | 4.22874  | -4.05173 | -0.91279 |
| H  | 2.85973  | -4.99171 | -0.29988 |
| H  | 4.21578  | -4.60923 | 0.76286  |
| H  | 4.65033  | -1.69558 | -0.11749 |
| H  | 4.53690  | -2.12084 | 1.59696  |
| H  | 3.48465  | -0.86497 | 0.92227  |
| H  | 0.06033  | 2.79739  | 1.53637  |
| H  | 1.18444  | 2.88845  | 0.15854  |
| H  | 2.00180  | -0.08895 | 2.83691  |
| H  | 1.72712  | 4.10801  | 2.65838  |
| H  | 3.02047  | 3.55369  | 1.59733  |
| H  | 2.98055  | 2.12715  | 3.99157  |
| N  | -0.29598 | 0.16580  | -1.81534 |
| N  | 0.06920  | -2.05249 | 0.23561  |
| O  | 1.31256  | 1.16052  | 1.28905  |
| O  | -2.69118 | 0.53542  | 0.83676  |
| O  | -1.52938 | 1.08138  | 0.87074  |
| Cu | -0.16732 | -0.08343 | 0.16180  |

9.  $L^1CuXO_2$   $\eta^1$  triplet, X = 2,3-dihydrofuran

|   |          |          |          |
|---|----------|----------|----------|
| C | -1.19661 | -2.57679 | -0.97697 |
| C | -2.03963 | -3.73392 | -1.23886 |
| C | 3.21230  | 1.56989  | 1.61959  |
| C | 4.57761  | 1.27833  | 1.72706  |
| C | 5.34270  | 0.94024  | 0.61673  |
| C | 4.73969  | 0.88689  | -0.63609 |
| C | 3.37980  | 1.16948  | -0.80264 |
| C | 2.43029  | 1.88484  | 2.89714  |
| C | 3.01212  | 3.09067  | 3.66227  |
| C | 2.35608  | 0.66229  | 3.83672  |
| C | 2.76330  | 1.08339  | -2.19744 |
| C | 2.77265  | -0.36609 | -2.72390 |
| C | 3.44779  | 2.03485  | -3.19694 |
| C | -2.97900 | 0.37863  | -0.34962 |
| C | -3.57024 | -0.34060 | 0.72303  |
| C | -4.63206 | -1.21067 | 0.45127  |
| C | -5.11646 | -1.38313 | -0.84227 |
| C | -4.52710 | -0.68103 | -1.89125 |
| C | -3.45915 | 0.19655  | -1.67614 |
| C | -3.07302 | -0.18430 | 2.15878  |
| C | -2.37944 | -1.46555 | 2.66557  |
| C | -4.20282 | 0.23474  | 3.11803  |
| C | -2.82065 | 0.90295  | -2.87203 |
| C | -3.83869 | 1.74409  | -3.66666 |
| C | -2.11443 | -0.09608 | -3.81147 |
| C | 1.63617  | 4.15907  | 0.20230  |
| C | 0.69056  | 2.96824  | 0.15598  |
| C | -0.68408 | 3.28832  | 0.09362  |
| C | -1.83535 | 2.47298  | 0.01357  |
| C | -3.17648 | 3.18671  | 0.07303  |
| C | 2.60892  | 1.52516  | 0.33325  |
| H | -1.91954 | -4.07560 | -2.27072 |
| H | -3.08540 | -3.45310 | -1.07915 |
| H | -1.77355 | -4.55198 | -0.56429 |
| H | 1.12369  | 5.07170  | -0.10643 |
| H | 2.49970  | 4.00169  | -0.44934 |
| H | 2.02414  | 4.31399  | 1.21336  |
| H | -0.89387 | 4.34994  | 0.13506  |
| H | -3.05008 | 4.25110  | 0.27738  |
| H | -3.80769 | 2.75356  | 0.85604  |
| H | -3.72562 | 3.07778  | -0.86797 |
| H | 5.05026  | 1.31360  | 2.70551  |
| H | 6.40029  | 0.71623  | 0.72771  |
| H | 5.33599  | 0.61648  | -1.50346 |
| H | 1.40547  | 2.13416  | 2.61086  |
| H | 2.37876  | 3.34107  | 4.52101  |
| H | 3.08877  | 3.98051  | 3.02977  |
| H | 4.01515  | 2.87681  | 4.04860  |
| H | 1.74771  | 0.89254  | 4.71934  |
| H | 3.35263  | 0.36738  | 4.18581  |
| H | 1.90991  | -0.19775 | 3.33258  |
| H | 1.71966  | 1.39911  | -2.11726 |
| H | 2.26039  | -0.43021 | -3.69157 |
| H | 2.27418  | -1.04431 | -2.02484 |
| H | 3.79709  | -0.72950 | -2.86555 |
| H | 2.95260  | 1.98788  | -4.17369 |
| H | 4.50108  | 1.77534  | -3.35020 |
| H | 3.41002  | 3.07285  | -2.84963 |
| H | -5.09165 | -1.76003 | 1.26946  |
| H | -5.95131 | -2.05325 | -1.03112 |
| H | -4.90466 | -0.81888 | -2.90160 |
| H | -2.32137 | 0.60900  | 2.15890  |
| H | -2.04546 | -1.33930 | 3.70189  |

|    |          |          |          |
|----|----------|----------|----------|
| H  | -1.49948 | -1.70651 | 2.06127  |
| H  | -3.05756 | -2.32733 | 2.63858  |
| H  | -3.80530 | 0.42203  | 4.12157  |
| H  | -4.96725 | -0.54522 | 3.20884  |
| H  | -4.70095 | 1.14728  | 2.77507  |
| H  | -2.05325 | 1.57964  | -2.48852 |
| H  | -3.33240 | 2.29732  | -4.46550 |
| H  | -4.35512 | 2.47001  | -3.03081 |
| H  | -4.60333 | 1.11595  | -4.13749 |
| H  | -1.65912 | 0.43133  | -4.65785 |
| H  | -2.82250 | -0.82631 | -4.22115 |
| H  | -1.32416 | -0.64388 | -3.29126 |
| N  | -0.53590 | -1.64677 | -0.77336 |
| N  | 1.20099  | 1.73541  | 0.17910  |
| N  | -1.80725 | 1.15192  | -0.12652 |
| O  | 1.40138  | -1.34010 | 1.26895  |
| O  | 2.24255  | -1.97878 | 0.63429  |
| Cu | 0.00022  | 0.21778  | -0.04985 |

10. L<sup>1</sup>CuX, X = furan

|   |          |          |          |
|---|----------|----------|----------|
| C | 3.15617  | 0.85411  | 1.40064  |
| C | 4.48278  | 0.40789  | 1.41348  |
| C | 5.21801  | 0.28778  | 0.23656  |
| C | 4.62343  | 0.61635  | -0.97932 |
| C | 3.29998  | 1.06562  | -1.04571 |
| C | 2.35727  | 0.92901  | 2.69872  |
| C | 3.11570  | 1.64350  | 3.82969  |
| C | 1.90505  | -0.47405 | 3.14825  |
| C | 2.66016  | 1.36299  | -2.39902 |
| C | 2.32413  | 0.05837  | -3.14700 |
| C | 3.52153  | 2.28635  | -3.27698 |
| C | -3.10672 | 0.33582  | -0.32139 |
| C | -3.76756 | -0.19041 | 0.81589  |
| C | -4.89585 | -0.99614 | 0.62619  |
| C | -5.37528 | -1.28308 | -0.64969 |
| C | -4.71675 | -0.76276 | -1.76108 |
| C | -3.58264 | 0.04583  | -1.62448 |
| C | -3.23722 | 0.06540  | 2.22391  |
| C | -2.50844 | -1.17817 | 2.76961  |
| C | -4.33125 | 0.52866  | 3.20076  |
| C | -2.85108 | 0.54578  | -2.86710 |
| C | -3.78689 | 1.24441  | -3.86856 |
| C | -2.08202 | -0.60229 | -3.54967 |
| C | 1.72567  | 3.88978  | 0.30631  |
| C | 0.72140  | 2.75838  | 0.15863  |
| C | -0.64225 | 3.13158  | 0.09166  |
| C | -1.82926 | 2.37492  | -0.05625 |
| C | 1.38525  | -2.58894 | -0.33250 |
| C | -0.80742 | -2.91105 | -0.50616 |
| C | 1.21139  | -3.80808 | -0.90118 |
| C | -0.20722 | -4.01656 | -1.01361 |
| C | -3.12914 | 3.16180  | -0.09764 |
| C | 2.56063  | 1.18308  | 0.15766  |
| H | 2.23788  | -1.99414 | -0.04693 |
| H | 1.22975  | 4.86026  | 0.35178  |
| H | 2.42988  | 3.89838  | -0.53202 |
| H | 2.32399  | 3.76119  | 1.21447  |
| H | -0.80847 | 4.19978  | 0.15706  |
| H | -2.95199 | 4.23117  | 0.02461  |
| H | -3.80970 | 2.82815  | 0.69258  |
| H | -3.65188 | 3.00328  | -1.04646 |
| H | 4.94785  | 0.14925  | 2.36068  |
| H | 6.24678  | -0.05952 | 0.26682  |

S16

|    |          |          |          |
|----|----------|----------|----------|
| H  | 5.19745  | 0.51679  | -1.89640 |
| H  | 1.45191  | 1.50648  | 2.49301  |
| H  | 2.46751  | 1.76009  | 4.70493  |
| H  | 3.45010  | 2.63864  | 3.51974  |
| H  | 3.99859  | 1.08062  | 4.15138  |
| H  | 1.29826  | -0.41433 | 4.05884  |
| H  | 2.76746  | -1.11710 | 3.35844  |
| H  | 1.30233  | -0.96162 | 2.37550  |
| H  | 1.71372  | 1.87620  | -2.21061 |
| H  | 1.82016  | 0.27297  | -4.09602 |
| H  | 1.66460  | -0.57880 | -2.54993 |
| H  | 3.23195  | -0.51466 | -3.36816 |
| H  | 2.98527  | 2.54287  | -4.19702 |
| H  | 4.46322  | 1.81008  | -3.57048 |
| H  | 3.76817  | 3.21773  | -2.75730 |
| H  | -5.40675 | -1.40737 | 1.49241  |
| H  | -6.25447 | -1.90818 | -0.77678 |
| H  | -5.08712 | -0.99375 | -2.75614 |
| H  | -2.49678 | 0.86674  | 2.15423  |
| H  | -2.09809 | -0.98311 | 3.76681  |
| H  | -1.67926 | -1.46810 | 2.11610  |
| H  | -3.19036 | -2.03287 | 2.84613  |
| H  | -3.88968 | 0.78807  | 4.16905  |
| H  | -5.07698 | -0.25306 | 3.38120  |
| H  | -4.85823 | 1.40977  | 2.82114  |
| H  | -2.10922 | 1.27903  | -2.54073 |
| H  | -3.20967 | 1.65857  | -4.70233 |
| H  | -4.33802 | 2.06455  | -3.39751 |
| H  | -4.52159 | 0.55112  | -4.29208 |
| H  | -1.51835 | -0.23314 | -4.41377 |
| H  | -2.76700 | -1.38210 | -3.90171 |
| H  | -1.37405 | -1.06810 | -2.85723 |
| H  | -1.82769 | -2.59176 | -0.36661 |
| H  | 1.99656  | -4.48455 | -1.20423 |
| H  | -0.70975 | -4.88224 | -1.41854 |
| N  | 1.17367  | 1.50441  | 0.10627  |
| N  | -1.88207 | 1.04503  | -0.15363 |
| O  | 0.15453  | -2.01950 | -0.07739 |
| Cu | -0.17634 | 0.11243  | -0.06003 |

11.  $L^1CuXO_2$   $\eta^1$  singlet, X = furan

|   |               |               |               |
|---|---------------|---------------|---------------|
| C | 3.6565476229  | 1.5350805397  | -1.8050844533 |
| C | 2.0960336770  | 3.2905873742  | 1.8643002602  |
| C | 2.2176279770  | 1.1050076896  | 2.3337738526  |
| C | -.8462120856  | -.6628416773  | -4.0353341918 |
| C | -.5992747962  | -.8917194069  | -2.5492280674 |
| C | -.7000192358  | -2.2390088788 | -2.1415783576 |
| C | -.3690013397  | -2.8248878004 | -.9106020833  |
| C | -.3626150148  | -4.3421342606 | -.8683168727  |
| C | -.0851673469  | 1.4258701054  | -2.3302732953 |
| C | -1.1446022986 | 2.3267460920  | -2.6167814496 |
| C | -.8354868388  | 3.5477873945  | -3.2306074606 |
| C | .4700183576   | 3.8893805639  | -3.5624399600 |
| C | 1.5029334334  | 3.0051374810  | -3.2684932886 |
| C | 1.2570048510  | 1.7754211795  | -2.6475907482 |
| C | -2.6090985484 | 2.0250875786  | -2.3059654598 |
| C | -3.4757522949 | 2.0126203119  | -3.5845487478 |
| C | -3.1866738015 | 3.0344050636  | -1.2945825046 |
| C | 2.4233806180  | .8226087811   | -2.3919524580 |
| C | 2.6926706980  | 2.3132209016  | 2.7335098195  |
| C | 2.8164228721  | .0651320942   | -3.6791583503 |
| C | .5014795187   | -2.7565850970 | 1.3315955618  |
| C | -.3125930943  | -2.8900048521 | 2.4863998751  |



|    |               |               |               |
|----|---------------|---------------|---------------|
| C  | .2542432717   | -3.4428102584 | 3.6385633437  |
| C  | 1.5878627597  | -3.8392661595 | 3.6680027112  |
| C  | 2.3810826615  | -3.6868006861 | 2.5325168969  |
| C  | 1.8655963479  | -3.1476771052 | 1.3500453780  |
| C  | -1.7791877220 | -2.4620064389 | 2.4845974469  |
| C  | -2.0860557117 | -1.4325289207 | 3.5880143427  |
| C  | -2.7255540990 | -3.6738988341 | 2.5739957944  |
| C  | 2.7843973899  | -2.9612323958 | .1415129000   |
| C  | 3.4999573498  | -4.2648533968 | -.2654883780  |
| C  | 3.8158425030  | -1.8412701855 | .3826451964   |
| C  | 1.3036975138  | 2.6043169486  | 1.0006496757  |
| H  | 2.3645492696  | .0924623429   | 2.6709514425  |
| H  | 2.2411223212  | 4.3602284282  | 1.8818274610  |
| H  | -.7139023228  | -4.7163431623 | .0960646430   |
| H  | .6655777645   | 2.8872927233  | .1803450458   |
| H  | -.6706256752  | -1.5797598234 | -4.6010942674 |
| H  | -.2197031716  | .1301044532   | -4.4448585328 |
| H  | -1.8880730539 | -.3667722657  | -4.1934261740 |
| H  | -.9728072360  | -2.9348391887 | -2.9254596782 |
| H  | -.9952221649  | -4.7464074167 | -1.6612082215 |
| H  | 3.3814359013  | 2.4942017103  | 3.5448256049  |
| H  | .6491446811   | -4.7302559215 | -1.0198420921 |
| H  | -1.6407686687 | 4.2389152475  | -3.4643855454 |
| H  | .6815863712   | 4.8365522677  | -4.0516909491 |
| H  | 2.5213949960  | 3.2708617510  | -3.5353803387 |
| H  | -2.6627957166 | 1.0322575153  | -1.8505810576 |
| H  | -4.5021358322 | 1.7122853463  | -3.3474801317 |
| H  | -3.0896523177 | 1.3240279941  | -4.3424602080 |
| H  | -3.5234311557 | 3.0059236431  | -4.0453534777 |
| H  | -4.2165434226 | 2.7664160366  | -1.0367545654 |
| H  | -3.1978341939 | 4.0468521119  | -1.7151363071 |
| H  | -2.6041014839 | 3.0474846193  | -.3713263852  |
| H  | 2.0860714118  | .0818681987   | -1.6613091892 |
| H  | 4.4107224226  | .7968699946   | -1.5119735715 |
| H  | 3.3985794943  | 2.1277927066  | -.9231072987  |
| H  | 4.1283495302  | 2.2039506362  | -2.5337126881 |
| H  | 3.6568178154  | -.6117553317  | -3.4867020695 |
| H  | 3.1259188547  | .7655802230   | -4.4639960152 |
| H  | 1.9900208519  | -.5328116323  | -4.0736422219 |
| H  | -.3611732134  | -3.5650792455 | 4.5259672030  |
| H  | 2.0104084404  | -4.2648704030 | 4.5737112463  |
| H  | 3.4239486917  | -3.9901886441 | 2.5673326362  |
| H  | -1.9842169636 | -1.9719615609 | 1.5291301866  |
| H  | -3.1221903906 | -1.0893144293 | 3.5027883665  |
| H  | -1.4395367965 | -.5537635119  | 3.4980346040  |
| H  | -1.9482008105 | -1.8539743136 | 4.5901343012  |
| H  | -3.7697343703 | -3.3465472996 | 2.5169445053  |
| H  | -2.5953932773 | -4.2167416807 | 3.5169236872  |
| H  | -2.5502179178 | -4.3805675508 | 1.7556646368  |
| H  | 2.1707666352  | -2.6449104245 | -.7059160384  |
| H  | 4.0549170080  | -4.1161802002 | -1.1985213000 |
| H  | 2.7941604509  | -5.0869874226 | -.4202903514  |
| H  | 4.2198151300  | -4.5885724909 | .4939618041   |
| H  | 4.4542711661  | -1.7134570058 | -.4993383580  |
| H  | 4.4667145628  | -2.0757225872 | 1.2328943460  |
| H  | 3.3282604917  | -.8833819220  | .5845223094   |
| N  | -.0470928174  | -2.1312412995 | .1802978922   |
| N  | -.3268059139  | .1369219684   | -1.7457059665 |
| O  | 1.3682813452  | 1.2637598486  | 1.2706811406  |
| O  | -2.7197128351 | .8490212187   | 1.0886822719  |
| O  | -1.4676889463 | 1.1437527693  | 1.0327929887  |
| Cu | -.4625252733  | -.2462637520  | .3071272615   |

12.  $L^1CuXO_2$   $\eta^1$  triplet, X = furan

|   |          |          |          |
|---|----------|----------|----------|
| C | 3.30423  | 0.55552  | 1.26086  |
| C | 4.65283  | 0.19935  | 1.14018  |
| C | 5.28544  | 0.15394  | -0.09843 |
| C | 4.56607  | 0.47457  | -1.24544 |
| C | 3.22035  | 0.85424  | -1.18179 |
| C | 2.65486  | 0.58856  | 2.64354  |
| C | 3.10306  | 1.82674  | 3.44832  |
| C | 2.92117  | -0.69575 | 3.45264  |
| C | 2.47932  | 1.19318  | -2.47587 |
| C | 2.31399  | -0.04558 | -3.37821 |
| C | 3.16399  | 2.33455  | -3.25407 |
| C | -3.08214 | 0.02989  | -0.45590 |
| C | -3.81168 | -0.63450 | 0.56561  |
| C | -4.94549 | -1.37565 | 0.21185  |
| C | -5.35144 | -1.48914 | -1.11463 |
| C | -4.61584 | -0.85449 | -2.11131 |
| C | -3.48238 | -0.08965 | -1.81241 |
| C | -3.39831 | -0.55160 | 2.03482  |
| C | -3.23721 | -1.94479 | 2.67479  |
| C | -4.38258 | 0.30617  | 2.85402  |
| C | -2.69666 | 0.55371  | -2.95474 |
| C | -3.57890 | 1.46617  | -3.82910 |
| C | -2.00201 | -0.51118 | -3.82716 |
| C | 1.70450  | 3.60202  | 0.22102  |
| C | 0.72530  | 2.43674  | 0.20256  |
| C | -0.64455 | 2.79796  | 0.18427  |
| C | -1.82776 | 2.04739  | -0.01467 |
| C | 1.20585  | -3.04503 | -1.13796 |
| C | -0.99662 | -3.20529 | -1.25757 |
| C | 0.92445  | -4.35584 | -1.34631 |
| C | -0.50669 | -4.45973 | -1.42331 |
| C | -3.10785 | 2.86084  | -0.13549 |
| C | 2.58535  | 0.89639  | 0.08602  |
| H | 2.11545  | -2.47981 | -1.01051 |
| H | 1.25512  | 4.47945  | 0.69080  |
| H | 1.97789  | 3.87991  | -0.80405 |
| H | 2.62844  | 3.35134  | 0.74500  |
| H | -0.81419 | 3.86556  | 0.26596  |
| H | -3.00748 | 3.81808  | 0.38047  |
| H | -3.96467 | 2.32365  | 0.27689  |
| H | -3.33279 | 3.07309  | -1.18685 |
| H | 5.21773  | -0.04876 | 2.03479  |
| H | 6.33165  | -0.13133 | -0.16875 |
| H | 5.06029  | 0.43318  | -2.21251 |
| H | 1.57420  | 0.66456  | 2.49482  |
| H | 2.61295  | 1.84821  | 4.42863  |
| H | 2.85662  | 2.75874  | 2.93099  |
| H | 4.18616  | 1.81553  | 3.61654  |
| H | 2.34657  | -0.67979 | 4.38548  |
| H | 3.97791  | -0.79421 | 3.72497  |
| H | 2.63360  | -1.59215 | 2.89604  |
| H | 1.47512  | 1.53126  | -2.20763 |
| H | 1.77158  | 0.21422  | -4.29444 |
| H | 1.75358  | -0.83702 | -2.87299 |
| H | 3.28616  | -0.45682 | -3.67213 |
| H | 2.56192  | 2.62019  | -4.12400 |
| H | 4.15169  | 2.03642  | -3.62338 |
| H | 3.30206  | 3.22365  | -2.63052 |
| H | -5.51563 | -1.87512 | 0.99081  |
| H | -6.23126 | -2.07323 | -1.37064 |
| H | -4.92671 | -0.95724 | -3.14778 |
| H | -2.42300 | -0.05942 | 2.07414  |
| H | -2.84697 | -1.85207 | 3.69456  |

|    |          |          |          |
|----|----------|----------|----------|
| H  | -2.54360 | -2.57129 | 2.10637  |
| H  | -4.19319 | -2.47683 | 2.73748  |
| H  | -4.04649 | 0.39202  | 3.89378  |
| H  | -5.38396 | -0.13936 | 2.86263  |
| H  | -4.47137 | 1.31746  | 2.44468  |
| H  | -1.91025 | 1.17238  | -2.51536 |
| H  | -2.96929 | 1.98285  | -4.57885 |
| H  | -4.09643 | 2.22371  | -3.23228 |
| H  | -4.34285 | 0.89372  | -4.36723 |
| H  | -1.42984 | -0.03636 | -4.63252 |
| H  | -2.73250 | -1.18418 | -4.29045 |
| H  | -1.31074 | -1.12124 | -3.23913 |
| H  | -1.98555 | -2.77469 | -1.24474 |
| H  | 1.64405  | -5.15711 | -1.43587 |
| H  | -1.08875 | -5.35597 | -1.58422 |
| N  | 1.18881  | 1.18792  | 0.16083  |
| N  | -1.87983 | 0.71945  | -0.12112 |
| O  | -0.02736 | -1.36252 | 1.92403  |
| O  | 0.37255  | -2.54130 | 1.89710  |
| O  | 0.04077  | -2.31828 | -1.08677 |
| Cu | -0.18099 | -0.22510 | 0.19292  |

13. L<sup>1</sup>CuX, X = oxetane

|   |          |          |          |
|---|----------|----------|----------|
| C | -0.59225 | -3.20632 | -0.45532 |
| C | 0.68272  | -4.05977 | -0.62360 |
| C | 3.12767  | 0.67589  | 1.38165  |
| C | 4.44759  | 0.21117  | 1.39373  |
| C | 5.19586  | 0.12071  | 0.22331  |
| C | 4.62079  | 0.50279  | -0.98617 |
| C | 3.30516  | 0.97353  | -1.05195 |
| C | 2.33058  | 0.73571  | 2.68185  |
| C | 3.06284  | 1.51715  | 3.78734  |
| C | 1.95266  | -0.67744 | 3.16729  |
| C | 2.69013  | 1.32573  | -2.40487 |
| C | 2.29975  | 0.04814  | -3.17626 |
| C | 3.59553  | 2.22423  | -3.26562 |
| C | -3.12826 | 0.30178  | -0.29001 |
| C | -3.78317 | -0.20099 | 0.86233  |
| C | -4.92086 | -0.99813 | 0.69641  |
| C | -5.41725 | -1.30004 | -0.56864 |
| C | -4.77070 | -0.79803 | -1.69486 |
| C | -3.63082 | 0.00447  | -1.58343 |
| C | -3.23146 | 0.06117  | 2.26098  |
| C | -2.52327 | -1.19272 | 2.81296  |
| C | -4.30399 | 0.56179  | 3.24356  |
| C | -2.90515 | 0.48198  | -2.83996 |
| C | -3.85260 | 1.04721  | -3.91226 |
| C | -2.03113 | -0.64654 | -3.42479 |
| C | 1.76276  | 3.77310  | 0.28823  |
| C | 0.73845  | 2.65731  | 0.14050  |
| C | -0.61793 | 3.05891  | 0.07179  |
| C | -1.81841 | 2.32142  | -0.06337 |
| C | -3.10750 | 3.12848  | -0.09904 |
| C | 2.54619  | 1.05407  | 0.14531  |
| H | 2.06937  | -2.76316 | 0.60324  |
| H | 0.80152  | -4.85432 | 0.11596  |
| H | 2.02275  | -2.32638 | -1.12900 |
| H | -1.27162 | -3.48739 | 0.35459  |
| H | -1.16321 | -3.01682 | -1.36897 |
| H | 0.84602  | -4.46561 | -1.62399 |
| H | 1.28281  | 4.75082  | 0.35641  |
| H | 2.45328  | 3.78584  | -0.56209 |
| H | 2.37449  | 3.62199  | 1.18395  |

|    |          |          |          |
|----|----------|----------|----------|
| H  | -0.76374 | 4.13068  | 0.13244  |
| H  | -2.91274 | 4.19828  | -0.00748 |
| H  | -3.77718 | 2.82543  | 0.71309  |
| H  | -3.65204 | 2.95353  | -1.03320 |
| H  | 4.89861  | -0.08464 | 2.33791  |
| H  | 6.21947  | -0.24309 | 0.25298  |
| H  | 5.20624  | 0.42971  | -1.89900 |
| H  | 1.39660  | 1.26280  | 2.46908  |
| H  | 2.42621  | 1.61066  | 4.67430  |
| H  | 3.32845  | 2.52573  | 3.45434  |
| H  | 3.98693  | 1.01770  | 4.09948  |
| H  | 1.36481  | -0.62923 | 4.09128  |
| H  | 2.84695  | -1.27873 | 3.37037  |
| H  | 1.35347  | -1.20075 | 2.41521  |
| H  | 1.76583  | 1.87762  | -2.21512 |
| H  | 1.83274  | 0.29545  | -4.13702 |
| H  | 1.58542  | -0.54994 | -2.60041 |
| H  | 3.18023  | -0.57316 | -3.38051 |
| H  | 3.06824  | 2.53380  | -4.17488 |
| H  | 4.50940  | 1.70880  | -3.58140 |
| H  | 3.89528  | 3.12800  | -2.72520 |
| H  | -5.42492 | -1.39521 | 1.57388  |
| H  | -6.30122 | -1.92290 | -0.67677 |
| H  | -5.15743 | -1.04050 | -2.68129 |
| H  | -2.47335 | 0.84419  | 2.17320  |
| H  | -2.09560 | -0.99587 | 3.80309  |
| H  | -1.70862 | -1.50499 | 2.15059  |
| H  | -3.22326 | -2.03138 | 2.90917  |
| H  | -3.84695 | 0.82372  | 4.20439  |
| H  | -5.06754 | -0.19836 | 3.44278  |
| H  | -4.81396 | 1.45100  | 2.85865  |
| H  | -2.22670 | 1.28643  | -2.54366 |
| H  | -3.27609 | 1.46417  | -4.74568 |
| H  | -4.48586 | 1.84373  | -3.50796 |
| H  | -4.51235 | 0.27772  | -4.32832 |
| H  | -1.47526 | -0.29875 | -4.30366 |
| H  | -2.64516 | -1.50221 | -3.73024 |
| H  | -1.30294 | -0.99645 | -2.68495 |
| N  | 1.16493  | 1.39527  | 0.09078  |
| N  | -1.89145 | 0.99344  | -0.15544 |
| O  | 0.20290  | -2.03598 | -0.08245 |
| C  | 1.45659  | -2.76394 | -0.30232 |
| Cu | -0.21942 | 0.00243  | -0.06939 |

14.  $L^1CuXO_2$   $\eta^1$  singlet, X = oxetane

|   |          |          |          |
|---|----------|----------|----------|
| C | -1.15919 | 2.31417  | -2.69266 |
| C | -0.87665 | 3.52730  | -3.33247 |
| C | 0.40516  | 3.84033  | -3.76951 |
| C | 1.43713  | 2.93018  | -3.56506 |
| C | 1.21410  | 1.70545  | -2.92615 |
| C | -2.59698 | 2.02779  | -2.26334 |
| C | -3.56691 | 1.98794  | -3.46530 |
| C | -3.08871 | 3.05220  | -1.22440 |
| C | 2.37926  | 0.72989  | -2.77521 |
| C | 3.55006  | 1.35470  | -1.99262 |
| C | 2.86730  | 0.21229  | -4.14426 |
| C | 0.46370  | -2.70227 | 1.37753  |
| C | -0.41100 | -2.88806 | 2.47619  |
| C | 0.10618  | -3.44776 | 3.64987  |
| C | 1.44686  | -3.80887 | 3.74738  |
| C | 2.29655  | -3.61260 | 2.66037  |
| C | 1.82959  | -3.06414 | 1.46156  |
| C | -1.88881 | -2.50884 | 2.39358  |
| C | -2.26170 | -1.43401 | 3.42942  |
| C | -2.80728 | -3.74013 | 2.53212  |
| C | 2.79169  | -2.85092 | 0.29333  |
| C | 3.53704  | -4.13961 | -0.10689 |
| C | 3.79049  | -1.71557 | 0.58985  |
| C | 1.35701  | 2.45355  | 1.20803  |
| C | 1.40206  | 2.50092  | 2.74549  |
| C | 1.49588  | 0.96445  | 2.68099  |
| C | -0.93981 | -0.75031 | -4.07024 |
| C | -0.65250 | -0.92219 | -2.58336 |
| C | -0.72954 | -2.25138 | -2.11304 |
| C | -0.37105 | -2.79667 | -0.86525 |
| C | -0.35191 | -4.31509 | -0.78822 |
| C | -0.09871 | 1.39613  | -2.48308 |
| H | -1.06659 | -1.71826 | -4.55777 |
| H | -0.13390 | -0.21038 | -4.57324 |
| H | -1.84999 | -0.16654 | -4.22522 |
| H | -1.02894 | -2.97800 | -2.85770 |
| H | -0.81770 | -4.75606 | -1.67123 |
| H | -0.87488 | -4.67359 | 0.10149  |
| H | 0.67441  | -4.68919 | -0.72172 |
| H | -1.68297 | 4.23685  | -3.49854 |
| H | 0.59746  | 4.78371  | -4.27362 |
| H | 2.43596  | 3.16867  | -3.92160 |
| H | -2.61444 | 1.04933  | -1.77680 |
| H | -4.57393 | 1.71452  | -3.13198 |
| H | -3.26190 | 1.26339  | -4.22628 |
| H | -3.63610 | 2.96423  | -3.95833 |
| H | -4.09495 | 2.79086  | -0.88215 |
| H | -3.12738 | 4.06201  | -1.65018 |
| H | -2.43090 | 3.06475  | -0.35278 |
| H | 2.02278  | -0.13113 | -2.20396 |
| H | 4.37190  | 0.63654  | -1.89734 |
| H | 3.24082  | 1.64368  | -0.98428 |
| H | 3.94579  | 2.24409  | -2.49597 |
| H | 3.67574  | -0.51550 | -4.01151 |
| H | 3.25352  | 1.02666  | -4.76740 |
| H | 2.06623  | -0.28033 | -4.70394 |
| H | -0.55461 | -3.60656 | 4.49841  |
| H | 1.82952  | -4.24513 | 4.66597  |
| H | 3.34307  | -3.89509 | 2.74292  |
| H | -2.06594 | -2.06966 | 1.40884  |
| H | -3.31601 | -1.15823 | 3.32616  |
| H | -1.67150 | -0.52478 | 3.28012  |
| H | -2.10003 | -1.78480 | 4.45522  |

|    |          |          |          |
|----|----------|----------|----------|
| H  | -3.85652 | -3.44850 | 2.41339  |
| H  | -2.70227 | -4.21505 | 3.51416  |
| H  | -2.58613 | -4.49889 | 1.77447  |
| H  | 2.19937  | -2.53470 | -0.56999 |
| H  | 4.14854  | -3.96126 | -0.99874 |
| H  | 2.84663  | -4.95801 | -0.33488 |
| H  | 4.20834  | -4.48588 | 0.68686  |
| H  | 4.46455  | -1.56682 | -0.26170 |
| H  | 4.40769  | -1.94827 | 1.46545  |
| H  | 3.26787  | -0.77266 | 0.77447  |
| H  | 0.43366  | 2.80262  | 0.74175  |
| H  | 2.22223  | 2.87206  | 0.68577  |
| H  | 0.49007  | 2.88021  | 3.20912  |
| H  | 2.26790  | 3.00665  | 3.17563  |
| H  | 2.43931  | 0.52080  | 3.01298  |
| H  | 0.65637  | 0.41047  | 3.10770  |
| N  | -0.32119 | 0.13439  | -1.83870 |
| N  | -0.02664 | -2.06991 | 0.19908  |
| O  | 1.42593  | 0.98479  | 1.21609  |
| O  | -2.63569 | 0.75122  | 0.88243  |
| O  | -1.43214 | 1.21063  | 0.87395  |
| Cu | -0.22198 | -0.09833 | 0.19845  |

15. L<sup>1</sup>CuXO<sub>2</sub> η<sup>1</sup> triplex, X = oxetane

|   |          |          |          |
|---|----------|----------|----------|
| O | -0.09183 | -1.07314 | 2.00052  |
| O | -0.26342 | -0.49356 | 3.08932  |
| C | -0.89166 | -2.98404 | -0.52288 |
| C | 2.92915  | -0.43780 | 3.40412  |
| C | 2.47433  | 1.41638  | -2.41752 |
| C | 2.21258  | 0.10617  | -3.18760 |
| C | 3.15371  | 2.45430  | -3.32894 |
| C | -3.05755 | 0.33102  | -0.30078 |
| C | -3.87188 | -0.15985 | 0.75309  |
| C | -5.03340 | -0.87181 | 0.42987  |
| C | -5.39083 | -1.12254 | -0.89028 |
| C | -4.57757 | -0.65288 | -1.91722 |
| C | -3.41369 | 0.07763  | -1.65241 |
| C | 0.23122  | -4.03750 | -0.47850 |
| C | -3.52162 | 0.05817  | 2.22420  |
| C | -3.41550 | -1.27672 | 2.98800  |
| C | -4.53143 | 0.98565  | 2.92895  |
| C | -2.56028 | 0.56594  | -2.82249 |
| C | -3.37048 | 1.41189  | -3.82335 |
| C | -1.86939 | -0.60717 | -3.54525 |
| C | 1.76486  | 3.89335  | 0.33601  |
| C | 0.78104  | 2.73422  | 0.28870  |
| C | -0.58822 | 3.08932  | 0.26447  |
| C | -1.77233 | 2.33338  | 0.07352  |
| C | 3.39831  | 0.91972  | 1.31148  |
| C | -3.04683 | 3.14736  | -0.09452 |
| C | 2.65021  | 1.21643  | 0.14450  |
| C | 4.75266  | 0.59468  | 1.17404  |
| C | 5.36400  | 0.53651  | -0.07453 |
| C | 4.61535  | 0.80776  | -1.21562 |
| C | 3.26252  | 1.15367  | -1.13460 |
| C | 2.76525  | 0.92532  | 2.70179  |
| C | 1.19319  | -2.83465 | -0.44759 |
| C | 3.32463  | 2.05182  | 3.59182  |
| H | 1.64686  | -2.63306 | 0.52755  |
| H | 0.24626  | -4.68868 | 0.39732  |
| H | 1.95005  | -2.76565 | -1.23293 |
| H | -1.43837 | -2.85191 | 0.41528  |
| H | -1.59233 | -3.01746 | -1.36040 |

S23

|    |          |          |          |
|----|----------|----------|----------|
| H  | 0.30636  | -4.64246 | -1.38442 |
| H  | 1.25638  | 4.83544  | 0.54644  |
| H  | 2.28582  | 3.99345  | -0.62267 |
| H  | 2.53496  | 3.73139  | 1.09436  |
| H  | -0.76120 | 4.15641  | 0.33215  |
| H  | -2.89479 | 4.18694  | 0.19969  |
| H  | -3.86966 | 2.73159  | 0.49131  |
| H  | -3.36955 | 3.13429  | -1.14140 |
| H  | 5.33706  | 0.37607  | 2.06414  |
| H  | 6.41547  | 0.27557  | -0.15882 |
| H  | 5.09195  | 0.75025  | -2.19106 |
| H  | 1.69398  | 1.10503  | 2.57676  |
| H  | 2.82740  | 2.05123  | 4.56846  |
| H  | 3.17341  | 3.03768  | 3.14127  |
| H  | 4.39949  | 1.92797  | 3.76589  |
| H  | 2.37927  | -0.45021 | 4.35145  |
| H  | 3.98054  | -0.65224 | 3.62656  |
| H  | 2.54550  | -1.25433 | 2.78512  |
| H  | 1.49901  | 1.81895  | -2.13217 |
| H  | 1.63198  | 0.29937  | -4.09753 |
| H  | 1.64654  | -0.60188 | -2.57448 |
| H  | 3.15198  | -0.37435 | -3.48510 |
| H  | 2.51338  | 2.68195  | -4.18864 |
| H  | 4.11112  | 2.09289  | -3.72053 |
| H  | 3.34757  | 3.39102  | -2.79619 |
| H  | -5.66775 | -1.24039 | 1.23206  |
| H  | -6.29548 | -1.68011 | -1.11750 |
| H  | -4.85445 | -0.85380 | -2.94914 |
| H  | -2.54212 | 0.54119  | 2.26420  |
| H  | -3.06370 | -1.10543 | 4.01112  |
| H  | -2.71279 | -1.96084 | 2.50328  |
| H  | -4.38513 | -1.78345 | 3.05117  |
| H  | -4.24125 | 1.14547  | 3.97374  |
| H  | -5.53906 | 0.55408  | 2.92623  |
| H  | -4.59008 | 1.96576  | 2.44623  |
| H  | -1.77063 | 1.20160  | -2.41443 |
| H  | -2.71202 | 1.82054  | -4.59820 |
| H  | -3.87156 | 2.25101  | -3.33032 |
| H  | -4.14170 | 0.81878  | -4.32761 |
| H  | -1.25860 | -0.24137 | -4.37895 |
| H  | -2.60417 | -1.31039 | -3.95424 |
| H  | -1.21087 | -1.15401 | -2.86432 |
| N  | 1.25149  | 1.48738  | 0.23403  |
| N  | -1.82990 | 1.00494  | -0.00990 |
| O  | 0.08786  | -1.90665 | -0.70323 |
| Cu | -0.08303 | 0.05254  | 0.18393  |

16.  $L^1CuXO_2$   $\eta^2$  singlet, X = oxetane

|   |          |          |          |
|---|----------|----------|----------|
| C | -1.08651 | 2.38970  | -2.70805 |
| C | 3.64681  | 1.48783  | -1.91800 |
| C | 2.89659  | 0.09754  | -3.89121 |
| C | 0.43195  | -2.56277 | 1.45278  |
| C | -0.39962 | -2.88270 | 2.56212  |
| C | 0.20251  | -3.39873 | 3.71653  |
| C | 1.57483  | -3.60631 | 3.79810  |
| C | 2.37695  | -3.30796 | 2.70490  |
| C | 1.83600  | -2.79089 | 1.52260  |
| C | -1.91995 | -2.73074 | 2.53762  |
| C | -2.42565 | -1.76868 | 3.62794  |
| C | -0.76018 | 3.59562  | -3.34081 |
| C | -2.63409 | -4.09508 | 2.67456  |
| C | 2.77838  | -2.50674 | 0.35305  |
| C | 3.54355  | -3.77017 | -0.08985 |

|   |          |          |          |
|---|----------|----------|----------|
| C | 3.77389  | -1.38004 | 0.68744  |
| C | 1.52989  | 2.52426  | 1.23262  |
| C | 2.46819  | 2.30234  | 2.43676  |
| C | 1.71967  | 0.96391  | 2.61127  |
| C | -0.83857 | -0.73100 | -4.05283 |
| C | -0.61993 | -0.88357 | -2.55795 |
| C | -0.75874 | -2.19453 | -2.05758 |
| C | 0.54062  | 3.88934  | -3.72499 |
| C | -0.44374 | -2.71146 | -0.78693 |
| C | -0.44799 | -4.22396 | -0.66605 |
| C | -0.04789 | 1.44734  | -2.46474 |
| C | 1.55246  | 2.97029  | -3.46962 |
| C | 1.29120  | 1.75238  | -2.83315 |
| C | -2.54809 | 2.14956  | -2.33689 |
| C | -3.45865 | 2.10398  | -3.58531 |
| C | -3.07463 | 3.23128  | -1.37494 |
| C | 2.44604  | 0.78828  | -2.58822 |
| H | -0.80907 | -1.70008 | -4.55200 |
| H | -0.09829 | -0.07114 | -4.51015 |
| H | -1.81895 | -0.28405 | -4.23702 |
| H | -1.05068 | -2.93387 | -2.79202 |
| H | -0.94027 | -4.67845 | -1.52708 |
| H | -0.95511 | -4.54746 | 0.24504  |
| H | 0.57291  | -4.61236 | -0.61525 |
| H | -1.54861 | 4.31675  | -3.53888 |
| H | 0.76571  | 4.82860  | -4.22272 |
| H | 2.56863  | 3.20166  | -3.77684 |
| H | -2.61266 | 1.19247  | -1.81510 |
| H | -4.48450 | 1.85083  | -3.29598 |
| H | -3.12897 | 1.36841  | -4.32355 |
| H | -3.48663 | 3.07715  | -4.08951 |
| H | -4.08855 | 2.97887  | -1.04817 |
| H | -3.12017 | 4.21188  | -1.86304 |
| H | -2.44392 | 3.31772  | -0.48831 |
| H | 2.09168  | 0.01292  | -1.90473 |
| H | 4.44180  | 0.76253  | -1.71571 |
| H | 3.36336  | 1.95294  | -0.96845 |
| H | 4.07704  | 2.26722  | -2.55668 |
| H | 3.70820  | -0.61059 | -3.68877 |
| H | 3.26552  | 0.83316  | -4.61469 |
| H | 2.08182  | -0.45604 | -4.36722 |
| H | -0.42174 | -3.65123 | 4.56865  |
| H | 2.01658  | -4.00756 | 4.70620  |
| H | 3.44777  | -3.48744 | 2.76607  |
| H | -2.19947 | -2.29954 | 1.57309  |
| H | -3.50749 | -1.62346 | 3.53419  |
| H | -1.94962 | -0.78881 | 3.54526  |
| H | -2.23091 | -2.16757 | 4.62926  |
| H | -3.71937 | -3.95940 | 2.60499  |
| H | -2.42005 | -4.56878 | 3.64024  |
| H | -2.33537 | -4.79806 | 1.89110  |
| H | 2.17614  | -2.16199 | -0.49019 |
| H | 4.14239  | -3.56061 | -0.98334 |
| H | 2.86997  | -4.59923 | -0.32580 |
| H | 4.22653  | -4.11674 | 0.69380  |
| H | 4.46448  | -1.21897 | -0.14740 |
| H | 4.37726  | -1.62121 | 1.56990  |
| H | 3.25060  | -0.43872 | 0.87835  |
| H | 0.75211  | 3.28033  | 1.37933  |
| H | 1.99688  | 2.66450  | 0.25227  |
| H | 2.36307  | 3.01568  | 3.25653  |
| H | 3.52414  | 2.20073  | 2.17703  |
| H | 2.31186  | 0.04602  | 2.56866  |
| H | 1.03808  | 0.92059  | 3.46733  |



|    |          |          |          |
|----|----------|----------|----------|
| N  | -0.32307 | 0.19179  | -1.82457 |
| N  | -0.11088 | -1.96603 | 0.26626  |
| O  | 0.98031  | 1.18405  | 1.37641  |
| O  | -1.71011 | 0.40070  | 1.56795  |
| O  | -1.69844 | 1.34639  | 0.62708  |
| Cu | -0.45325 | -0.04910 | 0.13167  |

17.  $L^1CuXO_2$   $\eta^2$  triplet, X = oxetane

|   |          |          |          |
|---|----------|----------|----------|
| C | 0.30806  | -1.35615 | 4.12159  |
| C | 1.49644  | 1.06030  | -2.08233 |
| C | -2.70904 | -3.04361 | -4.16468 |
| C | -1.84713 | -4.33475 | -2.16752 |
| C | -2.82689 | 1.19503  | 0.25204  |
| C | -3.40147 | 1.42955  | 1.65929  |
| C | -3.11752 | 2.42956  | -0.62627 |
| C | 2.72265  | 0.72313  | -0.03817 |
| C | 3.83660  | -0.14400 | 0.10614  |
| C | 4.83490  | 0.19204  | 1.02865  |
| C | 4.74636  | 1.34083  | 1.80811  |
| C | 3.64116  | 2.17499  | 1.67365  |
| C | 2.58658  | 2.00174  | -2.56976 |
| C | 2.61626  | 1.89387  | 0.76299  |
| C | 3.98903  | -1.40618 | -0.73922 |
| C | 4.35142  | -2.64294 | 0.10245  |
| C | 5.02213  | -1.19848 | -1.86377 |
| C | 1.41476  | 2.84054  | 0.70422  |
| C | 1.82777  | 4.29889  | 0.42054  |
| C | 0.58647  | 2.77585  | 2.00527  |
| C | -0.77501 | -1.15422 | 3.04571  |
| C | 1.29202  | -0.86940 | 3.03774  |
| C | -2.50029 | -0.84395 | -1.28354 |
| C | -1.99296 | 0.68533  | -3.65359 |
| C | -0.91563 | 0.40805  | -2.61471 |
| C | 0.33936  | 0.99869  | -2.88064 |
| C | -2.95549 | -2.06865 | -1.83198 |
| C | -4.24850 | -2.50272 | -1.51040 |
| C | -5.07390 | -1.76689 | -0.66878 |
| C | -4.60547 | -0.58002 | -0.11242 |
| C | -3.32137 | -0.10226 | -0.39095 |
| C | -2.09282 | -2.92778 | -2.75412 |
| H | 0.45053  | -2.38069 | 4.46777  |
| H | 1.87052  | 0.02953  | 3.25476  |
| H | 0.21722  | -0.68849 | 4.98033  |
| H | -1.57128 | -0.44047 | 3.28175  |
| H | -1.87321 | 1.68691  | -4.07351 |
| H | -2.99857 | 0.58917  | -3.24374 |
| H | -1.90005 | -0.03029 | -4.47819 |
| H | 0.38611  | 1.57304  | -3.79842 |
| H | 2.56178  | 2.07345  | -3.65905 |
| H | 3.57890  | 1.67255  | -2.25581 |
| H | 2.43509  | 3.01057  | -2.17109 |
| H | -4.61280 | -3.43707 | -1.92864 |
| H | -6.07555 | -2.11963 | -0.43719 |
| H | -5.25021 | -0.01972 | 0.55732  |
| H | -1.12021 | -2.43500 | -2.85108 |
| H | -2.03923 | -3.59807 | -4.83152 |
| H | -2.89651 | -2.06103 | -4.61068 |
| H | -3.66505 | -3.58119 | -4.13854 |
| H | -1.18212 | -4.90835 | -2.82316 |
| H | -2.78366 | -4.89848 | -2.07624 |
| H | -1.38636 | -4.27910 | -1.17860 |
| H | -1.73918 | 1.10925  | 0.34990  |
| H | -2.86306 | 2.24774  | 2.15133  |

|    |          |          |          |
|----|----------|----------|----------|
| H  | -3.31689 | 0.53953  | 2.28800  |
| H  | -4.45837 | 1.71465  | 1.62757  |
| H  | -2.77189 | 3.34267  | -0.12652 |
| H  | -4.19396 | 2.53116  | -0.80656 |
| H  | -2.61798 | 2.37325  | -1.59503 |
| H  | 5.69841  | -0.45837 | 1.13672  |
| H  | 5.53216  | 1.58370  | 2.51881  |
| H  | 3.56999  | 3.06580  | 2.29322  |
| H  | 3.02326  | -1.60334 | -1.21285 |
| H  | 4.34392  | -3.54073 | -0.52578 |
| H  | 3.63585  | -2.79794 | 0.91369  |
| H  | 5.35168  | -2.56205 | 0.54327  |
| H  | 5.10507  | -2.09883 | -2.48332 |
| H  | 6.01435  | -0.98144 | -1.45108 |
| H  | 4.74137  | -0.36560 | -2.51622 |
| H  | 0.76197  | 2.51647  | -0.11101 |
| H  | 0.93774  | 4.92455  | 0.28480  |
| H  | 2.44374  | 4.38699  | -0.47987 |
| H  | 2.40048  | 4.72697  | 1.25121  |
| H  | -0.29211 | 3.42949  | 1.93094  |
| H  | 1.17738  | 3.11563  | 2.86523  |
| H  | 0.24515  | 1.75578  | 2.19981  |
| H  | -1.21060 | -2.07179 | 2.63758  |
| H  | 1.94890  | -1.63914 | 2.62823  |
| N  | -1.18042 | -0.36162 | -1.56181 |
| N  | 1.66783  | 0.38228  | -0.94627 |
| O  | 0.19626  | -0.57832 | 2.12220  |
| O  | 1.08914  | -2.80189 | 0.41915  |
| O  | -0.19299 | -2.76983 | 0.22697  |
| Cu | 0.34150  | -0.96697 | -0.44312 |

18. L<sup>1</sup>CuX, X = methyloxirane

|   |          |          |          |
|---|----------|----------|----------|
| C | 1.20676  | -4.50552 | -0.55277 |
| C | -1.11342 | -3.34261 | -0.26959 |
| C | 3.16876  | 0.64287  | 1.50215  |
| C | 4.52122  | 0.29454  | 1.57509  |
| C | 5.30253  | 0.18140  | 0.42757  |
| C | 4.72639  | 0.40542  | -0.82009 |
| C | 3.37778  | 0.75702  | -0.94456 |
| C | 2.30343  | 0.66528  | 2.75746  |
| C | 2.99482  | 1.30554  | 3.97132  |
| C | 1.82210  | -0.76111 | 3.09334  |
| C | 2.73953  | 0.90149  | -2.32198 |
| C | 2.35973  | -0.48634 | -2.87482 |
| C | 3.61108  | 1.66691  | -3.32977 |
| C | -3.00303 | -0.18893 | -0.26734 |
| C | -3.61059 | -0.75625 | 0.88079  |
| C | -4.66305 | -1.66267 | 0.70857  |
| C | -5.12211 | -2.01062 | -0.55862 |
| C | -4.52903 | -1.43722 | -1.68213 |
| C | -3.47579 | -0.52366 | -1.56375 |
| C | -3.11397 | -0.43112 | 2.28683  |
| C | -2.38746 | -1.63448 | 2.91735  |
| C | -4.24566 | 0.06306  | 3.20473  |
| C | -2.80375 | 0.04348  | -2.81146 |
| C | -3.79700 | 0.41314  | -3.92431 |
| C | -1.73169 | -0.92838 | -3.34142 |
| C | 1.67510  | 3.55752  | 0.26575  |
| C | 0.70750  | 2.39124  | 0.14514  |
| C | -0.66658 | 2.72232  | 0.06122  |
| C | -1.82586 | 1.91988  | -0.06027 |
| C | -3.15780 | 2.65094  | -0.10429 |
| C | 2.59824  | 0.89024  | 0.22976  |

|    |          |          |          |
|----|----------|----------|----------|
| H  | 0.27874  | -3.04970 | -1.93132 |
| H  | 2.22377  | -4.10899 | -0.63566 |
| H  | 1.11961  | -5.36539 | -1.22609 |
| H  | 1.05058  | -4.84726 | 0.47344  |
| H  | -1.95058 | -2.88460 | -0.78754 |
| H  | -1.36588 | -4.03231 | 0.53205  |
| H  | 1.14739  | 4.51193  | 0.28938  |
| H  | 2.37667  | 3.56815  | -0.57524 |
| H  | 2.28029  | 3.46994  | 1.17385  |
| H  | -0.86757 | 3.78587  | 0.10007  |
| H  | -3.02373 | 3.73144  | -0.03668 |
| H  | -3.80182 | 2.32799  | 0.72064  |
| H  | -3.69896 | 2.42490  | -1.02909 |
| H  | 4.97055  | 0.10134  | 2.54479  |
| H  | 6.35204  | -0.08811 | 0.50505  |
| H  | 5.33508  | 0.29893  | -1.71326 |
| H  | 1.41344  | 1.26032  | 2.53396  |
| H  | 2.28932  | 1.39056  | 4.80487  |
| H  | 3.36700  | 2.30828  | 3.73784  |
| H  | 3.84213  | 0.70852  | 4.32562  |
| H  | 1.15281  | -0.75284 | 3.96143  |
| H  | 2.67293  | -1.41207 | 3.32584  |
| H  | 1.28122  | -1.20619 | 2.25193  |
| H  | 1.80943  | 1.46272  | -2.19760 |
| H  | 1.84864  | -0.39955 | -3.84058 |
| H  | 1.69133  | -1.00720 | -2.18132 |
| H  | 3.25154  | -1.10829 | -3.01403 |
| H  | 3.05708  | 1.83090  | -4.26037 |
| H  | 4.52200  | 1.11649  | -3.58859 |
| H  | 3.91159  | 2.64340  | -2.93692 |
| H  | -5.12876 | -2.10718 | 1.58409  |
| H  | -5.93838 | -2.71830 | -0.67178 |
| H  | -4.89188 | -1.70797 | -2.66944 |
| H  | -2.38198 | 0.37612  | 2.19742  |
| H  | -2.01459 | -1.38106 | 3.91615  |
| H  | -1.53238 | -1.94033 | 2.30790  |
| H  | -3.05866 | -2.49528 | 3.01918  |
| H  | -3.84368 | 0.36197  | 4.17882  |
| H  | -4.99398 | -0.71677 | 3.38351  |
| H  | -4.76273 | 0.92522  | 2.77156  |
| H  | -2.28166 | 0.95790  | -2.51763 |
| H  | -3.27593 | 0.93035  | -4.73677 |
| H  | -4.58744 | 1.07256  | -3.55225 |
| H  | -4.27660 | -0.47042 | -4.35910 |
| H  | -1.23096 | -0.51746 | -4.22523 |
| H  | -2.17647 | -1.89132 | -3.61908 |
| H  | -0.96719 | -1.10860 | -2.57913 |
| N  | 1.20092  | 1.15209  | 0.12531  |
| N  | -1.82256 | 0.58987  | -0.13014 |
| O  | -0.03636 | -2.42787 | 0.07607  |
| C  | 0.19725  | -3.45574 | -0.92462 |
| Cu | -0.06579 | -0.30308 | -0.01331 |

19.  $L^1CuXO_2$   $\eta^1$  singlet, X = methyloxirane

|   |          |         |          |
|---|----------|---------|----------|
| C | 2.11975  | 1.86786 | 1.97664  |
| C | 1.51106  | 1.52564 | 3.31042  |
| C | 1.39606  | 2.61756 | 0.94053  |
| C | -1.14362 | 2.30023 | -2.48912 |
| C | -0.82264 | 3.56480 | -2.99696 |
| C | 0.47054  | 3.87499 | -3.40512 |
| C | 1.47298  | 2.91579 | -3.29545 |
| C | 1.21231  | 1.63731 | -2.78834 |
| C | -2.58170 | 2.00833 | -2.07014 |

|   |          |          |          |
|---|----------|----------|----------|
| C | -3.50725 | 1.88517  | -3.29714 |
| C | -3.13207 | 3.06471  | -1.09339 |
| C | 2.35683  | 0.62649  | -2.69739 |
| C | 3.58530  | 1.19350  | -1.96192 |
| C | 2.77315  | 0.11030  | -4.09031 |
| C | 0.38529  | -2.75462 | 1.29611  |
| C | -0.47743 | -2.94245 | 2.40820  |
| C | 0.05381  | -3.48278 | 3.58422  |
| C | 1.40114  | -3.81099 | 3.68803  |
| C | 2.24537  | -3.59405 | 2.60345  |
| C | 1.76897  | -3.06753 | 1.39880  |
| C | -1.96176 | -2.58923 | 2.35219  |
| C | -2.37539 | -1.63950 | 3.49200  |
| C | -2.84176 | -3.85369 | 2.35148  |
| C | 2.76340  | -2.81271 | 0.26603  |
| C | 3.58043  | -4.06715 | -0.10116 |
| C | 3.70831  | -1.64688 | 0.62073  |
| C | -0.80525 | -0.82152 | -4.18835 |
| C | -0.59219 | -1.03109 | -2.69580 |
| C | -0.64741 | -2.37196 | -2.26253 |
| C | -0.35474 | -2.91092 | -0.99590 |
| C | -0.26226 | -4.42425 | -0.90941 |
| C | -0.12113 | 1.32147  | -2.40600 |
| H | 1.85489  | 0.54225  | 3.64929  |
| H | 1.80876  | 2.26509  | 4.06313  |
| H | 1.94177  | 3.20878  | 0.20701  |
| H | 0.36647  | 2.91435  | 1.12425  |
| H | 3.21018  | 1.91863  | 1.95613  |
| H | 0.42096  | 1.50930  | 3.24290  |
| H | -0.37983 | -1.64949 | -4.76021 |
| H | -0.37740 | 0.11563  | -4.54344 |
| H | -1.88106 | -0.79467 | -4.39727 |
| H | -0.85288 | -3.09795 | -3.03985 |
| H | -0.78872 | -4.88943 | -1.74483 |
| H | -0.68115 | -4.79497 | 0.02909  |
| H | 0.78223  | -4.75026 | -0.94704 |
| H | -1.60202 | 4.31705  | -3.07759 |
| H | 0.69801  | 4.86048  | -3.80251 |
| H | 2.48245  | 3.16492  | -3.61002 |
| H | -2.58851 | 1.04529  | -1.55072 |
| H | -4.52531 | 1.62606  | -2.98560 |
| H | -3.15926 | 1.11554  | -3.99270 |
| H | -3.55678 | 2.83117  | -3.84864 |
| H | -4.12840 | 2.77128  | -0.74651 |
| H | -3.22449 | 4.04843  | -1.56749 |
| H | -2.49364 | 3.16798  | -0.21312 |
| H | 1.99701  | -0.22621 | -2.11552 |
| H | 4.35718  | 0.42158  | -1.87148 |
| H | 3.31672  | 1.52001  | -0.95543 |
| H | 4.03422  | 2.03711  | -2.49747 |
| H | 3.57201  | -0.63462 | -3.99942 |
| H | 3.15095  | 0.92812  | -4.71491 |
| H | 1.94017  | -0.35603 | -4.62306 |
| H | -0.60094 | -3.64707 | 4.43542  |
| H | 1.79412  | -4.22738 | 4.61161  |
| H | 3.30093  | -3.83559 | 2.69518  |
| H | -2.14595 | -2.06369 | 1.41087  |
| H | -3.41159 | -1.31375 | 3.35494  |
| H | -1.74557 | -0.74643 | 3.51089  |
| H | -2.30473 | -2.12328 | 4.47266  |
| H | -3.90206 | -3.58429 | 2.29191  |
| H | -2.69476 | -4.43937 | 3.26637  |
| H | -2.61139 | -4.50338 | 1.50087  |
| H | 2.20095  | -2.51434 | -0.62223 |

|    |          |          |          |
|----|----------|----------|----------|
| H  | 4.20062  | -3.87068 | -0.98286 |
| H  | 2.93799  | -4.92476 | -0.32525 |
| H  | 4.25448  | -4.36491 | 0.70954  |
| H  | 4.41545  | -1.46409 | -0.19673 |
| H  | 4.29236  | -1.87261 | 1.52061  |
| H  | 3.14718  | -0.72579 | 0.79634  |
| N  | -0.41045 | 0.01567  | -1.89377 |
| N  | -0.13233 | -2.18099 | 0.09507  |
| O  | 1.58071  | 1.18921  | 0.81713  |
| O  | -2.58946 | 1.01960  | 1.35482  |
| O  | -1.31576 | 0.98722  | 1.20950  |
| Cu | -0.54081 | -0.27327 | 0.06723  |

20.  $L^1CuXO_2$   $\eta^1$  triplet, X = methyloxirane

|   |          |          |          |
|---|----------|----------|----------|
| C | 1.99004  | 1.33319  | 2.32900  |
| C | 1.15321  | 0.79999  | 3.45914  |
| C | 1.52034  | 2.38191  | 1.41211  |
| C | -1.27985 | 2.26940  | -2.68228 |
| C | -1.06857 | 3.51257  | -3.29058 |
| C | 0.17761  | 3.87743  | -3.78958 |
| C | 1.24362  | 2.99064  | -3.67838 |
| C | 1.08664  | 1.73039  | -3.09183 |
| C | -2.66151 | 1.94424  | -2.11526 |
| C | -3.71333 | 1.73371  | -3.22268 |
| C | -3.14527 | 3.03306  | -1.13618 |
| C | 2.29803  | 0.80269  | -2.99123 |
| C | 3.38048  | 1.38996  | -2.06430 |
| C | 2.89946  | 0.47415  | -4.37163 |
| C | 0.41981  | -2.70595 | 1.39873  |
| C | -0.48320 | -2.81715 | 2.48901  |
| C | -0.01550 | -3.34400 | 3.69814  |
| C | 1.31039  | -3.73550 | 3.85568  |
| C | 2.19235  | -3.60490 | 2.78695  |
| C | 1.77399  | -3.09961 | 1.55001  |
| C | -1.94769 | -2.39713 | 2.36972  |
| C | -2.38722 | -1.45753 | 3.50857  |
| C | -2.88508 | -3.61991 | 2.30306  |
| C | 2.79222  | -2.96396 | 0.41867  |
| C | 3.53241  | -4.28650 | 0.13680  |
| C | 3.80104  | -1.83393 | 0.70492  |
| C | -0.89663 | -0.87993 | -4.16153 |
| C | -0.64486 | -1.00164 | -2.66631 |
| C | -0.70792 | -2.31484 | -2.14170 |
| C | -0.37693 | -2.83841 | -0.87197 |
| C | -0.39974 | -4.35431 | -0.75725 |
| C | -0.19408 | 1.36068  | -2.60305 |
| H | 1.31743  | -0.27361 | 3.59084  |
| H | 1.43108  | 1.30370  | 4.39157  |
| H | 2.23016  | 3.03439  | 0.90793  |
| H | 0.51279  | 2.77397  | 1.52918  |
| H | 3.06860  | 1.22989  | 2.44955  |
| H | 0.09098  | 0.97208  | 3.27326  |
| H | -1.27106 | -1.81729 | -4.57581 |
| H | 0.02891  | -0.61997 | -4.68567 |
| H | -1.61286 | -0.08542 | -4.38261 |
| H | -0.99605 | -3.06630 | -2.86656 |
| H | -1.00366 | -4.79747 | -1.55111 |
| H | -0.78953 | -4.68040 | 0.20942  |
| H | 0.61509  | -4.75717 | -0.84318 |
| H | -1.89798 | 4.21035  | -3.36963 |
| H | 0.31849  | 4.84867  | -4.25619 |
| H | 2.22021  | 3.28107  | -4.05756 |
| H | -2.57736 | 1.00980  | -1.55412 |

S30

|    |          |          |          |
|----|----------|----------|----------|
| H  | -4.68910 | 1.49687  | -2.78341 |
| H  | -3.44425 | 0.91310  | -3.89426 |
| H  | -3.83312 | 2.63632  | -3.83288 |
| H  | -4.06922 | 2.71571  | -0.64073 |
| H  | -3.35501 | 3.97562  | -1.65429 |
| H  | -2.40094 | 3.23343  | -0.36128 |
| H  | 1.96370  | -0.13685 | -2.54370 |
| H  | 4.24130  | 0.71384  | -2.00250 |
| H  | 2.99228  | 1.53109  | -1.05250 |
| H  | 3.74286  | 2.35581  | -2.43504 |
| H  | 3.71218  | -0.25401 | -4.26968 |
| H  | 3.31595  | 1.36556  | -4.85379 |
| H  | 2.15289  | 0.05068  | -5.05095 |
| H  | -0.70338 | -3.44639 | 4.53308  |
| H  | 1.65443  | -4.13808 | 4.80468  |
| H  | 3.22973  | -3.90359 | 2.91489  |
| H  | -2.05743 | -1.84562 | 1.43231  |
| H  | -3.40552 | -1.09724 | 3.32823  |
| H  | -1.73388 | -0.58345 | 3.58310  |
| H  | -2.38528 | -1.96237 | 4.48120  |
| H  | -3.92774 | -3.29922 | 2.19631  |
| H  | -2.81191 | -4.22315 | 3.21541  |
| H  | -2.64743 | -4.26881 | 1.45495  |
| H  | 2.24964  | -2.68583 | -0.48882 |
| H  | 4.17801  | -4.18277 | -0.74248 |
| H  | 2.83595  | -5.11000 | -0.05040 |
| H  | 4.17013  | -4.58125 | 0.97769  |
| H  | 4.52648  | -1.74783 | -0.11225 |
| H  | 4.36049  | -2.02630 | 1.62784  |
| H  | 3.29257  | -0.87122 | 0.80547  |
| N  | -0.35150 | 0.09071  | -1.96251 |
| N  | -0.01942 | -2.10349 | 0.18072  |
| O  | 1.57544  | 1.00147  | 0.97119  |
| O  | -2.49397 | 0.77387  | 1.04843  |
| O  | -1.30118 | 1.17028  | 0.96289  |
| Cu | -0.07352 | -0.13084 | -0.00563 |

21.  $L^1CuXO_2$   $\eta^2$  singlet, X = methyloxirane

|   |          |          |          |
|---|----------|----------|----------|
| C | 1.95584  | 2.45341  | 1.20470  |
| C | 2.06453  | 0.90000  | 3.29192  |
| C | 2.66664  | 1.47688  | 2.03783  |
| C | -1.43150 | 2.07921  | -2.74141 |
| C | -1.32836 | 3.36255  | -3.29112 |
| C | -0.09740 | 3.90758  | -3.63540 |
| C | 1.06601  | 3.17300  | -3.42351 |
| C | 1.02713  | 1.89049  | -2.86699 |
| C | -2.81651 | 1.53434  | -2.39538 |
| C | -3.72047 | 1.44609  | -3.64246 |
| C | -3.50484 | 2.36919  | -1.29677 |
| C | 2.32398  | 1.10737  | -2.65217 |
| C | 3.49955  | 1.98825  | -2.19612 |
| C | 2.73268  | 0.31871  | -3.91322 |
| C | 0.24629  | -2.52709 | 1.45044  |
| C | -0.72448 | -2.54254 | 2.48563  |
| C | -0.33102 | -2.97646 | 3.75537  |
| C | 0.97723  | -3.37508 | 4.01221  |
| C | 1.91671  | -3.35848 | 2.98665  |
| C | 1.57900  | -2.94346 | 1.69267  |
| C | -2.18136 | -2.15475 | 2.23543  |
| C | -2.76238 | -1.23825 | 3.32706  |
| C | -3.06359 | -3.40806 | 2.06133  |
| C | 2.65469  | -2.95625 | 0.60646  |
| C | 3.29978  | -4.34850 | 0.45509  |

|                                                   |          |          |          |
|---------------------------------------------------|----------|----------|----------|
| C                                                 | 3.73686  | -1.88845 | 0.86000  |
| C                                                 | -0.76969 | -0.92622 | -4.19159 |
| C                                                 | -0.51834 | -1.05976 | -2.69899 |
| C                                                 | -0.57668 | -2.36887 | -2.18874 |
| C                                                 | -0.35247 | -2.81956 | -0.87672 |
| C                                                 | -0.36158 | -4.32573 | -0.68111 |
| C                                                 | -0.24031 | 1.33933  | -2.54215 |
| H                                                 | 0.97529  | 0.91150  | 3.22395  |
| H                                                 | 2.39049  | -0.13372 | 3.44496  |
| H                                                 | 2.38220  | 1.48742  | 4.16124  |
| H                                                 | 0.93997  | 2.74057  | 1.45954  |
| H                                                 | 3.75795  | 1.49482  | 2.00198  |
| H                                                 | 2.51702  | 3.17553  | 0.61344  |
| H                                                 | -0.38633 | -1.80045 | -4.72299 |
| H                                                 | -0.31670 | -0.02682 | -4.60737 |
| H                                                 | -1.84809 | -0.87278 | -4.37622 |
| H                                                 | -0.78084 | -3.14329 | -2.91826 |
| H                                                 | -1.07581 | -4.78755 | -1.36679 |
| H                                                 | -0.61788 | -4.60248 | 0.34220  |
| H                                                 | 0.62658  | -4.74322 | -0.90130 |
| H                                                 | -2.23241 | 3.94333  | -3.45257 |
| H                                                 | -0.04236 | 4.90445  | -4.06461 |
| H                                                 | 2.02335  | 3.60844  | -3.69151 |
| H                                                 | -2.69109 | 0.52139  | -2.00289 |
| H                                                 | -4.67378 | 0.96868  | -3.38968 |
| H                                                 | -3.25474 | 0.86863  | -4.44722 |
| H                                                 | -3.94746 | 2.44101  | -4.04227 |
| H                                                 | -4.48586 | 1.94292  | -1.05667 |
| H                                                 | -3.66580 | 3.40301  | -1.62336 |
| H                                                 | -2.90096 | 2.38216  | -0.38711 |
| H                                                 | 2.13744  | 0.38419  | -1.85355 |
| H                                                 | 4.35146  | 1.35683  | -1.92244 |
| H                                                 | 3.23412  | 2.58874  | -1.32425 |
| H                                                 | 3.84075  | 2.66487  | -2.98793 |
| H                                                 | 3.66890  | -0.22362 | -3.73753 |
| H                                                 | 2.89094  | 0.99570  | -4.76064 |
| H                                                 | 1.97556  | -0.41294 | -4.20505 |
| H                                                 | -1.06189 | -3.00133 | 4.55792  |
| H                                                 | 1.26216  | -3.70125 | 5.00880  |
| H                                                 | 2.93560  | -3.67436 | 3.19345  |
| H                                                 | -2.21767 | -1.59400 | 1.29859  |
| H                                                 | -3.76312 | -0.90252 | 3.03426  |
| H                                                 | -2.13915 | -0.35248 | 3.46816  |
| H                                                 | -2.86293 | -1.75155 | 4.29003  |
| H                                                 | -4.10123 | -3.12020 | 1.85738  |
| H                                                 | -3.05797 | -4.02182 | 2.96951  |
| H                                                 | -2.72087 | -4.03537 | 1.23259  |
| H                                                 | 2.18060  | -2.70644 | -0.34609 |
| H                                                 | 3.97961  | -4.36072 | -0.40396 |
| H                                                 | 2.55022  | -5.13212 | 0.30631  |
| H                                                 | 3.88699  | -4.61973 | 1.33922  |
| H                                                 | 4.50872  | -1.93733 | 0.08310  |
| H                                                 | 4.23009  | -2.04575 | 1.82627  |
| H                                                 | 3.30893  | -0.88399 | 0.84941  |
| N                                                 | -0.29417 | 0.02713  | -1.96332 |
| N                                                 | -0.11964 | -2.02110 | 0.16213  |
| O                                                 | 2.08492  | 1.08307  | 0.76795  |
| O                                                 | -0.84316 | 0.63524  | 1.61496  |
| O                                                 | -0.91718 | 1.52745  | 0.60263  |
| Cu                                                | -0.28206 | -0.11389 | -0.03702 |
| 22. $L^1CuXO_2 \eta^2$ triplet, X = methyloxirane |          |          |          |
| C                                                 | 1.50633  | 0.98422  | -2.04989 |
| C                                                 | 2.59154  | 1.92659  | -2.54750 |
| C                                                 | -2.47422 | -0.91632 | -1.21485 |

|   |          |          |          |
|---|----------|----------|----------|
| C | -2.97532 | -2.12693 | -1.75553 |
| C | -4.26675 | -2.53541 | -1.39807 |
| C | -5.04920 | -1.78576 | -0.52700 |
| C | -4.53843 | -0.61094 | 0.01673  |
| C | -3.25249 | -0.15945 | -0.29873 |
| C | -2.16743 | -2.99043 | -2.72148 |
| C | -2.81051 | -3.02015 | -4.12314 |
| C | -1.98011 | -4.42716 | -2.19461 |
| C | -2.72777 | 1.13562  | 0.32148  |
| C | -3.09200 | 1.27743  | 1.81054  |
| C | -3.21665 | 2.37776  | -0.45283 |
| C | 2.71347  | 0.67520  | 0.01052  |
| C | 3.82622  | -0.18185 | 0.21386  |
| C | 4.79255  | 0.17994  | 1.15903  |
| C | 4.67969  | 1.35018  | 1.90207  |
| C | 3.58186  | 2.18054  | 1.70376  |
| C | 2.58503  | 1.87123  | 0.77068  |
| C | 4.02909  | -1.45303 | -0.60530 |
| C | 4.38926  | -2.67033 | 0.26594  |
| C | 5.09454  | -1.23788 | -1.69960 |
| C | 1.39643  | 2.82801  | 0.64221  |
| C | 1.83792  | 4.27388  | 0.33297  |
| C | 0.52092  | 2.80936  | 1.91185  |
| C | -0.65757 | -1.56380 | 2.93137  |
| C | 0.76740  | -1.25185 | 3.09209  |
| C | 1.28076  | -0.33972 | 4.17501  |
| C | -2.01639 | 0.68918  | -3.54884 |
| C | -0.91136 | 0.34737  | -2.55972 |
| C | 0.34488  | 0.92835  | -2.84063 |
| H | 0.50481  | 0.36074  | 4.49783  |
| H | 1.60080  | -0.92901 | 5.04205  |
| H | -1.38004 | -1.11100 | 3.60839  |
| H | -1.91869 | 1.72222  | -3.89183 |
| H | -3.01033 | 0.54659  | -3.12497 |
| H | -1.93237 | 0.04250  | -4.42991 |
| H | 0.38307  | 1.51213  | -3.75347 |
| H | 2.60915  | 1.92811  | -3.64039 |
| H | 3.57803  | 1.64570  | -2.17580 |
| H | 2.39451  | 2.95393  | -2.22414 |
| H | -4.66481 | -3.45718 | -1.81323 |
| H | -6.05124 | -2.11660 | -0.26730 |
| H | -5.15132 | -0.03447 | 0.70332  |
| H | -1.17462 | -2.54085 | -2.81809 |
| H | -2.18356 | -3.58455 | -4.82260 |
| H | -2.94995 | -2.01373 | -4.52884 |
| H | -3.79404 | -3.50309 | -4.09630 |
| H | -1.34647 | -5.00172 | -2.88000 |
| H | -2.93851 | -4.95295 | -2.11561 |
| H | -1.50839 | -4.43180 | -1.20960 |
| H | -1.63639 | 1.10775  | 0.25403  |
| H | -2.56587 | 2.13419  | 2.24450  |
| H | -2.81102 | 0.38619  | 2.37735  |
| H | -4.16417 | 1.44808  | 1.95946  |
| H | -2.82648 | 3.29471  | 0.00437  |
| H | -4.31137 | 2.43772  | -0.44026 |
| H | -2.89537 | 2.36280  | -1.49770 |
| H | 5.65409  | -0.46389 | 1.31064  |
| H | 5.44228  | 1.61450  | 2.62983  |
| H | 3.49267  | 3.09129  | 2.29017  |
| H | 3.08510  | -1.67679 | -1.10920 |
| H | 4.41249  | -3.57824 | -0.34622 |
| H | 3.65610  | -2.82280 | 1.06242  |
| H | 5.37644  | -2.56536 | 0.72986  |
| H | 5.21637  | -2.14411 | -2.30389 |



S33

|    |          |          |          |
|----|----------|----------|----------|
| H  | 6.06794  | -0.99446 | -1.25793 |
| H  | 4.82046  | -0.41918 | -2.37249 |
| H  | 0.76821  | 2.48938  | -0.18503 |
| H  | 0.96313  | 4.90400  | 0.13672  |
| H  | 2.49639  | 4.32819  | -0.53933 |
| H  | 2.37572  | 4.72008  | 1.17695  |
| H  | -0.33423 | 3.48616  | 1.79462  |
| H  | 1.08843  | 3.14580  | 2.78783  |
| H  | 0.14339  | 1.80461  | 2.11282  |
| H  | -0.96476 | -2.49717 | 2.46591  |
| H  | 1.47694  | -1.98358 | 2.70725  |
| H  | 2.14070  | 0.23523  | 3.81730  |
| N  | -1.15212 | -0.46358 | -1.53378 |
| N  | 1.68488  | 0.30406  | -0.91432 |
| O  | -0.00918 | -0.62981 | 2.03781  |
| O  | 1.16886  | -2.94832 | 0.36265  |
| O  | -0.10450 | -2.95284 | 0.09627  |
| Cu | 0.40257  | -1.11364 | -0.47111 |

23. L<sup>1</sup>CuX, X = oxirane

|   |          |          |          |
|---|----------|----------|----------|
| C | -0.22453 | -4.20007 | -0.27547 |
| C | 3.12863  | 0.03354  | 1.44364  |
| C | 4.46577  | -0.37584 | 1.48744  |
| C | 5.22221  | -0.50321 | 0.32507  |
| C | 4.63568  | -0.22643 | -0.90758 |
| C | 3.30202  | 0.18454  | -1.00334 |
| C | 2.30003  | 0.09575  | 2.72248  |
| C | 3.02510  | 0.79404  | 3.88415  |
| C | 1.84215  | -1.31764 | 3.13368  |
| C | 2.66295  | 0.40736  | -2.37053 |
| C | 2.30740  | -0.94253 | -3.02573 |
| C | 3.52770  | 1.26004  | -3.31378 |
| C | -3.11657 | -0.52355 | -0.27711 |
| C | -3.78163 | -1.00863 | 0.87485  |
| C | -4.94190 | -1.77304 | 0.71141  |
| C | -5.44698 | -2.06115 | -0.55401 |
| C | -4.77986 | -1.58852 | -1.68143 |
| C | -3.61537 | -0.82121 | -1.56970 |
| C | -3.20664 | -0.76912 | 2.26693  |
| C | -2.43145 | -2.01200 | 2.74769  |
| C | -4.26520 | -0.35257 | 3.30102  |
| C | -2.86231 | -0.38194 | -2.82144 |
| C | -3.77556 | 0.21488  | -3.90505 |
| C | -2.03682 | -1.55506 | -3.38832 |
| C | 1.71582  | 3.02072  | 0.31658  |
| C | 0.71016  | 1.89025  | 0.16360  |
| C | -0.65192 | 2.26778  | 0.09439  |
| C | -1.83647 | 1.50655  | -0.04154 |
| C | -3.13947 | 2.28991  | -0.07753 |
| C | 2.54405  | 0.32158  | 0.18560  |
| H | 1.85012  | -3.99951 | -1.04979 |
| H | -0.77765 | -4.49078 | 0.61397  |
| H | -0.64314 | -4.52049 | -1.22610 |
| H | 1.70989  | -3.97317 | 0.79090  |
| H | 1.22257  | 3.99367  | 0.32863  |
| H | 2.44391  | 3.00901  | -0.50089 |
| H | 2.28804  | 2.90966  | 1.24386  |
| H | -0.81796 | 3.33611  | 0.15820  |
| H | -2.96059 | 3.36250  | 0.00957  |
| H | -3.80338 | 1.98034  | 0.73601  |
| H | -3.68243 | 2.10221  | -1.00985 |
| H | 4.92295  | -0.60144 | 2.44684  |
| H | 6.26022  | -0.81893 | 0.37892  |

S34

|    |          |          |          |
|----|----------|----------|----------|
| H  | 5.22495  | -0.33605 | -1.81385 |
| H  | 1.39789  | 0.67259  | 2.50239  |
| H  | 2.35146  | 0.89964  | 4.74138  |
| H  | 3.36805  | 1.79321  | 3.59711  |
| H  | 3.89841  | 0.22756  | 4.22520  |
| H  | 1.19593  | -1.27900 | 4.01810  |
| H  | 2.70303  | -1.95395 | 3.37031  |
| H  | 1.27883  | -1.79435 | 2.32455  |
| H  | 1.72317  | 0.94243  | -2.21021 |
| H  | 1.79718  | -0.79015 | -3.98372 |
| H  | 1.64599  | -1.52791 | -2.37878 |
| H  | 3.21034  | -1.53507 | -3.21393 |
| H  | 2.98260  | 1.47002  | -4.24048 |
| H  | 4.45727  | 0.75140  | -3.59151 |
| H  | 3.79657  | 2.21683  | -2.85480 |
| H  | -5.45806 | -2.15195 | 1.58894  |
| H  | -6.35141 | -2.65324 | -0.66109 |
| H  | -5.16985 | -1.82411 | -2.66778 |
| H  | -2.48396 | 0.04766  | 2.18739  |
| H  | -1.96533 | -1.82963 | 3.72286  |
| H  | -1.63968 | -2.27513 | 2.03821  |
| H  | -3.09981 | -2.87529 | 2.84664  |
| H  | -3.78429 | -0.09269 | 4.25024  |
| H  | -4.97793 | -1.15808 | 3.50815  |
| H  | -4.83602 | 0.51742  | 2.96080  |
| H  | -2.15345 | 0.39474  | -2.52352 |
| H  | -3.17490 | 0.59863  | -4.73684 |
| H  | -4.37613 | 1.04118  | -3.51161 |
| H  | -4.46441 | -0.52973 | -4.31852 |
| H  | -1.44873 | -1.23703 | -4.25687 |
| H  | -2.69216 | -2.37517 | -3.70385 |
| H  | -1.34493 | -1.94508 | -2.63473 |
| N  | 1.15774  | 0.63557  | 0.10701  |
| N  | -1.88335 | 0.17655  | -0.13818 |
| O  | 0.24483  | -2.83894 | -0.26554 |
| C  | 1.21396  | -3.89940 | -0.17396 |
| Cu | -0.18208 | -0.78472 | -0.07780 |

24.  $L^1CuXO_2$   $\eta^1$  singlet, X = oxirane

|   |          |          |          |
|---|----------|----------|----------|
| C | -1.14364 | 2.33269  | -2.73900 |
| C | 3.58213  | 1.58560  | -1.86624 |
| C | 2.98912  | 0.25872  | -3.93465 |
| C | 0.52121  | -2.64196 | 1.38903  |
| C | -0.32720 | -2.81988 | 2.51183  |
| C | 0.20699  | -3.40433 | 3.66540  |
| C | 1.54034  | -3.79703 | 3.72644  |
| C | 2.36457  | -3.61043 | 2.62059  |
| C | 1.88281  | -3.04010 | 1.43805  |
| C | -1.80258 | -2.42366 | 2.47250  |
| C | -2.15953 | -1.40955 | 3.57372  |
| C | -0.87217 | 3.52631  | -3.41917 |
| C | -2.72592 | -3.65643 | 2.54874  |
| C | 2.83667  | -2.84674 | 0.25875  |
| C | 3.53735  | -4.15683 | -0.15494 |
| C | 3.88276  | -1.75593 | 0.56255  |
| C | 1.60384  | 2.31131  | 1.54710  |
| C | 1.51375  | 1.33093  | 2.63257  |
| C | -0.87089 | -0.70468 | -4.04731 |
| C | -0.60793 | -0.86480 | -2.55616 |
| C | -0.71625 | -2.18826 | -2.07761 |
| C | 0.41278  | 3.85569  | -3.83592 |
| C | -0.37012 | -2.72813 | -0.82788 |
| C | -0.39545 | -4.24497 | -0.73612 |

|    |          |          |          |
|----|----------|----------|----------|
| C  | -0.06669 | 1.44988  | -2.47352 |
| C  | 1.46494  | 2.98930  | -3.55847 |
| C  | 1.25676  | 1.78828  | -2.87238 |
| C  | -2.58264 | 2.04400  | -2.31175 |
| C  | -3.56008 | 2.01649  | -3.50592 |
| C  | -3.06882 | 3.07401  | -1.27330 |
| C  | 2.45034  | 0.86545  | -2.62196 |
| H  | -0.87903 | -1.67624 | -4.54433 |
| H  | -0.11757 | -0.07371 | -4.52320 |
| H  | -1.83828 | -0.22687 | -4.22132 |
| H  | -1.02507 | -2.91519 | -2.81842 |
| H  | -0.97952 | -4.67040 | -1.55411 |
| H  | -0.81619 | -4.58217 | 0.21345  |
| H  | 0.61731  | -4.65475 | -0.79888 |
| H  | -1.69083 | 4.20689  | -3.63587 |
| H  | 0.59334  | 4.78117  | -4.37611 |
| H  | 2.46782  | 3.24398  | -3.89108 |
| H  | -2.60203 | 1.06235  | -1.82914 |
| H  | -4.56190 | 1.72996  | -3.16731 |
| H  | -3.25745 | 1.31106  | -4.28508 |
| H  | -3.64313 | 3.00256  | -3.97687 |
| H  | -4.06776 | 2.80709  | -0.91308 |
| H  | -3.12575 | 4.07723  | -1.71166 |
| H  | -2.39678 | 3.10571  | -0.41418 |
| H  | 2.10770  | 0.04137  | -1.99130 |
| H  | 4.40494  | 0.89234  | -1.66150 |
| H  | 3.22742  | 1.97836  | -0.90897 |
| H  | 3.99195  | 2.42124  | -2.44472 |
| H  | 3.82702  | -0.41790 | -3.73034 |
| H  | 3.34981  | 1.03736  | -4.61663 |
| H  | 2.22144  | -0.31411 | -4.46359 |
| H  | -0.43574 | -3.56102 | 4.52741  |
| H  | 1.93557  | -4.25221 | 4.63053  |
| H  | 3.40566  | -3.91901 | 2.67472  |
| H  | -1.99285 | -1.93064 | 1.51631  |
| H  | -3.20617 | -1.10253 | 3.47973  |
| H  | -1.54608 | -0.50725 | 3.49009  |
| H  | -2.01824 | -1.82820 | 4.57629  |
| H  | -3.77588 | -3.35199 | 2.47531  |
| H  | -2.59908 | -4.19602 | 3.49432  |
| H  | -2.52732 | -4.36244 | 1.73596  |
| H  | 2.25069  | -2.50121 | -0.59680 |
| H  | 4.13695  | -3.99810 | -1.05828 |
| H  | 2.82090  | -4.95720 | -0.36551 |
| H  | 4.21390  | -4.52039 | 0.62630  |
| H  | 4.54435  | -1.60900 | -0.29939 |
| H  | 4.50956  | -2.03660 | 1.41697  |
| H  | 3.40073  | -0.80142 | 0.79092  |
| H  | 0.70878  | 2.84347  | 1.23575  |
| H  | 2.55242  | 2.79301  | 1.32353  |
| H  | 2.39219  | 1.08028  | 3.22137  |
| H  | 0.55202  | 1.16049  | 3.10962  |
| N  | -0.27280 | 0.19131  | -1.81557 |
| N  | -0.00100 | -2.00037 | 0.22548  |
| O  | 1.58844  | 0.88821  | 1.25312  |
| O  | -2.45765 | 0.96658  | 1.06688  |
| O  | -1.24325 | 1.39117  | 0.91700  |
| Cu | -0.18530 | -0.02379 | 0.23481  |

25.  $L^1CuXO_2$   $\eta^1$  triplet, X = oxirane

|   |          |          |          |
|---|----------|----------|----------|
| C | -5.05498 | -1.69698 | 0.40399  |
| C | -5.42105 | -1.89193 | -0.92399 |
| C | -4.61730 | -1.37609 | -1.93573 |

|   |          |          |          |
|---|----------|----------|----------|
| C | -3.45534 | -0.65178 | -1.64841 |
| C | -3.52743 | -0.82310 | 2.22095  |
| C | -3.43722 | -2.17686 | 2.95128  |
| C | -4.50929 | 0.11087  | 2.95707  |
| C | -2.60272 | -0.12384 | -2.80232 |
| C | -3.41520 | 0.74468  | -3.78193 |
| C | -1.90568 | -1.27422 | -3.55654 |
| C | 1.71076  | 3.09884  | 0.30257  |
| C | 0.72422  | 1.94153  | 0.31139  |
| C | -0.64205 | 2.30500  | 0.30530  |
| C | -1.82361 | 1.54944  | 0.12187  |
| C | 3.35247  | 0.20073  | 1.35409  |
| C | -3.10001 | 2.36450  | -0.02669 |
| C | 2.58798  | 0.42895  | 0.18281  |
| C | 4.71616  | -0.08215 | 1.21796  |
| C | 5.31996  | -0.16745 | -0.03242 |
| C | -0.92148 | -3.82788 | -0.63031 |
| C | 4.55238  | 0.02575  | -1.17729 |
| C | 3.18839  | 0.32617  | -1.09762 |
| C | 2.72941  | 0.23266  | 2.74799  |
| C | 0.51043  | -3.95439 | -0.33615 |
| C | 3.21172  | 1.43925  | 3.57720  |
| C | 2.99998  | -1.07636 | 3.51488  |
| C | 2.38086  | 0.50429  | -2.38248 |
| C | 2.23653  | -0.83309 | -3.13678 |
| C | 2.96804  | 1.58874  | -3.30485 |
| C | -3.09445 | -0.45118 | -0.29030 |
| C | -3.89490 | -0.99240 | 0.74758  |
| H | 0.84358  | -3.93949 | 0.69801  |
| H | 1.16966  | -4.44379 | -1.04911 |
| H | -1.63039 | -3.71851 | 0.18632  |
| H | -1.32323 | -4.22341 | -1.55987 |
| H | 1.22046  | 4.03641  | 0.56949  |
| H | 2.14335  | 3.21472  | -0.69761 |
| H | 2.54464  | 2.92693  | 0.98575  |
| H | -0.81178 | 3.37264  | 0.37529  |
| H | -2.97015 | 3.37260  | 0.37111  |
| H | -3.94411 | 1.89040  | 0.47783  |
| H | -3.37283 | 2.45374  | -1.08423 |
| H | 5.31519  | -0.24491 | 2.11020  |
| H | 6.38021  | -0.39070 | -0.11492 |
| H | 5.02205  | -0.05646 | -2.15432 |
| H | 1.64714  | 0.32397  | 2.62446  |
| H | 2.73588  | 1.44084  | 4.56457  |
| H | 2.97243  | 2.39018  | 3.09160  |
| H | 4.29652  | 1.40828  | 3.73063  |
| H | 2.45086  | -1.08451 | 4.46261  |
| H | 4.06429  | -1.19536 | 3.74686  |
| H | 2.68440  | -1.94898 | 2.93619  |
| H | 1.37474  | 0.82605  | -2.10045 |
| H | 1.64607  | -0.69865 | -4.05063 |
| H | 1.73208  | -1.58216 | -2.51897 |
| H | 3.21536  | -1.23289 | -3.42675 |
| H | 2.31803  | 1.74362  | -4.17337 |
| H | 3.95824  | 1.31090  | -3.68292 |
| H | 3.07015  | 2.54720  | -2.78548 |
| H | -5.68271 | -2.10114 | 1.19369  |
| H | -6.32515 | -2.44279 | -1.16901 |
| H | -4.90029 | -1.53490 | -2.97344 |
| H | -2.53739 | -0.36150 | 2.26213  |
| H | -3.06870 | -2.03550 | 3.97266  |
| H | -2.75111 | -2.86087 | 2.44236  |
| H | -4.41352 | -2.66958 | 3.01694  |
| H | -4.21166 | 0.23262  | 4.00483  |

|    |          |          |          |
|----|----------|----------|----------|
| H  | -5.52761 | -0.29447 | 2.94415  |
| H  | -4.54232 | 1.10565  | 2.50271  |
| H  | -1.81638 | 0.50509  | -2.37668 |
| H  | -2.75813 | 1.17650  | -4.54532 |
| H  | -3.92181 | 1.56785  | -3.26849 |
| H  | -4.18235 | 0.16063  | -4.30292 |
| H  | -1.29202 | -0.88308 | -4.37643 |
| H  | -2.63767 | -1.96560 | -3.99018 |
| H  | -1.25118 | -1.84325 | -2.89014 |
| N  | 1.18556  | 0.69168  | 0.27249  |
| N  | -1.87293 | 0.22082  | 0.02330  |
| O  | -0.04016 | -1.96695 | 1.95896  |
| O  | -0.21514 | -1.47605 | 3.09226  |
| O  | -0.03305 | -2.69909 | -0.80892 |
| Cu | -0.14587 | -0.75811 | 0.23733  |

26.  $L^1CuXO_2$   $\eta^2$  singlet, X = oxirane

|   |          |          |          |
|---|----------|----------|----------|
| C | -1.22987 | 2.30020  | -2.78227 |
| C | -1.94294 | -2.46567 | 2.51429  |
| C | -2.36334 | -1.58056 | 3.70345  |
| C | -0.96179 | 3.53273  | -3.39204 |
| C | -2.76019 | -3.77250 | 2.50390  |
| C | 2.69470  | -2.64363 | 0.22008  |
| C | 3.48826  | -3.91950 | -0.12670 |
| C | 3.65825  | -1.46762 | 0.46499  |
| C | 2.18470  | 1.95907  | 1.69982  |
| C | 1.86388  | 0.93872  | 2.70741  |
| C | 3.60332  | 1.79898  | -1.94370 |
| C | -0.73990 | -0.77671 | -4.18414 |
| C | -0.56180 | -0.93349 | -2.68169 |
| C | -0.65633 | -2.25569 | -2.20024 |
| C | 0.33147  | 3.92335  | -3.71363 |
| C | -0.40918 | -2.75789 | -0.90998 |
| C | -0.35310 | -4.26899 | -0.77693 |
| C | -0.14146 | 1.43590  | -2.50734 |
| C | 1.39658  | 3.08559  | -3.40111 |
| C | 1.19174  | 1.84632  | -2.78613 |
| C | -2.67781 | 1.95738  | -2.44166 |
| C | 2.84253  | 0.09031  | -3.62436 |
| C | -3.54778 | 1.80936  | -3.70664 |
| C | -3.30123 | 3.00889  | -1.50158 |
| C | 2.39950  | 0.97510  | -2.44015 |
| C | 0.36612  | -2.54951 | 1.36601  |
| C | -0.44460 | -2.75056 | 2.51089  |
| C | 0.15413  | -3.24465 | 3.67648  |
| C | 1.51425  | -3.52365 | 3.73641  |
| C | 2.30317  | -3.32156 | 2.60929  |
| C | 1.75829  | -2.84309 | 1.41318  |
| H | -0.45540 | -1.69354 | -4.70441 |
| H | -0.16364 | 0.05745  | -4.58483 |
| H | -1.79395 | -0.58295 | -4.40703 |
| H | -0.85637 | -3.00348 | -2.95737 |
| H | -0.83880 | -4.74893 | -1.62819 |
| H | -0.82991 | -4.60463 | 0.14642  |
| H | 0.68517  | -4.61346 | -0.74500 |
| H | -1.78909 | 4.19945  | -3.61796 |
| H | 0.51188  | 4.88038  | -4.19589 |
| H | 2.40772  | 3.40248  | -3.63697 |
| H | -2.67839 | 1.00443  | -1.90652 |
| H | -4.56577 | 1.50886  | -3.43502 |
| H | -3.15038 | 1.06393  | -4.40137 |
| H | -3.61812 | 2.75815  | -4.25107 |
| H | -4.30010 | 2.68604  | -1.18821 |

S38

|    |          |          |          |
|----|----------|----------|----------|
| H  | -3.40907 | 3.97911  | -2.00005 |
| H  | -2.69437 | 3.14551  | -0.60502 |
| H  | 2.09194  | 0.30902  | -1.62868 |
| H  | 4.35653  | 1.13762  | -1.50288 |
| H  | 3.30953  | 2.53532  | -1.18988 |
| H  | 4.09440  | 2.33950  | -2.76070 |
| H  | 3.72581  | -0.49997 | -3.35371 |
| H  | 3.10496  | 0.70607  | -4.49266 |
| H  | 2.06021  | -0.60770 | -3.93071 |
| H  | -0.46132 | -3.41286 | 4.55528  |
| H  | 1.95745  | -3.89960 | 4.65470  |
| H  | 3.36605  | -3.54338 | 2.65648  |
| H  | -2.17906 | -1.90968 | 1.60476  |
| H  | -3.41725 | -1.30020 | 3.60508  |
| H  | -1.77410 | -0.66131 | 3.73749  |
| H  | -2.25074 | -2.10114 | 4.66138  |
| H  | -3.83313 | -3.55090 | 2.48620  |
| H  | -2.55748 | -4.37284 | 3.39844  |
| H  | -2.53214 | -4.39130 | 1.63019  |
| H  | 2.09228  | -2.38279 | -0.65312 |
| H  | 4.06204  | -3.76967 | -1.04806 |
| H  | 2.83065  | -4.78173 | -0.27622 |
| H  | 4.20202  | -4.18447 | 0.66087  |
| H  | 4.32500  | -1.33009 | -0.39392 |
| H  | 4.28621  | -1.64626 | 1.34575  |
| H  | 3.09569  | -0.54357 | 0.61675  |
| H  | 1.77970  | 2.96458  | 1.80190  |
| H  | 3.10584  | 1.88054  | 1.12493  |
| H  | 2.54472  | 0.10561  | 2.87152  |
| H  | 1.22322  | 1.19865  | 3.54788  |
| N  | -0.35531 | 0.14136  | -1.92059 |
| N  | -0.19164 | -2.00072 | 0.16455  |
| O  | 1.20362  | 0.94516  | 1.43545  |
| O  | -1.54121 | 0.51796  | 1.55523  |
| O  | -1.51494 | 1.42214  | 0.56790  |
| Cu | -0.56612 | -0.10273 | 0.00888  |

27.  $L^1CuXO_2$   $\eta^2$  triplet, X = oxirane

|   |          |          |          |
|---|----------|----------|----------|
| C | 4.81162  | 0.10934  | 1.76408  |
| C | 4.74532  | 1.26169  | 2.54028  |
| C | 3.68239  | 2.14139  | 2.36921  |
| C | 2.62600  | 1.98401  | -1.90454 |
| C | 2.67137  | 1.89842  | 1.43231  |
| C | 3.96941  | -1.44388 | -0.04221 |
| C | 4.36155  | -2.68903 | 0.77309  |
| C | 4.97817  | -1.21303 | -1.18595 |
| C | 1.53519  | 2.91644  | 1.31031  |
| C | 2.05697  | 4.33066  | 0.98062  |
| C | 1.52720  | 1.05839  | -1.40555 |
| C | 0.67085  | 2.95783  | 2.58653  |
| C | -0.48920 | -1.22429 | 3.80726  |
| C | 0.89449  | -0.73855 | 3.79312  |
| C | -2.46145 | -0.86245 | -0.63937 |
| C | -1.96166 | 0.70604  | -2.98162 |
| C | -0.88012 | 0.40992  | -1.95264 |
| C | 0.37469  | 1.00135  | -2.21001 |
| C | -2.91271 | -2.08094 | -1.20206 |
| C | -4.20031 | -2.52892 | -0.88043 |
| C | -5.02631 | -1.80630 | -0.02653 |
| C | -2.69113 | -3.04937 | -3.53993 |
| C | -4.56462 | -0.61988 | 0.53647  |
| C | -3.28383 | -0.13138 | 0.25858  |
| C | -2.04713 | -2.91358 | -2.14515 |

|    |          |          |          |
|----|----------|----------|----------|
| C  | -1.73948 | -4.30663 | -1.56009 |
| C  | -2.81031 | 1.17334  | 0.89919  |
| C  | -3.16628 | 1.26925  | 2.39349  |
| C  | -3.35560 | 2.40700  | 0.14943  |
| C  | 2.74438  | 0.71345  | 0.64938  |
| C  | 3.82608  | -0.19055 | 0.81724  |
| H  | 1.19597  | 0.06364  | 4.46363  |
| H  | -1.20823 | -0.78062 | 4.49368  |
| H  | -1.83034 | 1.70647  | -3.40074 |
| H  | -2.96425 | 0.62400  | -2.56143 |
| H  | -1.89057 | -0.00982 | -3.80877 |
| H  | 0.42805  | 1.57810  | -3.12633 |
| H  | 2.68345  | 1.93808  | -2.99513 |
| H  | 3.59996  | 1.72822  | -1.48563 |
| H  | 2.40854  | 3.02284  | -1.63449 |
| H  | -4.56031 | -3.46015 | -1.30916 |
| H  | -6.02469 | -2.16761 | 0.20510  |
| H  | -5.21184 | -0.06412 | 1.20872  |
| H  | -1.09344 | -2.39140 | -2.26778 |
| H  | -2.01997 | -3.58186 | -4.22320 |
| H  | -2.91817 | -2.07326 | -3.97970 |
| H  | -3.62898 | -3.61443 | -3.49231 |
| H  | -1.07596 | -4.86364 | -2.23164 |
| H  | -2.65410 | -4.89752 | -1.43575 |
| H  | -1.25288 | -4.22916 | -0.58483 |
| H  | -1.71928 | 1.19381  | 0.82479  |
| H  | -2.67720 | 2.14213  | 2.83913  |
| H  | -2.83431 | 0.38175  | 2.93817  |
| H  | -4.24399 | 1.38340  | 2.55616  |
| H  | -2.99887 | 3.33161  | 0.61834  |
| H  | -4.45166 | 2.42271  | 0.16932  |
| H  | -3.04105 | 2.42167  | -0.89760 |
| H  | 5.64882  | -0.57050 | 1.89246  |
| H  | 5.51958  | 1.47468  | 3.27243  |
| H  | 3.63383  | 3.04053  | 2.97792  |
| H  | 2.99651  | -1.64256 | -0.50048 |
| H  | 4.33358  | -3.57900 | 0.13516  |
| H  | 3.67559  | -2.85379 | 1.60766  |
| H  | 5.37712  | -2.61177 | 1.17750  |
| H  | 5.05304  | -2.10331 | -1.82081 |
| H  | 5.97726  | -0.99741 | -0.78973 |
| H  | 4.68218  | -0.37182 | -1.82015 |
| H  | 0.88195  | 2.60448  | 0.49156  |
| H  | 1.21867  | 5.01100  | 0.79269  |
| H  | 2.70225  | 4.33623  | 0.09680  |
| H  | 2.63582  | 4.74959  | 1.81128  |
| H  | -0.14244 | 3.68464  | 2.47204  |
| H  | 1.26339  | 3.26142  | 3.45795  |
| H  | 0.23309  | 1.97773  | 2.78749  |
| H  | -0.70765 | -2.23601 | 3.47449  |
| H  | 1.68738  | -1.39714 | 3.44792  |
| N  | -1.14074 | -0.38145 | -0.91527 |
| N  | 1.68643  | 0.39291  | -0.26033 |
| O  | -0.03432 | -0.33778 | 2.76650  |
| O  | 1.08953  | -2.69349 | 1.25481  |
| O  | -0.18062 | -2.73845 | 0.97780  |
| Cu | 0.36055  | -0.95593 | 0.24613  |

28. L<sup>1</sup>CuX, X = triphenylphosphine

|   |          |          |          |
|---|----------|----------|----------|
| C | -2.41758 | -3.38909 | 0.33244  |
| C | -3.90579 | -4.94811 | -0.76702 |
| C | -2.98629 | -5.08253 | -1.80506 |
| C | 1.72760  | 3.64882  | 0.19720  |

|   |          |          |          |
|---|----------|----------|----------|
| C | 0.72299  | 2.53058  | -0.03664 |
| C | -0.59391 | 2.94808  | -0.31821 |
| C | -1.79791 | 2.21679  | -0.40441 |
| C | -3.06630 | 3.05271  | -0.51155 |
| C | 2.44027  | 0.95749  | 0.52913  |
| C | 2.64289  | 0.73635  | 1.91663  |
| C | 3.90905  | 0.34283  | 2.36344  |
| C | 4.97141  | 0.17104  | 1.48046  |
| C | 4.77023  | 0.40931  | 0.12407  |
| C | 3.52461  | 0.81132  | -0.37463 |
| C | 1.51517  | 0.90214  | 2.93313  |
| C | 1.83104  | 2.01212  | 3.95464  |
| C | 1.19900  | -0.41875 | 3.65991  |
| C | 3.37744  | 1.05137  | -1.87513 |
| C | 3.65895  | -0.22860 | -2.68111 |
| C | 4.28970  | 2.18613  | -2.37729 |
| C | -3.18300 | 0.27569  | -0.29699 |
| C | -3.77339 | 0.02480  | 0.96555  |
| C | -4.98538 | -0.67541 | 1.01875  |
| C | -5.62008 | -1.10965 | -0.13940 |
| C | -5.05480 | -0.81918 | -1.37896 |
| C | -3.84879 | -0.11890 | -1.48580 |
| C | -3.12609 | 0.50018  | 2.26363  |
| C | -2.51934 | -0.66691 | 3.06326  |
| C | -4.10449 | 1.30233  | 3.14052  |
| C | -3.26591 | 0.22708  | -2.85385 |
| C | -4.31560 | 0.35279  | -3.96659 |
| C | -2.17776 | -0.77633 | -3.26014 |
| C | -1.77657 | -4.38477 | -1.76974 |
| C | 3.10537  | -3.40626 | 2.03773  |
| C | 2.65040  | -4.52201 | 2.74344  |
| C | 1.39313  | -5.05298 | 2.45814  |
| C | 2.30365  | -2.82037 | 1.05830  |
| C | 0.59339  | -4.47882 | 1.46492  |
| C | 1.58749  | -2.86407 | -4.44062 |
| C | 2.25528  | -4.08920 | -4.42882 |
| C | 2.30418  | -4.83895 | -3.25162 |
| C | 0.97083  | -2.39079 | -3.28063 |
| C | 1.68217  | -4.37003 | -2.09514 |
| C | 1.00542  | -3.13906 | -2.09632 |
| C | 1.04180  | -3.35585 | 0.75723  |
| C | -1.47578 | -3.53289 | -0.69578 |
| C | -3.61597 | -4.10041 | 0.30476  |
| H | 2.07236  | -0.79852 | 4.20320  |
| H | 0.88626  | -1.19606 | 2.95656  |
| H | 2.33945  | 1.34452  | -2.06080 |
| H | 0.39270  | -0.27161 | 4.38653  |
| H | 3.03628  | -1.05741 | -2.34529 |
| H | 4.70582  | -0.53787 | -2.58432 |
| H | -4.33067 | -3.97113 | 1.11007  |
| H | 5.34711  | 1.91452  | -2.27977 |
| H | 4.13682  | 3.11659  | -1.82281 |
| H | -5.43975 | -0.87853 | 1.98469  |
| H | -6.55754 | -1.65559 | -0.08099 |
| H | -5.57015 | -1.13579 | -2.27938 |
| H | -2.30376 | 1.16890  | 1.99653  |
| H | -2.09577 | -0.31169 | 4.00880  |
| H | -1.71257 | -1.14851 | 2.50299  |
| H | -3.27545 | -1.42505 | 3.29889  |
| H | -3.58067 | 1.72206  | 4.00584  |
| H | -4.91896 | 0.67690  | 3.52181  |
| H | -4.55538 | 2.12981  | 2.58298  |
| H | -2.77392 | 1.20120  | -2.76119 |
| H | -3.84786 | 0.74529  | -4.87503 |



|    |          |          |          |
|----|----------|----------|----------|
| H  | -5.13080 | 1.02641  | -3.68435 |
| H  | -4.75422 | -0.61651 | -4.22479 |
| H  | -1.73316 | -0.50410 | -4.22455 |
| H  | -2.58463 | -1.78843 | -3.34322 |
| H  | -1.38984 | -0.78705 | -2.50703 |
| H  | -1.07238 | -4.50964 | -2.58288 |
| H  | 2.70036  | 1.75436  | 4.57112  |
| H  | 2.04521  | 2.96557  | 3.46075  |
| H  | 0.98022  | 2.16463  | 4.62784  |
| H  | 0.61783  | 1.20270  | 2.38474  |
| H  | 5.60015  | 0.28688  | -0.56698 |
| H  | 5.94797  | -0.13495 | 1.84589  |
| H  | 4.06418  | 0.16736  | 3.42490  |
| H  | -3.67871 | 2.74389  | -1.36340 |
| H  | 1.55119  | -2.26861 | -5.34751 |
| H  | -3.68957 | 2.93031  | 0.38009  |
| H  | -2.82943 | 4.11158  | -0.62051 |
| H  | -0.71639 | 4.02060  | -0.39556 |
| H  | 2.15207  | 3.58877  | 1.20419  |
| H  | 2.56654  | 3.57916  | -0.49970 |
| H  | 4.07633  | -2.97380 | 2.25543  |
| H  | 1.72216  | -4.96598 | -1.18978 |
| H  | 2.82471  | -5.79223 | -3.23179 |
| H  | 2.73808  | -4.45698 | -5.32956 |
| H  | 0.46995  | -1.42944 | -3.29740 |
| H  | -0.37693 | -4.90782 | 1.24543  |
| H  | 1.03105  | -5.92022 | 3.00253  |
| H  | 3.27160  | -4.97231 | 3.51346  |
| H  | 2.66170  | -1.94092 | 0.53264  |
| H  | 1.26070  | 4.62740  | 0.07842  |
| H  | -3.20468 | -5.73316 | -2.64799 |
| H  | -4.84515 | -5.49303 | -0.79625 |
| H  | 3.45846  | -0.06723 | -3.74684 |
| H  | 4.09652  | 2.38801  | -3.43749 |
| H  | -2.22017 | -2.71567 | 1.15877  |
| N  | -1.89120 | 0.88802  | -0.36063 |
| N  | 1.12080  | 1.26081  | 0.06554  |
| P  | 0.08639  | -2.54379 | -0.60134 |
| Cu | -0.18346 | -0.23533 | -0.26075 |

29.  $L^1CuXO_2$   $\eta^1$  singlet, X = triphenylphosphine

|   |          |          |          |
|---|----------|----------|----------|
| O | 0.90053  | -1.36764 | 2.55544  |
| O | 0.16844  | -0.40229 | 2.16877  |
| C | -2.42138 | -3.93703 | -2.02253 |
| C | -1.26308 | -3.15889 | -1.99141 |
| C | 3.87687  | -2.52693 | 1.25381  |
| C | 3.80139  | -3.91858 | 1.21907  |
| C | 2.71311  | -4.54379 | 0.60263  |
| C | 2.86766  | -1.75851 | 0.67294  |
| C | 1.70514  | -3.78063 | 0.01580  |
| C | 1.13451  | 0.43671  | -4.39539 |
| C | 1.88508  | -0.50835 | -5.09723 |
| C | 2.24561  | -1.70845 | -4.47976 |
| C | 0.74161  | 0.18064  | -3.08152 |
| C | 1.85329  | -1.96707 | -3.16595 |
| C | 1.08846  | -1.02732 | -2.45837 |
| C | 1.78368  | -2.37981 | 0.03059  |
| C | -0.98202 | -2.35910 | -0.87367 |
| C | -3.03080 | -3.12571 | 0.17133  |
| C | -2.75768 | 0.02745  | -3.47298 |
| C | -3.18805 | 2.62532  | 3.05724  |
| C | -3.30568 | -3.92150 | -0.94217 |
| C | 1.83359  | 1.12521  | 4.57553  |

|   |          |          |          |
|---|----------|----------|----------|
| C | -3.96484 | 2.22342  | -3.31175 |
| C | -2.76249 | 0.21286  | 3.66666  |
| C | 4.31413  | 0.58661  | -1.93120 |
| C | 1.82451  | 3.61051  | 4.15016  |
| C | -2.99381 | 1.26648  | -2.59038 |
| C | -2.65539 | 1.26819  | 2.55439  |
| C | -5.25985 | -0.13732 | 0.13307  |
| C | 3.71644  | 1.86230  | -1.30664 |
| C | 1.83334  | 2.21732  | 3.49077  |
| C | 5.36593  | 1.66785  | 2.13361  |
| C | -4.71686 | 0.21225  | -1.09695 |
| C | -4.57412 | 0.19438  | 1.29881  |
| C | 5.15657  | 1.68290  | 0.75881  |
| C | 4.28322  | 1.83985  | 2.99200  |
| C | -3.49477 | 0.89030  | -1.19702 |
| C | 2.79353  | 2.09684  | 1.09869  |
| C | -2.79621 | 1.21080  | -0.00631 |
| C | 4.34246  | 3.08877  | -2.00000 |
| C | 1.06221  | 3.56117  | 0.37163  |
| C | -1.43337 | 3.17619  | -0.13167 |
| C | -1.87666 | -2.34531 | 0.20676  |
| C | -0.24530 | 3.92840  | -0.00524 |
| C | 2.98923  | 2.04846  | 2.50451  |
| C | -3.34677 | 0.86219  | 1.25628  |
| C | 2.03153  | 4.72340  | 0.54103  |
| C | -2.66995 | 4.01673  | -0.42400 |
| C | 3.88262  | 1.88889  | 0.21323  |
| H | -1.66891 | -1.71254 | 1.06262  |
| H | -0.38228 | 4.99259  | -0.15447 |
| H | -3.69582 | -0.50668 | -3.65828 |
| H | -3.05171 | 3.41434  | 2.31284  |
| H | -3.72320 | -3.09370 | 1.00616  |
| H | 2.15114  | -2.89457 | -2.68708 |
| H | 2.53117  | 4.69193  | 1.51083  |
| H | -2.77166 | 4.16321  | -1.50513 |
| H | 0.16800  | 0.92150  | -2.53261 |
| H | 2.83756  | -2.44263 | -5.01838 |
| H | 2.19410  | -0.30812 | -6.11901 |
| H | 0.85922  | 1.37606  | -4.86571 |
| H | 0.85676  | -4.27299 | -0.44846 |
| H | 2.92271  | -0.67685 | 0.72582  |
| H | 2.82195  | 4.68554  | -0.21193 |
| H | 1.51423  | 5.67904  | 0.44567  |
| H | -3.58667 | 3.54704  | -0.06702 |
| H | -2.57844 | 5.00461  | 0.03221  |
| H | 2.64723  | -5.62770 | 0.58167  |
| H | 4.58143  | -4.51772 | 1.67970  |
| H | 4.70710  | -2.02944 | 1.74526  |
| H | -0.58944 | -3.16579 | -2.84223 |
| H | 4.44499  | 1.81035  | 4.06536  |
| H | 6.36405  | 1.51446  | 2.53414  |
| H | 5.99909  | 1.53141  | 0.08993  |
| H | -5.00500 | -0.06501 | 2.26071  |
| H | -6.21263 | -0.65664 | 0.18465  |
| H | -5.25466 | -0.04043 | -2.00644 |
| H | -2.63451 | -4.54879 | -2.89443 |
| H | -4.21103 | -4.52094 | -0.97257 |
| H | -2.06629 | -0.67572 | -3.00789 |
| H | -4.25801 | 2.56166  | 3.28677  |
| H | 0.90731  | 2.10960  | 2.92127  |
| H | 2.75368  | 3.79063  | 4.70305  |
| H | 2.64330  | 1.86664  | -1.51747 |
| H | 3.94632  | -0.31829 | -1.44387 |
| H | -1.59356 | 1.39957  | 2.32967  |

|    |          |          |          |
|----|----------|----------|----------|
| H  | -2.13744 | 0.50590  | 4.51635  |
| H  | -2.03649 | 1.78378  | -2.47371 |
| H  | -3.53741 | 2.55340  | -4.26528 |
| H  | 1.70802  | 4.41464  | 3.41899  |
| H  | 0.99332  | 3.68686  | 4.86019  |
| H  | 2.67794  | 1.23852  | 5.26508  |
| H  | 5.40737  | 0.58133  | -1.86020 |
| H  | 4.05300  | 0.52957  | -2.99248 |
| H  | 5.41713  | 3.14798  | -1.79486 |
| H  | -2.42145 | -0.76819 | 3.32469  |
| H  | -3.78733 | 0.10861  | 4.04009  |
| H  | -2.66319 | 2.92966  | 3.96970  |
| H  | -4.19213 | 3.10914  | -2.71365 |
| H  | -4.91421 | 1.72416  | -3.53332 |
| H  | -2.34573 | 0.32087  | -4.44507 |
| H  | 1.87543  | 0.12775  | 4.13369  |
| H  | 0.91774  | 1.19694  | 5.17312  |
| H  | 3.89031  | 4.02898  | -1.67604 |
| H  | 4.21283  | 3.01572  | -3.08567 |
| N  | 1.47118  | 2.30976  | 0.58620  |
| N  | -1.51120 | 1.85139  | -0.01548 |
| P  | 0.51420  | -1.30305 | -0.73284 |
| Cu | 0.20091  | 0.71592  | 0.37610  |

30.  $L^1CuXO_2 \eta^1$  triplet, X = triphenylphosphine

|   |               |               |               |
|---|---------------|---------------|---------------|
| O | .3438304940   | -1.2900950400 | 2.6616690080  |
| O | -.1140789174  | -.2182098944  | 2.2484623418  |
| C | -2.1519923235 | -4.2492539872 | -1.9165286233 |
| C | -1.0484746890 | -3.3959994373 | -1.9047247885 |
| C | 3.9521999120  | -2.3583793227 | 1.2611538030  |
| C | 3.8180481613  | -3.7317680549 | 1.4717824607  |
| C | 2.6753497265  | -4.3930604844 | 1.0200457119  |
| C | 2.9479990712  | -1.6512490135 | .6021866411   |
| C | 1.6714947289  | -3.6897147153 | .3522590976   |
| C | 1.2815290249  | -.1150525421  | -4.6421691226 |
| C | 2.0597111350  | -1.1458350714 | -5.1694862034 |
| C | 2.4322842545  | -2.2179302215 | -4.3562210281 |
| C | .8685709162   | -.1604715101  | -3.3099188443 |
| C | 2.0135687738  | -2.2683258549 | -3.0267385416 |
| C | 1.2126510747  | -1.2457074773 | -2.4924172802 |
| C | 1.8019045997  | -2.3114612122 | .1292202363   |
| C | -.9140275434  | -2.4188609474 | -.9048110921  |
| C | -3.0194456797 | -3.1622044880 | .0553260280   |
| C | -2.7318244475 | .0853224289   | -3.4860897342 |
| C | -3.6338844903 | 2.5833779551  | 3.1929995172  |
| C | -3.1368693748 | -4.1385454023 | -.9337773911  |
| C | 2.2529960614  | .8004447039   | 4.4421859457  |
| C | -3.4748208030 | 2.4893470784  | -3.2964670563 |
| C | -3.1096486396 | .1512407245   | 3.5893499524  |
| C | 4.2548727719  | .8481156462   | -2.2081104762 |
| C | 2.0523961215  | 3.3022737355  | 4.2397656876  |
| C | -2.7889135814 | 1.3194375747  | -2.5642007431 |
| C | -2.9812067298 | 1.3203041712  | 2.5937557556  |
| C | -5.4249255332 | .1179529657   | -.0819531329  |
| C | 3.6005088780  | 2.0380558644  | -1.4778513059 |
| C | 2.0928838042  | 1.9738393680  | 3.4569497017  |
| C | 5.5309264197  | 1.7554040020  | 1.8052757630  |
| C | -4.7434495770 | .4188878523   | -1.2550325099 |
| C | -4.8264921787 | .4032011189   | 1.1414535903  |
| C | 5.2121660078  | 1.8444914002  | .4548401510   |
| C | 4.5082300139  | 1.7953562450  | 2.7483452425  |
| C | -3.4711791056 | 1.0028888403  | -1.2360783502 |
| C | 2.8593538915  | 2.1032425948  | .9898886631   |

|   |               |               |               |
|---|---------------|---------------|---------------|
| C | -2.8732711652 | 1.3077345019  | .0110215778   |
| C | 4.0469983003  | 3.3561565242  | -2.1395964368 |
| C | 1.0552916257  | 3.5855823663  | .5298577565   |
| C | -1.4766484635 | 3.2394759361  | .1030667393   |
| C | -1.9191628956 | -2.3057776203 | .0662607865   |
| C | -.2773852519  | 3.9704219882  | .2747847409   |
| C | 3.1704757363  | 1.9590598444  | 2.3714912290  |
| C | -3.5586333588 | .9914157427   | 1.2175812792  |
| C | 2.0282207010  | 4.7433758346  | .7299309987   |
| C | -2.7117936000 | 4.1165763558  | -.0854504568  |
| C | 3.8893002347  | 2.0017204333  | .0215216806   |
| H | -1.8507614922 | -1.5348378508 | .8256496949   |
| H | -.4235634566  | 5.0439786867  | .2473335681   |
| H | -3.7352113606 | -.2216441272  | -3.8003199963 |
| H | -3.4914820716 | 3.4575993876  | 2.5524373027  |
| H | -3.7900072979 | -3.0520756443 | .8121629804   |
| H | 2.3171001862  | -3.1019364504 | -2.4009417865 |
| H | 2.6519686240  | 4.6026910799  | 1.6139716504  |
| H | -2.7503601610 | 4.4819661201  | -1.1189249590 |
| H | .2747471051   | .6516501786   | -2.9023986673 |
| H | 3.0514640831  | -3.0164473040 | -4.7557189738 |
| H | 2.3840125586  | -1.1095279309 | -6.2057292878 |
| H | 1.0004094222  | .7298219234   | -5.2645882359 |
| H | .7874387295   | -4.2173888367 | .0102653494   |
| H | 3.0547808610  | -.5787528465  | .4661240193   |
| H | 2.7131595141  | 4.8226662214  | -.1204906426  |
| H | 1.4952400491  | 5.6907115587  | .8253888388   |
| H | -3.6412665081 | 3.5829137491  | .1100033121   |
| H | -2.6626436435 | 4.9929884722  | .5656539576   |
| H | 2.5603777351  | -5.4605241476 | 1.1878374430  |
| H | 4.5962941436  | -4.2827087194 | 1.9926158253  |
| H | 4.8308577352  | -1.8288926295 | 1.6179000510  |
| H | -.2961168014  | -3.4921750231 | -2.6799873879 |
| H | 4.7524820974  | 1.6983176994  | 3.8025259315  |
| H | 6.5648456334  | 1.6418003823  | 2.1199530815  |
| H | 6.0071957802  | 1.7871820355  | -.2833773187  |
| H | -5.3584851379 | .1717801644   | 2.0602969370  |
| H | -6.4129711482 | -.3330405826  | -.1200146563  |
| H | -5.2090423456 | .1957051982   | -2.2111666788 |
| H | -2.2414067184 | -4.9998329147 | -2.6972692697 |
| H | -3.9957442387 | -4.8039109757 | -.9455327309  |
| H | -2.2650992426 | -.7709039779  | -2.9932966541 |
| H | -4.7124407085 | 2.4396421299  | 3.3279304420  |
| H | 1.1281663934  | 1.8600744548  | 2.9571858161  |
| H | 3.0196249253  | 3.5105900491  | 4.7122058126  |
| H | 2.5158125794  | 1.9574826343  | -1.6008085910 |
| H | 3.9996496454  | -.1065786787  | -1.7409734730 |
| H | -1.9179851119 | 1.5313018267  | 2.4613944893  |
| H | -2.5681089773 | .3822122641   | 4.5133300869  |
| H | -1.7651951925 | 1.6349282729  | -2.3375717113 |
| H | -2.9306402243 | 2.7421858798  | -4.2137830554 |
| H | 1.8023183564  | 4.1497630318  | 3.5969429110  |
| H | 1.2971095272  | 3.2535747986  | 5.0325648284  |
| H | 3.1267290483  | .9299506087   | 5.0910557982  |
| H | 5.3468958164  | .9333122545   | -2.2151608461 |
| H | 3.9231807792  | .8130359003   | -3.2498616556 |
| H | 5.1268622001  | 3.5068914974  | -2.0260941161 |
| H | -2.6975709226 | -.7780142892  | 3.1861308309  |
| H | -4.1529618762 | -.0392575035  | 3.8654679685  |
| H | -3.2009211214 | 2.8119675177  | 4.1738890564  |
| H | -3.5227047445 | 3.3874130710  | -2.6738503541 |
| H | -4.5002553552 | 2.2270415941  | -3.5804680182 |
| H | -2.1624351713 | .3077413244   | -4.3952902257 |
| H | 2.3605494722  | -.1532046545  | 3.9195203159  |

|    |               |               |               |
|----|---------------|---------------|---------------|
| H  | 1.3747717595  | .7324130376   | 5.0940249780  |
| H  | 3.5421437713  | 4.2273941439  | -1.7121442048 |
| H  | 3.8256725800  | 3.3366506115  | -3.2130779879 |
| N  | 1.5035159480  | 2.3269399845  | .5832142738   |
| N  | -1.5740571826 | 1.9137606146  | .0666440670   |
| P  | .5497202365   | -1.2963570465 | -.7695246647  |
| Cu | .1700924976   | .8370918518   | .2531716268   |

31. L<sup>1</sup>CuX, X = trimethylphosphine

|   |          |          |          |
|---|----------|----------|----------|
| C | -1.44148 | -3.68565 | -0.65672 |
| C | 0.75819  | -3.65818 | 1.18108  |
| C | 1.25158  | -3.37021 | -1.60375 |
| C | 3.14850  | 0.46744  | 1.41949  |
| C | 4.47278  | 0.01478  | 1.41228  |
| C | 5.19100  | -0.11110 | 0.22618  |
| C | 4.59017  | 0.24664  | -0.97757 |
| C | 3.26879  | 0.70364  | -1.02464 |
| C | 2.40220  | 0.61574  | 2.74435  |
| C | 3.19013  | 1.44784  | 3.77290  |
| C | 2.01575  | -0.75375 | 3.33143  |
| C | 2.65602  | 1.11256  | -2.36383 |
| C | 2.40375  | -0.10447 | -3.27241 |
| C | 3.50527  | 2.16829  | -3.09644 |
| C | -3.05988 | -0.09874 | -0.38363 |
| C | -3.76166 | -0.64097 | 0.72428  |
| C | -4.87257 | -1.45883 | 0.48685  |
| C | -5.30466 | -1.73454 | -0.80757 |
| C | -4.62477 | -1.17952 | -1.88867 |
| C | -3.50675 | -0.35796 | -1.70499 |
| C | -3.31397 | -0.36858 | 2.15906  |
| C | -2.70578 | -1.62602 | 2.80830  |
| C | -4.44978 | 0.19549  | 3.03216  |
| C | -2.77734 | 0.21856  | -2.91773 |
| C | -3.72211 | 0.95589  | -3.88323 |
| C | -1.98088 | -0.86927 | -3.66432 |
| C | 1.69429  | 3.45384  | 0.42179  |
| C | 0.69088  | 2.32510  | 0.23142  |
| C | -0.66605 | 2.70781  | 0.16220  |
| C | -1.82961 | 1.93408  | -0.03378 |
| C | -3.14384 | 2.69948  | -0.08639 |
| C | 2.52756  | 0.77853  | 0.18338  |
| H | -2.17707 | -3.50979 | 0.13172  |
| H | 0.78569  | -4.73487 | 0.98171  |
| H | -1.24234 | -4.76034 | -0.73404 |
| H | 0.12519  | -3.47650 | 2.05339  |
| H | -1.87647 | -3.33069 | -1.59364 |
| H | 2.24948  | -2.95106 | -1.45304 |
| H | 1.76849  | -3.31214 | 1.41389  |
| H | 0.89955  | -3.06494 | -2.59268 |
| H | 1.31213  | -4.46300 | -1.57233 |
| H | 1.19497  | 4.42173  | 0.49487  |
| H | 2.40207  | 3.49215  | -0.41280 |
| H | 2.28953  | 3.30202  | 1.32820  |
| H | -0.84153 | 3.77237  | 0.25975  |
| H | -2.98868 | 3.76886  | 0.06745  |
| H | -3.83932 | 2.33590  | 0.67698  |
| H | -3.64005 | 2.55756  | -1.05258 |
| H | 4.95368  | -0.24014 | 2.35328  |
| H | 6.21730  | -0.46830 | 0.24179  |
| H | 5.16138  | 0.17359  | -1.89990 |
| H | 1.46943  | 1.14776  | 2.53816  |
| H | 2.58126  | 1.62476  | 4.66664  |
| H | 3.47992  | 2.42109  | 3.36338  |

|    |          |          |          |
|----|----------|----------|----------|
| H  | 4.10521  | 0.94037  | 4.09770  |
| H  | 1.47907  | -0.63668 | 4.28043  |
| H  | 2.90288  | -1.37021 | 3.52044  |
| H  | 1.36554  | -1.29607 | 2.64015  |
| H  | 1.68169  | 1.56249  | -2.15609 |
| H  | 1.96018  | 0.20505  | -4.22618 |
| H  | 1.71682  | -0.80653 | -2.79302 |
| H  | 3.33579  | -0.63850 | -3.49304 |
| H  | 2.98994  | 2.51201  | -4.00037 |
| H  | 4.47726  | 1.76910  | -3.40714 |
| H  | 3.69423  | 3.04127  | -2.46326 |
| H  | -5.41011 | -1.88536 | 1.33027  |
| H  | -6.16971 | -2.37118 | -0.97311 |
| H  | -4.96979 | -1.39104 | -2.89773 |
| H  | -2.52280 | 0.38478  | 2.11797  |
| H  | -2.37055 | -1.41457 | 3.83039  |
| H  | -1.83992 | -1.97467 | 2.23692  |
| H  | -3.43350 | -2.44455 | 2.85588  |
| H  | -4.07247 | 0.45723  | 4.02716  |
| H  | -5.25927 | -0.53024 | 3.16909  |
| H  | -4.88560 | 1.09701  | 2.58940  |
| H  | -2.05175 | 0.94795  | -2.54802 |
| H  | -3.14841 | 1.43746  | -4.68291 |
| H  | -4.29696 | 1.73121  | -3.36637 |
| H  | -4.43677 | 0.27556  | -4.35957 |
| H  | -1.45037 | -0.44574 | -4.52530 |
| H  | -2.64040 | -1.66403 | -4.03334 |
| H  | -1.23577 | -1.32385 | -3.00378 |
| N  | 1.13143  | 1.07063  | 0.13669  |
| N  | -1.84181 | 0.60882  | -0.17154 |
| P  | 0.10767  | -2.73732 | -0.29107 |
| Cu | -0.14430 | -0.46140 | -0.11978 |

32.  $L^1CuXO_2$   $\eta^1$  singlet, X = trimethylphosphine

|   |          |          |          |
|---|----------|----------|----------|
| C | -3.29934 | -1.41250 | 2.64321  |
| C | -4.21628 | -1.06225 | -2.35474 |
| C | -4.85675 | -1.15876 | -0.03874 |
| C | 4.85766  | 0.28806  | -0.48226 |
| C | 4.66521  | 0.57530  | 1.89436  |
| C | -3.06279 | -0.33680 | -2.03587 |
| C | 2.71559  | 0.89263  | 0.49162  |
| C | -2.83179 | 0.00322  | -0.67563 |
| C | 2.98654  | 1.97310  | -2.71524 |
| C | 0.87633  | 2.42716  | 0.26553  |
| C | -1.62806 | 2.03122  | -0.21627 |
| C | 3.51461  | -0.47409 | -2.99085 |
| C | -0.46960 | 2.79722  | 0.05014  |
| C | 0.55425  | -2.96017 | -2.35396 |
| C | 3.30157  | 0.87800  | 1.78475  |
| C | -3.72252 | -0.42771 | 0.33691  |
| C | 1.83349  | 3.59162  | 0.46742  |
| C | -2.91720 | 2.83497  | -0.33973 |
| C | 3.49987  | 0.57570  | -0.65363 |
| C | 1.89554  | -3.27063 | 0.17725  |
| C | -0.94544 | -3.76028 | -0.01719 |
| C | -2.05927 | -0.89954 | -4.32982 |
| C | 3.03819  | 2.39671  | 3.81783  |
| C | -4.61055 | 0.73938  | 2.41384  |
| C | 2.53638  | -0.06159 | 4.01597  |
| C | -2.30994 | 1.49985  | -3.64420 |
| C | -2.07058 | 0.06524  | -3.12887 |
| C | -3.48164 | -0.12465 | 1.81536  |
| C | -5.11318 | -1.46916 | -1.36934 |

|    |          |          |          |
|----|----------|----------|----------|
| C  | 2.89295  | 0.58118  | -2.05724 |
| C  | 2.51429  | 1.15372  | 3.06632  |
| C  | 5.44414  | 0.28985  | 0.78001  |
| H  | 1.86742  | -3.13265 | 1.26143  |
| H  | 2.76238  | -2.73380 | -0.21786 |
| H  | 1.99360  | -4.33777 | -0.04837 |
| H  | -0.36517 | -2.71746 | -2.89096 |
| H  | 0.77984  | -4.02249 | -2.49877 |
| H  | 1.36624  | -2.36473 | -2.77888 |
| H  | -0.69607 | -4.78316 | -0.31883 |
| H  | -1.90930 | -3.47657 | -0.44901 |
| H  | -1.01683 | -3.70573 | 1.07173  |
| H  | -0.64729 | 3.86619  | 0.09132  |
| H  | -2.95489 | -0.78833 | -4.95151 |
| H  | -4.76461 | 1.66109  | 1.84383  |
| H  | 2.01295  | 3.75799  | 1.53324  |
| H  | -2.71978 | 3.82956  | -0.74751 |
| H  | 2.80370  | 3.40158  | 0.00437  |
| H  | 1.41629  | 4.51024  | 0.05048  |
| H  | -3.65931 | 2.33630  | -0.96395 |
| H  | -3.36021 | 2.96955  | 0.65423  |
| H  | 5.12382  | 0.56003  | 2.87925  |
| H  | 6.50030  | 0.06053  | 0.89343  |
| H  | 5.46856  | 0.05817  | -1.34982 |
| H  | -5.55027 | -1.49170 | 0.72878  |
| H  | -6.00284 | -2.03175 | -1.63957 |
| H  | -4.41631 | -1.32022 | -3.39002 |
| H  | -2.00625 | -1.94842 | -4.02116 |
| H  | -5.56378 | 0.19872  | 2.42915  |
| H  | 1.47181  | 1.32976  | 2.78927  |
| H  | 4.05775  | 2.23859  | 4.18856  |
| H  | 1.82858  | 0.34706  | -1.94767 |
| H  | 3.54851  | -1.46457 | -2.52524 |
| H  | -2.54951 | 0.44209  | 1.89274  |
| H  | -3.13802 | -1.16512 | 3.69838  |
| H  | -1.07429 | 0.04844  | -2.67022 |
| H  | -1.60052 | 1.74207  | -4.44379 |
| H  | 3.05675  | 3.29228  | 3.18953  |
| H  | 2.40503  | 2.60822  | 4.68695  |
| H  | 3.55518  | -0.27617 | 4.35914  |
| H  | 4.53822  | -0.21458 | -3.28269 |
| H  | 2.93134  | -0.54913 | -3.91557 |
| H  | 4.03245  | 2.28888  | -2.80494 |
| H  | -2.43410 | -1.98675 | 2.30575  |
| H  | -4.18654 | -2.05380 | 2.58570  |
| H  | -4.37304 | 1.01541  | 3.44730  |
| H  | -2.18704 | 2.24465  | -2.85633 |
| H  | -3.32257 | 1.59940  | -4.05187 |
| H  | -1.19685 | -0.68962 | -4.97174 |
| H  | 2.13349  | -0.95661 | 3.54078  |
| H  | 1.92845  | 0.14523  | 4.90437  |
| H  | 2.45470  | 2.73158  | -2.13640 |
| H  | 2.55225  | 1.95496  | -3.72171 |
| N  | 1.32673  | 1.17322  | 0.29239  |
| N  | -1.63834 | 0.70763  | -0.32506 |
| O  | 0.25646  | -2.06757 | 2.59578  |
| O  | 0.09768  | -0.87458 | 2.16258  |
| P  | 0.35368  | -2.56755 | -0.55667 |
| Cu | 0.00873  | -0.34506 | 0.20703  |

33.  $L^1CuXO_2$   $\eta^1$  triplet, X = trimethylphosphine

|   |          |         |         |
|---|----------|---------|---------|
| C | -3.77045 | 0.73529 | 3.07792 |
| C | 2.67154  | 1.01358 | 0.81470 |

|   |          |          |          |
|---|----------|----------|----------|
| C | -2.85208 | -0.02993 | -0.32398 |
| C | 1.49697  | 0.68168  | 4.24820  |
| C | 3.57323  | 1.69158  | -2.30347 |
| C | 0.88840  | 2.48258  | 0.15750  |
| C | -1.61502 | 2.00900  | -0.17540 |
| C | -0.45447 | 2.81062  | -0.10596 |
| C | 2.92896  | 1.19399  | 2.19974  |
| C | -3.47039 | -0.48129 | 0.86979  |
| C | 1.80229  | 3.69645  | 0.30977  |
| C | 3.43683  | 0.35721  | -1.54166 |
| C | -2.91893 | 2.79737  | -0.08571 |
| C | 3.69350  | 0.52324  | -0.04450 |
| C | 0.51848  | -2.17567 | -3.09669 |
| C | -3.37606 | 1.46883  | -3.39309 |
| C | 1.68028  | -3.56525 | -0.89140 |
| C | -1.17158 | -3.42590 | -1.11014 |
| C | -2.92802 | -0.91841 | -4.02320 |
| C | -2.58748 | -1.49947 | 3.02357  |
| C | 4.32396  | -0.70784 | -2.20724 |
| C | 2.33047  | 3.02972  | 3.85503  |
| C | 1.87466  | 1.72199  | 3.17530  |
| C | -2.80048 | 0.12561  | -2.89684 |
| C | -2.87050 | -0.20001 | 2.24550  |
| C | -5.26600 | -1.47200 | -0.44313 |
| C | 5.20694  | 0.40363  | 1.85672  |
| C | -4.64453 | -1.04496 | -1.61318 |
| C | -4.67266 | -1.19355 | 0.78285  |
| C | 4.94729  | 0.23211  | 0.49892  |
| C | 4.20206  | 0.87846  | 2.69041  |
| C | -3.43990 | -0.33195 | -1.58449 |
| H | 1.62760  | -3.87257 | 0.15468  |
| H | 2.65189  | -3.09648 | -1.06432 |
| H | 1.47546  | -1.69450 | -3.31615 |
| H | -1.27290 | -3.74489 | -0.06895 |
| H | -2.06481 | -2.85645 | -1.37729 |
| H | 1.59190  | -4.45175 | -1.52842 |
| H | -1.09648 | -4.31340 | -1.74749 |
| H | 0.49043  | -3.15095 | -3.59406 |
| H | -0.27915 | -1.54851 | -3.49825 |
| H | -0.64845 | 3.87794  | -0.14566 |
| H | -3.95794 | -1.00158 | -4.38707 |
| H | -3.97230 | 1.67330  | 2.55242  |
| H | 2.85303  | 3.42373  | 0.40385  |
| H | -2.85472 | 3.71095  | -0.68395 |
| H | 1.68643  | 4.34855  | -0.56230 |
| H | 1.51945  | 4.28569  | 1.18749  |
| H | -3.78808 | 2.22562  | -0.40928 |
| H | -3.08798 | 3.10678  | 0.95193  |
| H | 4.40748  | 1.01009  | 3.74962  |
| H | 6.18859  | 0.16932  | 2.25905  |
| H | 5.73929  | -0.13277 | -0.14741 |
| H | -5.15551 | -1.53122 | 1.69644  |
| H | -6.20355 | -2.01936 | -0.48919 |
| H | -5.10872 | -1.26866 | -2.56929 |
| H | -2.61347 | -1.91550 | -3.70040 |
| H | -4.73641 | 0.26564  | 3.29727  |
| H | 0.96748  | 1.94157  | 2.60763  |
| H | 3.18533  | 2.85795  | 4.51846  |
| H | 2.39299  | 0.03617  | -1.64658 |
| H | 4.31822  | -1.65277 | -1.65423 |
| H | -1.91355 | 0.30623  | 2.09064  |
| H | -2.09024 | -1.27640 | 3.97439  |
| H | -1.73477 | 0.28070  | -2.69288 |
| H | -2.91080 | 1.75817  | -4.34272 |



|    |          |          |          |
|----|----------|----------|----------|
| H  | 2.62774  | 3.78687  | 3.12445  |
| H  | 1.52056  | 3.44606  | 4.46498  |
| H  | 2.36201  | 0.40665  | 4.86204  |
| H  | 5.36653  | -0.38030 | -2.28758 |
| H  | 3.97587  | -0.90580 | -3.22747 |
| H  | 4.58766  | 2.09437  | -2.20169 |
| H  | -1.93944 | -2.17361 | 2.45625  |
| H  | -3.51179 | -2.04117 | 3.25414  |
| H  | -3.29541 | 0.97833  | 4.03527  |
| H  | -3.20737 | 2.27718  | -2.67979 |
| H  | -4.45661 | 1.38706  | -3.56068 |
| H  | -2.31214 | -0.62697 | -4.88164 |
| H  | 1.10535  | -0.23176 | 3.79548  |
| H  | 0.72999  | 1.08707  | 4.91857  |
| H  | 2.87168  | 2.44108  | -1.93227 |
| H  | 3.37457  | 1.54680  | -3.37224 |
| N  | -1.61521 | 0.68200  | -0.27029 |
| N  | 1.37045  | 1.24446  | 0.28375  |
| O  | 0.96619  | -1.69321 | 1.91458  |
| O  | 0.60070  | -2.84295 | 2.15474  |
| P  | 0.32899  | -2.35538 | -1.26308 |
| Cu | 0.20461  | -0.32274 | -0.15069 |

34. L<sup>1</sup>CuX, X = thiophene

|   |          |          |          |
|---|----------|----------|----------|
| C | 3.21713  | 0.75204  | 1.29215  |
| C | 4.53519  | 0.29363  | 1.18477  |
| C | 5.16331  | 0.17288  | -0.05210 |
| C | 4.46539  | 0.51570  | -1.20708 |
| C | 3.14576  | 0.97770  | -1.15386 |
| C | 2.56326  | 0.84861  | 2.66761  |
| C | 3.33760  | 1.78725  | 3.61054  |
| C | 2.39209  | -0.54069 | 3.31042  |
| C | 2.40889  | 1.29405  | -2.45337 |
| C | 2.16324  | 0.01788  | -3.28083 |
| C | 3.14096  | 2.35188  | -3.29902 |
| C | -3.08347 | 0.27871  | -0.34925 |
| C | -3.83821 | -0.27628 | 0.71364  |
| C | -4.93623 | -1.08888 | 0.40910  |
| C | -5.29629 | -1.35879 | -0.90860 |
| C | -4.54846 | -0.80817 | -1.94598 |
| C | -3.44115 | 0.00950  | -1.69481 |
| C | -3.46810 | -0.02562 | 2.17281  |
| C | -3.00247 | -1.31978 | 2.86643  |
| C | -4.62135 | 0.62327  | 2.95913  |
| C | -2.62590 | 0.54977  | -2.86752 |
| C | -3.48346 | 1.36906  | -3.84907 |
| C | -1.89440 | -0.58559 | -3.60874 |
| C | 1.72183  | 3.82362  | 0.27036  |
| C | 0.70147  | 2.69935  | 0.20773  |
| C | -0.65824 | 3.08610  | 0.16637  |
| C | -1.83952 | 2.32692  | -0.00219 |
| C | 1.54686  | -2.82907 | -0.42595 |
| C | -0.92812 | -3.20706 | -0.63404 |
| C | 1.21904  | -3.71241 | -1.40851 |
| C | -0.19729 | -3.92872 | -1.52774 |
| C | -3.13389 | 3.11236  | -0.13180 |
| C | 2.51591  | 1.09875  | 0.11090  |
| H | 1.23618  | 4.79528  | 0.37039  |
| H | 2.33985  | 3.83885  | -0.63314 |
| H | 2.40506  | 3.68420  | 1.11384  |
| H | -0.81954 | 4.15557  | 0.22104  |
| H | -2.96809 | 4.17918  | 0.02460  |
| H | -3.87719 | 2.76283  | 0.59139  |

S50

|    |          |          |          |
|----|----------|----------|----------|
| H  | -3.57456 | 2.97419  | -1.12443 |
| H  | 5.07909  | 0.02608  | 2.08690  |
| H  | 6.18742  | -0.18360 | -0.11533 |
| H  | 4.95301  | 0.41699  | -2.17332 |
| H  | 1.56386  | 1.26917  | 2.52679  |
| H  | 2.81270  | 1.88857  | 4.56670  |
| H  | 3.44858  | 2.78627  | 3.17739  |
| H  | 4.34217  | 1.40540  | 3.82295  |
| H  | 1.89120  | -0.45904 | 4.28148  |
| H  | 3.35977  | -1.02821 | 3.47264  |
| H  | 1.78900  | -1.19916 | 2.67746  |
| H  | 1.42935  | 1.70036  | -2.18933 |
| H  | 1.58996  | 0.24974  | -4.18551 |
| H  | 1.60481  | -0.72606 | -2.70522 |
| H  | 3.10852  | -0.44109 | -3.59220 |
| H  | 2.55175  | 2.60491  | -4.18721 |
| H  | 4.11610  | 1.99022  | -3.64295 |
| H  | 3.31156  | 3.27325  | -2.73320 |
| H  | -5.51946 | -1.51842 | 1.21939  |
| H  | -6.15273 | -1.99086 | -1.12519 |
| H  | -4.82596 | -1.02196 | -2.97480 |
| H  | -2.62578 | 0.67142  | 2.18236  |
| H  | -2.70816 | -1.11975 | 3.90274  |
| H  | -2.14065 | -1.75672 | 2.35227  |
| H  | -3.79823 | -2.07270 | 2.88327  |
| H  | -4.30664 | 0.85009  | 3.98361  |
| H  | -5.49133 | -0.03976 | 3.01925  |
| H  | -4.94890 | 1.55672  | 2.49074  |
| H  | -1.86003 | 1.21502  | -2.46101 |
| H  | -2.85572 | 1.79812  | -4.63770 |
| H  | -4.00035 | 2.19119  | -3.34401 |
| H  | -4.24482 | 0.74931  | -4.33511 |
| H  | -1.27289 | -0.18131 | -4.41566 |
| H  | -2.60527 | -1.29041 | -4.05496 |
| H  | -1.24715 | -1.14902 | -2.93028 |
| H  | 2.51901  | -2.46846 | -0.12064 |
| H  | -1.99975 | -3.15903 | -0.50045 |
| H  | 1.95528  | -4.19715 | -2.03926 |
| H  | -0.64349 | -4.59405 | -2.25793 |
| N  | 1.13211  | 1.43806  | 0.18328  |
| N  | -1.88333 | 0.99614  | -0.06562 |
| S  | 0.11556  | -2.26472 | 0.40625  |
| Cu | -0.20521 | 0.00192  | 0.14841  |

35.  $L^1CuXO_2$   $\eta^1$  singlet, X = thiophene

|   |          |          |          |
|---|----------|----------|----------|
| C | -1.24551 | 2.38853  | -2.63610 |
| C | 3.62467  | 1.69015  | -2.12138 |
| C | 2.70699  | 0.30627  | -4.01620 |
| C | 0.55585  | -2.60854 | 1.41395  |
| C | -0.25017 | -2.67227 | 2.57987  |
| C | 0.27485  | -3.29522 | 3.71736  |
| C | 1.55993  | -3.83129 | 3.71944  |
| C | 2.34320  | -3.75468 | 2.57037  |
| C | 1.86616  | -3.15407 | 1.40000  |
| C | -1.67911 | -2.12990 | 2.58886  |
| C | -1.96929 | -1.24288 | 3.81244  |
| C | -1.02738 | 3.62223  | -3.26336 |
| C | -2.71537 | -3.26571 | 2.48177  |
| C | 2.76500  | -3.10383 | 0.16211  |
| C | 3.26449  | -4.50137 | -0.25998 |
| C | 3.96616  | -2.16095 | 0.36951  |
| C | 1.56051  | 2.77965  | 1.34605  |
| C | 1.63451  | 0.86207  | 2.95983  |

|   |          |          |          |
|---|----------|----------|----------|
| C | 1.11033  | 3.10674  | 2.59131  |
| C | 1.15514  | 2.01138  | 3.51472  |
| C | -0.97883 | -0.67549 | -3.99377 |
| C | -0.65374 | -0.78964 | -2.50768 |
| C | 0.24225  | 4.02095  | -3.66883 |
| C | -0.77044 | -2.10733 | -2.01238 |
| C | -0.39897 | -2.65132 | -0.77231 |
| C | -0.48864 | -4.16731 | -0.67454 |
| C | -0.13022 | 1.54134  | -2.41941 |
| C | 1.32897  | 3.17778  | -3.45003 |
| C | 1.16964  | 1.93415  | -2.82847 |
| C | -2.67302 | 1.99514  | -2.24741 |
| C | -3.57386 | 1.81081  | -3.48792 |
| C | -3.30999 | 3.01059  | -1.27857 |
| C | 2.36867  | 0.99717  | -2.67762 |
| H | -0.35211 | -1.37329 | -4.55877 |
| H | -0.83450 | 0.32579  | -4.39380 |
| H | -2.01864 | -0.97489 | -4.16395 |
| H | -1.12675 | -2.82836 | -2.74038 |
| H | -1.25622 | -4.54367 | -1.35406 |
| H | -0.71809 | -4.49972 | 0.33953  |
| H | 0.46077  | -4.63071 | -0.96123 |
| H | -1.87325 | 4.27868  | -3.44670 |
| H | 0.38339  | 4.97956  | -4.16081 |
| H | 2.31553  | 3.48491  | -3.78321 |
| H | -2.62658 | 1.03752  | -1.72286 |
| H | -4.57071 | 1.46667  | -3.18941 |
| H | -3.16321 | 1.08107  | -4.19069 |
| H | -3.70049 | 2.75477  | -4.03003 |
| H | -4.29542 | 2.65641  | -0.95796 |
| H | -3.44882 | 3.98753  | -1.75587 |
| H | -2.69224 | 3.14104  | -0.38857 |
| H | 2.08461  | 0.21280  | -1.96930 |
| H | 4.40665  | 0.94906  | -1.92473 |
| H | 3.42487  | 2.21995  | -1.18494 |
| H | 4.03899  | 2.41430  | -2.83082 |
| H | 3.53231  | -0.40374 | -3.88801 |
| H | 3.01248  | 1.04385  | -4.76690 |
| H | 1.85132  | -0.24207 | -4.41895 |
| H | -0.33679 | -3.36836 | 4.61240  |
| H | 1.94802  | -4.31407 | 4.61198  |
| H | 3.34506  | -4.17625 | 2.58011  |
| H | -1.80164 | -1.49761 | 1.70630  |
| H | -2.96780 | -0.80218 | 3.72323  |
| H | -1.25039 | -0.42018 | 3.88294  |
| H | -1.93726 | -1.80974 | 4.75028  |
| H | -3.73021 | -2.85441 | 2.44529  |
| H | -2.65674 | -3.94085 | 3.34283  |
| H | -2.56687 | -3.86484 | 1.57764  |
| H | 2.17697  | -2.69967 | -0.66591 |
| H | 3.81854  | -4.43952 | -1.20363 |
| H | 2.43962  | -5.20622 | -0.40014 |
| H | 3.93965  | -4.93217 | 0.48776  |
| H | 4.58164  | -2.11841 | -0.53656 |
| H | 4.60646  | -2.50547 | 1.18914  |
| H | 3.64287  | -1.14279 | 0.60311  |
| H | 1.61299  | 3.39161  | 0.45524  |
| H | 1.76975  | -0.11410 | 3.40630  |
| H | 0.74793  | 4.09654  | 2.84779  |
| H | 0.83705  | 2.08344  | 4.54922  |
| N | -0.27975 | 0.26346  | -1.78742 |
| N | 0.03750  | -1.93823 | 0.26673  |
| S | 2.04370  | 1.11164  | 1.28408  |
| O | -2.42033 | 0.96686  | 1.12407  |

|    |          |         |         |
|----|----------|---------|---------|
| O  | -1.25932 | 1.45754 | 0.86714 |
| Cu | -0.13642 | 0.04171 | 0.26534 |

36.  $L^1CuXO_2$   $\eta^1$  triplet, X = thiophene

|   |          |          |          |
|---|----------|----------|----------|
| C | -0.99758 | 2.41129  | -2.43756 |
| C | 3.71987  | 1.43071  | -2.05864 |
| C | 2.93426  | 0.27124  | -4.16311 |
| C | 0.52984  | -2.82210 | 1.54673  |
| C | -0.33104 | -2.98817 | 2.66176  |
| C | 0.17134  | -3.61136 | 3.81044  |
| C | 1.48870  | -4.05536 | 3.87994  |
| C | 2.33129  | -3.86869 | 2.78739  |
| C | 1.87977  | -3.25488 | 1.61262  |
| C | -1.77224 | -2.47968 | 2.65503  |
| C | -1.99734 | -1.41693 | 3.74893  |
| C | -0.74159 | 3.64665  | -3.04770 |
| C | -2.79936 | -3.61989 | 2.79981  |
| C | 2.85562  | -3.03401 | 0.45885  |
| C | 3.39514  | -4.36524 | -0.10315 |
| C | 4.02092  | -2.10915 | 0.87617  |
| C | 1.18608  | 2.94662  | 1.11020  |
| C | 1.41600  | 1.44046  | 3.10057  |
| C | 0.82244  | 3.54771  | 2.27518  |
| C | 0.95504  | 2.68633  | 3.41398  |
| C | -0.99495 | -0.67531 | -3.87620 |
| C | -0.61971 | -0.85897 | -2.41250 |
| C | 0.50948  | 3.95683  | -3.57242 |
| C | -0.78671 | -2.16771 | -1.89823 |
| C | -0.43396 | -2.77194 | -0.66760 |
| C | -0.62181 | -4.27882 | -0.59229 |
| C | 0.05101  | 1.45164  | -2.36726 |
| C | 1.53768  | 3.02267  | -3.47687 |
| C | 1.33846  | 1.77266  | -2.87659 |
| C | -2.39133 | 2.15576  | -1.86113 |
| C | -3.49436 | 2.18645  | -2.94383 |
| C | -2.72705 | 3.17106  | -0.74587 |
| C | 2.51209  | 0.80044  | -2.77888 |
| H | -1.32589 | -1.61342 | -4.32392 |
| H | -0.14816 | -0.29341 | -4.45411 |
| H | -1.79829 | 0.05987  | -3.98192 |
| H | -1.20589 | -2.86279 | -2.61552 |
| H | -1.21877 | -4.64425 | -1.42946 |
| H | -1.10954 | -4.56926 | 0.34228  |
| H | 0.34692  | -4.79025 | -0.61493 |
| H | -1.54178 | 4.38182  | -3.11027 |
| H | 0.68342  | 4.92052  | -4.04590 |
| H | 2.51908  | 3.26923  | -3.87590 |
| H | -2.38838 | 1.15408  | -1.41954 |
| H | -4.46993 | 1.94229  | -2.50662 |
| H | -3.30077 | 1.46583  | -3.74600 |
| H | -3.58037 | 3.17979  | -3.40417 |
| H | -3.68878 | 2.92591  | -0.28017 |
| H | -2.80505 | 4.19053  | -1.14562 |
| H | -1.96067 | 3.17644  | 0.03766  |
| H | 2.18007  | -0.05339 | -2.18062 |
| H | 4.51663  | 0.68911  | -1.92820 |
| H | 3.44903  | 1.80798  | -1.06784 |
| H | 4.14109  | 2.26831  | -2.62724 |
| H | 3.75662  | -0.44744 | -4.06740 |
| H | 3.27773  | 1.08635  | -4.81091 |
| H | 2.10678  | -0.23139 | -4.67333 |
| H | -0.48358 | -3.74781 | 4.66797  |
| H | 1.85882  | -4.53650 | 4.78243  |

|    |          |          |          |
|----|----------|----------|----------|
| H  | 3.36491  | -4.20214 | 2.84882  |
| H  | -1.94948 | -2.00509 | 1.68596  |
| H  | -3.01178 | -1.00671 | 3.68418  |
| H  | -1.29257 | -0.58554 | 3.64849  |
| H  | -1.87407 | -1.84326 | 4.75128  |
| H  | -3.82134 | -3.22473 | 2.74028  |
| H  | -2.69875 | -4.13396 | 3.76362  |
| H  | -2.68415 | -4.36981 | 2.01026  |
| H  | 2.31048  | -2.52661 | -0.34459 |
| H  | 4.04248  | -4.17872 | -0.96770 |
| H  | 2.58165  | -5.02736 | -0.42490 |
| H  | 3.98805  | -4.91128 | 0.64309  |
| H  | 4.68511  | -1.91420 | 0.02562  |
| H  | 4.62733  | -2.56149 | 1.67357  |
| H  | 3.65609  | -1.14197 | 1.23998  |
| H  | 1.18457  | 3.34272  | 0.10630  |
| H  | 1.61801  | 0.59875  | 3.74829  |
| H  | 0.46965  | 4.57389  | 2.33123  |
| H  | 0.71655  | 2.99259  | 4.42501  |
| N  | -0.15769 | 0.18771  | -1.72433 |
| N  | 0.06802  | -2.12931 | 0.38660  |
| S  | 1.72534  | 1.30471  | 1.39041  |
| O  | -2.81359 | 0.40088  | 1.10695  |
| O  | -1.67768 | 0.76622  | 1.38802  |
| Cu | 0.23042  | -0.19254 | 0.18414  |

37. L<sup>1</sup>CuX, X = pyridine

|    |          |          |          |
|----|----------|----------|----------|
| Cu | -0.24104 | 1.35244  | -0.22064 |
| N  | 1.05638  | 2.86086  | -0.28322 |
| N  | -1.94047 | 2.38362  | -0.21815 |
| C  | 1.63443  | 5.25190  | -0.34050 |
| C  | 0.62048  | 4.11936  | -0.30036 |
| C  | -0.74113 | 4.49679  | -0.28338 |
| C  | -1.91749 | 3.71536  | -0.24870 |
| C  | -3.23405 | 4.47637  | -0.24853 |
| C  | 2.44372  | 2.54193  | -0.30447 |
| C  | 3.14076  | 2.34969  | 0.91560  |
| C  | 4.46543  | 1.90064  | 0.87207  |
| C  | 5.10599  | 1.64555  | -0.33837 |
| C  | 4.41614  | 1.84485  | -1.53194 |
| C  | 3.09053  | 2.29376  | -1.54211 |
| C  | 2.45400  | 2.57449  | 2.25995  |
| C  | 3.28633  | 3.44289  | 3.21853  |
| C  | 2.08492  | 1.23257  | 2.92172  |
| C  | 2.35543  | 2.46737  | -2.86881 |
| C  | 2.00173  | 1.10230  | -3.48999 |
| C  | 3.13651  | 3.33493  | -3.87081 |
| C  | -3.16101 | 1.65102  | -0.19184 |
| C  | -3.72488 | 1.26582  | 1.05135  |
| C  | -4.84712 | 0.42971  | 1.05268  |
| C  | -5.41648 | -0.02243 | -0.13561 |
| C  | -4.86037 | 0.36694  | -1.35180 |
| C  | -3.73845 | 1.20159  | -1.40670 |
| C  | -3.09843 | 1.70681  | 2.37147  |
| C  | -2.30636 | 0.55356  | 3.01790  |
| C  | -4.12768 | 2.28027  | 3.36001  |
| C  | -3.13131 | 1.57419  | -2.75673 |
| C  | -4.17103 | 2.13381  | -3.74282 |
| C  | -2.38228 | 0.37778  | -3.37489 |
| C  | 1.33513  | -1.16236 | -0.22649 |
| N  | 0.08473  | -0.65577 | -0.19331 |
| C  | -0.95145 | -1.51832 | -0.13889 |
| C  | -0.77835 | -2.89899 | -0.11592 |

S54

|   |          |          |          |
|---|----------|----------|----------|
| C | 1.59076  | -2.52982 | -0.20716 |
| C | 0.51562  | -3.41668 | -0.15067 |
| H | 1.14248  | 6.22508  | -0.37562 |
| H | 2.28873  | 5.16083  | -1.21356 |
| H | 2.28482  | 5.22410  | 0.54032  |
| H | -0.91177 | 5.56616  | -0.30248 |
| H | -3.07026 | 5.55464  | -0.27715 |
| H | -3.82313 | 4.23807  | 0.64340  |
| H | -3.84760 | 4.19526  | -1.11082 |
| H | 5.00484  | 1.74555  | 1.80249  |
| H | 6.13547  | 1.29894  | -0.35126 |
| H | 4.91681  | 1.64673  | -2.47589 |
| H | 1.51733  | 3.10316  | 2.06499  |
| H | 2.71477  | 3.65737  | 4.12806  |
| H | 3.56107  | 4.39703  | 2.75751  |
| H | 4.21174  | 2.94353  | 3.52541  |
| H | 1.56247  | 1.39730  | 3.87090  |
| H | 2.98064  | 0.63532  | 3.12823  |
| H | 1.42815  | 0.64487  | 2.27324  |
| H | 1.41198  | 2.97680  | -2.65607 |
| H | 1.44970  | 1.23309  | -4.42763 |
| H | 1.37695  | 0.51459  | -2.81078 |
| H | 2.90499  | 0.52101  | -3.70854 |
| H | 2.53678  | 3.50798  | -4.77105 |
| H | 4.06944  | 2.85556  | -4.18668 |
| H | 3.39262  | 4.30893  | -3.44178 |
| H | -5.28217 | 0.12537  | 2.00073  |
| H | -6.28906 | -0.66918 | -0.11382 |
| H | -5.30523 | 0.01359  | -2.27811 |
| H | -2.38138 | 2.50005  | 2.14486  |
| H | -1.83202 | 0.88129  | 3.94989  |
| H | -1.51921 | 0.19621  | 2.34723  |
| H | -2.96275 | -0.29262 | 3.25203  |
| H | -3.62154 | 2.67079  | 4.24951  |
| H | -4.83979 | 1.51959  | 3.69802  |
| H | -4.70207 | 3.09667  | 2.91062  |
| H | -2.39074 | 2.35793  | -2.57772 |
| H | -3.67923 | 2.47122  | -4.66168 |
| H | -4.71044 | 2.98482  | -3.31492 |
| H | -4.91268 | 1.37954  | -4.02733 |
| H | -1.91928 | 0.65890  | -4.32756 |
| H | -3.06335 | -0.45986 | -3.56472 |
| H | -1.59070 | 0.02547  | -2.70670 |
| H | 2.14117  | -0.43752 | -0.27072 |
| H | -1.94063 | -1.07365 | -0.11417 |
| H | -1.64676 | -3.54701 | -0.07193 |
| H | 2.61551  | -2.88355 | -0.23602 |
| H | 0.68334  | -4.48914 | -0.13426 |

38.  $L^1CuXO_2$   $\eta^1$  singlet, X = pyridine

|    |          |          |          |
|----|----------|----------|----------|
| Cu | -0.44257 | 0.07037  | 0.45367  |
| O  | 0.33082  | -2.57648 | 1.32489  |
| O  | -0.59926 | -1.69547 | 1.30430  |
| N  | 0.25748  | 0.95507  | 2.10587  |
| N  | -1.77001 | 1.46417  | -0.08710 |
| C  | 0.07922  | 2.65146  | 3.90671  |
| C  | -0.38110 | 2.00824  | 2.60621  |
| C  | -1.49895 | 2.63679  | 2.01329  |
| C  | -2.12232 | 2.42093  | 0.77116  |
| C  | -3.23864 | 3.38494  | 0.40589  |
| C  | 1.40695  | 0.37890  | 2.72708  |
| C  | 1.30227  | -0.48771 | 3.84536  |
| C  | 2.47898  | -1.04252 | 4.36550  |

|   |          |          |          |
|---|----------|----------|----------|
| C | 3.72269  | -0.77481 | 3.80695  |
| C | 3.81252  | 0.06390  | 2.69802  |
| C | 2.67305  | 0.64651  | 2.13692  |
| C | -0.02707 | -0.83749 | 4.51031  |
| C | -0.10290 | -0.29606 | 5.95280  |
| C | -0.28345 | -2.35738 | 4.52326  |
| C | 2.79880  | 1.60183  | 0.95233  |
| C | 3.94685  | 1.25210  | -0.00807 |
| C | 2.94392  | 3.06177  | 1.42837  |
| C | -2.33473 | 1.39842  | -1.39517 |
| C | -3.33872 | 0.43466  | -1.66649 |
| C | -3.79722 | 0.29599  | -2.98193 |
| C | -3.28535 | 1.07718  | -4.01435 |
| C | -2.30246 | 2.02427  | -3.73585 |
| C | -1.81313 | 2.20834  | -2.43767 |
| C | -3.92481 | -0.44695 | -0.56709 |
| C | -3.61689 | -1.93729 | -0.80520 |
| C | -5.43926 | -0.22034 | -0.40435 |
| C | -0.70674 | 3.23189  | -2.18842 |
| C | -1.06457 | 4.62536  | -2.73560 |
| C | 0.64028  | 2.75658  | -2.76731 |
| C | 1.64910  | -1.57882 | -0.97914 |
| N | 0.51977  | -0.89703 | -1.24262 |
| C | 0.00364  | -0.97150 | -2.48332 |
| C | 2.30831  | -2.34125 | -1.94068 |
| C | 0.59552  | -1.71712 | -3.49909 |
| C | 1.77146  | -2.41405 | -3.22447 |
| H | 0.08624  | 3.73955  | 3.80016  |
| H | 1.07199  | 2.31876  | 4.20707  |
| H | -0.62238 | 2.40866  | 4.71093  |
| H | -1.90456 | 3.46025  | 2.58968  |
| H | -3.60091 | 3.91218  | 1.29008  |
| H | -4.07587 | 2.86235  | -0.06321 |
| H | -2.88569 | 4.13286  | -0.31226 |
| H | 2.41189  | -1.70548 | 5.22299  |
| H | 4.61939  | -1.21927 | 4.22924  |
| H | 4.78624  | 0.26952  | 2.26548  |
| H | -0.82531 | -0.37636 | 3.92272  |
| H | -1.08947 | -0.50178 | 6.38266  |
| H | 0.07349  | 0.78091  | 6.00683  |
| H | 0.64212  | -0.78335 | 6.59161  |
| H | -1.30122 | -2.56029 | 4.87528  |
| H | 0.40513  | -2.86665 | 5.20762  |
| H | -0.15835 | -2.78656 | 3.52914  |
| H | 1.86376  | 1.54071  | 0.38518  |
| H | 3.88372  | 1.87831  | -0.90405 |
| H | 3.91000  | 0.20577  | -0.32523 |
| H | 4.92879  | 1.43282  | 0.44240  |
| H | 3.01268  | 3.74087  | 0.57100  |
| H | 3.85163  | 3.18257  | 2.03035  |
| H | 2.09258  | 3.37511  | 2.03706  |
| H | -4.56762 | -0.43882 | -3.19911 |
| H | -3.65219 | 0.95183  | -5.02901 |
| H | -1.90301 | 2.63029  | -4.54429 |
| H | -3.44703 | -0.16188 | 0.37369  |
| H | -4.03489 | -2.54516 | 0.00438  |
| H | -2.53900 | -2.11989 | -0.83398 |
| H | -4.05117 | -2.29114 | -1.74720 |
| H | -5.82537 | -0.81535 | 0.43023  |
| H | -5.98993 | -0.51455 | -1.30465 |
| H | -5.66799 | 0.83142  | -0.20408 |
| H | -0.57371 | 3.32512  | -1.10787 |
| H | -0.29388 | 5.35190  | -2.45683 |
| H | -2.02280 | 4.97925  | -2.34244 |

|   |          |          |          |
|---|----------|----------|----------|
| H | -1.13560 | 4.62681  | -3.82855 |
| H | 1.42547  | 3.49372  | -2.56474 |
| H | 0.57972  | 2.62124  | -3.85315 |
| H | 0.94632  | 1.80462  | -2.32578 |
| H | 2.02440  | -1.51634 | 0.03571  |
| H | -0.91097 | -0.41781 | -2.65803 |
| H | 3.21809  | -2.86882 | -1.67586 |
| H | 0.13549  | -1.74484 | -4.48080 |
| H | 2.25801  | -3.00444 | -3.99511 |

39. L<sup>1</sup>CuXO<sub>2</sub> η<sup>1</sup> triplet, X = pyridine

|    |               |               |               |
|----|---------------|---------------|---------------|
| Cu | - .4453654278 | .0275785623   | .4573310107   |
| O  | -1.2539054443 | -2.9235156174 | 1.1058593322  |
| O  | -1.5258919098 | -1.7454627279 | 1.3779154199  |
| N  | .2522233119   | .9561363058   | 2.1060983909  |
| N  | -1.8252027677 | 1.4081938888  | -.0749224344  |
| C  | .0891730185   | 2.6945991641  | 3.8739157524  |
| C  | -.3967699163  | 2.0020800050  | 2.6062982213  |
| C  | -1.5588891535 | 2.5757737789  | 2.0376311255  |
| C  | -2.1737426076 | 2.3640473523  | .7872676383   |
| C  | -3.2708414015 | 3.3482442803  | .4117037008   |
| C  | 1.4912983311  | .4975926866   | 2.6451996888  |
| C  | 1.5187598210  | -.4656662997  | 3.6851012410  |
| C  | 2.7594744459  | -.9317811657  | 4.1371521902  |
| C  | 3.9532727995  | -.4790125365  | 3.5839344877  |
| C  | 3.9153174679  | .4507176040   | 2.5480475790  |
| C  | 2.7031782230  | .9456149437   | 2.0558818585  |
| C  | .2411310942   | -.9972107625  | 4.3277472588  |
| C  | .0958452095   | -.5179280289  | 5.7851349080  |
| C  | .1605095658   | -2.5336971848 | 4.2645731462  |
| C  | 2.7041442711  | 1.9710449688  | .9255325896   |
| C  | 3.6687367146  | 1.6016460502  | -.2144091929  |
| C  | 3.0139960014  | 3.3851381674  | 1.4530375531  |
| C  | -2.3305748675 | 1.3966304424  | -1.4076638367 |
| C  | -3.3727517516 | .5031977037   | -1.7651259777 |
| C  | -3.7838753995 | .4423070920   | -3.1018980160 |
| C  | -3.1896617272 | 1.2309767874  | -4.0830749364 |
| C  | -2.1610202975 | 2.0988628534  | -3.7264889332 |
| C  | -1.7146419666 | 2.2010963037  | -2.4043378840 |
| C  | -4.0531875677 | -.3865175518  | -.7294408739  |
| C  | -3.9424108178 | -1.8781912250 | -1.0950963050 |
| C  | -5.5273879879 | .0077381018   | -.5201829634  |
| C  | -.5537530620  | 3.1405441012  | -2.0836233340 |
| C  | -.8338139639  | 4.5906211092  | -2.5194664297 |
| C  | .7595111803   | 2.6397318227  | -2.7148668503 |
| C  | 1.6336812309  | -1.8844284602 | -.4608531410  |
| N  | .5587361388   | -1.1841735749 | -.8735135179  |
| C  | .1871938146   | -1.2799834658 | -2.1653393373 |
| C  | 2.3712994834  | -2.6975695443 | -1.3165848391 |
| C  | .8713150513   | -2.0722179252 | -3.0831136107 |
| C  | 1.9840151637  | -2.7938583979 | -2.6529855137 |
| H  | .1776270863   | 3.7720856633  | 3.7061129588  |
| H  | 1.0508173857  | 2.3141204894  | 4.2164905678  |
| H  | -.6429724038  | 2.5544880316  | 4.6767575930  |
| H  | -1.9826847719 | 3.3868566353  | 2.6196688053  |
| H  | -3.6142739541 | 3.9040619662  | 1.2859300916  |
| H  | -4.1250087773 | 2.8389930453  | -.0416981732  |
| H  | -2.9061031722 | 4.0711100044  | -.3257128523  |
| H  | 2.7879703685  | -1.6618172128 | 4.9414399490  |
| H  | 4.9052326950  | -.8476115716  | 3.9552390471  |
| H  | 4.8472783754  | .8017529347   | 2.1145758878  |
| H  | -.6026602018  | -.5994173900  | 3.7576750964  |
| H  | -.8487869097  | -.8710810300  | 6.2133441503  |



|   |               |               |               |
|---|---------------|---------------|---------------|
| H | .1127448304   | .5730958312   | 5.8545615457  |
| H | .9099122424   | -.9027352207  | 6.4097289157  |
| H | -.8033972675  | -2.8796400066 | 4.6531826354  |
| H | .9457178227   | -3.0029288772 | 4.8674432344  |
| H | .2605814500   | -2.8983363388 | 3.2390818285  |
| H | 1.6932963139  | 1.9914244968  | .5077959335   |
| H | 3.5521970040  | 2.3012206761  | -1.0484541209 |
| H | 3.4745890460  | .5925618784   | -.5909962591  |
| H | 4.7163358634  | 1.6459414441  | .1020754256   |
| H | 2.9779060376  | 4.1188435155  | .6396954910   |
| H | 4.0142617919  | 3.4255296137  | 1.8993820962  |
| H | 2.2957671733  | 3.6928918135  | 2.2178909231  |
| H | -4.5871503678 | -.2357231724  | -3.3774415255 |
| H | -3.5240206451 | 1.1700850060  | -5.1147399482 |
| H | -1.6894331602 | 2.7091358768  | -4.4923747631 |
| H | -3.5319419160 | -.2396155103  | .2199192558   |
| H | -4.3677056247 | -2.5000485208 | -.3002612233  |
| H | -2.8996951472 | -2.1782805982 | -1.2330995384 |
| H | -4.4832139044 | -2.1071481834 | -2.0200416535 |
| H | -5.9862961577 | -.6177402547  | .2534036077   |
| H | -6.1081443565 | -.1187478134  | -1.4408775769 |
| H | -5.6234126127 | 1.0525305764  | -.2090596548  |
| H | -.4126939759  | 3.1397144459  | -1.0001160671 |
| H | -.0170905202  | 5.2484916129  | -2.2027511763 |
| H | -1.7624521700 | 4.9721202922  | -2.0840552542 |
| H | -.9214237434  | 4.6753987359  | -3.6081480387 |
| H | 1.5899817493  | 3.3055495504  | -2.4543898455 |
| H | .6883919777   | 2.6070066667  | -3.8079027009 |
| H | 1.0100641591  | 1.6344233145  | -2.3640297627 |
| H | 1.9045261806  | -1.7735386631 | .5840605991   |
| H | -.6813264995  | -.6988297180  | -2.4574575531 |
| H | 3.2315564249  | -3.2371435357 | -.9357993394  |
| H | .5328005435   | -2.1136515869 | -4.1126108612 |
| H | 2.5395240563  | -3.4185120007 | -3.3457676223 |

40.  $L^1CuXO_2$   $\eta^2$  singlet, X = pyridine

|    |               |               |               |
|----|---------------|---------------|---------------|
| Cu | .4878874631   | -.5656532197  | -.7745956039  |
| O  | 1.3135606528  | -2.3894141837 | -.4657295302  |
| O  | -.0051475859  | -2.3856645950 | -.6194450849  |
| N  | -1.0637821548 | .0425064493   | -1.8718766659 |
| N  | 1.7711968901  | .8064675239   | -1.3462542428 |
| N  | .1696780274   | -.5429619963  | 1.5055455751  |
| C  | -1.9809696370 | 1.1151896706  | -3.8980500586 |
| C  | -.8510782742  | .8297828255   | -2.9218895830 |
| C  | .3889451090   | 1.4160140604  | -3.2465597395 |
| C  | 1.5754478682  | 1.4529658545  | -2.4981511146 |
| C  | 2.6682743519  | 2.3568357336  | -3.0436225482 |
| C  | -2.3851194214 | -.4303201907  | -1.5630372437 |
| C  | -2.8973724445 | -1.6225783008 | -2.1316862583 |
| C  | -4.1914597328 | -2.0268969860 | -1.7758439581 |
| C  | -4.9745268023 | -1.2884999362 | -.8976998365  |
| C  | -4.4664497778 | -.1142915097  | -.3499978406  |
| C  | -3.1773587202 | .3317785744   | -.6594123040  |
| C  | -2.1221404928 | -2.4792879650 | -3.1290052910 |
| C  | -2.8381033444 | -2.5258888555 | -4.4963405928 |
| C  | -1.9138010235 | -3.9181647125 | -2.6207018512 |
| C  | -2.6731571892 | 1.6367322426  | -.0434535936  |
| C  | -2.9980953286 | 1.7582260111  | 1.4562747937  |
| C  | -3.2237875369 | 2.8675116957  | -.7922795726  |
| C  | 2.8049260421  | 1.2184365056  | -.4496700394  |
| C  | 3.9005773631  | .3536247541   | -.2095577462  |
| C  | 4.8559841632  | .7329548971   | .7405147338   |
| C  | 4.7447832374  | 1.9278774945  | 1.4442139208  |

|   |               |               |               |
|---|---------------|---------------|---------------|
| C | 3.6667408627  | 2.7737896057  | 1.1979796347  |
| C | 2.6800888186  | 2.4453515160  | .2610448810   |
| C | 4.0835057276  | -.9387623342  | -.9972460615  |
| C | 4.4239264700  | -2.1385382166 | -.0967666616  |
| C | 5.1448174340  | -.7677688136  | -2.1010516369 |
| C | 1.4994759667  | 3.4021373187  | .0753191828   |
| C | 1.9534299989  | 4.8500703995  | -.1946060697  |
| C | .5485197533   | 3.3750016623  | 1.2876531488  |
| C | -.8845644565  | -1.2390420791 | 1.9656544024  |
| C | 1.0263092906  | -.0322908738  | 2.4063714942  |
| C | -1.1230567445 | -1.4465441702 | 3.3233157016  |
| C | .8698198913   | -.1975749949  | 3.7809282530  |
| C | -.2252840717  | -.9207262684  | 4.2511162812  |
| H | -1.7746341590 | 2.0205216717  | -4.4714371597 |
| H | -2.9432418707 | 1.2192742381  | -3.3959476434 |
| H | -2.0745506450 | .2851324078   | -4.6055734396 |
| H | .4066882220   | 1.9749848883  | -4.1737829220 |
| H | 2.5694784730  | 2.4524572152  | -4.1267486013 |
| H | 3.6622191143  | 1.9738199033  | -2.8066610468 |
| H | 2.5935657695  | 3.3612357720  | -2.6151992868 |
| H | -4.5920868768 | -2.9409657533 | -2.2039241167 |
| H | -5.9768010404 | -1.6224423989 | -.6441469524  |
| H | -5.0803455180 | .4656213213   | .3320460424   |
| H | -1.1375427328 | -2.0257236171 | -3.2700413770 |
| H | -2.2245648387 | -3.0610995260 | -5.2288882671 |
| H | -3.0470552241 | -1.5281579637 | -4.8930629608 |
| H | -3.7959645920 | -3.0521639905 | -4.4206040238 |
| H | -1.3179636904 | -4.4878365785 | -3.3421990875 |
| H | -2.8711114184 | -4.4380153348 | -2.5014459708 |
| H | -1.3901291118 | -3.9243599429 | -1.6645304081 |
| H | -1.5851682855 | 1.6463638015  | -.1491462998  |
| H | -2.5071875795 | 2.6439229860  | 1.8727110539  |
| H | -2.6555457065 | .8851161823   | 2.0172598541  |
| H | -4.0726909200 | 1.8737187232  | 1.6343727847  |
| H | -2.8436619466 | 3.7911480933  | -.3413814521  |
| H | -4.3184120028 | 2.8952949578  | -.7443952565  |
| H | -2.9350362231 | 2.8697009623  | -1.8462382232 |
| H | 5.7035851830  | .0810866330   | .9273680704   |
| H | 5.4970122165  | 2.2018845550  | 2.1784243094  |
| H | 3.5816393426  | 3.7042183191  | 1.7517624571  |
| H | 3.1348092154  | -1.1681237748 | -1.4856174455 |
| H | 4.4238827859  | -3.0577524847 | -.6911618250  |
| H | 3.6807933197  | -2.2565676563 | .6957537203   |
| H | 5.4143711034  | -2.0430436699 | .3621362076   |
| H | 5.2559272556  | -1.6984684273 | -2.6680376438 |
| H | 6.1220783314  | -.5146912253  | -1.6743674630 |
| H | 4.8726104345  | .0242040484   | -2.8056468812 |
| H | .9228144330   | 3.0759265147  | -.7927333589  |
| H | 1.0902703286  | 5.4720931539  | -.4546125534  |
| H | 2.6740760354  | 4.9083792512  | -1.0159933249 |
| H | 2.4229629182  | 5.2979679545  | .6875557898   |
| H | -.2871058911  | 4.0662814604  | 1.1298911325  |
| H | 1.0662895083  | 3.6807398859  | 2.2037525777  |
| H | .1360038450   | 2.3773252094  | 1.4505992695  |
| H | -1.5449203810 | -1.6515680692 | 1.2115959391  |
| H | 1.8695580724  | .5196182353   | 2.0064414913  |
| H | -1.9923553534 | -2.0157363787 | 3.6356281004  |
| H | 1.5978170342  | .2319243456   | 4.4609543509  |
| H | -.3778041213  | -1.0662994622 | 5.3164502972  |

41. L<sup>1</sup>CuXO<sub>2</sub> η<sup>2</sup> triplet, X = pyridine

|    |              |               |              |
|----|--------------|---------------|--------------|
| Cu | .4014453688  | -.4725916857  | -.7260920453 |
| O  | 1.2174896454 | -2.6278375402 | -.4809793851 |

|   |               |               |               |
|---|---------------|---------------|---------------|
| O | - .0540263141 | -2.4376301373 | - .5277417445 |
| N | -1.1076062839 | .0387511562   | -1.9685953764 |
| N | 1.7137073823  | .8902269393   | -1.3275739286 |
| N | .2565607211   | -.5081175850  | 1.5615215640  |
| C | -1.9098193573 | .9990462777   | -4.1031934859 |
| C | -.8395327011  | .7620215483   | -3.0490922049 |
| C | .4173356848   | 1.3444241649  | -3.3309870850 |
| C | 1.5580477036  | 1.4726532343  | -2.5192156352 |
| C | 2.6474027236  | 2.3865335693  | -3.0565095416 |
| C | -2.4230399471 | -.4291928732  | -1.6573875203 |
| C | -2.9329380083 | -1.6362659654 | -2.1972910273 |
| C | -4.2010102968 | -2.0685541899 | -1.7865221398 |
| C | -4.9551974660 | -1.3498131379 | -.8672623148  |
| C | -4.4423835254 | -.1686299879  | -.3363908138  |
| C | -3.1827743997 | .3099228302   | -.7100624183  |
| C | -2.1738575361 | -2.4755219917 | -3.2224570813 |
| C | -2.9105874046 | -2.5094258317 | -4.5778211748 |
| C | -1.9314831848 | -3.9176793316 | -2.7322526441 |
| C | -2.6576531030 | 1.6236926715  | -.1361672649  |
| C | -3.0939007866 | 1.8807502440  | 1.3148207741  |
| C | -3.0641797901 | 2.8213851163  | -1.0190407075 |
| C | 2.7677879464  | 1.2755802685  | -.4452838596  |
| C | 3.8736923580  | .4074240258   | -.2503716872  |
| C | 4.8491329865  | .7622117026   | .6887195782   |
| C | 4.7485811540  | 1.9340195311  | 1.4335553619  |
| C | 3.6578931053  | 2.7761400869  | 1.2389495552  |
| C | 2.6567133324  | 2.4738565503  | .3079313112   |
| C | 4.0363554174  | -.8798342882  | -1.0528697017 |
| C | 4.3566917989  | -2.0925284481 | -.1617066559  |
| C | 5.1042582666  | -.7215193272  | -2.1517935400 |
| C | 1.4676795848  | 3.4226153383  | .1673600267   |
| C | 1.9090862232  | 4.8649408445  | -.1471834833  |
| C | .5799942482   | 3.4066073438  | 1.4271242462  |
| C | -.8768879687  | -1.0217695775 | 2.0772646231  |
| C | 1.2590246789  | -.2051750810  | 2.4056162386  |
| C | -1.0573433275 | -1.2398932783 | 3.4412126713  |
| C | 1.1643036506  | -.3963833139  | 3.7836857803  |
| C | -.0159194513  | -.9198672939  | 4.3127876568  |
| H | -1.7788378058 | 1.9786150292  | -4.5701310705 |
| H | -2.9181920103 | .9293104998   | -3.6907771302 |
| H | -1.8190607119 | .2444290427   | -4.8934432750 |
| H | .4733055659   | 1.8617700865  | -4.2815442561 |
| H | 2.6159216168  | 2.4129292620  | -4.1477065036 |
| H | 3.6402876270  | 2.0667678022  | -2.7361857905 |
| H | 2.5028065299  | 3.4112983949  | -2.6974459528 |
| H | -4.6009460465 | -2.9908125292 | -2.1979558835 |
| H | -5.9354945620 | -1.7058721539 | -.5638511190  |
| H | -5.0337000463 | .3897745836   | .3818725508   |
| H | -1.1943810550 | -2.0105869287 | -3.3746542207 |
| H | -2.3110683114 | -3.0413216983 | -5.3248174582 |
| H | -3.1217535653 | -1.5069543429 | -4.9600295714 |
| H | -3.8690151395 | -3.0339333234 | -4.4876537426 |
| H | -1.3284641934 | -4.4666440828 | -3.4640958611 |
| H | -2.8765781864 | -4.4612445183 | -2.6119217365 |
| H | -1.4039740766 | -3.9278182130 | -1.7762750757 |
| H | -1.5647441804 | 1.5677552695  | -.1507476481  |
| H | -2.5623303512 | 2.7504181763  | 1.7134013234  |
| H | -2.8779127962 | 1.0273944133  | 1.9638243059  |
| H | -4.1645041929 | 2.0972907889  | 1.3890127365  |
| H | -2.6743645891 | 3.7564718707  | -.6014818412  |
| H | -4.1548457705 | 2.9053288191  | -1.0765179727 |
| H | -2.6803391565 | 2.7242835638  | -2.0365633997 |
| H | 5.7032543012  | .1083690580   | .8370456946   |
| H | 5.5153718436  | 2.1899092160  | 2.1591964462  |

S60

|   |               |               |               |
|---|---------------|---------------|---------------|
| H | 3.5770855306  | 3.6866453846  | 1.8263298797  |
| H | 3.0837741172  | -1.0805443963 | -1.5480761410 |
| H | 4.3619673827  | -3.0078919116 | -.7623187442  |
| H | 3.6077802284  | -2.2152051522 | .6246570631   |
| H | 5.3409414718  | -2.0044504402 | .3115621686   |
| H | 5.1921083197  | -1.6446937359 | -2.7352085829 |
| H | 6.0869604479  | -.5021551908  | -1.7188797478 |
| H | 4.8551809539  | .0900213893   | -2.8421158759 |
| H | .8513535074   | 3.0733875762  | -.6646035996  |
| H | 1.0349135703  | 5.4954002903  | -.3411449400  |
| H | 2.5621388799  | 4.9097643239  | -1.0244576198 |
| H | 2.4547930325  | 5.3101441315  | .6921989501   |
| H | -.2730378292  | 4.0825986060  | 1.2997452400  |
| H | 1.1377352923  | 3.7371217300  | 2.3110889573  |
| H | .1918130993   | 2.4049187861  | 1.6286764197  |
| H | -1.6611097254 | -1.2648414935 | 1.3670784156  |
| H | 2.1600703632  | .1977794814   | 1.9541599319  |
| H | -1.9942042354 | -1.6537837918 | 3.8012657524  |
| H | 2.0036566057  | -.1372291554  | 4.4206116235  |
| H | -.1202819071  | -1.0783398460 | 5.3819735817  |

42. L<sup>1</sup>CuX, X = 4-pyridinecarboxylate

|   |          |          |          |
|---|----------|----------|----------|
| C | -2.81313 | 2.61805  | -0.38545 |
| C | 1.95250  | -0.27370 | 1.80779  |
| C | 1.71855  | -1.36012 | 2.69095  |
| C | 2.81427  | -2.01806 | 3.25824  |
| C | 4.12125  | -1.62839 | 2.97632  |
| C | 4.34318  | -0.56632 | 2.10448  |
| C | 3.28104  | 0.12334  | 1.50869  |
| C | 0.30201  | -1.85582 | 2.97255  |
| C | 0.01869  | -2.04622 | 4.47359  |
| C | 0.01096  | -3.15120 | 2.18863  |
| C | 3.56621  | 1.25663  | 0.52578  |
| C | 4.21545  | 0.72504  | -0.76671 |
| C | 4.42376  | 2.37364  | 1.14821  |
| C | -1.97861 | 0.63446  | -2.19314 |
| C | -3.02091 | -0.32469 | -2.28372 |
| C | -3.64231 | -0.53346 | -3.51967 |
| C | -3.26013 | 0.17582  | -4.65441 |
| C | -2.23287 | 1.11131  | -4.56013 |
| C | -1.58085 | 1.35919  | -3.34770 |
| C | -3.44747 | -1.15426 | -1.07495 |
| C | -3.06473 | -2.63662 | -1.25184 |
| C | -4.95075 | -1.01278 | -0.77091 |
| C | -0.42059 | 2.35053  | -3.29502 |
| C | -0.76415 | 3.70989  | -3.92990 |
| C | 0.84337  | 1.74543  | -3.93772 |
| C | 2.10282  | -2.68577 | -1.30309 |
| C | 0.55132  | -2.24672 | -2.95853 |
| C | 2.63516  | -3.74119 | -2.03036 |
| C | 1.03312  | -3.28950 | -3.73749 |
| C | 2.10056  | -4.06771 | -3.27992 |
| C | 0.64061  | 1.88575  | 3.04753  |
| C | 0.19568  | 1.35236  | 1.69139  |
| C | -0.92930 | 1.98613  | 1.11721  |
| C | -1.60736 | 1.73313  | -0.09606 |
| H | 0.09194  | 2.79010  | 3.31789  |
| H | 1.71178  | 2.10966  | 3.05067  |
| H | 0.47765  | 1.13824  | 3.83235  |
| H | -1.34779 | 2.79076  | 1.71055  |
| H | -2.97823 | 3.34087  | 0.41620  |
| H | -3.72022 | 2.01538  | -0.50222 |
| H | -2.68172 | 3.16413  | -1.32531 |

S61

|    |          |          |          |
|----|----------|----------|----------|
| H  | 2.64171  | -2.85777 | 3.92711  |
| H  | 4.95950  | -2.15515 | 3.42470  |
| H  | 5.36380  | -0.27036 | 1.87393  |
| H  | -0.39149 | -1.09714 | 2.60038  |
| H  | -1.03171 | -2.31807 | 4.63088  |
| H  | 0.21885  | -1.13069 | 5.04093  |
| H  | 0.63001  | -2.84530 | 4.90853  |
| H  | -1.02281 | -3.48074 | 2.34894  |
| H  | 0.67679  | -3.96327 | 2.50322  |
| H  | 0.15488  | -2.99664 | 1.11514  |
| H  | 2.60321  | 1.69337  | 0.24877  |
| H  | 4.37596  | 1.53932  | -1.48355 |
| H  | 3.58000  | -0.02609 | -1.24462 |
| H  | 5.18789  | 0.26148  | -0.56369 |
| H  | 4.55120  | 3.19924  | 0.43798  |
| H  | 5.42429  | 2.01618  | 1.41813  |
| H  | 3.96066  | 2.77785  | 2.05467  |
| H  | -4.43561 | -1.27339 | -3.59618 |
| H  | -3.75109 | -0.00582 | -5.60695 |
| H  | -1.92445 | 1.65422  | -5.45035 |
| H  | -2.89605 | -0.77772 | -0.20925 |
| H  | -3.33549 | -3.21614 | -0.36100 |
| H  | -1.98905 | -2.74839 | -1.41480 |
| H  | -3.58093 | -3.08251 | -2.10996 |
| H  | -5.21163 | -1.56476 | 0.13984  |
| H  | -5.56854 | -1.41118 | -1.58420 |
| H  | -5.23501 | 0.03470  | -0.62323 |
| H  | -0.18931 | 2.52909  | -2.24159 |
| H  | 0.06446  | 4.41437  | -3.79200 |
| H  | -1.65972 | 4.14999  | -3.47761 |
| H  | -0.94406 | 3.62688  | -5.00789 |
| H  | 1.69176  | 2.43570  | -3.85530 |
| H  | 0.68375  | 1.53217  | -5.00121 |
| H  | 1.11909  | 0.80776  | -3.44589 |
| H  | 2.50023  | -2.41284 | -0.32951 |
| H  | -0.27731 | -1.62845 | -3.29230 |
| H  | 3.46515  | -4.33551 | -1.66124 |
| H  | 0.60554  | -3.53083 | -4.70603 |
| C  | 2.66801  | -5.24768 | -4.12507 |
| N  | 1.06850  | -1.93199 | -1.74665 |
| N  | 0.85845  | 0.34093  | 1.13842  |
| N  | -1.26082 | 0.79759  | -0.97492 |
| O  | 2.07260  | -5.43490 | -5.21168 |
| O  | 3.63672  | -5.83885 | -3.59114 |
| Cu | 0.30520  | -0.42899 | -0.64398 |

43.  $L^1CuXO_2$   $\eta^1$  singlet, X = 4-pyridinecarboxylate

|   |          |          |          |
|---|----------|----------|----------|
| O | 4.84702  | -5.06745 | -3.96226 |
| C | 0.39692  | -3.73734 | 3.59486  |
| C | 3.34198  | 0.35325  | 0.04899  |
| C | 4.32127  | -0.14282 | -1.02965 |
| C | 3.72442  | 1.77327  | 0.51634  |
| C | -1.81220 | 0.09589  | -2.29746 |
| C | -2.75303 | -0.90212 | -2.65827 |
| C | -3.20018 | -0.95561 | -3.98277 |
| C | -2.73448 | -0.06300 | -4.94304 |
| C | -1.80474 | 0.90847  | -4.58182 |
| C | -1.32990 | 1.01288  | -3.26993 |
| O | 3.89686  | -4.00293 | -5.74870 |
| C | 1.97039  | -0.92500 | 1.81088  |
| C | -3.27847 | -1.91368 | -1.64099 |
| C | -2.90430 | -3.35821 | -2.02578 |
| C | -4.79953 | -1.77858 | -1.43293 |

|   |          |          |          |
|---|----------|----------|----------|
| C | -0.27937 | 2.07278  | -2.93130 |
| C | -0.71844 | 3.49035  | -3.34622 |
| C | 1.09003  | 1.73588  | -3.55466 |
| C | 2.02329  | -3.32593 | -1.40344 |
| C | 1.16137  | -2.12554 | -3.18305 |
| C | 2.94811  | -3.95528 | -2.22675 |
| C | 2.05176  | -2.72491 | -4.06473 |
| C | 1.90027  | -1.79675 | 2.92971  |
| C | 2.98331  | -3.65372 | -3.59145 |
| C | 0.65106  | 1.34584  | 2.96773  |
| C | 0.15376  | 0.64456  | 1.70586  |
| C | -1.00982 | 1.23092  | 1.14712  |
| C | -1.64411 | 1.01520  | -0.08935 |
| C | 3.09636  | -2.29239 | 3.46373  |
| C | 4.33366  | -1.95990 | 2.92377  |
| C | 4.39222  | -1.11868 | 1.81730  |
| C | 3.23007  | -0.59666 | 1.23943  |
| C | 0.58127  | -2.20709 | 3.58466  |
| C | 0.46623  | -1.65914 | 5.02281  |
| C | -2.82396 | 1.92588  | -0.39930 |
| H | 0.76994  | 2.41663  | 2.77149  |
| H | 1.60112  | 0.94881  | 3.32292  |
| H | -0.08763 | 1.24673  | 3.77046  |
| H | -1.43845 | 2.02730  | 1.74667  |
| H | -3.17195 | 2.43438  | 0.50238  |
| H | -3.65352 | 1.35455  | -0.82481 |
| H | -2.55302 | 2.68799  | -1.13669 |
| H | 3.05317  | -2.95619 | 4.32350  |
| H | 5.24652  | -2.35931 | 3.35823  |
| H | 5.35792  | -0.86249 | 1.39129  |
| H | -0.23235 | -1.78949 | 2.98701  |
| H | -0.51146 | -1.91123 | 5.45070  |
| H | 0.58177  | -0.57246 | 5.06321  |
| H | 1.23205  | -2.09656 | 5.67461  |
| H | -0.57815 | -3.99326 | 4.02742  |
| H | 1.16336  | -4.22873 | 4.20680  |
| H | 0.43725  | -4.15020 | 2.58469  |
| H | 2.35148  | 0.41640  | -0.41052 |
| H | 4.27532  | 0.51174  | -1.90721 |
| H | 4.08189  | -1.15871 | -1.35480 |
| H | 5.35967  | -0.13846 | -0.67826 |
| H | 3.76544  | 2.46424  | -0.33422 |
| H | 4.71019  | 1.77470  | 0.99769  |
| H | 3.00198  | 2.16801  | 1.23810  |
| H | -3.91988 | -1.71917 | -4.26750 |
| H | -3.08629 | -0.12886 | -5.96925 |
| H | -1.43122 | 1.59441  | -5.33814 |
| H | -2.79564 | -1.70114 | -0.68405 |
| H | -3.26027 | -4.05996 | -1.26284 |
| H | -1.82085 | -3.47948 | -2.10359 |
| H | -3.35214 | -3.64879 | -2.98376 |
| H | -5.14201 | -2.47295 | -0.65662 |
| H | -5.35502 | -2.00797 | -2.35007 |
| H | -5.07583 | -0.76460 | -1.12303 |
| H | -0.14289 | 2.07612  | -1.84731 |
| H | 0.01012  | 4.23178  | -2.99802 |
| H | -1.69470 | 3.75385  | -2.92560 |
| H | -0.79095 | 3.59095  | -4.43499 |
| H | 1.83311  | 2.49581  | -3.28381 |
| H | 1.03159  | 1.70076  | -4.64863 |
| H | 1.45964  | 0.76626  | -3.21046 |
| H | 1.96575  | -3.55428 | -0.34233 |
| H | 0.42657  | -1.40153 | -3.52309 |
| H | 3.66447  | -4.67432 | -1.84265 |

|     |                                                         |          |          |
|-----|---------------------------------------------------------|----------|----------|
| H   | 2.05293                                                 | -2.49622 | -5.12551 |
| N   | 1.14523                                                 | -2.40755 | -1.86077 |
| N   | 0.78963                                                 | -0.39992 | 1.19789  |
| N   | -1.26499                                                | 0.10375  | -0.98399 |
| C   | 4.02720                                                 | -4.31923 | -4.54322 |
| O   | -0.21074                                                | -4.11131 | 0.36208  |
| O   | -0.62609                                                | -2.92136 | 0.55889  |
| Cu  | 0.04093                                                 | -1.35497 | -0.48120 |
| 44. | $L^1CuXO_2$ $\eta^1$ triplet, X = 4-pyridinecarboxylate |          |          |
| O   | 4.36520                                                 | -5.61011 | -4.18061 |
| C   | 0.63065                                                 | -3.89731 | 3.29031  |
| C   | 3.45040                                                 | 0.77348  | 0.39396  |
| C   | 4.40990                                                 | 0.34706  | -0.73282 |
| C   | 3.87074                                                 | 2.13502  | 0.98230  |
| C   | -1.75507                                                | 0.10239  | -2.28539 |
| C   | -2.74534                                                | -0.86207 | -2.61003 |
| C   | -3.25059                                                | -0.90001 | -3.91494 |
| C   | -2.79340                                                | -0.02970 | -4.89889 |
| C   | -1.80809                                                | 0.90019  | -4.58007 |
| C   | -1.27929                                                | 0.98928  | -3.28827 |
| O   | 2.93282                                                 | -4.96152 | -5.83724 |
| C   | 2.05501                                                 | -0.76467 | 1.90953  |
| C   | -3.26564                                                | -1.86253 | -1.58154 |
| C   | -3.02498                                                | -3.31656 | -2.03271 |
| C   | -4.75848                                                | -1.64380 | -1.26504 |
| C   | -0.17275                                                | 2.00174  | -2.99345 |
| C   | -0.53860                                                | 3.42960  | -3.43748 |
| C   | 1.16517                                                 | 1.56309  | -3.62170 |
| C   | 2.42975                                                 | -3.05758 | -1.48168 |
| C   | 0.99919                                                 | -2.37081 | -3.16558 |
| C   | 3.08933                                                 | -3.92233 | -2.34342 |
| C   | 1.61455                                                 | -3.21526 | -4.08032 |
| C   | 1.97465                                                 | -1.76698 | 2.91171  |
| C   | 2.68705                                                 | -4.01667 | -3.67919 |
| C   | 0.53058                                                 | 1.34697  | 3.09892  |
| C   | 0.13817                                                 | 0.67988  | 1.78208  |
| C   | -1.03622                                                | 1.20725  | 1.19451  |
| C   | -1.62440                                                | 0.98972  | -0.07019 |
| C   | 3.15916                                                 | -2.22862 | 3.49725  |
| C   | 4.40370                                                 | -1.74361 | 3.10776  |
| C   | 4.47636                                                 | -0.78424 | 2.10224  |
| C   | 3.32404                                                 | -0.28516 | 1.48694  |
| C   | 0.63927                                                 | -2.35720 | 3.36333  |
| C   | 0.25616                                                 | -1.89740 | 4.78489  |
| C   | -2.84300                                                | 1.85116  | -0.38033 |
| H   | 0.80616                                                 | 2.39201  | 2.91564  |
| H   | 1.36994                                                 | 0.85360  | 3.58799  |
| H   | -0.32085                                                | 1.35787  | 3.78756  |
| H   | -1.53023                                                | 1.96221  | 1.79721  |
| H   | -3.21373                                                | 2.34740  | 0.51878  |
| H   | -3.65026                                                | 1.25381  | -0.81095 |
| H   | -2.59806                                                | 2.62122  | -1.12003 |
| H   | 3.10378                                                 | -2.99028 | 4.27106  |
| H   | 5.31025                                                 | -2.12115 | 3.57359  |
| H   | 5.44863                                                 | -0.41580 | 1.78456  |
| H   | -0.12850                                                | -1.99189 | 2.67657  |
| H   | -0.71833                                                | -2.30950 | 5.07368  |
| H   | 0.19542                                                 | -0.80786 | 4.85850  |
| H   | 0.99317                                                 | -2.24060 | 5.52071  |
| H   | -0.37060                                                | -4.28259 | 3.51694  |
| H   | 1.32292                                                 | -4.34072 | 4.01543  |
| H   | 0.91111                                                 | -4.25605 | 2.29730  |
| H   | 2.45939                                                 | 0.89921  | -0.05102 |
| H   | 4.40975                                                 | 1.09577  | -1.53342 |

S64

|    |          |          |          |
|----|----------|----------|----------|
| H  | 4.11147  | -0.61019 | -1.16911 |
| H  | 5.44268  | 0.24768  | -0.37852 |
| H  | 3.90983  | 2.90150  | 0.19898  |
| H  | 4.86465  | 2.07638  | 1.44267  |
| H  | 3.16822  | 2.47214  | 1.75149  |
| H  | -4.01368 | -1.63299 | -4.16578 |
| H  | -3.19318 | -0.08241 | -5.90827 |
| H  | -1.43737 | 1.56867  | -5.35320 |
| H  | -2.70274 | -1.70470 | -0.65900 |
| H  | -3.32158 | -4.01789 | -1.24437 |
| H  | -1.97067 | -3.49428 | -2.26105 |
| H  | -3.60689 | -3.56208 | -2.92880 |
| H  | -5.09895 | -2.35791 | -0.50555 |
| H  | -5.38062 | -1.78620 | -2.15673 |
| H  | -4.95012 | -0.63533 | -0.88456 |
| H  | -0.02681 | 2.02349  | -1.91050 |
| H  | 0.23562  | 4.13755  | -3.11951 |
| H  | -1.49098 | 3.75534  | -3.00524 |
| H  | -0.62541 | 3.51074  | -4.52694 |
| H  | 1.96183  | 2.27519  | -3.37426 |
| H  | 1.09148  | 1.50831  | -4.71406 |
| H  | 1.46848  | 0.57725  | -3.25863 |
| H  | 2.72302  | -2.96210 | -0.43950 |
| H  | 0.16007  | -1.74238 | -3.44939 |
| H  | 3.92295  | -4.53768 | -2.01984 |
| H  | 1.28989  | -3.28201 | -5.11400 |
| N  | 1.39246  | -2.27980 | -1.87271 |
| N  | 0.87843  | -0.28890 | 1.25860  |
| N  | -1.16982 | 0.13853  | -0.98690 |
| C  | 3.40827  | -4.97452 | -4.67900 |
| O  | -0.44095 | -4.03373 | 0.05333  |
| O  | -0.71466 | -2.87265 | 0.36810  |
| Cu | 0.43079  | -1.07799 | -0.56291 |

45.  $L^1CuXO_2$   $\eta^2$  singlet, X = 4-pyridinecarboxylate

|   |          |          |          |
|---|----------|----------|----------|
| O | -2.44471 | -1.99651 | 4.67757  |
| C | -3.06785 | -2.72816 | -5.53904 |
| C | -2.33252 | -4.29246 | -3.69372 |
| C | -2.71604 | 1.22156  | -0.92423 |
| C | -3.10832 | 1.33820  | 0.55954  |
| C | -3.15828 | 2.50097  | -1.66729 |
| C | 2.65535  | 0.83338  | -1.51194 |
| C | 3.87119  | 0.11326  | -1.40952 |
| C | 4.84613  | 0.56920  | -0.51504 |
| C | 4.64539  | 1.70625  | 0.25971  |
| C | 3.44786  | 2.40689  | 0.15092  |
| O | -0.54616 | -0.84871 | 5.23221  |
| C | 2.49533  | 1.93138  | -4.11559 |
| C | 2.43452  | 1.99152  | -0.71918 |
| C | 4.15634  | -1.12138 | -2.25939 |
| C | 4.47478  | -2.35363 | -1.39156 |
| C | 5.29366  | -0.86389 | -3.26847 |
| C | 1.14121  | 2.80506  | -0.79426 |
| C | 1.37015  | 4.17655  | -1.46482 |
| C | 0.49253  | 3.00303  | 0.59007  |
| C | -1.25776 | -2.00259 | 0.64612  |
| C | 0.59399  | -0.76425 | 1.20217  |
| C | -1.66550 | -2.06535 | 1.97515  |
| C | -2.54759 | -0.80253 | -2.53628 |
| C | 0.26224  | -0.79039 | 2.55198  |
| C | -0.90755 | -1.43347 | 2.96574  |
| C | -2.17383 | 0.82741  | -4.84366 |
| C | -1.02516 | 0.40584  | -3.93019 |



|    |          |          |          |
|----|----------|----------|----------|
| C  | 0.22058  | 0.97144  | -4.29172 |
| C  | -3.13382 | -1.95252 | -3.12466 |
| C  | -4.45255 | -2.28559 | -2.78472 |
| C  | -5.18485 | -1.52522 | -1.88233 |
| C  | -4.59495 | -0.41363 | -1.29153 |
| C  | -3.28219 | -0.03248 | -1.59036 |
| C  | -2.40624 | -2.82249 | -4.14717 |
| C  | 1.40101  | 1.04263  | -3.54407 |
| H  | -2.20285 | 1.91764  | -4.93338 |
| H  | -3.14513 | 0.48000  | -4.49668 |
| H  | -1.99986 | 0.42942  | -5.84949 |
| H  | 0.21448  | 1.53828  | -5.21578 |
| H  | 2.10872  | 2.56465  | -4.91645 |
| H  | 3.29445  | 1.30515  | -4.52765 |
| H  | 2.94876  | 2.56520  | -3.35159 |
| H  | -4.91272 | -3.15663 | -3.24311 |
| H  | -6.20747 | -1.79841 | -1.63467 |
| H  | -5.16511 | 0.17181  | -0.57700 |
| H  | -1.37798 | -2.46202 | -4.22443 |
| H  | -2.50916 | -3.32023 | -6.27343 |
| H  | -3.11489 | -1.69786 | -5.90271 |
| H  | -4.09422 | -3.11418 | -5.51529 |
| H  | -1.75255 | -4.88056 | -4.41409 |
| H  | -3.32878 | -4.74510 | -3.62399 |
| H  | -1.84687 | -4.37641 | -2.71904 |
| H  | -1.62611 | 1.15512  | -0.97939 |
| H  | -2.57670 | 2.17650  | 1.02028  |
| H  | -2.85859 | 0.43492  | 1.11797  |
| H  | -4.18021 | 1.53282  | 0.68578  |
| H  | -2.75054 | 3.39155  | -1.17439 |
| H  | -4.25156 | 2.59127  | -1.66503 |
| H  | -2.82554 | 2.51413  | -2.70749 |
| H  | 5.78115  | 0.02197  | -0.42929 |
| H  | 5.41493  | 2.04327  | 0.94898  |
| H  | 3.29144  | 3.29207  | 0.76131  |
| H  | 3.25280  | -1.35174 | -2.82783 |
| H  | 4.60895  | -3.23611 | -2.02743 |
| H  | 3.65701  | -2.56504 | -0.69943 |
| H  | 5.39565  | -2.21478 | -0.81307 |
| H  | 5.43507  | -1.73845 | -3.91428 |
| H  | 6.24526  | -0.66823 | -2.76016 |
| H  | 5.08086  | -0.00234 | -3.90992 |
| H  | 0.43280  | 2.25075  | -1.41500 |
| H  | 0.42539  | 4.72887  | -1.53184 |
| H  | 1.77297  | 4.08065  | -2.47812 |
| H  | 2.07051  | 4.78812  | -0.88389 |
| H  | -0.44558 | 3.56042  | 0.48746  |
| H  | 1.13721  | 3.57812  | 1.26391  |
| H  | 0.26975  | 2.04887  | 1.07335  |
| H  | -1.83041 | -2.48870 | -0.13957 |
| H  | 1.49456  | -0.25925 | 0.86090  |
| H  | -2.57239 | -2.58209 | 2.27485  |
| H  | 0.87770  | -0.31310 | 3.30832  |
| N  | -1.21063 | -0.40361 | -2.89764 |
| N  | 1.62351  | 0.39167  | -2.39625 |
| N  | -0.15582 | -1.34110 | 0.23969  |
| C  | -1.34747 | -1.42964 | 4.46178  |
| O  | 1.52289  | -2.81396 | -2.04862 |
| O  | 0.22030  | -3.05527 | -2.19068 |
| Cu | 0.49189  | -1.17682 | -1.99882 |

46. L<sup>1</sup>CuX, X = 4-methoxypyridine

|   |         |          |          |
|---|---------|----------|----------|
| C | 3.22057 | -5.30381 | -3.85928 |
|---|---------|----------|----------|

|   |          |          |          |
|---|----------|----------|----------|
| C | -2.60188 | 3.34938  | -0.24123 |
| C | -0.02768 | -2.66891 | 2.19222  |
| C | 3.64305  | 1.69023  | 0.60750  |
| C | 4.11730  | 1.19791  | -0.77530 |
| C | 4.65457  | 2.68285  | 1.20715  |
| C | -1.93219 | 1.26917  | -2.04592 |
| C | -3.04428 | 0.38739  | -2.08674 |
| C | -3.67139 | 0.14509  | -3.31425 |
| C | -3.22968 | 0.75014  | -4.48783 |
| C | -2.13949 | 1.61529  | -4.44002 |
| C | -1.47717 | 1.89225  | -3.23842 |
| C | 2.01727  | 0.15376  | 1.87560  |
| C | -3.53302 | -0.33187 | -0.83157 |
| C | -3.19724 | -1.83603 | -0.88802 |
| C | -5.03508 | -0.11870 | -0.57259 |
| C | -0.25699 | 2.81149  | -3.24036 |
| C | -0.53546 | 4.16668  | -3.91530 |
| C | 0.95783  | 2.11821  | -3.88980 |
| C | 1.95196  | -2.16892 | -1.31125 |
| C | 0.30624  | -1.64302 | -2.83782 |
| C | 2.41830  | -3.21965 | -2.09499 |
| C | 0.69901  | -2.66385 | -3.68427 |
| C | 1.77641  | -0.97571 | 2.70093  |
| C | 1.78138  | -3.47610 | -3.31584 |
| C | 0.84926  | 2.39779  | 3.16040  |
| C | 0.33321  | 1.88593  | 1.82427  |
| C | -0.75362 | 2.58587  | 1.25255  |
| C | -1.46074 | 2.38466  | 0.04299  |
| C | 2.86717  | -1.71908 | 3.16443  |
| C | 4.17540  | -1.37309 | 2.83528  |
| C | 4.40479  | -0.26403 | 2.02595  |
| C | 3.34921  | 0.51319  | 1.53613  |
| C | 0.35496  | -1.42680 | 3.02542  |
| C | 0.13797  | -1.68774 | 4.52589  |
| H | 3.30657  | -6.00435 | -4.69050 |
| H | 4.15214  | -4.73393 | -3.76478 |
| H | 3.03528  | -5.86048 | -2.93330 |
| H | 0.29480  | 3.27618  | 3.49503  |
| H | 1.90996  | 2.66342  | 3.08928  |
| H | 0.77436  | 1.62318  | 3.93166  |
| H | -1.11033 | 3.41989  | 1.84499  |
| H | -2.66903 | 4.12821  | 0.52047  |
| H | -3.55849 | 2.81593  | -0.27506 |
| H | -2.47629 | 3.82540  | -1.21892 |
| H | 2.68907  | -2.58980 | 3.79060  |
| H | 5.00892  | -1.96443 | 3.20521  |
| H | 5.42618  | 0.00197  | 1.76484  |
| H | -0.32172 | -0.62161 | 2.72750  |
| H | -0.91413 | -1.92303 | 4.72213  |
| H | 0.40718  | -0.81392 | 5.12820  |
| H | 0.73285  | -2.53471 | 4.88616  |
| H | -1.06016 | -2.97469 | 2.39735  |
| H | 0.62639  | -3.51807 | 2.42506  |
| H | 0.05512  | -2.46339 | 1.12003  |
| H | 2.70379  | 2.22693  | 0.45097  |
| H | 4.29217  | 2.04267  | -1.45188 |
| H | 3.36762  | 0.54771  | -1.23728 |
| H | 5.05331  | 0.63200  | -0.69660 |
| H | 4.77471  | 3.54988  | 0.54766  |
| H | 5.64474  | 2.23136  | 1.33581  |
| H | 4.32641  | 3.04606  | 2.18647  |
| H | -4.51955 | -0.53438 | -3.35269 |
| H | -3.73047 | 0.54882  | -5.43116 |
| H | -1.79173 | 2.08264  | -5.35770 |

|    |          |          |          |
|----|----------|----------|----------|
| H  | -2.98883 | 0.08785  | 0.01889  |
| H  | -3.52324 | -2.34255 | 0.02795  |
| H  | -2.11924 | -1.99372 | -0.99378 |
| H  | -3.69454 | -2.32293 | -1.73543 |
| H  | -5.32683 | -0.57840 | 0.37826  |
| H  | -5.65429 | -0.56950 | -1.35638 |
| H  | -5.28654 | 0.94581  | -0.52427 |
| H  | 0.00680  | 3.01095  | -2.19854 |
| H  | 0.33517  | 4.82554  | -3.82126 |
| H  | -1.39220 | 4.67265  | -3.45834 |
| H  | -0.74704 | 4.05716  | -4.98486 |
| H  | 1.83876  | 2.77014  | -3.86266 |
| H  | 0.75777  | 1.86718  | -4.93823 |
| H  | 1.20883  | 1.19247  | -3.36303 |
| H  | 2.42852  | -1.94293 | -0.36238 |
| H  | -0.52656 | -0.99946 | -3.09984 |
| H  | 3.25939  | -3.80710 | -1.74859 |
| H  | 0.18702  | -2.84262 | -4.62301 |
| N  | 0.91715  | -1.37934 | -1.65705 |
| N  | 0.92523  | 0.83112  | 1.26926  |
| N  | -1.19651 | 1.42176  | -0.83702 |
| O  | 2.12187  | -4.45306 | -4.18208 |
| Cu | 0.28057  | 0.14513  | -0.45534 |

47.  $L^1CuXO_2$   $\eta^1$  singlet, X = 4-methoxypyridine

|   |          |          |          |
|---|----------|----------|----------|
| C | 3.52261  | -4.79555 | -4.29233 |
| H | 3.85811  | -5.22867 | -5.23478 |
| H | 3.06917  | -5.57815 | -3.67345 |
| H | 4.37995  | -4.36222 | -3.76431 |
| C | -2.58032 | 3.27488  | -0.18779 |
| C | 0.29147  | -2.65121 | 3.84539  |
| C | 3.34091  | 1.07570  | -0.02883 |
| C | 4.18346  | 0.47393  | -1.16820 |
| C | 3.89641  | 2.45667  | 0.37673  |
| C | -1.90664 | 1.22773  | -2.03582 |
| C | -2.96971 | 0.32425  | -2.29353 |
| C | -3.47458 | 0.23841  | -3.59605 |
| C | -2.95226 | 1.00908  | -4.63027 |
| C | -1.90685 | 1.89141  | -4.36824 |
| C | -1.36843 | 2.02366  | -3.08340 |
| C | 1.98918  | -0.03519 | 1.85673  |
| C | -3.57479 | -0.54399 | -1.19158 |
| C | -3.39312 | -2.04708 | -1.48064 |
| C | -5.06034 | -0.20883 | -0.95486 |
| C | -0.19440 | 2.97717  | -2.85423 |
| C | -0.47485 | 4.39589  | -3.38486 |
| C | 1.10990  | 2.42482  | -3.46439 |
| C | 1.57084  | -2.42256 | -1.38994 |
| C | 0.45597  | -1.32251 | -3.07837 |
| C | 2.24149  | -3.24370 | -2.28920 |
| C | 1.06881  | -2.09540 | -4.05002 |
| C | 1.91256  | -0.88574 | 2.99162  |
| C | 1.98983  | -3.07779 | -3.65695 |
| C | 0.98807  | 2.40048  | 3.02785  |
| C | 0.34138  | 1.73274  | 1.82023  |
| C | -0.77834 | 2.42811  | 1.30114  |
| C | -1.50786 | 2.24053  | 0.11226  |
| C | 3.08948  | -1.49901 | 3.43999  |
| C | 4.30926  | -1.30186 | 2.80224  |
| C | 4.37091  | -0.48072 | 1.68054  |
| C | 3.22755  | 0.15421  | 1.18379  |
| C | 0.61466  | -1.14624 | 3.75518  |
| C | 0.66181  | -0.53917 | 5.17333  |

S68

|    |          |          |          |
|----|----------|----------|----------|
| H  | 1.19128  | 3.45259  | 2.80433  |
| H  | 1.91895  | 1.91930  | 3.32528  |
| H  | 0.30048  | 2.38009  | 3.87987  |
| H  | -1.07169 | 3.29501  | 1.88293  |
| H  | -2.82613 | 3.85208  | 0.70543  |
| H  | -3.48956 | 2.79499  | -0.55946 |
| H  | -2.24846 | 3.97349  | -0.96223 |
| H  | 3.04509  | -2.14537 | 4.31219  |
| H  | 5.20723  | -1.78603 | 3.17712  |
| H  | 5.32474  | -0.32511 | 1.18456  |
| H  | -0.19958 | -0.67401 | 3.20072  |
| H  | -0.29798 | -0.68621 | 5.68171  |
| H  | 0.87578  | 0.53288  | 5.16081  |
| H  | 1.43411  | -1.02249 | 5.78289  |
| H  | -0.68250 | -2.79380 | 4.32792  |
| H  | 1.03371  | -3.18467 | 4.45138  |
| H  | 0.25134  | -3.11193 | 2.85641  |
| H  | 2.32925  | 1.23012  | -0.41567 |
| H  | 4.13360  | 1.11845  | -2.05295 |
| H  | 3.82319  | -0.51940 | -1.45324 |
| H  | 5.24090  | 0.38142  | -0.89594 |
| H  | 3.93760  | 3.12917  | -0.48817 |
| H  | 4.91148  | 2.36637  | 0.78132  |
| H  | 3.27504  | 2.93005  | 1.14284  |
| H  | -4.29177 | -0.44792 | -3.80229 |
| H  | -3.35704 | 0.92398  | -5.63509 |
| H  | -1.49826 | 2.48792  | -5.17977 |
| H  | -3.03695 | -0.32529 | -0.26541 |
| H  | -3.81649 | -2.64493 | -0.66596 |
| H  | -2.33556 | -2.31110 | -1.56743 |
| H  | -3.89867 | -2.34242 | -2.40773 |
| H  | -5.45455 | -0.79520 | -0.11728 |
| H  | -5.67177 | -0.43774 | -1.83531 |
| H  | -5.20144 | 0.85156  | -0.71990 |
| H  | -0.02952 | 3.05672  | -1.77708 |
| H  | 0.33981  | 5.07330  | -3.10565 |
| H  | -1.40644 | 4.80354  | -2.97933 |
| H  | -0.55492 | 4.41564  | -4.47724 |
| H  | 1.94328  | 3.11244  | -3.27867 |
| H  | 1.01831  | 2.29705  | -4.54939 |
| H  | 1.37310  | 1.45487  | -3.03260 |
| H  | 1.73312  | -2.54384 | -0.32393 |
| H  | -0.26064 | -0.55599 | -3.35269 |
| H  | 2.93597  | -3.98422 | -1.91372 |
| H  | 0.84989  | -1.95253 | -5.10191 |
| N  | 0.69856  | -1.47046 | -1.75850 |
| N  | 0.82814  | 0.60532  | 1.31835  |
| N  | -1.29874 | 1.24349  | -0.74802 |
| O  | 2.56917  | -3.79359 | -4.64466 |
| O  | -0.34025 | -3.03205 | 0.63650  |
| O  | -0.74134 | -1.83612 | 0.85328  |
| Cu | -0.14172 | -0.28918 | -0.20368 |

48.  $L^1CuXO_2$   $\eta^1$  triplet, X = 4-methoxypyridine

|   |          |          |          |
|---|----------|----------|----------|
| C | 3.30962  | -5.35496 | -3.86591 |
| H | 3.49507  | -5.97770 | -4.74146 |
| H | 2.98945  | -5.98622 | -3.02881 |
| H | 4.23084  | -4.82657 | -3.59527 |
| C | -2.60116 | 3.24454  | -0.20193 |
| C | 0.61666  | -3.00840 | 3.25460  |
| C | 3.39016  | 1.63571  | 0.25973  |
| C | 4.09475  | 1.14512  | -1.02021 |
| C | 4.06589  | 2.91072  | 0.79974  |

|   |          |          |          |
|---|----------|----------|----------|
| C | -1.90323 | 1.24907  | -2.07151 |
| C | -3.03695 | 0.42951  | -2.31638 |
| C | -3.58307 | 0.39772  | -3.60506 |
| C | -3.03364 | 1.13602  | -4.64836 |
| C | -1.91246 | 1.92431  | -4.40648 |
| C | -1.33334 | 2.00151  | -3.13483 |
| C | 2.07695  | 0.09788  | 1.85176  |
| C | -3.67534 | -0.41474 | -1.21610 |
| C | -3.73031 | -1.90688 | -1.59790 |
| C | -5.08483 | 0.09063  | -0.84851 |
| C | -0.08364 | 2.85800  | -2.93421 |
| C | -0.28718 | 4.31338  | -3.39525 |
| C | 1.13672  | 2.23292  | -3.63968 |
| C | 1.84445  | -2.37239 | -1.24978 |
| C | 0.40735  | -1.66921 | -2.91045 |
| C | 2.37195  | -3.37586 | -2.05535 |
| C | 0.86726  | -2.63772 | -3.78453 |
| C | 2.04543  | -0.94852 | 2.81159  |
| C | 1.87362  | -3.51680 | -3.35717 |
| C | 0.83886  | 2.35754  | 3.13308  |
| C | 0.28142  | 1.71445  | 1.86795  |
| C | -0.85358 | 2.36576  | 1.32971  |
| C | -1.53527 | 2.20252  | 0.10366  |
| C | 3.25777  | -1.49680 | 3.24687  |
| C | 4.47954  | -1.05113 | 2.75114  |
| C | 4.49948  | -0.04272 | 1.79229  |
| C | 3.31806  | 0.54159  | 1.32315  |
| C | 0.73315  | -1.47757 | 3.38540  |
| C | 0.54375  | -1.05710 | 4.85701  |
| H | 1.21457  | 3.36274  | 2.91160  |
| H | 1.64991  | 1.77883  | 3.57457  |
| H | 0.04343  | 2.47119  | 3.87685  |
| H | -1.21227 | 3.19258  | 1.93343  |
| H | -2.87363 | 3.80522  | 0.69405  |
| H | -3.50016 | 2.78456  | -0.61844 |
| H | -2.23660 | 3.95735  | -0.94981 |
| H | 3.24265  | -2.28799 | 3.99219  |
| H | 5.40840  | -1.48800 | 3.10812  |
| H | 5.45337  | 0.30143  | 1.40004  |
| H | -0.07999 | -1.03394 | 2.80534  |
| H | -0.41940 | -1.41511 | 5.23883  |
| H | 0.56842  | 0.03011  | 4.97331  |
| H | 1.33163  | -1.47830 | 5.49230  |
| H | -0.37478 | -3.34287 | 3.57989  |
| H | 1.35601  | -3.52765 | 3.87513  |
| H | 0.75616  | -3.33755 | 2.22105  |
| H | 2.36426  | 1.89478  | -0.01436 |
| H | 4.08380  | 1.92639  | -1.78881 |
| H | 3.59571  | 0.26245  | -1.43301 |
| H | 5.14188  | 0.88117  | -0.83255 |
| H | 4.05685  | 3.70397  | 0.04326  |
| H | 5.11092  | 2.72428  | 1.07309  |
| H | 3.55259  | 3.28663  | 1.69028  |
| H | -4.45723 | -0.22036 | -3.79372 |
| H | -3.47315 | 1.09539  | -5.64146 |
| H | -1.47546 | 2.49262  | -5.22391 |
| H | -3.04715 | -0.32297 | -0.32650 |
| H | -4.10583 | -2.50356 | -0.75902 |
| H | -2.74087 | -2.28996 | -1.86446 |
| H | -4.39721 | -2.08250 | -2.44974 |
| H | -5.50825 | -0.50900 | -0.03444 |
| H | -5.76797 | 0.02135  | -1.70298 |
| H | -5.06840 | 1.13466  | -0.52076 |
| H | 0.13772  | 2.87780  | -1.86411 |

S70

|    |          |          |          |
|----|----------|----------|----------|
| H  | 0.59575  | 4.91750  | -3.15764 |
| H  | -1.15144 | 4.77279  | -2.90487 |
| H  | -0.44810 | 4.38072  | -4.47713 |
| H  | 2.03567  | 2.83588  | -3.46629 |
| H  | 0.98067  | 2.16959  | -4.72307 |
| H  | 1.33357  | 1.22233  | -3.26881 |
| H  | 2.20956  | -2.23749 | -0.23647 |
| H  | -0.37066 | -0.97474 | -3.21164 |
| H  | 3.14613  | -4.02204 | -1.66108 |
| H  | 0.46299  | -2.72776 | -4.78633 |
| N  | 0.88029  | -1.52463 | -1.65190 |
| N  | 0.86691  | 0.64737  | 1.33413  |
| N  | -1.27553 | 1.24921  | -0.79033 |
| O  | 2.28290  | -4.44226 | -4.25037 |
| O  | -1.06113 | -2.97936 | 0.31861  |
| O  | -1.16750 | -1.78768 | 0.62991  |
| Cu | 0.09995  | -0.15317 | -0.32453 |

49.  $L^1CuXO_2$   $\eta^2$  singlet, X = 4-methoxypyridine

|   |          |          |          |
|---|----------|----------|----------|
| C | -0.05436 | -1.08162 | 6.45386  |
| H | -0.50035 | -1.39044 | 7.40003  |
| H | 0.05069  | 0.01007  | 6.44242  |
| H | 0.93521  | -1.54253 | 6.35020  |
| C | 1.57544  | 0.86861  | -2.71514 |
| C | -2.56984 | -3.20848 | -4.59544 |
| C | -2.02241 | -4.49497 | -2.49248 |
| C | -2.78044 | 1.30345  | -0.53630 |
| C | -3.25711 | 1.59594  | 0.89851  |
| C | -3.15668 | 2.47784  | -1.46285 |
| C | 2.66539  | 0.72997  | -0.56504 |
| C | 3.79856  | -0.08109 | -0.30263 |
| C | 4.73768  | 0.36759  | 0.63400  |
| C | 4.57832  | 1.57334  | 1.30829  |
| C | 3.45581  | 2.35559  | 1.05528  |
| C | 2.76576  | 1.62499  | -3.28431 |
| C | 2.48134  | 1.95712  | 0.13238  |
| C | 4.04909  | -1.40499 | -1.01995 |
| C | 4.27823  | -2.56260 | -0.02908 |
| C | 5.23483  | -1.29413 | -1.99955 |
| C | 1.27654  | 2.87108  | -0.10447 |
| C | 1.69271  | 4.19096  | -0.78634 |
| C | 0.50494  | 3.17400  | 1.19425  |
| C | -1.28808 | -1.44835 | 1.84394  |
| C | 0.66520  | -0.36654 | 2.34588  |
| C | -1.54599 | -1.71520 | 3.17992  |
| C | -2.47411 | -0.86973 | -1.87948 |
| C | 0.50414  | -0.57955 | 3.71491  |
| C | -0.63797 | -1.26202 | 4.14690  |
| C | -1.87806 | 0.50244  | -4.34369 |
| C | -0.82997 | 0.24521  | -3.27182 |
| C | 0.45045  | 0.77269  | -3.55097 |
| C | -2.94549 | -2.12959 | -2.32784 |
| C | -4.26339 | -2.49112 | -2.01834 |
| C | -5.09148 | -1.65807 | -1.27409 |
| C | -4.60312 | -0.44276 | -0.80282 |
| C | -3.29411 | -0.03043 | -1.07892 |
| C | -2.08213 | -3.09621 | -3.13670 |
| H | -1.83243 | 1.54307  | -4.67594 |
| H | -2.88856 | 0.28052  | -4.00331 |
| H | -1.66414 | -0.12530 | -5.21580 |
| H | 0.54696  | 1.25294  | -4.51765 |
| H | 2.44654  | 2.35931  | -4.02651 |
| H | 3.43482  | 0.91237  | -3.78244 |

S71

|    |          |          |          |
|----|----------|----------|----------|
| H  | 3.34765  | 2.12690  | -2.51153 |
| H  | -4.64404 | -3.44694 | -2.36652 |
| H  | -6.11105 | -1.96012 | -1.04990 |
| H  | -5.24746 | 0.19352  | -0.20434 |
| H  | -1.06210 | -2.70477 | -3.14488 |
| H  | -1.90682 | -3.86518 | -5.16998 |
| H  | -2.59792 | -2.23589 | -5.09500 |
| H  | -3.57932 | -3.63334 | -4.64246 |
| H  | -1.32813 | -5.13321 | -3.05016 |
| H  | -3.00036 | -4.98975 | -2.50174 |
| H  | -1.67122 | -4.43863 | -1.46054 |
| H  | -1.68870 | 1.23753  | -0.50746 |
| H  | -2.73672 | 2.47625  | 1.29064  |
| H  | -3.05374 | 0.75779  | 1.57082  |
| H  | -4.33054 | 1.81204  | 0.94104  |
| H  | -2.76859 | 3.42273  | -1.06484 |
| H  | -4.24556 | 2.57197  | -1.54822 |
| H  | -2.75300 | 2.34930  | -2.47047 |
| H  | 5.61444  | -0.24175 | 0.83420  |
| H  | 5.32356  | 1.90147  | 2.02794  |
| H  | 3.33188  | 3.29630  | 1.58506  |
| H  | 3.15499  | -1.64876 | -1.59741 |
| H  | 4.36481  | -3.50967 | -0.57236 |
| H  | 3.44310  | -2.65289 | 0.66912  |
| H  | 5.20059  | -2.42899 | 0.54838  |
| H  | 5.37154  | -2.23693 | -2.54113 |
| H  | 6.17002  | -1.07613 | -1.47034 |
| H  | 5.07956  | -0.49970 | -2.73664 |
| H  | 0.58785  | 2.35331  | -0.77630 |
| H  | 0.81191  | 4.80959  | -0.99219 |
| H  | 2.20845  | 4.01699  | -1.73474 |
| H  | 2.36468  | 4.77224  | -0.14473 |
| H  | -0.36382 | 3.80577  | 0.97704  |
| H  | 1.12465  | 3.71233  | 1.92028  |
| H  | 0.14616  | 2.25853  | 1.67111  |
| H  | -1.97225 | -1.79262 | 1.07532  |
| H  | 1.54188  | 0.16351  | 1.98759  |
| H  | -2.43576 | -2.25314 | 3.48797  |
| H  | 1.25339  | -0.21002 | 4.40383  |
| N  | -1.13684 | -0.44039 | -2.17665 |
| N  | 1.66673  | 0.31286  | -1.50468 |
| N  | -0.20609 | -0.76987 | 1.41193  |
| O  | -0.94646 | -1.52948 | 5.43812  |
| O  | 1.23522  | -2.61499 | -0.39867 |
| O  | -0.05583 | -2.84721 | -0.66327 |
| Cu | 0.33747  | -1.03844 | -1.04005 |

50.  $L^1CuXO_2$   $\eta^2$  triplet, X = 4-methoxypyridine

|   |          |          |          |
|---|----------|----------|----------|
| C | 0.57565  | -0.89766 | 6.44693  |
| H | 0.17769  | -1.10907 | 7.43968  |
| H | 0.81292  | 0.16982  | 6.36897  |
| H | 1.48570  | -1.48717 | 6.28658  |
| C | 1.55730  | 0.87640  | -2.65169 |
| C | -2.40771 | -3.12804 | -4.75998 |
| C | -1.99562 | -4.53312 | -2.70790 |
| C | -3.01796 | 1.29327  | -0.74551 |
| C | -3.37395 | 1.52501  | 0.73439  |
| C | -3.62385 | 2.41272  | -1.61659 |
| C | 2.65182  | 0.80516  | -0.52203 |
| C | 3.74594  | -0.06070 | -0.25942 |
| C | 4.71943  | 0.34347  | 0.66335  |
| C | 4.63262  | 1.56281  | 1.32721  |
| C | 3.55168  | 2.40230  | 1.07284  |

|   |          |          |          |
|---|----------|----------|----------|
| C | 2.75894  | 1.62772  | -3.20644 |
| C | 2.55198  | 2.05070  | 0.15913  |
| C | 3.89669  | -1.41393 | -0.95070 |
| C | 3.97079  | -2.56926 | 0.06640  |
| C | 5.12529  | -1.44415 | -1.88197 |
| C | 1.37593  | 3.00635  | -0.05417 |
| C | 1.83327  | 4.39971  | -0.52910 |
| C | 0.51504  | 3.13769  | 1.21854  |
| C | -1.09003 | -1.34257 | 1.98137  |
| C | 1.02576  | -0.48826 | 2.25994  |
| C | -1.26694 | -1.48824 | 3.34587  |
| C | -2.54133 | -0.90272 | -2.00278 |
| C | 0.94815  | -0.60113 | 3.64557  |
| C | -0.22787 | -1.10875 | 4.20882  |
| C | -1.82055 | 0.48903  | -4.42649 |
| C | -0.83327 | 0.21456  | -3.29844 |
| C | 0.46026  | 0.74551  | -3.51948 |
| C | -2.95361 | -2.17890 | -2.46734 |
| C | -4.26509 | -2.59309 | -2.19963 |
| C | -5.15079 | -1.79413 | -1.48395 |
| C | -4.73051 | -0.55306 | -1.01360 |
| C | -3.43256 | -0.08789 | -1.25259 |
| C | -2.02744 | -3.09668 | -3.26499 |
| H | -1.93182 | 1.56963  | -4.56593 |
| H | -2.80447 | 0.06065  | -4.24055 |
| H | -1.43342 | 0.08543  | -5.36780 |
| H | 0.59517  | 1.19607  | -4.49626 |
| H | 2.58113  | 1.95626  | -4.23169 |
| H | 3.64745  | 0.98791  | -3.19586 |
| H | 2.99993  | 2.50436  | -2.59947 |
| H | -4.59586 | -3.56317 | -2.55975 |
| H | -6.16387 | -2.13735 | -1.29197 |
| H | -5.42446 | 0.06912  | -0.45490 |
| H | -1.01594 | -2.69029 | -3.18297 |
| H | -1.70904 | -3.76094 | -5.31927 |
| H | -2.39231 | -2.13216 | -5.20983 |
| H | -3.41398 | -3.54002 | -4.89905 |
| H | -1.23225 | -5.12025 | -3.23090 |
| H | -2.95345 | -5.04645 | -2.85078 |
| H | -1.75734 | -4.53922 | -1.64245 |
| H | -1.92966 | 1.36001  | -0.83413 |
| H | -2.97648 | 2.48941  | 1.07023  |
| H | -2.95145 | 0.74759  | 1.37714  |
| H | -4.45689 | 1.54484  | 0.90052  |
| H | -3.27739 | 3.39673  | -1.27961 |
| H | -4.71859 | 2.40495  | -1.55894 |
| H | -3.34651 | 2.29918  | -2.66828 |
| H | 5.56393  | -0.31151 | 0.86173  |
| H | 5.40149  | 1.85777  | 2.03651  |
| H | 3.48094  | 3.35237  | 1.59669  |
| H | 3.00472  | -1.57225 | -1.56297 |
| H | 4.01473  | -3.53207 | -0.45385 |
| H | 3.09065  | -2.58390 | 0.71420  |
| H | 4.86315  | -2.49364 | 0.69863  |
| H | 5.18462  | -2.40401 | -2.40724 |
| H | 6.05638  | -1.31684 | -1.31723 |
| H | 5.08639  | -0.65078 | -2.63515 |
| H | 0.73787  | 2.58365  | -0.83379 |
| H | 0.96542  | 5.03549  | -0.73734 |
| H | 2.43247  | 4.34297  | -1.44299 |
| H | 2.43753  | 4.90798  | 0.23078  |
| H | -0.33401 | 3.80782  | 1.03971  |
| H | 1.09364  | 3.55294  | 2.05206  |
| H | 0.11854  | 2.16864  | 1.53410  |



|    |          |          |          |
|----|----------|----------|----------|
| H  | -1.87200 | -1.64275 | 1.29180  |
| H  | 1.92545  | -0.09671 | 1.80096  |
| H  | -2.18696 | -1.89047 | 3.75435  |
| H  | 1.79355  | -0.29411 | 4.24817  |
| N  | -1.20199 | -0.44499 | -2.20872 |
| N  | 1.60475  | 0.39941  | -1.40289 |
| N  | 0.03527  | -0.84172 | 1.42424  |
| O  | -0.45257 | -1.26900 | 5.53023  |
| O  | 0.81723  | -3.28925 | -0.39675 |
| O  | -0.35064 | -2.82036 | -0.57973 |
| Cu | 0.14701  | -0.83175 | -0.76745 |

51.  $L^1CuX$ , X = N,N-dimethyl-4-pyridinamine

|   |          |          |          |
|---|----------|----------|----------|
| C | 3.09007  | -5.14015 | -3.06064 |
| C | 1.64161  | -4.33681 | -4.90576 |
| C | -2.81521 | 3.70598  | 0.17654  |
| C | 1.95063  | 0.72533  | 2.28411  |
| C | 1.73980  | -0.41232 | 3.10895  |
| C | 2.85036  | -1.10133 | 3.60850  |
| C | 4.14953  | -0.69454 | 3.31650  |
| C | 4.34865  | 0.42001  | 2.50614  |
| C | 3.27241  | 1.14375  | 1.98022  |
| C | 0.33273  | -0.92312 | 3.41254  |
| C | 0.08675  | -1.13667 | 4.91667  |
| C | 0.02976  | -2.21206 | 2.62179  |
| C | 3.53614  | 2.33073  | 1.05646  |
| C | 4.10605  | 1.85988  | -0.29702 |
| C | 4.45316  | 3.38787  | 1.69755  |
| C | -1.96840 | 1.75198  | -1.69222 |
| C | -3.00653 | 0.79112  | -1.80766 |
| C | -3.58546 | 0.56847  | -3.06232 |
| C | -3.16752 | 1.26809  | -4.19114 |
| C | -2.14970 | 2.21115  | -4.07074 |
| C | -1.53829 | 2.47240  | -2.83964 |
| C | -3.46821 | -0.02861 | -0.60453 |
| C | -3.01919 | -1.49885 | -0.72772 |
| C | -4.98866 | 0.05911  | -0.37872 |
| C | -0.39015 | 3.47691  | -2.76117 |
| C | -0.72276 | 4.82094  | -3.43355 |
| C | 0.90487  | 2.87997  | -3.34832 |
| C | 1.96435  | -1.64302 | -0.86217 |
| C | 0.51403  | -1.03004 | -2.52949 |
| C | 2.41849  | -2.73180 | -1.58539 |
| C | 0.91019  | -2.08734 | -3.32959 |
| C | 1.89666  | -2.99614 | -2.87487 |
| C | 0.64142  | 2.86601  | 3.59626  |
| C | 0.18377  | 2.36694  | 2.23377  |
| C | -0.93745 | 3.01887  | 1.66972  |
| C | -1.61487 | 2.81127  | 0.44597  |
| H | 3.56850  | -5.70957 | -3.86024 |
| H | 2.47038  | -5.82898 | -2.46691 |
| H | 3.88021  | -4.75320 | -2.41673 |
| H | 1.65583  | -3.46038 | -5.56053 |
| H | 2.17433  | -5.13991 | -5.41758 |
| H | 0.59656  | -4.65069 | -4.76777 |
| H | 0.04269  | 3.71430  | 3.93276  |
| H | 1.69250  | 3.17213  | 3.56621  |
| H | 0.56941  | 2.07149  | 4.34707  |
| H | -1.35130 | 3.81083  | 2.28241  |
| H | -2.96126 | 4.43278  | 0.97755  |
| H | -3.72874 | 3.10880  | 0.07972  |
| H | -2.69571 | 4.24663  | -0.76779 |
| H | 2.69476  | -1.97578 | 4.23573  |
| H | 4.99901  | -1.24200 | 3.71644  |
| H | 5.36324  | 0.73378  | 2.27335  |
| H | -0.37307 | -0.16377 | 3.06722  |
| H | -0.95708 | -1.41854 | 5.09580  |
| H | 0.29358  | -0.22675 | 5.48944  |
| H | 0.71472  | -1.93584 | 5.32648  |
| H | -0.99167 | -2.55919 | 2.81783  |
| H | 0.71807  | -3.01950 | 2.89940  |
| H | 0.12546  | -2.04190 | 1.54474  |
| H | 2.57381  | 2.80787  | 0.85211  |
| H | 4.25776  | 2.70990  | -0.97275 |
| H | 3.42236  | 1.15857  | -0.78610 |
| H | 5.07183  | 1.35656  | -0.16896 |

|    |          |          |          |
|----|----------|----------|----------|
| H  | 4.56024  | 4.25409  | 1.03472  |
| H  | 5.45863  | 2.99572  | 1.88741  |
| H  | 4.05028  | 3.74116  | 2.65247  |
| H  | -4.37762 | -0.17030 | -3.15757 |
| H  | -3.63074 | 1.08070  | -5.15632 |
| H  | -1.82058 | 2.75409  | -4.95324 |
| H  | -2.97758 | 0.38464  | 0.28096  |
| H  | -3.32647 | -2.07518 | 0.15302  |
| H  | -1.93040 | -1.57043 | -0.81465 |
| H  | -3.46032 | -1.97653 | -1.61071 |
| H  | -5.27071 | -0.47188 | 0.53758  |
| H  | -5.55152 | -0.39172 | -1.20402 |
| H  | -5.31990 | 1.09825  | -0.28222 |
| H  | -0.19914 | 3.67665  | -1.70371 |
| H  | 0.08827  | 5.53899  | -3.26739 |
| H  | -1.64423 | 5.25412  | -3.03080 |
| H  | -0.85005 | 4.71972  | -4.51728 |
| H  | 1.73608  | 3.58945  | -3.26052 |
| H  | 0.78183  | 2.63589  | -4.41046 |
| H  | 1.18853  | 1.96361  | -2.82113 |
| H  | 2.37077  | -1.44099 | 0.12377  |
| H  | -0.25202 | -0.34485 | -2.87828 |
| H  | 3.17658  | -3.35926 | -1.13545 |
| H  | 0.43481  | -2.20453 | -4.29441 |
| N  | 2.31587  | -4.05383 | -3.64566 |
| N  | 1.01541  | -0.78497 | -1.29880 |
| N  | 0.84184  | 1.36278  | 1.65943  |
| N  | -1.27186 | 1.89964  | -0.46081 |
| Cu | 0.28027  | 0.70194  | -0.12595 |

52.  $L^1CuXO_2$   $\eta^1$  singlet, X = N,N-dimethyl-4-pyridinamine

|   |          |          |          |
|---|----------|----------|----------|
| C | 4.45279  | -4.63257 | -3.92538 |
| C | 3.31441  | -3.46305 | -5.82993 |
| H | 2.34134  | -3.87656 | -6.13125 |
| H | 3.35350  | -2.41395 | -6.14267 |
| H | 4.09573  | -3.99871 | -6.37048 |
| H | 5.05741  | -4.98826 | -4.76059 |
| H | 3.91307  | -5.49032 | -3.49947 |
| H | 5.13597  | -4.24409 | -3.16253 |
| C | -2.83494 | 2.73593  | -0.23787 |
| C | 0.44657  | -2.98542 | 3.78488  |
| C | 3.25891  | 1.26467  | 0.30248  |
| C | 4.23600  | 0.81887  | -0.80022 |
| C | 3.61736  | 2.68127  | 0.79698  |
| C | -1.77509 | 0.87149  | -2.09721 |
| C | -2.69883 | -0.13779 | -2.47305 |
| C | -3.10146 | -0.21394 | -3.81114 |
| C | -2.60931 | 0.66628  | -4.77003 |
| C | -1.69548 | 1.64802  | -4.39443 |
| C | -1.26435 | 1.77554  | -3.06921 |
| C | 1.93779  | -0.08997 | 2.04468  |
| C | -3.26313 | -1.13170 | -1.45898 |
| C | -2.88156 | -2.58421 | -1.80562 |
| C | -4.79015 | -0.98771 | -1.30919 |
| C | -0.22993 | 2.84776  | -2.71930 |
| C | -0.66549 | 4.25588  | -3.16970 |
| C | 1.15678  | 2.50791  | -3.30286 |
| C | 2.02861  | -2.42280 | -1.25349 |
| C | 0.98880  | -1.34114 | -2.98865 |
| C | 2.85225  | -3.12582 | -2.11253 |
| C | 1.76160  | -2.00017 | -3.92913 |
| C | 1.89512  | -0.99703 | 3.13602  |
| C | 2.74841  | -2.92619 | -3.51041 |

|    |          |          |          |
|----|----------|----------|----------|
| C  | 0.55091  | 2.14371  | 3.23044  |
| C  | 0.08922  | 1.46460  | 1.94739  |
| C  | -1.06266 | 2.04507  | 1.36110  |
| C  | -1.66903 | 1.82459  | 0.11018  |
| C  | 3.10779  | -1.48339 | 3.64147  |
| C  | 4.33220  | -1.10751 | 3.09972  |
| C  | 4.36274  | -0.23078 | 2.01922  |
| C  | 3.18380  | 0.28180  | 1.46846  |
| C  | 0.59243  | -1.45060 | 3.79332  |
| C  | 0.47696  | -0.92449 | 5.23940  |
| H  | 0.58524  | 3.22779  | 3.08584  |
| H  | 1.53270  | 1.80076  | 3.55556  |
| H  | -0.16507 | 1.94839  | 4.03581  |
| H  | -1.50448 | 2.84456  | 1.94558  |
| H  | -3.23143 | 3.21889  | 0.65715  |
| H  | -3.63780 | 2.17304  | -0.72077 |
| H  | -2.52819 | 3.52013  | -0.93715 |
| H  | 3.08774  | -2.17230 | 4.48163  |
| H  | 5.25773  | -1.49603 | 3.51646  |
| H  | 5.31970  | 0.06434  | 1.59771  |
| H  | -0.23589 | -1.04490 | 3.20751  |
| H  | -0.49089 | -1.20571 | 5.67020  |
| H  | 0.56760  | 0.16365  | 5.29475  |
| H  | 1.25794  | -1.35317 | 5.87822  |
| H  | -0.52624 | -3.26892 | 4.20326  |
| H  | 1.21658  | -3.46411 | 4.40236  |
| H  | 0.50998  | -3.38862 | 2.77216  |
| H  | 2.26173  | 1.31489  | -0.14449 |
| H  | 4.16586  | 1.49621  | -1.65885 |
| H  | 4.01270  | -0.19406 | -1.14926 |
| H  | 5.27813  | 0.83549  | -0.46078 |
| H  | 3.63094  | 3.39280  | -0.03709 |
| H  | 4.60876  | 2.69332  | 1.26536  |
| H  | 2.89671  | 3.04299  | 1.53659  |
| H  | -3.81318 | -0.98048 | -4.10631 |
| H  | -2.93417 | 0.58804  | -5.80418 |
| H  | -1.30638 | 2.32913  | -5.14719 |
| H  | -2.81576 | -0.90417 | -0.48822 |
| H  | -3.27623 | -3.27216 | -1.04964 |
| H  | -1.79616 | -2.71459 | -1.83341 |
| H  | -3.29027 | -2.88661 | -2.77717 |
| H  | -5.16350 | -1.66605 | -0.53369 |
| H  | -5.31253 | -1.23173 | -2.24148 |
| H  | -5.07212 | 0.03255  | -1.02822 |
| H  | -0.12027 | 2.86874  | -1.63248 |
| H  | 0.04506  | 5.00798  | -2.80885 |
| H  | -1.65671 | 4.51698  | -2.78562 |
| H  | -0.70357 | 4.34079  | -4.26140 |
| H  | 1.88833  | 3.27725  | -3.02900 |
| H  | 1.12456  | 2.45381  | -4.39748 |
| H  | 1.52413  | 1.54748  | -2.92941 |
| H  | 2.09474  | -2.59424 | -0.18388 |
| H  | 0.22882  | -0.63527 | -3.30815 |
| H  | 3.55887  | -3.82812 | -1.69041 |
| H  | 1.58375  | -1.79697 | -4.97700 |
| N  | 1.10641  | -1.52874 | -1.65998 |
| N  | 0.74479  | 0.42564  | 1.44796  |
| N  | -1.27204 | 0.90042  | -0.76506 |
| N  | 3.55410  | -3.58943 | -4.39963 |
| O  | -0.02940 | -3.29916 | 0.53536  |
| O  | -0.51975 | -2.14635 | 0.79457  |
| Cu | 0.01007  | -0.51857 | -0.17595 |

53.  $L^1CuXO_2$   $\eta^1$  triplet, X = N,N-dimethyl-4-pyridinamine

|   |          |          |          |
|---|----------|----------|----------|
| C | 4.27374  | -5.06620 | -3.73771 |
| C | 2.69579  | -4.41562 | -5.57596 |
| H | 1.71313  | -4.90534 | -5.52006 |
| H | 2.58679  | -3.48936 | -6.14930 |
| H | 3.37106  | -5.06777 | -6.13109 |
| H | 4.72190  | -5.61467 | -4.56706 |
| H | 3.85724  | -5.79509 | -3.02769 |
| H | 5.07598  | -4.51675 | -3.23462 |
| C | -2.93215 | 2.59751  | -0.20976 |
| C | 0.87104  | -3.27879 | 3.27119  |
| C | 3.22677  | 1.81819  | 0.67898  |
| C | 4.12902  | 1.49638  | -0.52819 |
| C | 3.64034  | 3.15288  | 1.32900  |
| C | -1.76031 | 0.89982  | -2.12634 |
| C | -2.71893 | -0.06827 | -2.52628 |
| C | -3.15494 | -0.07727 | -3.85706 |
| C | -2.65929 | 0.82551  | -4.79259 |
| C | -1.70092 | 1.75608  | -4.39994 |
| C | -1.23744 | 1.81502  | -3.08150 |
| C | 1.99673  | 0.05330  | 2.09271  |
| C | -3.27614 | -1.10093 | -1.54771 |
| C | -3.01722 | -2.54234 | -2.02972 |
| C | -4.77919 | -0.89246 | -1.27743 |
| C | -0.15370 | 2.82881  | -2.71307 |
| C | -0.54766 | 4.27508  | -3.06581 |
| C | 1.19373  | 2.46213  | -3.36763 |
| C | 2.39312  | -2.20327 | -1.25308 |
| C | 0.95609  | -1.59493 | -2.93733 |
| C | 3.05320  | -3.10390 | -2.06938 |
| C | 1.54972  | -2.47184 | -3.82817 |
| C | 2.02322  | -1.02355 | 3.01774  |
| C | 2.64156  | -3.27200 | -3.41364 |
| C | 0.33310  | 2.02341  | 3.36305  |
| C | -0.00907 | 1.39450  | 2.01617  |
| C | -1.18271 | 1.90668  | 1.41376  |
| C | -1.72844 | 1.72777  | 0.12484  |
| C | 3.25518  | -1.41797 | 3.55379  |
| C | 4.44361  | -0.79356 | 3.18904  |
| C | 4.41142  | 0.24337  | 2.26124  |
| C | 3.20830  | 0.67968  | 1.69682  |
| C | 0.75263  | -1.75268 | 3.45049  |
| C | 0.37133  | -1.42256 | 4.90773  |
| H | 0.51568  | 3.09681  | 3.24106  |
| H | 1.21382  | 1.57623  | 3.82293  |
| H | -0.51210 | 1.91927  | 4.05159  |
| H | -1.71305 | 2.62614  | 2.02858  |
| H | -3.32263 | 3.09245  | 0.68133  |
| H | -3.73299 | 2.00712  | -0.66324 |
| H | -2.66209 | 3.37013  | -0.93788 |
| H | 3.28227  | -2.23206 | 4.27361  |
| H | 5.38731  | -1.11475 | 3.62214  |
| H | 5.34023  | 0.72768  | 1.96990  |
| H | -0.05935 | -1.40672 | 2.80574  |
| H | -0.56275 | -1.92493 | 5.18481  |
| H | 0.23224  | -0.34825 | 5.05651  |
| H | 1.14875  | -1.75738 | 5.60445  |
| H | -0.08724 | -3.76263 | 3.49142  |
| H | 1.61768  | -3.70993 | 3.94791  |
| H | 1.15192  | -3.54401 | 2.24841  |
| H | 2.20793  | 1.93647  | 0.30096  |
| H | 4.07932  | 2.30193  | -1.26981 |
| H | 3.81837  | 0.56863  | -1.01910 |
| H | 5.17873  | 1.38454  | -0.23334 |

|    |          |          |          |
|----|----------|----------|----------|
| H  | 3.59405  | 3.97002  | 0.59972  |
| H  | 4.66578  | 3.10883  | 1.71417  |
| H  | 2.98294  | 3.40877  | 2.16598  |
| H  | -3.89793 | -0.80860 | -4.16530 |
| H  | -3.01346 | 0.80190  | -5.81986 |
| H  | -1.30230 | 2.45208  | -5.13406 |
| H  | -2.74778 | -0.97033 | -0.59997 |
| H  | -3.34375 | -3.26464 | -1.27316 |
| H  | -1.95418 | -2.71660 | -2.22028 |
| H  | -3.56412 | -2.76243 | -2.95379 |
| H  | -5.14344 | -1.62311 | -0.54597 |
| H  | -5.37050 | -1.01494 | -2.19232 |
| H  | -4.98413 | 0.10717  | -0.88180 |
| H  | -0.01010 | 2.78180  | -1.63091 |
| H  | 0.21598  | 4.97601  | -2.71016 |
| H  | -1.50120 | 4.55628  | -2.60734 |
| H  | -0.64605 | 4.42042  | -4.14756 |
| H  | 1.97476  | 3.17269  | -3.07207 |
| H  | 1.12213  | 2.48078  | -4.46153 |
| H  | 1.51925  | 1.46106  | -3.06904 |
| H  | 2.70158  | -2.08124 | -0.21908 |
| H  | 0.11551  | -0.98537 | -3.25315 |
| H  | 3.86748  | -3.68017 | -1.64947 |
| H  | 1.14840  | -2.53657 | -4.83106 |
| N  | 1.35008  | -1.44631 | -1.65467 |
| N  | 0.77469  | 0.46463  | 1.48082  |
| N  | -1.24338 | 0.89856  | -0.79909 |
| N  | 3.26482  | -4.15183 | -4.26013 |
| O  | -0.43425 | -3.32151 | 0.15550  |
| O  | -0.75148 | -2.17728 | 0.50926  |
| Cu | 0.29366  | -0.32202 | -0.29278 |

54.  $L^1CuXO_2$   $\eta^2$  singlet, X = N,N-dimethyl-4-pyridinamine

|   |          |          |          |
|---|----------|----------|----------|
| C | -2.01046 | -2.57505 | 5.06417  |
| C | -0.13055 | -1.07649 | 5.70562  |
| H | 0.95807  | -1.12907 | 5.61729  |
| H | -0.43128 | -0.02001 | 5.64962  |
| H | -0.39629 | -1.45742 | 6.69284  |
| H | -1.98142 | -2.79817 | 6.13158  |
| H | -2.10165 | -3.52818 | 4.53579  |
| H | -2.91089 | -1.97747 | 4.85550  |
| C | 1.52830  | 0.89204  | -3.33528 |
| C | -2.82805 | -2.78645 | -5.45567 |
| C | -2.10503 | -4.38516 | -3.64612 |
| C | -2.70318 | 1.06599  | -0.77508 |
| C | -3.05900 | 1.14617  | 0.72029  |
| C | -3.17759 | 2.34500  | -1.49438 |
| C | 2.73793  | 0.72685  | -1.27677 |
| C | 3.92239  | -0.04136 | -1.15918 |
| C | 4.92112  | 0.40324  | -0.28435 |
| C | 4.77783  | 1.57414  | 0.45237  |
| C | 3.61323  | 2.32655  | 0.32623  |
| C | 2.69739  | 1.65655  | -3.93598 |
| C | 2.57637  | 1.92660  | -0.52356 |
| C | 4.15140  | -1.31853 | -1.96298 |
| C | 4.35162  | -2.54150 | -1.04687 |
| C | 5.34366  | -1.17555 | -2.93149 |
| C | 1.32598  | 2.80737  | -0.62933 |
| C | 1.63639  | 4.16531  | -1.29400 |
| C | 0.65207  | 3.04866  | 0.73651  |
| C | -0.97195 | -1.96191 | 0.99952  |
| C | 0.82764  | -0.68762 | 1.59010  |
| C | -1.29402 | -2.21872 | 2.32265  |

|    |          |          |          |
|----|----------|----------|----------|
| C  | -2.47334 | -0.90342 | -2.41775 |
| C  | 0.59273  | -0.88127 | 2.94282  |
| C  | -0.50062 | -1.67487 | 3.35982  |
| C  | -2.02532 | 0.73650  | -4.72449 |
| C  | -0.91091 | 0.33421  | -3.76711 |
| C  | 0.36132  | 0.84725  | -4.10621 |
| C  | -2.98861 | -2.07954 | -3.02438 |
| C  | -4.28759 | -2.48423 | -2.68907 |
| C  | -5.06023 | -1.77544 | -1.77599 |
| C  | -4.53348 | -0.64262 | -1.16434 |
| C  | -3.24225 | -0.19162 | -1.45788 |
| C  | -2.20602 | -2.90109 | -4.04769 |
| H  | -2.05847 | 1.82628  | -4.81902 |
| H  | -3.00490 | 0.38046  | -4.40916 |
| H  | -1.81257 | 0.33628  | -5.72131 |
| H  | 0.40358  | 1.37813  | -5.04978 |
| H  | 2.40714  | 2.15517  | -4.86221 |
| H  | 3.51307  | 0.96106  | -4.16106 |
| H  | 3.10054  | 2.39994  | -3.24626 |
| H  | -4.70108 | -3.37212 | -3.15877 |
| H  | -6.06822 | -2.10574 | -1.53933 |
| H  | -5.13813 | -0.09626 | -0.44654 |
| H  | -1.18870 | -2.50523 | -4.08571 |
| H  | -2.22413 | -3.33722 | -6.18557 |
| H  | -2.90083 | -1.74920 | -5.79321 |
| H  | -3.83865 | -3.21082 | -5.47607 |
| H  | -1.47778 | -4.92374 | -4.36523 |
| H  | -3.08691 | -4.87260 | -3.63898 |
| H  | -1.65429 | -4.49439 | -2.65823 |
| H  | -1.61215 | 1.02930  | -0.84975 |
| H  | -2.53352 | 1.98922  | 1.18233  |
| H  | -2.77189 | 0.23610  | 1.25307  |
| H  | -4.13096 | 1.30959  | 0.88040  |
| H  | -2.75784 | 3.23714  | -1.01502 |
| H  | -4.27021 | 2.42853  | -1.46029 |
| H  | -2.87627 | 2.35616  | -2.54472 |
| H  | 5.83502  | -0.17690 | -0.18971 |
| H  | 5.57217  | 1.90298  | 1.11704  |
| H  | 3.50762  | 3.24553  | 0.89712  |
| H  | 3.25605  | -1.50226 | -2.56173 |
| H  | 4.48412  | -3.44584 | -1.65110 |
| H  | 3.48242  | -2.69656 | -0.40414 |
| H  | 5.24150  | -2.42991 | -0.41596 |
| H  | 5.43684  | -2.07423 | -3.55146 |
| H  | 6.28892  | -1.04832 | -2.39133 |
| H  | 5.22923  | -0.31593 | -3.59991 |
| H  | 0.60329  | 2.28640  | -1.26185 |
| H  | 0.72172  | 4.76173  | -1.38785 |
| H  | 2.05937  | 4.04873  | -2.29530 |
| H  | 2.35043  | 4.74482  | -0.69752 |
| H  | -0.25309 | 3.65276  | 0.60626  |
| H  | 1.30980  | 3.59164  | 1.42500  |
| H  | 0.36223  | 2.11136  | 1.21768  |
| H  | -1.57523 | -2.38755 | 0.20485  |
| H  | 1.67932  | -0.09557 | 1.27273  |
| H  | -2.16555 | -2.82456 | 2.53412  |
| H  | 1.26018  | -0.41209 | 3.65390  |
| N  | -1.15281 | -0.43620 | -2.71704 |
| N  | 1.67630  | 0.31008  | -2.13843 |
| N  | 0.06513  | -1.19830 | 0.60722  |
| N  | -0.77694 | -1.89948 | 4.68981  |
| O  | 1.35113  | -2.87946 | -1.65959 |
| O  | 0.02527  | -2.98958 | -1.68692 |
| Cu | 0.42371  | -1.13366 | -1.67273 |

55.  $L^1CuXO_2$   $\eta^2$  triplet, X = N,N-dimethyl-4-pyridinamine

|   |          |          |          |
|---|----------|----------|----------|
| C | -1.46301 | -2.04332 | 5.45548  |
| C | 0.84370  | -1.07678 | 5.74654  |
| H | 1.80377  | -1.55258 | 5.51505  |
| H | 0.97488  | 0.01157  | 5.67007  |
| H | 0.59601  | -1.31619 | 6.78103  |
| H | -1.35458 | -2.09621 | 6.53914  |
| H | -1.71398 | -3.04789 | 5.09479  |
| H | -2.30608 | -1.37674 | 5.22840  |
| C | 1.45768  | 1.02190  | -3.24704 |
| C | -2.43304 | -2.81012 | -5.76186 |
| C | -1.73930 | -4.38134 | -3.91741 |
| C | -3.11188 | 0.93321  | -1.05891 |
| C | -3.61575 | 0.98416  | 0.39490  |
| C | -3.61812 | 2.16700  | -1.83413 |
| C | 2.67390  | 0.71007  | -1.20739 |
| C | 3.76480  | -0.19141 | -1.11856 |
| C | 4.80557  | 0.09551  | -0.22654 |
| C | 4.78950  | 1.23574  | 0.57062  |
| C | 3.71214  | 2.11326  | 0.48387  |
| C | 2.63966  | 1.80815  | -3.79659 |
| C | 2.64478  | 1.87502  | -0.38995 |
| C | 3.83893  | -1.45748 | -1.96758 |
| C | 3.94998  | -2.72243 | -1.09530 |
| C | 5.00402  | -1.39952 | -2.97622 |
| C | 1.47877  | 2.86605  | -0.42544 |
| C | 1.92913  | 4.27864  | -0.84861 |
| C | 0.74184  | 2.92724  | 0.92813  |
| C | -0.98818 | -1.61239 | 1.26839  |
| C | 1.10270  | -0.71613 | 1.53782  |
| C | -1.14274 | -1.80129 | 2.63045  |
| C | -2.55580 | -0.97673 | -2.68586 |
| C | 1.04777  | -0.86792 | 2.91262  |
| C | -0.10767 | -1.41617 | 3.51695  |
| C | -1.97666 | 0.72987  | -4.94214 |
| C | -0.95065 | 0.38866  | -3.86689 |
| C | 0.31786  | 0.98254  | -4.06888 |
| C | -2.90001 | -2.18414 | -3.34631 |
| C | -4.17227 | -2.72674 | -3.12179 |
| C | -5.08187 | -2.12173 | -2.26126 |
| C | -4.72427 | -0.95255 | -1.59568 |
| C | -3.46932 | -0.36557 | -1.78324 |
| C | -1.94705 | -2.90219 | -4.30086 |
| H | -2.05016 | 1.81704  | -5.04899 |
| H | -2.96666 | 0.33088  | -4.72428 |
| H | -1.64972 | 0.33728  | -5.91066 |
| H | 0.40324  | 1.54228  | -4.99335 |
| H | 2.36693  | 2.34956  | -4.70397 |
| H | 3.46315  | 1.12685  | -4.03832 |
| H | 3.02973  | 2.52128  | -3.06740 |
| H | -4.45218 | -3.64432 | -3.63192 |
| H | -6.06435 | -2.55981 | -2.10643 |
| H | -5.43652 | -0.48583 | -0.92104 |
| H | -0.97519 | -2.40493 | -4.23505 |
| H | -1.70694 | -3.27733 | -6.43691 |
| H | -2.57706 | -1.77569 | -6.08436 |
| H | -3.38813 | -3.33243 | -5.89034 |
| H | -0.98447 | -4.83571 | -4.56951 |
| H | -2.66200 | -4.96154 | -4.03443 |
| H | -1.40269 | -4.47984 | -2.88440 |
| H | -2.01930 | 0.99614  | -1.02878 |
| H | -3.21583 | 1.87193  | 0.89770  |



|    |          |          |          |
|----|----------|----------|----------|
| H  | -3.29908 | 0.10568  | 0.96492  |
| H  | -4.70832 | 1.04653  | 0.45305  |
| H  | -3.32740 | 3.09230  | -1.32263 |
| H  | -4.71152 | 2.15506  | -1.91304 |
| H  | -3.21067 | 2.20145  | -2.84799 |
| H  | 5.64830  | -0.58779 | -0.16022 |
| H  | 5.61107  | 1.44095  | 1.25202  |
| H  | 3.69812  | 3.00300  | 1.10886  |
| H  | 2.90598  | -1.52994 | -2.53379 |
| H  | 3.94634  | -3.61935 | -1.72410 |
| H  | 3.10881  | -2.80016 | -0.40233 |
| H  | 4.87910  | -2.72973 | -0.51322 |
| H  | 4.99980  | -2.28841 | -3.61735 |
| H  | 5.97313  | -1.36473 | -2.46466 |
| H  | 4.94169  | -0.51792 | -3.62243 |
| H  | 0.76099  | 2.51038  | -1.16849 |
| H  | 1.06626  | 4.95091  | -0.91640 |
| H  | 2.42490  | 4.27348  | -1.82405 |
| H  | 2.62794  | 4.71226  | -0.12421 |
| H  | -0.10778 | 3.61776  | 0.87060  |
| H  | 1.40101  | 3.28164  | 1.72934  |
| H  | 0.35932  | 1.94469  | 1.21966  |
| H  | -1.77749 | -1.91619 | 0.58813  |
| H  | 1.98552  | -0.28863 | 1.07856  |
| H  | -2.06285 | -2.24231 | 2.99185  |
| H  | 1.89886  | -0.54948 | 3.50027  |
| N  | -1.26225 | -0.39135 | -2.84071 |
| N  | 1.56424  | 0.42032  | -2.05834 |
| N  | 0.10457  | -1.06269 | 0.70020  |
| N  | -0.21620 | -1.56669 | 4.87376  |
| O  | 0.77933  | -3.36030 | -1.47335 |
| O  | -0.38753 | -2.85815 | -1.44669 |
| Cu | 0.11091  | -0.84291 | -1.43415 |

56. L<sup>1</sup>CuX, X = 4-oxypyridine

|   |          |          |          |
|---|----------|----------|----------|
| C | -2.82084 | 2.31938  | -0.36204 |
| C | 1.92884  | -0.55864 | 1.85587  |
| C | 1.68456  | -1.61412 | 2.77509  |
| C | 2.77333  | -2.26867 | 3.35901  |
| C | 4.08482  | -1.90747 | 3.05866  |
| C | 4.31647  | -0.88194 | 2.14648  |
| C | 3.26149  | -0.19789 | 1.53265  |
| C | 0.26205  | -2.08765 | 3.06815  |
| C | -0.02749 | -2.24430 | 4.57142  |
| C | -0.04121 | -3.39620 | 2.30985  |
| C | 3.55925  | 0.88779  | 0.50091  |
| C | 4.19769  | 0.29143  | -0.76888 |
| C | 4.43313  | 2.01792  | 1.07605  |
| C | -1.96307 | 0.32322  | -2.14719 |
| C | -3.00574 | -0.63424 | -2.23658 |
| C | -3.61569 | -0.85859 | -3.47561 |
| C | -3.22305 | -0.16431 | -4.61604 |
| C | -2.19372 | 0.76954  | -4.52395 |
| C | -1.55231 | 1.03100  | -3.30926 |
| C | -3.43138 | -1.45452 | -1.02161 |
| C | -2.98480 | -2.92328 | -1.16400 |
| C | -4.94359 | -1.36234 | -0.74728 |
| C | -0.38300 | 2.01254  | -3.26166 |
| C | -0.70146 | 3.36132  | -3.93166 |
| C | 0.88482  | 1.38061  | -3.87133 |
| C | 2.06354  | -3.04911 | -1.18863 |
| C | 0.60922  | -2.56413 | -2.91070 |
| C | 2.61772  | -4.09578 | -1.88130 |
| C | 1.09828  | -3.58749 | -3.68246 |
| C | 2.16874  | -4.45690 | -3.21772 |
| C | 0.65985  | 1.64162  | 3.06439  |
| C | 0.19504  | 1.08517  | 1.72387  |
| C | -0.92902 | 1.71785  | 1.14603  |
| C | -1.60868 | 1.44549  | -0.06271 |
| H | 0.07946  | 2.52087  | 3.35248  |
| H | 1.71902  | 1.91729  | 3.02843  |
| H | 0.56293  | 0.88915  | 3.85473  |
| H | -1.34315 | 2.53304  | 1.72827  |
| H | -2.97494 | 3.06850  | 0.41766  |
| H | -3.72800 | 1.71007  | -0.44297 |
| H | -2.70739 | 2.83267  | -1.32231 |
| H | 2.59181  | -3.08431 | 4.05500  |
| H | 4.91803  | -2.43033 | 3.52145  |
| H | 5.33983  | -0.61123 | 1.89649  |
| H | -0.42281 | -1.32948 | 2.67997  |
| H | -1.08170 | -2.50095 | 4.73007  |
| H | 0.18095  | -1.31971 | 5.12115  |
| H | 0.57192  | -3.04210 | 5.02525  |
| H | -1.07899 | -3.71098 | 2.47603  |
| H | 0.61537  | -4.20776 | 2.64608  |
| H | 0.10728  | -3.26772 | 1.23377  |
| H | 2.60143  | 1.32559  | 0.20670  |
| H | 4.36426  | 1.07283  | -1.52068 |
| H | 3.55330  | -0.47368 | -1.21045 |
| H | 5.16704  | -0.17138 | -0.54820 |
| H | 4.57762  | 2.80936  | 0.33075  |
| H | 5.42637  | 1.65507  | 1.36599  |
| H | 3.97417  | 2.46959  | 1.96235  |
| H | -4.40758 | -1.60034 | -3.55050 |
| H | -3.70586 | -0.35745 | -5.57086 |
| H | -1.87406 | 1.29907  | -5.41839 |
| H | -2.91202 | -1.04136 | -0.15242 |
| H | -3.24954 | -3.49888 | -0.26835 |

|    |          |          |          |
|----|----------|----------|----------|
| H  | -1.90237 | -2.99072 | -1.30515 |
| H  | -3.46682 | -3.40179 | -2.02486 |
| H  | -5.20003 | -1.90212 | 0.17220  |
| H  | -5.53320 | -1.80333 | -1.55960 |
| H  | -5.26799 | -0.32237 | -0.63039 |
| H  | -0.16507 | 2.21237  | -2.20965 |
| H  | 0.13285  | 4.05974  | -3.79541 |
| H  | -1.59951 | 3.82164  | -3.50465 |
| H  | -0.86388 | 3.25699  | -5.01077 |
| H  | 1.73773  | 2.06629  | -3.79168 |
| H  | 0.73808  | 1.14675  | -4.93255 |
| H  | 1.14521  | 0.45161  | -3.35594 |
| H  | 2.42274  | -2.80088 | -0.19204 |
| H  | -0.19384 | -1.93214 | -3.28449 |
| H  | 3.41719  | -4.68064 | -1.43342 |
| H  | 0.68412  | -3.76779 | -4.67137 |
| O  | 2.64522  | -5.40028 | -3.88539 |
| N  | 1.05753  | -2.25160 | -1.65767 |
| N  | 0.84297  | 0.06007  | 1.18248  |
| N  | -1.25718 | 0.50097  | -0.92736 |
| Cu | 0.30435  | -0.75312 | -0.59929 |

57.  $L^1CuXO_2$   $\eta^1$  singlet, X = 4-oxypyridine

|   |          |          |          |
|---|----------|----------|----------|
| C | -2.84772 | 2.06069  | -0.32957 |
| C | 1.96829  | -0.72006 | 1.89736  |
| C | 1.91928  | -1.58942 | 3.01862  |
| C | 3.12364  | -2.08662 | 3.53084  |
| C | 4.35126  | -1.76001 | 2.96353  |
| C | 4.38807  | -0.92642 | 1.84995  |
| C | 3.21490  | -0.40424 | 1.29475  |
| C | 0.60763  | -1.99580 | 3.68852  |
| C | 0.49661  | -1.42067 | 5.11561  |
| C | 0.42922  | -3.52558 | 3.72342  |
| C | 3.30169  | 0.51264  | 0.07645  |
| C | 4.11718  | -0.10668 | -1.07363 |
| C | 3.85809  | 1.89803  | 0.46240  |
| C | -1.79848 | 0.24749  | -2.20317 |
| C | -2.75813 | -0.73643 | -2.55691 |
| C | -3.22561 | -0.77907 | -3.87459 |
| C | -2.76384 | 0.10974  | -4.84037 |
| C | -1.80925 | 1.06080  | -4.49130 |
| C | -1.31170 | 1.15182  | -3.18678 |
| C | -3.27394 | -1.75601 | -1.54347 |
| C | -2.91371 | -3.19612 | -1.95705 |
| C | -4.79065 | -1.61652 | -1.30922 |
| C | -0.22770 | 2.18400  | -2.87034 |
| C | -0.64928 | 3.61782  | -3.24514 |
| C | 1.10639  | 1.82584  | -3.55543 |
| C | 1.76354  | -3.37039 | -1.36274 |
| C | 0.91522  | -2.05805 | -3.06760 |
| C | 2.48184  | -4.14060 | -2.24278 |
| C | 1.59311  | -2.76929 | -4.02313 |
| C | 2.46468  | -3.88130 | -3.67556 |
| C | 0.67421  | 1.59337  | 3.01954  |
| C | 0.15033  | 0.85555  | 1.79018  |
| C | -1.01863 | 1.42277  | 1.22774  |
| C | -1.64622 | 1.17896  | -0.00949 |
| H | 0.85316  | 2.64513  | 2.77091  |
| H | 1.59997  | 1.16422  | 3.40160  |
| H | -0.07413 | 1.57494  | 3.81934  |
| H | -1.45056 | 2.22978  | 1.81054  |
| H | -3.13916 | 2.65943  | 0.53620  |
| H | -3.70191 | 1.44825  | -0.63608 |

|    |          |          |          |
|----|----------|----------|----------|
| H  | -2.63543 | 2.73889  | -1.16129 |
| H  | 3.09533  | -2.74973 | 4.39195  |
| H  | 5.27221  | -2.16044 | 3.38053  |
| H  | 5.34478  | -0.67880 | 1.39754  |
| H  | -0.20897 | -1.59278 | 3.08499  |
| H  | -0.47509 | -1.67506 | 5.55594  |
| H  | 0.59939  | -0.33186 | 5.13210  |
| H  | 1.27312  | -1.83590 | 5.76966  |
| H  | -0.54661 | -3.77741 | 4.15746  |
| H  | 1.19514  | -4.00596 | 4.34469  |
| H  | 0.47107  | -3.95151 | 2.71831  |
| H  | 2.28288  | 0.66037  | -0.29133 |
| H  | 4.07720  | 0.54262  | -1.95599 |
| H  | 3.72298  | -1.08568 | -1.35810 |
| H  | 5.17380  | -0.22899 | -0.80680 |
| H  | 3.87281  | 2.56657  | -0.40698 |
| H  | 4.88456  | 1.82093  | 0.84186  |
| H  | 3.25072  | 2.37045  | 1.24199  |
| H  | -3.95909 | -1.53300 | -4.15054 |
| H  | -3.13503 | 0.05406  | -5.86074 |
| H  | -1.43290 | 1.74127  | -5.25174 |
| H  | -2.77189 | -1.56158 | -0.59273 |
| H  | -3.25593 | -3.90759 | -1.19693 |
| H  | -1.83265 | -3.31684 | -2.05862 |
| H  | -3.38325 | -3.46937 | -2.91034 |
| H  | -5.12392 | -2.32025 | -0.53717 |
| H  | -5.36284 | -1.83154 | -2.22004 |
| H  | -5.05843 | -0.60552 | -0.98170 |
| H  | -0.05075 | 2.16300  | -1.79241 |
| H  | 0.11704  | 4.33580  | -2.92976 |
| H  | -1.59305 | 3.90316  | -2.76862 |
| H  | -0.77899 | 3.73242  | -4.32756 |
| H  | 1.88256  | 2.55501  | -3.29223 |
| H  | 1.00454  | 1.82668  | -4.64720 |
| H  | 1.45551  | 0.83460  | -3.25493 |
| H  | 1.78001  | -3.59631 | -0.29767 |
| H  | 0.26156  | -1.23830 | -3.35008 |
| H  | 3.08395  | -4.96832 | -1.87749 |
| H  | 1.48618  | -2.50909 | -5.07284 |
| O  | 3.11318  | -4.54897 | -4.50927 |
| N  | 0.99857  | -2.30637 | -1.72686 |
| N  | 0.77716  | -0.20487 | 1.30524  |
| N  | -1.25288 | 0.26211  | -0.88978 |
| O  | -0.31530 | -3.96714 | 0.57833  |
| O  | -0.68690 | -2.75147 | 0.71676  |
| Cu | 0.07770  | -1.22462 | -0.32254 |

58.  $L^1CuXO_2$   $\eta^1$  triplet, X = 4-oxypyridine

|   |          |          |          |
|---|----------|----------|----------|
| C | -2.83710 | 2.06762  | -0.24010 |
| C | 1.99585  | -0.75751 | 1.93629  |
| C | 1.77887  | -1.64660 | 3.02525  |
| C | 2.88770  | -2.23597 | 3.64504  |
| C | 4.18414  | -1.99554 | 3.20557  |
| C | 4.38701  | -1.15768 | 2.11225  |
| C | 3.31781  | -0.53661 | 1.46009  |
| C | 0.38135  | -1.99306 | 3.54150  |
| C | 0.11179  | -1.38518 | 4.93348  |
| C | 0.14562  | -3.51636 | 3.59651  |
| C | 3.57589  | 0.39135  | 0.27523  |
| C | 4.67838  | -0.11260 | -0.67167 |
| C | 3.88598  | 1.82526  | 0.75001  |
| C | -1.90961 | 0.24011  | -2.15371 |
| C | -2.89526 | -0.75316 | -2.38360 |

|   |          |          |          |
|---|----------|----------|----------|
| C | -3.49675 | -0.83360 | -3.64431 |
| C | -3.13494 | 0.02310  | -4.67894 |
| C | -2.14862 | 0.98020  | -4.45570 |
| C | -1.52571 | 1.11072  | -3.20972 |
| C | -3.30272 | -1.74114 | -1.29404 |
| C | -3.05800 | -3.19834 | -1.73290 |
| C | -4.76766 | -1.55104 | -0.85616 |
| C | -0.42210 | 2.15314  | -3.02501 |
| C | -0.86391 | 3.56391  | -3.45726 |
| C | 0.86809  | 1.74194  | -3.76146 |
| C | 2.29950  | -2.92254 | -1.58069 |
| C | 0.92351  | -2.11729 | -3.25037 |
| C | 2.93956  | -3.77400 | -2.44456 |
| C | 1.50230  | -2.93181 | -4.19011 |
| C | 2.58855  | -3.84060 | -3.85591 |
| C | 0.73395  | 1.57622  | 3.03883  |
| C | 0.24463  | 0.88117  | 1.76781  |
| C | -0.91910 | 1.45947  | 1.21334  |
| C | -1.60405 | 1.20330  | 0.00519  |
| H | 1.03112  | 2.60386  | 2.80072  |
| H | 1.58578  | 1.07115  | 3.49373  |
| H | -0.07119 | 1.64024  | 3.77808  |
| H | -1.34114 | 2.26044  | 1.81154  |
| H | -3.08598 | 2.66051  | 0.64255  |
| H | -3.70147 | 1.45044  | -0.50232 |
| H | -2.67832 | 2.75153  | -1.08009 |
| H | 2.72697  | -2.90673 | 4.48557  |
| H | 5.02932  | -2.46672 | 3.70110  |
| H | 5.39821  | -0.98528 | 1.75526  |
| H | -0.34479 | -1.57330 | 2.84027  |
| H | -0.91080 | -1.61010 | 5.26027  |
| H | 0.23676  | -0.29963 | 4.93960  |
| H | 0.79695  | -1.80215 | 5.68166  |
| H | -0.89457 | -3.72805 | 3.87239  |
| H | 0.78575  | -3.99669 | 4.34602  |
| H | 0.34187  | -3.98942 | 2.63292  |
| H | 2.64713  | 0.43236  | -0.30387 |
| H | 4.72712  | 0.52851  | -1.55873 |
| H | 4.47965  | -1.13288 | -1.01052 |
| H | 5.67033  | -0.09097 | -0.20348 |
| H | 4.02853  | 2.49543  | -0.10651 |
| H | 4.80332  | 1.84680  | 1.35154  |
| H | 3.07454  | 2.22896  | 1.36229  |
| H | -4.25855 | -1.58982 | -3.81942 |
| H | -3.60883 | -0.06040 | -5.65384 |
| H | -1.85143 | 1.63839  | -5.26892 |
| H | -2.66699 | -1.54905 | -0.42648 |
| H | -3.26637 | -3.88904 | -0.90745 |
| H | -2.02111 | -3.34871 | -2.04360 |
| H | -3.70566 | -3.47872 | -2.57244 |
| H | -5.02048 | -2.24728 | -0.04727 |
| H | -5.46153 | -1.74004 | -1.68394 |
| H | -4.95404 | -0.53472 | -0.49346 |
| H | -0.18238 | 2.19479  | -1.95982 |
| H | -0.07978 | 4.29571  | -3.22957 |
| H | -1.77760 | 3.87883  | -2.94170 |
| H | -1.05788 | 3.61796  | -4.53487 |
| H | 1.66159  | 2.47996  | -3.59020 |
| H | 0.70260  | 1.67252  | -4.84317 |
| H | 1.22857  | 0.76963  | -3.41579 |
| H | 2.58108  | -2.89431 | -0.52959 |
| H | 0.10586  | -1.45601 | -3.52519 |
| H | 3.73333  | -4.42238 | -2.08238 |
| H | 1.14902  | -2.91201 | -5.21783 |

|    |          |          |          |
|----|----------|----------|----------|
| O  | 3.15154  | -4.59133 | -4.67906 |
| N  | 1.29691  | -2.06700 | -1.93738 |
| N  | 0.90267  | -0.15161 | 1.25485  |
| N  | -1.23566 | 0.30766  | -0.90451 |
| O  | -0.21328 | -3.90812 | 0.25234  |
| O  | -0.63012 | -2.74727 | 0.37655  |
| Cu | 0.40532  | -0.94951 | -0.55624 |

59.  $L^1CuXO_2$   $\eta^2$  singlet, X = 4-oxypyridine

|   |          |          |          |
|---|----------|----------|----------|
| C | 1.45179  | 0.96551  | -2.47066 |
| C | 2.59814  | 1.74304  | -3.10511 |
| C | -2.55129 | -0.85267 | -1.51709 |
| C | -3.06609 | -2.05981 | -2.06079 |
| C | -4.35627 | -2.46611 | -1.69544 |
| C | -5.12816 | -1.72948 | -0.80432 |
| C | -4.59955 | -0.57068 | -0.24284 |
| C | -3.31689 | -0.12038 | -0.56996 |
| C | -2.25813 | -2.93009 | -3.02234 |
| C | -2.90144 | -2.98085 | -4.42301 |
| C | -2.06965 | -4.35654 | -2.47097 |
| C | -2.76508 | 1.14718  | 0.07752  |
| C | -3.00728 | 1.19854  | 1.59675  |
| C | -3.32958 | 2.41073  | -0.60159 |
| C | 2.71796  | 0.88150  | -0.42781 |
| C | 3.84239  | 0.04603  | -0.19417 |
| C | 4.85052  | 0.49512  | 0.66648  |
| C | 4.77639  | 1.73544  | 1.29181  |
| C | 3.66551  | 2.54487  | 1.07117  |
| C | 2.62426  | 2.14087  | 0.22989  |
| C | 3.97658  | -1.33189 | -0.83893 |
| C | 3.95165  | -2.45491 | 0.21770  |
| C | 5.23925  | -1.43908 | -1.71591 |
| C | 1.39442  | 3.03864  | 0.08866  |
| C | 1.74098  | 4.43448  | -0.46576 |
| C | 0.64465  | 3.16818  | 1.42927  |
| C | -0.90235 | -2.03513 | 1.60211  |
| C | 0.86018  | -0.65816 | 2.22367  |
| C | -1.24682 | -2.26273 | 2.90887  |
| C | 0.58955  | -0.82969 | 3.55672  |
| C | -0.51550 | -1.66015 | 4.01563  |
| C | -2.09398 | 0.69834  | -3.89478 |
| C | -0.99963 | 0.32566  | -2.89707 |
| C | 0.28708  | 0.85820  | -3.22989 |
| H | -2.14206 | 1.78564  | -4.01784 |
| H | -3.07606 | 0.33822  | -3.58778 |
| H | -1.86026 | 0.27411  | -4.87803 |
| H | 0.32960  | 1.34223  | -4.20015 |
| H | 2.33076  | 2.08871  | -4.10563 |
| H | 3.48671  | 1.10541  | -3.18060 |
| H | 2.88715  | 2.60955  | -2.50451 |
| H | -4.75894 | -3.38403 | -2.11729 |
| H | -6.12716 | -2.06409 | -0.53510 |
| H | -5.19225 | -0.00751 | 0.47294  |
| H | -1.26065 | -2.49449 | -3.11763 |
| H | -2.28003 | -3.56750 | -5.11059 |
| H | -3.02392 | -1.98042 | -4.85012 |
| H | -3.89277 | -3.45024 | -4.39185 |
| H | -1.46232 | -4.95334 | -3.16197 |
| H | -3.02787 | -4.87406 | -2.33947 |
| H | -1.55117 | -4.32823 | -1.51041 |
| H | -1.68286 | 1.13893  | -0.08017 |
| H | -2.48697 | 2.06074  | 2.02957  |
| H | -2.63466 | 0.29712  | 2.09082  |

|    |          |          |          |
|----|----------|----------|----------|
| H  | -4.07098 | 1.30743  | 1.84154  |
| H  | -2.89786 | 3.31716  | -0.15952 |
| H  | -4.41863 | 2.46497  | -0.48091 |
| H  | -3.11328 | 2.42294  | -1.67398 |
| H  | 5.70988  | -0.14500 | 0.85108  |
| H  | 5.57146  | 2.06411  | 1.95647  |
| H  | 3.59592  | 3.50428  | 1.57833  |
| H  | 3.11631  | -1.49021 | -1.49339 |
| H  | 3.98015  | -3.43521 | -0.27083 |
| H  | 3.04095  | -2.41239 | 0.82163  |
| H  | 4.81144  | -2.39030 | 0.89638  |
| H  | 5.26972  | -2.41309 | -2.21808 |
| H  | 6.15703  | -1.34341 | -1.12298 |
| H  | 5.26017  | -0.66168 | -2.48757 |
| H  | 0.71141  | 2.56329  | -0.61853 |
| H  | 0.82764  | 5.02322  | -0.61176 |
| H  | 2.25793  | 4.37554  | -1.42930 |
| H  | 2.38535  | 4.99465  | 0.22178  |
| H  | -0.26183 | 3.77270  | 1.30313  |
| H  | 1.26688  | 3.65679  | 2.18876  |
| H  | 0.34995  | 2.18980  | 1.81777  |
| H  | -1.45757 | -2.49432 | 0.79008  |
| H  | 1.69052  | -0.03447 | 1.90359  |
| H  | -2.09187 | -2.90515 | 3.14144  |
| H  | 1.20397  | -0.33320 | 4.30297  |
| O  | -0.80159 | -1.83609 | 5.22001  |
| N  | -1.23919 | -0.40952 | -1.83840 |
| N  | 1.65063  | 0.43604  | -1.24973 |
| N  | 0.13000  | -1.22489 | 1.22275  |
| O  | 1.02623  | -2.53984 | -2.11112 |
| O  | 0.51223  | -3.00250 | -0.97175 |
| Cu | 0.60512  | -1.15013 | -0.70066 |

60. L<sup>1</sup>CuX, X = 2,3-dihydro-1*H*-imidazol-2-ylidene

|   |          |          |          |
|---|----------|----------|----------|
| C | -4.48065 | -5.58834 | -0.56003 |
| C | -4.02346 | -3.35369 | -0.35612 |
| C | -3.13112 | -5.45983 | -0.48079 |
| C | -1.00915 | -0.61301 | 1.36954  |
| C | 0.30562  | -1.09296 | 1.38831  |
| C | 1.05016  | -1.22248 | 0.21921  |
| C | 0.47290  | -0.86804 | -0.99742 |
| C | -0.83748 | -0.38195 | -1.07122 |
| C | -1.80407 | -0.54862 | 2.67131  |
| C | -1.09183 | 0.27176  | 3.76149  |
| C | -2.13508 | -1.96478 | 3.18454  |
| C | -1.44414 | -0.05585 | -2.43463 |
| C | -1.71358 | -1.34262 | -3.23979 |
| C | -0.58166 | 0.92568  | -3.24873 |
| C | -7.11509 | -1.09359 | -0.34156 |
| C | -7.74233 | -1.66007 | 0.80072  |
| C | -8.82403 | -2.52954 | 0.61861  |
| C | -9.29592 | -2.84854 | -0.65274 |
| C | -8.67646 | -2.29009 | -1.76839 |
| C | -7.59152 | -1.41500 | -1.64149 |
| C | -7.22813 | -1.38184 | 2.21161  |
| C | -6.57182 | -2.63601 | 2.82291  |
| C | -8.32658 | -0.83552 | 3.14177  |
| C | -6.91391 | -0.86540 | -2.89564 |
| C | -7.89772 | -0.13033 | -3.82404 |
| C | -6.17191 | -1.97970 | -3.66077 |
| C | -2.35981 | 2.46572  | 0.35083  |
| C | -3.38592 | 1.35875  | 0.16152  |
| C | -4.74094 | 1.75630  | 0.10321  |

|    |           |          |          |
|----|-----------|----------|----------|
| C  | -5.91402  | 0.98464  | -0.05688 |
| C  | -7.23334  | 1.74085  | -0.07322 |
| C  | -1.59230  | -0.25181 | 0.12572  |
| H  | -1.97130  | -3.67412 | -0.27677 |
| H  | -5.10028  | -6.46488 | -0.66198 |
| H  | -5.97392  | -4.05607 | -0.50971 |
| H  | -2.34945  | -6.20236 | -0.50080 |
| H  | -2.83367  | 3.44812  | 0.39033  |
| H  | -1.62931  | 2.46429  | -0.46516 |
| H  | -1.79278  | 2.31736  | 1.27642  |
| H  | -4.90686  | 2.82257  | 0.19994  |
| H  | -7.08031  | 2.81629  | 0.03322  |
| H  | -7.88668  | 1.40167  | 0.73806  |
| H  | -7.77481  | 1.55789  | -1.00773 |
| H  | 0.75403   | -1.37553 | 2.33781  |
| H  | 2.07024   | -1.59574 | 0.25582  |
| H  | 1.05206   | -0.97334 | -1.91165 |
| H  | -2.75464  | -0.05536 | 2.45169  |
| H  | -1.72636  | 0.35856  | 4.65062  |
| H  | -0.85813  | 1.28320  | 3.41366  |
| H  | -0.15126  | -0.19497 | 4.07567  |
| H  | -2.73833  | -1.91726 | 4.09861  |
| H  | -1.22248  | -2.52767 | 3.41501  |
| H  | -2.70173  | -2.52834 | 2.43623  |
| H  | -2.41177  | 0.42075  | -2.25755 |
| H  | -2.18217  | -1.10921 | -4.20286 |
| H  | -2.38533  | -2.01140 | -2.69199 |
| H  | -0.78321  | -1.88639 | -3.44368 |
| H  | -1.09003  | 1.19859  | -4.18032 |
| H  | 0.38687   | 0.49119  | -3.52103 |
| H  | -0.38542  | 1.84606  | -2.68921 |
| H  | -9.30366  | -2.96881 | 1.49005  |
| H  | -10.13847 | -3.52433 | -0.77272 |
| H  | -9.04186  | -2.54134 | -2.76123 |
| H  | -6.44937  | -0.61877 | 2.13223  |
| H  | -6.17687  | -2.41951 | 3.82228  |
| H  | -5.74075  | -2.98568 | 2.20219  |
| H  | -7.29276  | -3.45675 | 2.92001  |
| H  | -7.90468  | -0.57288 | 4.11850  |
| H  | -9.11853  | -1.57304 | 3.31481  |
| H  | -8.79581  | 0.06138  | 2.72464  |
| H  | -6.16127  | -0.14222 | -2.57068 |
| H  | -7.36380  | 0.31536  | -4.67088 |
| H  | -8.42286  | 0.67223  | -3.29605 |
| H  | -8.65539  | -0.80727 | -4.23490 |
| H  | -5.66013  | -1.57288 | -4.54056 |
| H  | -6.86556  | -2.75547 | -4.00727 |
| H  | -5.41933  | -2.45651 | -3.02505 |
| N  | -2.88357  | -4.10050 | -0.35788 |
| N  | -4.99343  | -4.30228 | -0.48264 |
| N  | -2.96954  | 0.09929  | 0.05908  |
| N  | -5.92162  | -0.33767 | -0.19189 |
| Cu | -4.23674  | -1.42840 | -0.18834 |

61.  $L^1CuXO_2$   $\eta^1$  singlet, X = 2,3-dihydro-1*H*-imidazol-2-ylidene

|   |         |          |          |
|---|---------|----------|----------|
| C | 1.12627 | -4.08517 | -0.72399 |
| C | 0.78802 | -1.89539 | -0.28365 |
| C | 2.25451 | -3.42128 | -1.09949 |
| C | 3.18149 | 0.39797  | 1.46108  |
| C | 4.49511 | -0.04672 | 1.27437  |
| C | 5.11383 | 0.01940  | 0.02879  |
| C | 4.42168 | 0.55746  | -1.05524 |
| C | 3.10593 | 1.02448  | -0.92282 |



|   |          |          |          |
|---|----------|----------|----------|
| C | 2.53919  | 0.31387  | 2.84453  |
| C | 3.35633  | 1.07792  | 3.90402  |
| C | 2.30615  | -1.14643 | 3.28043  |
| C | 2.38809  | 1.61122  | -2.14187 |
| C | 2.02899  | 0.52994  | -3.18160 |
| C | 3.20132  | 2.73823  | -2.80732 |
| C | -3.11756 | 0.24658  | 0.20142  |
| C | -3.91136 | 0.01476  | 1.35496  |
| C | -5.16942 | -0.56828 | 1.18545  |
| C | -5.63409 | -0.94845 | -0.07082 |
| C | -4.82531 | -0.76455 | -1.18588 |
| C | -3.56046 | -0.17417 | -1.07562 |
| C | -3.43059 | 0.36142  | 2.76474  |
| C | -3.52710 | -0.85027 | 3.71297  |
| C | -4.19184 | 1.55799  | 3.37211  |
| C | -2.70432 | -0.00475 | -2.32865 |
| C | -3.39210 | 0.86529  | -3.39783 |
| C | -2.30602 | -1.37242 | -2.91708 |
| C | 1.78546  | 3.59647  | 0.82186  |
| C | 0.72702  | 2.52277  | 0.62097  |
| C | -0.60449 | 2.96089  | 0.57489  |
| C | -1.78396 | 2.21452  | 0.37844  |
| C | -3.04223 | 3.03775  | 0.14359  |
| C | 2.47542  | 0.92237  | 0.34878  |
| H | 2.68881  | -1.33520 | -0.94406 |
| H | 0.87984  | -5.13411 | -0.77034 |
| H | -0.67622 | -3.26573 | 0.22885  |
| H | 3.17692  | -3.77391 | -1.53216 |
| H | 1.32623  | 4.56180  | 1.04178  |
| H | 2.41296  | 3.71018  | -0.06751 |
| H | 2.45331  | 3.33175  | 1.64760  |
| H | -0.74451 | 4.03102  | 0.66114  |
| H | -2.89587 | 4.07275  | 0.45767  |
| H | -3.91472 | 2.62830  | 0.65146  |
| H | -3.27376 | 3.04022  | -0.92821 |
| H | 5.04174  | -0.45670 | 2.11941  |
| H | 6.13331  | -0.33505 | -0.09597 |
| H | 4.91430  | 0.62337  | -2.02191 |
| H | 1.55862  | 0.79338  | 2.77868  |
| H | 2.82721  | 1.07870  | 4.86321  |
| H | 3.52312  | 2.11976  | 3.61041  |
| H | 4.33754  | 0.61975  | 4.07147  |
| H | 1.84896  | -1.17835 | 4.27582  |
| H | 3.24911  | -1.70382 | 3.32837  |
| H | 1.63612  | -1.66611 | 2.58929  |
| H | 1.44605  | 2.04349  | -1.79684 |
| H | 1.52915  | 0.98198  | -4.04560 |
| H | 1.35504  | -0.22214 | -2.76200 |
| H | 2.92577  | 0.01695  | -3.55016 |
| H | 2.61325  | 3.21071  | -3.60151 |
| H | 4.12279  | 2.36114  | -3.26468 |
| H | 3.48362  | 3.51529  | -2.08994 |
| H | -5.79488 | -0.74040 | 2.05701  |
| H | -6.61698 | -1.40011 | -0.17589 |
| H | -5.18133 | -1.08139 | -2.16283 |
| H | -2.37391 | 0.63047  | 2.69133  |
| H | -3.04629 | -0.61578 | 4.67004  |
| H | -3.03573 | -1.72344 | 3.28175  |
| H | -4.56893 | -1.11323 | 3.93024  |
| H | -3.83279 | 1.76141  | 4.38752  |
| H | -5.26631 | 1.35002  | 3.43684  |
| H | -4.06514 | 2.47404  | 2.78831  |
| H | -1.78379 | 0.50739  | -2.03406 |
| H | -2.72764 | 1.01450  | -4.25662 |

S90

|    |          |          |          |
|----|----------|----------|----------|
| H  | -3.65971 | 1.85121  | -3.00402 |
| H  | -4.31067 | 0.39815  | -3.77008 |
| H  | -1.63270 | -1.24453 | -3.77296 |
| H  | -3.18471 | -1.92709 | -3.26520 |
| H  | -1.79836 | -1.98855 | -2.16953 |
| N  | 0.25493  | -3.13372 | -0.23686 |
| N  | 2.01854  | -2.08529 | -0.82373 |
| N  | 1.09868  | 1.25016  | 0.48580  |
| N  | -1.84295 | 0.88662  | 0.32149  |
| O  | -1.19670 | -1.61308 | 1.55595  |
| O  | -1.92668 | -2.58157 | 1.06770  |
| Cu | -0.24374 | -0.29893 | 0.40316  |

62.  $L^1CuXO_2$   $\eta^1$  triplet, X = 2,3-dihydro-1*H*-imidazol-2-ylidene

|   |          |          |          |
|---|----------|----------|----------|
| C | 1.09535  | -4.09316 | -0.77351 |
| C | 0.76080  | -1.90523 | -0.26545 |
| C | 2.18912  | -3.40669 | -1.20026 |
| C | 3.18799  | 0.35741  | 1.40900  |
| C | 4.48859  | -0.11065 | 1.18897  |
| C | 5.08900  | -0.02911 | -0.06405 |
| C | 4.39014  | 0.55128  | -1.12157 |
| C | 3.08892  | 1.04580  | -0.95401 |
| C | 2.57167  | 0.24272  | 2.80124  |
| C | 3.37970  | 1.03516  | 3.84761  |
| C | 2.40857  | -1.22591 | 3.23933  |
| C | 2.36508  | 1.67543  | -2.14711 |
| C | 1.92706  | 0.61917  | -3.18175 |
| C | 3.20874  | 2.77092  | -2.82668 |
| C | -3.12361 | 0.24644  | 0.17944  |
| C | -3.93003 | -0.01166 | 1.32065  |
| C | -5.14555 | -0.67920 | 1.13693  |
| C | -5.56153 | -1.10715 | -0.12024 |
| C | -4.75178 | -0.87164 | -1.22552 |
| C | -3.53116 | -0.19780 | -1.10227 |
| C | -3.51888 | 0.41269  | 2.73269  |
| C | -3.68415 | -0.72373 | 3.76246  |
| C | -4.29764 | 1.65488  | 3.21500  |
| C | -2.67974 | 0.03674  | -2.34861 |
| C | -3.41342 | 0.89351  | -3.39830 |
| C | -2.21137 | -1.29360 | -2.97013 |
| C | 1.77724  | 3.61400  | 0.84096  |
| C | 0.72324  | 2.53888  | 0.62273  |
| C | -0.61068 | 2.97306  | 0.56405  |
| C | -1.79373 | 2.23072  | 0.34858  |
| C | -3.03418 | 3.06338  | 0.05756  |
| C | 2.47251  | 0.92890  | 0.32512  |
| H | 2.60442  | -1.31632 | -1.03937 |
| H | 0.85866  | -5.14422 | -0.81665 |
| H | -0.62330 | -3.32416 | 0.29509  |
| H | 3.08988  | -3.74072 | -1.68934 |
| H | 1.31608  | 4.57629  | 1.07025  |
| H | 2.41010  | 3.73953  | -0.04348 |
| H | 2.44119  | 3.33992  | 1.66703  |
| H | -0.75102 | 4.04413  | 0.64529  |
| H | -2.95195 | 4.05672  | 0.50403  |
| H | -3.95264 | 2.58996  | 0.40290  |
| H | -3.12970 | 3.19575  | -1.02750 |
| H | 5.03929  | -0.55284 | 2.01528  |
| H | 6.09747  | -0.40445 | -0.21502 |
| H | 4.86645  | 0.62731  | -2.09570 |
| H | 1.57198  | 0.68320  | 2.75241  |
| H | 2.88034  | 1.00017  | 4.82225  |
| H | 3.48746  | 2.08666  | 3.56156  |

|    |          |          |          |
|----|----------|----------|----------|
| H  | 4.38691  | 0.62283  | 3.97812  |
| H  | 1.93936  | -1.27919 | 4.22798  |
| H  | 3.37702  | -1.73597 | 3.30290  |
| H  | 1.77793  | -1.78104 | 2.53940  |
| H  | 1.45345  | 2.14629  | -1.77269 |
| H  | 1.42229  | 1.09798  | -4.02831 |
| H  | 1.23166  | -0.10391 | -2.74559 |
| H  | 2.78859  | 0.06879  | -3.57971 |
| H  | 2.61838  | 3.28060  | -3.59591 |
| H  | 4.09652  | 2.35803  | -3.31844 |
| H  | 3.54937  | 3.52378  | -2.10867 |
| H  | -5.77569 | -0.87635 | 1.99964  |
| H  | -6.50897 | -1.62690 | -0.23528 |
| H  | -5.07444 | -1.21278 | -2.20602 |
| H  | -2.45747 | 0.67216  | 2.69828  |
| H  | -3.23442 | -0.42722 | 4.71710  |
| H  | -3.20191 | -1.64420 | 3.42929  |
| H  | -4.74019 | -0.94208 | 3.96002  |
| H  | -3.98885 | 1.92705  | 4.23097  |
| H  | -5.37564 | 1.45590  | 3.23759  |
| H  | -4.13313 | 2.52526  | 2.57468  |
| H  | -1.78648 | 0.58750  | -2.04053 |
| H  | -2.75627 | 1.10664  | -4.24937 |
| H  | -3.74243 | 1.84897  | -2.97725 |
| H  | -4.30092 | 0.38182  | -3.78762 |
| H  | -1.56033 | -1.10982 | -3.83303 |
| H  | -3.06043 | -1.89347 | -3.31677 |
| H  | -1.65279 | -1.89318 | -2.24525 |
| N  | 0.24814  | -3.15387 | -0.21720 |
| N  | 1.95731  | -2.08003 | -0.87842 |
| N  | 1.10302  | 1.26933  | 0.47949  |
| N  | -1.85835 | 0.90349  | 0.32787  |
| O  | -1.21548 | -1.51919 | 1.86792  |
| O  | -1.61443 | -2.72426 | 1.71764  |
| Cu | -0.24275 | -0.29161 | 0.42229  |

63.  $L^1CuXO_2$   $\eta^2$  singlet, X = 2,3-dihydro-1*H*-imidazol-2-ylidene

|   |          |          |          |
|---|----------|----------|----------|
| C | 1.09028  | -3.90935 | -0.95186 |
| C | 3.98908  | 1.50611  | 2.98755  |
| C | 3.03310  | -0.83009 | 2.73259  |
| C | 2.37144  | 1.73010  | -2.85804 |
| C | 2.01432  | 0.67291  | -3.92215 |
| C | 3.09978  | 2.91312  | -3.52856 |
| C | -2.82876 | 0.47196  | -0.58079 |
| C | -3.75070 | 0.17470  | 0.45390  |
| C | -4.92988 | -0.49941 | 0.11521  |
| C | -5.19429 | -0.89923 | -1.19106 |
| C | -4.26327 | -0.63695 | -2.19058 |
| C | 0.91618  | -1.66516 | -0.63237 |
| C | -3.07129 | 0.03985  | -1.91139 |
| C | -3.50565 | 0.58393  | 1.90363  |
| C | -3.73512 | -0.58459 | 2.88066  |
| C | -4.37648 | 1.79017  | 2.30967  |
| C | -2.07914 | 0.29649  | -3.04481 |
| C | -2.64547 | 1.27160  | -4.09583 |
| C | -1.62773 | -1.01668 | -3.71235 |
| C | 2.05744  | 3.83182  | 0.12207  |
| C | 0.98455  | 2.76541  | -0.02811 |
| C | -0.33745 | 3.21456  | -0.08898 |
| C | 2.08483  | -3.31889 | -1.66645 |
| C | -1.53125 | 2.47963  | -0.31325 |
| C | -2.74433 | 3.34125  | -0.64131 |
| C | 2.70252  | 1.09810  | -0.35740 |

|    |          |          |          |
|----|----------|----------|----------|
| C  | 3.53036  | 0.59163  | 0.67872  |
| C  | 4.80063  | 0.10203  | 0.35120  |
| C  | 5.26882  | 0.11301  | -0.95863 |
| C  | 4.46590  | 0.63849  | -1.96881 |
| C  | 3.18483  | 1.14129  | -1.69963 |
| C  | 3.08674  | 0.58962  | 2.13784  |
| H  | 2.59188  | -1.24433 | -1.79372 |
| H  | 0.82004  | -4.94731 | -0.84343 |
| H  | -0.37014 | -2.91712 | 0.32374  |
| H  | 2.85268  | -3.74194 | -2.29420 |
| H  | 1.62912  | 4.83364  | 0.06573  |
| H  | 2.83389  | 3.73942  | -0.63966 |
| H  | 2.55489  | 3.72343  | 1.09218  |
| H  | -0.46821 | 4.28910  | -0.04055 |
| H  | -2.61232 | 3.79096  | -1.63212 |
| H  | -2.82547 | 4.16456  | 0.07466  |
| H  | -3.67677 | 2.77918  | -0.64360 |
| H  | 5.43513  | -0.29236 | 1.14026  |
| H  | 6.25781  | -0.27220 | -1.19174 |
| H  | 4.84434  | 0.66936  | -2.98771 |
| H  | 2.07146  | 0.99141  | 2.17263  |
| H  | 3.61210  | 1.56543  | 4.01417  |
| H  | 4.02944  | 2.52306  | 2.58328  |
| H  | 5.01741  | 1.12895  | 3.03132  |
| H  | 2.73792  | -0.78312 | 3.78627  |
| H  | 4.00778  | -1.33007 | 2.68174  |
| H  | 2.29145  | -1.44297 | 2.21543  |
| H  | 1.43093  | 2.10592  | -2.45020 |
| H  | 1.43695  | 1.12978  | -4.73352 |
| H  | 1.40992  | -0.13573 | -3.50169 |
| H  | 2.91230  | 0.23083  | -4.37020 |
| H  | 2.46310  | 3.36400  | -4.29779 |
| H  | 4.02644  | 2.58948  | -4.01556 |
| H  | 3.35977  | 3.69609  | -2.81064 |
| H  | -5.65501 | -0.71795 | 0.89388  |
| H  | -6.11979 | -1.41729 | -1.42799 |
| H  | -4.46684 | -0.95845 | -3.20907 |
| H  | -2.45542 | 0.87156  | 1.99105  |
| H  | -3.43412 | -0.29053 | 3.89169  |
| H  | -3.14348 | -1.45562 | 2.59246  |
| H  | -4.78965 | -0.88127 | 2.92631  |
| H  | -4.16934 | 2.07823  | 3.34657  |
| H  | -5.44375 | 1.54898  | 2.23748  |
| H  | -4.19130 | 2.66265  | 1.67691  |
| H  | -1.19202 | 0.76212  | -2.60681 |
| H  | -1.89838 | 1.48514  | -4.86930 |
| H  | -2.94113 | 2.22196  | -3.64126 |
| H  | -3.52821 | 0.85464  | -4.59415 |
| H  | -0.86536 | -0.81750 | -4.47419 |
| H  | -2.46060 | -1.52881 | -4.20698 |
| H  | -1.20070 | -1.70610 | -2.97735 |
| N  | 0.39997  | -2.87822 | -0.34044 |
| N  | 1.95174  | -1.95456 | -1.45725 |
| N  | 1.35861  | 1.47878  | -0.07670 |
| N  | -1.61246 | 1.16192  | -0.28716 |
| O  | -1.00689 | -1.15489 | 1.23522  |
| O  | -0.32061 | -0.72348 | 2.27864  |
| Cu | 0.03364  | 0.02744  | 0.14758  |

64. L<sup>1</sup>CuX, X = methyl-2,3-dihydro-1*H*-imidazol-2-ylidene

|   |          |          |          |
|---|----------|----------|----------|
| C | -0.08255 | -1.84372 | -0.36819 |
| C | 0.31871  | -4.07809 | -0.56735 |
| C | -1.02477 | -3.90411 | -0.66887 |
| C | 3.17552  | 1.10464  | 1.35102  |
| C | 4.52194  | 0.72229  | 1.35989  |
| C | 5.26358  | 0.64785  | 0.18382  |
| C | 4.65300  | 0.95828  | -1.02850 |
| C | 3.30941  | 1.34498  | -1.09186 |
| C | 2.38441  | 1.12966  | 2.65813  |
| C | 3.09301  | 1.91954  | 3.77292  |
| C | 2.05301  | -0.30064 | 3.12855  |
| C | 2.66505  | 1.62718  | -2.44700 |
| C | 2.44909  | 0.31911  | -3.23427 |
| C | 3.45907  | 2.64446  | -3.28527 |
| C | -2.94814 | 0.38780  | -0.32961 |
| C | -3.57668 | -0.20975 | 0.79889  |
| C | -4.62633 | -1.11326 | 0.59166  |
| C | -5.06687 | -1.43726 | -0.68996 |
| C | -4.45227 | -0.84461 | -1.79112 |
| C | -3.39914 | 0.06488  | -1.64007 |
| C | -3.10696 | 0.08618  | 2.22266  |
| C | -2.43149 | -1.14396 | 2.86168  |
| C | -4.24998 | 0.60420  | 3.11554  |
| C | -2.73263 | 0.65891  | -2.87965 |
| C | -3.73917 | 1.38581  | -3.79041 |
| C | -1.95832 | -0.41240 | -3.67389 |
| C | 1.69376  | 4.07428  | 0.33989  |
| C | 0.70241  | 2.93238  | 0.16812  |
| C | -0.66183 | 3.29164  | 0.13335  |
| C | -1.81200 | 2.48664  | -0.02083 |
| C | -3.15192 | 3.20718  | -0.02493 |
| C | 2.55853  | 1.41494  | 0.11015  |
| C | 2.30590  | -2.57397 | -0.26540 |
| H | -1.82225 | -4.61635 | -0.80881 |
| H | -2.14125 | -2.08619 | -0.57037 |
| H | 0.91926  | -4.97319 | -0.60630 |
| H | 2.46222  | -1.51680 | -0.05786 |
| H | 2.72145  | -3.16947 | 0.55242  |
| H | 2.81529  | -2.83732 | -1.19666 |
| H | 1.18257  | 5.03511  | 0.42014  |
| H | 2.38792  | 4.12030  | -0.50622 |
| H | 2.30637  | 3.93133  | 1.23627  |
| H | -0.85684 | 4.35238  | 0.23500  |
| H | -3.02818 | 4.28375  | 0.10625  |
| H | -3.79811 | 2.83251  | 0.77627  |
| H | -3.68576 | 3.03237  | -0.96529 |
| H | 4.99893  | 0.47560  | 2.30519  |
| H | 6.30872  | 0.35071  | 0.21172  |
| H | 5.23260  | 0.89600  | -1.94635 |
| H | 1.43233  | 1.62716  | 2.45622  |
| H | 2.44755  | 1.99425  | 4.65529  |
| H | 3.34082  | 2.93590  | 3.44961  |
| H | 4.02397  | 1.43724  | 4.09145  |
| H | 1.46393  | -0.28040 | 4.05295  |
| H | 2.96652  | -0.87472 | 3.32491  |
| H | 1.47091  | -0.83365 | 2.36974  |
| H | 1.67708  | 2.05488  | -2.25755 |
| H | 1.95733  | 0.51751  | -4.19387 |
| H | 1.81846  | -0.37517 | -2.66909 |
| H | 3.40350  | -0.17947 | -3.44282 |
| H | 2.91721  | 2.88398  | -4.20710 |
| H | 4.44254  | 2.25882  | -3.57666 |
| H | 3.61955  | 3.57815  | -2.73619 |

|    |          |          |          |
|----|----------|----------|----------|
| H  | -5.10451 | -1.57542 | 1.45206  |
| H  | -5.88272 | -2.14154 | -0.82862 |
| H  | -4.79372 | -1.09855 | -2.79156 |
| H  | -2.35003 | 0.87246  | 2.15932  |
| H  | -2.07547 | -0.90870 | 3.87137  |
| H  | -1.57195 | -1.47141 | 2.26880  |
| H  | -3.12900 | -1.98645 | 2.94254  |
| H  | -3.86729 | 0.88160  | 4.10420  |
| H  | -5.02588 | -0.15544 | 3.26529  |
| H  | -4.73097 | 1.48598  | 2.68002  |
| H  | -2.00149 | 1.39533  | -2.53655 |
| H  | -3.21847 | 1.87040  | -4.62402 |
| H  | -4.29218 | 2.15680  | -3.24429 |
| H  | -4.47285 | 0.69447  | -4.22033 |
| H  | -1.46733 | 0.03377  | -4.54645 |
| H  | -2.62690 | -1.20241 | -4.03682 |
| H  | -1.18573 | -0.87965 | -3.05590 |
| N  | 0.87305  | -2.81797 | -0.38383 |
| N  | -1.23840 | -2.54471 | -0.54488 |
| N  | 1.16094  | 1.68566  | 0.06070  |
| N  | -1.77853 | 1.16627  | -0.16022 |
| Cu | -0.01176 | 0.10268  | -0.16655 |

65.  $L^1CuXO_2$   $\eta^1$  singlet, X = methyl-2,3-dihydro-1*H*-imidazol-2-ylidene

|   |          |          |          |
|---|----------|----------|----------|
| H | -1.08343 | -3.94142 | 0.03096  |
| H | -1.47247 | -2.34099 | -0.62265 |
| H | -1.26274 | -3.72252 | -1.73623 |
| C | 1.47404  | -3.89450 | -1.18167 |
| C | 3.75616  | 1.55255  | 3.49006  |
| C | 3.06498  | -0.84999 | 3.15311  |
| C | 2.97804  | 1.65692  | -2.51427 |
| C | 2.66475  | 0.52372  | -3.51188 |
| C | 3.79845  | 2.76495  | -3.20384 |
| C | -2.61726 | 0.63342  | -0.16880 |
| C | -3.37115 | 0.30691  | 0.99361  |
| C | -4.60145 | -0.33786 | 0.81813  |
| C | -5.07565 | -0.67861 | -0.44513 |
| C | -4.31593 | -0.37434 | -1.57177 |
| C | 1.05433  | -1.73616 | -0.62724 |
| C | -3.08568 | 0.28132  | -1.46030 |
| C | -2.89621 | 0.64556  | 2.40898  |
| C | -3.02517 | -0.54962 | 3.37219  |
| C | -3.64712 | 1.85580  | 3.00594  |
| C | -2.29513 | 0.63247  | -2.72117 |
| C | -3.10612 | 1.52617  | -3.67887 |
| C | -1.78719 | -0.62245 | -3.45691 |
| C | 2.41440  | 3.79609  | 0.41282  |
| C | 1.31941  | 2.75142  | 0.24274  |
| C | 0.00427  | 3.24705  | 0.22014  |
| C | 2.67441  | -3.26981 | -1.07465 |
| C | -1.21715 | 2.56714  | 0.03616  |
| C | -2.43938 | 3.45409  | -0.14769 |
| C | 3.01429  | 1.08899  | 0.00492  |
| C | 3.70281  | 0.59110  | 1.14638  |
| C | 5.01612  | 0.12768  | 0.99061  |
| C | 5.65641  | 0.14498  | -0.24520 |
| C | 4.98124  | 0.64461  | -1.35546 |
| C | 3.66949  | 1.12613  | -1.25779 |
| C | 3.06211  | 0.56023  | 2.53377  |
| H | 3.07102  | -1.23722 | -0.55546 |
| H | 1.22759  | -4.91499 | -1.42810 |
| C | -0.91945 | -3.25904 | -0.80747 |
| H | 3.68031  | -3.63333 | -1.20929 |

|    |          |          |          |
|----|----------|----------|----------|
| H  | 1.98960  | 4.77205  | 0.65539  |
| H  | 3.00568  | 3.90196  | -0.50234 |
| H  | 3.11042  | 3.51190  | 1.20659  |
| H  | -0.08107 | 4.32204  | 0.32169  |
| H  | -2.26674 | 4.44918  | 0.26693  |
| H  | -3.33581 | 3.02774  | 0.30248  |
| H  | -2.64653 | 3.57147  | -1.21834 |
| H  | 5.54675  | -0.25348 | 1.85868  |
| H  | 6.67520  | -0.22085 | -0.34046 |
| H  | 5.48313  | 0.66342  | -2.31926 |
| H  | 2.01941  | 0.87189  | 2.42799  |
| H  | 3.23888  | 1.57324  | 4.45539  |
| H  | 3.76122  | 2.57190  | 3.09161  |
| H  | 4.79725  | 1.26533  | 3.67761  |
| H  | 2.59584  | -0.82381 | 4.14228  |
| H  | 4.08509  | -1.23216 | 3.28137  |
| H  | 2.49487  | -1.55641 | 2.54518  |
| H  | 2.02254  | 2.09134  | -2.21083 |
| H  | 2.16632  | 0.92282  | -4.40254 |
| H  | 2.00664  | -0.22798 | -3.06649 |
| H  | 3.58076  | 0.01955  | -3.84206 |
| H  | 3.23483  | 3.19089  | -4.04115 |
| H  | 4.74232  | 2.38144  | -3.60723 |
| H  | 4.04295  | 3.57903  | -2.51413 |
| H  | -5.19661 | -0.58388 | 1.69312  |
| H  | -6.03301 | -1.18184 | -0.55072 |
| H  | -4.68892 | -0.64299 | -2.55700 |
| H  | -1.83558 | 0.89774  | 2.35224  |
| H  | -2.52283 | -0.31861 | 4.31782  |
| H  | -2.56220 | -1.44660 | 2.95742  |
| H  | -4.07198 | -0.77684 | 3.60663  |
| H  | -3.29457 | 2.05291  | 4.02513  |
| H  | -4.72615 | 1.66696  | 3.05834  |
| H  | -3.49655 | 2.76943  | 2.42541  |
| H  | -1.41394 | 1.19916  | -2.40818 |
| H  | -2.48892 | 1.83514  | -4.53026 |
| H  | -3.46673 | 2.42980  | -3.17742 |
| H  | -3.98033 | 1.00023  | -4.07890 |
| H  | -1.22953 | -0.34122 | -4.35796 |
| H  | -2.61393 | -1.27252 | -3.76590 |
| H  | -1.11707 | -1.20582 | -2.81963 |
| N  | 0.50045  | -2.94369 | -0.90690 |
| N  | 2.38647  | -1.96144 | -0.73650 |
| N  | 1.64448  | 1.46503  | 0.10588  |
| N  | -1.34019 | 1.24796  | -0.04716 |
| O  | -0.68014 | -1.24879 | 1.39289  |
| O  | 0.02556  | -1.12624 | 2.46536  |
| Cu | 0.20399  | -0.02885 | 0.01016  |

66.  $L^1CuXO_2$   $\eta^1$  triplet, X = methyl-2,3-dihydro-1H-imidazol-2-ylidene

|   |          |          |          |
|---|----------|----------|----------|
| H | -1.97458 | -2.35082 | -0.07064 |
| H | -1.95833 | -3.79630 | -1.10475 |
| H | -1.57781 | -3.93570 | 0.63323  |
| C | 0.81893  | -4.04595 | -0.93320 |
| C | 3.48722  | 1.42637  | 3.48745  |
| C | 2.84469  | -0.97899 | 3.04725  |
| C | 2.35788  | 1.61586  | -2.49239 |
| C | 2.02286  | 0.47110  | -3.46997 |
| C | 3.07958  | 2.76286  | -3.22262 |
| C | -3.05742 | 0.49640  | -0.07459 |
| C | -3.93541 | 0.18513  | 1.00033  |
| C | -5.13307 | -0.48410 | 0.71339  |
| C | -5.47279 | -0.85144 | -0.58472 |

|   |          |          |          |
|---|----------|----------|----------|
| C | -4.60053 | -0.55317 | -1.62799 |
| C | 0.53781  | -1.83900 | -0.45662 |
| C | -3.39151 | 0.11275  | -1.39940 |
| C | -3.63564 | 0.56553  | 2.45055  |
| C | -3.76297 | -0.63477 | 3.40954  |
| C | -4.54525 | 1.71092  | 2.94250  |
| C | -2.47839 | 0.44998  | -2.57860 |
| C | -3.10566 | 1.53214  | -3.48059 |
| C | -2.09036 | -0.79277 | -3.40104 |
| C | 1.93748  | 3.78043  | 0.48641  |
| C | 0.86352  | 2.71038  | 0.36173  |
| C | -0.46918 | 3.15412  | 0.39754  |
| C | 2.02652  | -3.44656 | -1.09348 |
| C | -1.68373 | 2.45147  | 0.22879  |
| C | -2.90916 | 3.35093  | 0.11066  |
| C | 2.58683  | 1.07623  | 0.01445  |
| C | 3.35047  | 0.56409  | 1.10041  |
| C | 4.65596  | 0.11838  | 0.86051  |
| C | 5.21468  | 0.14764  | -0.41463 |
| C | 4.45831  | 0.63736  | -1.47814 |
| C | 3.15237  | 1.10853  | -1.29109 |
| C | 2.77931  | 0.46496  | 2.51262  |
| H | 2.53826  | -1.39241 | -0.81566 |
| H | 0.51893  | -5.07443 | -1.05724 |
| C | -1.48078 | -3.30315 | -0.25383 |
| H | 2.98425  | -3.84814 | -1.38317 |
| H | 1.50291  | 4.76756  | 0.65487  |
| H | 2.55590  | 3.82491  | -0.41751 |
| H | 2.61178  | 3.55128  | 1.31799  |
| H | -0.58840 | 4.22735  | 0.50250  |
| H | -3.00885 | 3.97503  | 1.00488  |
| H | -3.83064 | 2.78597  | -0.02399 |
| H | -2.79157 | 4.03026  | -0.74067 |
| H | 5.24277  | -0.26574 | 1.69087  |
| H | 6.22922  | -0.20505 | -0.57844 |
| H | 4.89101  | 0.65642  | -2.47523 |
| H | 1.72535  | 0.74973  | 2.46362  |
| H | 3.02620  | 1.37354  | 4.48028  |
| H | 3.43037  | 2.46466  | 3.14540  |
| H | 4.54817  | 1.17411  | 3.60141  |
| H | 2.35726  | -1.04646 | 4.02519  |
| H | 3.88076  | -1.31659 | 3.16813  |
| H | 2.33805  | -1.67537 | 2.37302  |
| H | 1.41070  | 2.01115  | -2.11793 |
| H | 1.44187  | 0.84709  | -4.31984 |
| H | 1.43454  | -0.30939 | -2.97823 |
| H | 2.93337  | 0.00819  | -3.86918 |
| H | 2.44736  | 3.16241  | -4.02334 |
| H | 4.01748  | 2.42864  | -3.68096 |
| H | 3.31946  | 3.58420  | -2.53944 |
| H | -5.81425 | -0.71696 | 1.52717  |
| H | -6.41122 | -1.36256 | -0.78215 |
| H | -4.86810 | -0.83437 | -2.64298 |
| H | -2.60256 | 0.91684  | 2.49247  |
| H | -3.39542 | -0.36184 | 4.40465  |
| H | -3.18330 | -1.49184 | 3.05989  |
| H | -4.80570 | -0.95247 | 3.52288  |
| H | -4.29226 | 1.98499  | 3.97329  |
| H | -5.59977 | 1.41084  | 2.92793  |
| H | -4.44731 | 2.60612  | 2.32384  |
| H | -1.55306 | 0.86258  | -2.16698 |
| H | -2.41999 | 1.81004  | -4.28957 |
| H | -3.34004 | 2.43684  | -2.91037 |
| H | -4.03662 | 1.17850  | -3.93901 |



Electronic Supplementary Information for Dalton Transactions  
This journal is © The Royal Society of Chemistry 2006

S97

|    |          |          |          |
|----|----------|----------|----------|
| H  | -1.39605 | -0.51798 | -4.20296 |
| H  | -2.96121 | -1.26524 | -3.86868 |
| H  | -1.59649 | -1.54209 | -2.77412 |
| N  | -0.07304 | -3.05369 | -0.54680 |
| N  | 1.82538  | -2.11167 | -0.79765 |
| N  | 1.22904  | 1.44026  | 0.20234  |
| N  | -1.79441 | 1.12950  | 0.14676  |
| O  | -0.90101 | -1.20760 | 1.96216  |
| O  | -0.46610 | -0.63580 | 2.98139  |
| Cu | -0.17142 | -0.05443 | 0.13345  |

67.  $L^1CuXO_2$   $\eta^2$  singlet, X = methyl-2,3-dihydro-1*H*-imidazol-2-ylidene

|   |          |          |          |
|---|----------|----------|----------|
| H | -1.93219 | -2.26902 | 0.67216  |
| H | -2.32081 | -3.23807 | -0.76585 |
| H | -1.62299 | -4.02068 | 0.68282  |
| C | 0.44900  | -3.79353 | -1.18550 |
| C | 3.95588  | 1.25838  | 3.37219  |
| C | 2.87569  | -1.00368 | 2.99622  |
| C | 2.17482  | 1.59857  | -2.49059 |
| C | 1.81326  | 0.50232  | -3.51266 |
| C | 2.84280  | 2.78537  | -3.21386 |
| C | -3.00185 | 0.40405  | -0.22010 |
| C | -3.92997 | 0.06137  | 0.80043  |
| C | -5.08864 | -0.64263 | 0.44687  |
| C | -5.34292 | -1.01868 | -0.86858 |
| C | -4.42257 | -0.69085 | -1.85940 |
| C | 0.44138  | -1.73522 | -0.24992 |
| C | -3.24673 | 0.00770  | -1.56161 |
| C | -3.71969 | 0.46368  | 2.25920  |
| C | -3.82995 | -0.73488 | 3.21995  |
| C | -4.70796 | 1.57035  | 2.68109  |
| C | -2.26941 | 0.33852  | -2.68863 |
| C | -2.84696 | 1.40267  | -3.64242 |
| C | -1.84531 | -0.91627 | -3.47653 |
| C | 1.92857  | 3.70431  | 0.47953  |
| C | 0.84959  | 2.63609  | 0.37829  |
| C | -0.46807 | 3.08083  | 0.36307  |
| C | 1.64854  | -3.22330 | -1.46475 |
| C | -1.68682 | 2.36982  | 0.11918  |
| C | -2.88083 | 3.27501  | -0.16097 |
| C | 2.58609  | 0.99614  | -0.00333 |
| C | 3.44007  | 0.48342  | 1.01223  |
| C | 4.71136  | 0.01830  | 0.65794  |
| C | 5.15965  | 0.05820  | -0.66033 |
| C | 4.32914  | 0.57931  | -1.64971 |
| C | 3.04331  | 1.05314  | -1.35281 |
| C | 3.00719  | 0.44084  | 2.47523  |
| H | 2.35791  | -1.28106 | -0.90896 |
| H | 0.04821  | -4.76014 | -1.44620 |
| C | -1.62391 | -3.11792 | 0.06688  |
| H | 2.49929  | -3.59124 | -2.01507 |
| H | 1.48798  | 4.68565  | 0.66406  |
| H | 2.52285  | 3.76453  | -0.43672 |
| H | 2.62334  | 3.47382  | 1.29385  |
| H | -0.58877 | 4.15485  | 0.45163  |
| H | -3.00999 | 3.98549  | 0.66264  |
| H | -3.80845 | 2.71847  | -0.29207 |
| H | -2.69833 | 3.86708  | -1.06495 |
| H | 5.36419  | -0.37708 | 1.43156  |
| H | 6.15131  | -0.30674 | -0.91372 |
| H | 4.68385  | 0.61849  | -2.67647 |
| H | 2.01556  | 0.89269  | 2.54263  |
| H | 3.57241  | 1.28688  | 4.39788  |
| H | 4.05270  | 2.29084  | 3.01972  |
| H | 4.96154  | 0.82406  | 3.40812  |
| H | 2.54112  | -0.99975 | 4.03882  |
| H | 3.83397  | -1.53525 | 2.95152  |
| H | 2.14016  | -1.57241 | 2.41951  |
| H | 1.23906  | 1.95694  | -2.05475 |
| H | 1.18682  | 0.91571  | -4.31092 |
| H | 1.25951  | -0.31560 | -3.04497 |
| H | 2.70994  | 0.08154  | -3.98286 |
| H | 2.15953  | 3.20901  | -3.95803 |
| H | 3.75247  | 2.47716  | -3.74135 |
| H | 3.11921  | 3.58494  | -2.52042 |

|    |          |          |          |
|----|----------|----------|----------|
| H  | -5.80818 | -0.89496 | 1.22102  |
| H  | -6.25229 | -1.55795 | -1.12053 |
| H  | -4.62315 | -0.97793 | -2.88885 |
| H  | -2.70489 | 0.85597  | 2.35652  |
| H  | -3.61508 | -0.41254 | 4.24477  |
| H  | -3.10786 | -1.51178 | 2.95793  |
| H  | -4.83439 | -1.17457 | 3.21925  |
| H  | -4.51585 | 1.88096  | 3.71463  |
| H  | -5.74539 | 1.21851  | 2.62753  |
| H  | -4.62581 | 2.45537  | 2.04360  |
| H  | -1.36874 | 0.75663  | -2.23076 |
| H  | -2.11336 | 1.67661  | -4.40980 |
| H  | -3.12655 | 2.31138  | -3.10124 |
| H  | -3.74262 | 1.03324  | -4.15505 |
| H  | -1.11048 | -0.65848 | -4.24741 |
| H  | -2.69559 | -1.38947 | -3.98058 |
| H  | -1.39040 | -1.66310 | -2.81710 |
| N  | -0.27477 | -2.86975 | -0.44106 |
| N  | 1.61432  | -1.96999 | -0.88220 |
| N  | 1.24754  | 1.34857  | 0.31889  |
| N  | -1.78227 | 1.06139  | 0.10642  |
| O  | -0.68727 | -1.03689 | 2.31788  |
| O  | -0.41385 | 0.19709  | 2.74316  |
| Cu | 0.01132  | -0.10348 | 0.82778  |

68. L<sup>1</sup>CuX, X = 2-pyridinamine

|   |          |          |          |
|---|----------|----------|----------|
| C | 3.14389  | 2.54958  | -3.58990 |
| C | 2.07164  | -3.10900 | -0.27067 |
| C | -0.17731 | -3.90225 | 0.01012  |
| C | 1.67595  | 4.34073  | -0.09611 |
| C | 0.64510  | 3.22193  | -0.05866 |
| C | -0.71214 | 3.62044  | -0.06298 |
| C | -1.90139 | 2.86350  | -0.03268 |
| C | -3.19927 | 3.65672  | -0.08304 |
| C | 2.44221  | 1.62817  | -0.06002 |
| C | 3.13381  | 1.37725  | 1.15369  |
| C | 4.45140  | 0.90928  | 1.09495  |
| C | 5.09111  | 0.69003  | -0.12219 |
| C | 4.40751  | 0.94215  | -1.30881 |
| C | 3.08851  | 1.41092  | -1.30694 |
| C | 2.45096  | 1.56065  | 2.50745  |
| C | 3.26602  | 2.44839  | 3.46475  |
| C | 2.13326  | 0.20016  | 3.16042  |
| C | 2.36230  | 1.62970  | -2.63418 |
| C | 2.03461  | 0.28906  | -3.32284 |
| C | 1.16257  | -4.17116 | -0.18314 |
| C | -3.21507 | 0.85611  | 0.06567  |
| C | -3.81818 | 0.53673  | 1.31269  |
| C | -4.99263 | -0.22502 | 1.31890  |
| C | -5.57358 | -0.67686 | 0.13716  |
| C | -4.97408 | -0.36666 | -1.08102 |
| C | -3.80290 | 0.39701  | -1.14493 |
| C | -3.19237 | 0.96605  | 2.63821  |
| C | -2.69771 | -0.25184 | 3.44431  |
| C | -4.15161 | 1.82113  | 3.48672  |
| C | -3.15682 | 0.68223  | -2.49970 |
| C | -4.14667 | 1.28151  | -3.51505 |
| C | -2.48688 | -0.58399 | -3.07076 |
| C | 1.57907  | -1.82071 | -0.16720 |
| C | -0.60600 | -2.55916 | 0.11068  |
| H | 1.50245  | -5.19995 | -0.26343 |
| H | -2.60754 | -2.97765 | 0.18486  |
| H | -3.81578 | 3.46131  | 0.80032  |

S100

|    |          |          |          |
|----|----------|----------|----------|
| H  | 3.13242  | -3.27386 | -0.41898 |
| H  | 1.20008  | 5.32284  | -0.10349 |
| H  | 2.31248  | 4.25745  | -0.98331 |
| H  | 2.34176  | 4.28359  | 0.77177  |
| H  | -0.86413 | 4.69214  | -0.10201 |
| H  | -3.00687 | 4.72935  | -0.13924 |
| H  | -2.22871 | -1.31003 | 0.24085  |
| H  | -3.79963 | 3.36732  | -0.95219 |
| H  | 4.98503  | 0.70656  | 2.02015  |
| H  | 6.11427  | 0.32452  | -0.14599 |
| H  | 4.90703  | 0.76510  | -2.25814 |
| H  | 1.49554  | 2.06050  | 2.32686  |
| H  | 2.70503  | 2.62761  | 4.38877  |
| H  | 3.49393  | 3.41994  | 3.01418  |
| H  | 4.21712  | 1.98235  | 3.74584  |
| H  | 1.62103  | 0.34038  | 4.11960  |
| H  | 3.04813  | -0.37378 | 3.34942  |
| H  | 1.48492  | -0.40272 | 2.51717  |
| H  | 1.40933  | 2.11688  | -2.41237 |
| H  | 1.49929  | 0.45834  | -4.26460 |
| H  | 1.40386  | -0.33906 | -2.68666 |
| H  | 2.94684  | -0.27392 | -3.55340 |
| H  | 2.55384  | 2.75294  | -4.49057 |
| H  | 4.08729  | 2.09589  | -3.91398 |
| H  | 3.38295  | 3.50889  | -3.11948 |
| H  | -5.45657 | -0.47489 | 2.26987  |
| H  | -6.48589 | -1.26676 | 0.16475  |
| H  | -5.42545 | -0.72482 | -2.00291 |
| H  | -2.31768 | 1.57831  | 2.40395  |
| H  | -2.19273 | 0.07288  | 4.36133  |
| H  | -1.99407 | -0.85433 | 2.86212  |
| H  | -3.53073 | -0.90237 | 3.73602  |
| H  | -3.65105 | 2.16489  | 4.39879  |
| H  | -5.03798 | 1.25339  | 3.79218  |
| H  | -4.49742 | 2.70413  | 2.93983  |
| H  | -2.36479 | 1.41767  | -2.33621 |
| H  | -3.62472 | 1.55278  | -4.43953 |
| H  | -4.62788 | 2.18319  | -3.12251 |
| H  | -4.93859 | 0.57343  | -3.78389 |
| H  | -1.99707 | -0.36742 | -4.02704 |
| H  | -3.22194 | -1.37934 | -3.24337 |
| H  | -1.72684 | -0.96885 | -2.38332 |
| H  | 2.24422  | -0.96919 | -0.23265 |
| N  | -1.91416 | -2.26634 | 0.35334  |
| H  | -0.90719 | -4.70139 | 0.09302  |
| N  | -1.96023 | 1.53076  | 0.02962  |
| N  | 1.05785  | 1.95924  | -0.02808 |
| N  | 0.26764  | -1.52608 | 0.01203  |
| Cu | -0.28579 | 0.45928  | 0.05185  |

69.  $L^1CuXO_2$   $\eta^1$  singlet, X = 2-pyridinamine

|    |          |          |          |
|----|----------|----------|----------|
| Cu | 0.12626  | -1.12031 | -0.31406 |
| O  | 0.70338  | -3.36018 | 1.37077  |
| O  | -0.23394 | -2.75485 | 0.71233  |
| N  | 1.10281  | -2.16854 | -2.06663 |
| N  | 0.91005  | -0.20806 | 1.31223  |
| N  | -1.23574 | 0.25981  | -0.84952 |
| C  | -2.75217 | 2.11936  | -0.25183 |
| C  | 1.85824  | -0.91568 | 2.07963  |
| C  | 1.49011  | -1.58939 | 3.28956  |
| C  | 2.48376  | -2.29309 | 3.98518  |
| C  | 3.78852  | -2.35667 | 3.52346  |
| C  | 4.13878  | -1.71041 | 2.33642  |

|   |          |          |          |
|---|----------|----------|----------|
| C | 3.19944  | -1.00181 | 1.59171  |
| C | 0.09586  | -1.51473 | 3.91598  |
| C | 0.13693  | -0.76231 | 5.26653  |
| C | -0.54452 | -2.89901 | 4.14382  |
| C | 3.62471  | -0.25030 | 0.33263  |
| C | 4.82208  | -0.88642 | -0.39258 |
| C | 3.93181  | 1.22914  | 0.64905  |
| C | -1.90685 | 0.16454  | -2.10622 |
| C | -2.81990 | -0.89580 | -2.32945 |
| C | -3.38559 | -1.03422 | -3.60175 |
| C | -3.05962 | -0.16671 | -4.63948 |
| C | -2.15532 | 0.86732  | -4.41149 |
| C | -1.56659 | 1.06008  | -3.15673 |
| C | -3.19985 | -1.87888 | -1.22414 |
| C | -2.82775 | -3.32805 | -1.59267 |
| C | -4.69306 | -1.77126 | -0.85890 |
| C | -0.54290 | 2.18570  | -2.97739 |
| C | -1.08138 | 3.54981  | -3.45093 |
| C | 0.78888  | 1.86684  | -3.68829 |
| C | 2.09406  | -3.09270 | -1.98416 |
| C | 0.71516  | -1.77598 | -3.30077 |
| C | 2.74302  | -3.57912 | -3.14783 |
| C | 1.28546  | -2.22069 | -4.48071 |
| C | 2.33765  | -3.14130 | -4.39006 |
| C | 0.90940  | 1.68283  | 2.92065  |
| C | 0.31706  | 0.90750  | 1.74747  |
| C | -0.81181 | 1.51647  | 1.17529  |
| C | -1.55379 | 1.22095  | 0.00926  |
| H | 3.11931  | -4.31159 | -0.74290 |
| H | 1.86324  | -3.44797 | 0.05730  |
| H | 1.24054  | 2.66472  | 2.56448  |
| H | 1.76231  | 1.17792  | 3.37051  |
| H | 0.15430  | 1.85949  | 3.69109  |
| H | -1.15961 | 2.39067  | 1.71554  |
| H | -3.11727 | 2.55165  | 0.68202  |
| H | -3.56306 | 1.56386  | -0.72720 |
| H | -2.48790 | 2.94421  | -0.92158 |
| H | 2.21960  | -2.80120 | 4.90796  |
| H | 4.54038  | -2.90477 | 4.08541  |
| H | 5.16604  | -1.76130 | 1.99189  |
| H | -0.55791 | -0.96475 | 3.23486  |
| H | -0.87961 | -0.62393 | 5.65151  |
| H | 0.60679  | 0.22066  | 5.19188  |
| H | 0.69448  | -1.33708 | 6.01441  |
| H | -1.54961 | -2.77320 | 4.56238  |
| H | 0.03404  | -3.49190 | 4.86208  |
| H | -0.61042 | -3.46136 | 3.21431  |
| H | 2.77345  | -0.26754 | -0.35596 |
| H | 4.97128  | -0.39644 | -1.36075 |
| H | 4.65561  | -1.95175 | -0.56989 |
| H | 5.75496  | -0.76905 | 0.17143  |
| H | 4.21587  | 1.76536  | -0.26373 |
| H | 4.76407  | 1.30848  | 1.35849  |
| H | 3.06898  | 1.73970  | 1.08342  |
| H | -4.09052 | -1.84138 | -3.78237 |
| H | -3.50480 | -0.29687 | -5.62202 |
| H | -1.89535 | 1.53623  | -5.22756 |
| H | -2.62816 | -1.61502 | -0.33049 |
| H | -3.06158 | -4.00261 | -0.76221 |
| H | -1.75903 | -3.41908 | -1.80651 |
| H | -3.38243 | -3.67608 | -2.47175 |
| H | -4.93180 | -2.44362 | -0.02731 |
| H | -5.33498 | -2.04642 | -1.70370 |
| H | -4.95977 | -0.75301 | -0.55662 |

|                                                      |          |          |          |
|------------------------------------------------------|----------|----------|----------|
| H                                                    | -0.31699 | 2.27369  | -1.91208 |
| H                                                    | -0.37159 | 4.34576  | -3.19953 |
| H                                                    | -2.04181 | 3.79265  | -2.98549 |
| H                                                    | -1.22643 | 3.57531  | -4.53649 |
| H                                                    | 1.50564  | 2.68348  | -3.54241 |
| H                                                    | 0.64280  | 1.74036  | -4.76729 |
| H                                                    | 1.24251  | 0.94987  | -3.30255 |
| N                                                    | 2.48862  | -3.52446 | -0.75849 |
| H                                                    | -0.09738 | -1.06194 | -3.32627 |
| H                                                    | 3.54665  | -4.30181 | -3.04049 |
| H                                                    | 0.92064  | -1.85639 | -5.43396 |
| H                                                    | 2.82700  | -3.51674 | -5.28480 |
| 70. $L^1CuXO_2$ $\eta^1$ triplet, X = 2-pyridinamine |          |          |          |
| Cu                                                   | 0.23115  | -1.07933 | -0.30914 |
| O                                                    | -0.89443 | -3.89560 | 0.44388  |
| O                                                    | -1.06408 | -2.69049 | 0.65817  |
| N                                                    | 0.95319  | -2.43235 | -1.72105 |
| N                                                    | 0.87687  | -0.20474 | 1.37491  |
| N                                                    | -1.21881 | 0.24055  | -0.86998 |
| C                                                    | -2.71355 | 2.13469  | -0.34361 |
| C                                                    | 2.05584  | -0.66981 | 2.03505  |
| C                                                    | 1.96975  | -1.67425 | 3.04229  |
| C                                                    | 3.15220  | -2.13393 | 3.63564  |
| C                                                    | 4.39617  | -1.63492 | 3.26242  |
| C                                                    | 4.47275  | -0.66441 | 2.26784  |
| C                                                    | 3.32519  | -0.17527 | 1.63424  |
| C                                                    | 0.63044  | -2.23190 | 3.52066  |
| C                                                    | 0.28665  | -1.72409 | 4.93613  |
| C                                                    | 0.58758  | -3.77133 | 3.48723  |
| C                                                    | 3.46420  | 0.88371  | 0.54293  |
| C                                                    | 4.34969  | 0.38853  | -0.61876 |
| C                                                    | 3.99276  | 2.21409  | 1.11052  |
| C                                                    | -1.79063 | 0.20907  | -2.17743 |
| C                                                    | -2.87463 | -0.65928 | -2.47105 |
| C                                                    | -3.35279 | -0.72128 | -3.78565 |
| C                                                    | -2.78216 | 0.03330  | -4.80523 |
| C                                                    | -1.70834 | 0.86970  | -4.51440 |
| C                                                    | -1.19655 | 0.97802  | -3.21665 |
| C                                                    | -3.53238 | -1.52245 | -1.39600 |
| C                                                    | -3.42634 | -3.02554 | -1.72274 |
| C                                                    | -5.00759 | -1.13613 | -1.16850 |
| C                                                    | 0.01341  | 1.87722  | -2.96201 |
| C                                                    | -0.19653 | 3.31177  | -3.48167 |
| C                                                    | 1.29509  | 1.26575  | -3.56311 |
| C                                                    | 1.92997  | -3.32777 | -1.43610 |
| C                                                    | 0.35475  | -2.49730 | -2.93348 |
| C                                                    | 2.29485  | -4.33311 | -2.36158 |
| C                                                    | 0.66623  | -3.44622 | -3.89148 |
| C                                                    | 1.65744  | -4.38733 | -3.58426 |
| C                                                    | 0.66163  | 1.56706  | 3.10845  |
| C                                                    | 0.20736  | 0.85316  | 1.83893  |
| C                                                    | -0.93939 | 1.41958  | 1.24146  |
| C                                                    | -1.57188 | 1.18608  | -0.00177 |
| H                                                    | 3.08563  | -4.01193 | 0.11288  |
| H                                                    | 2.29439  | -2.52681 | 0.42992  |
| H                                                    | 0.97129  | 2.59119  | 2.87150  |
| H                                                    | 1.49215  | 1.06755  | 3.60484  |
| H                                                    | -0.17306 | 1.64110  | 3.81326  |
| H                                                    | -1.36600 | 2.23876  | 1.80972  |
| H                                                    | -2.98277 | 2.75485  | 0.51317  |
| H                                                    | -3.59878 | 1.58168  | -0.66724 |
| H                                                    | -2.43884 | 2.79580  | -1.17224 |
| H                                                    | 3.09394  | -2.88924 | 4.41515  |
| H                                                    | 5.29958  | -2.00375 | 3.74067  |

|   |          |          |          |
|---|----------|----------|----------|
| H | 5.44506  | -0.27923 | 1.97254  |
| H | -0.14136 | -1.86428 | 2.84063  |
| H | -0.69864 | -2.09083 | 5.24575  |
| H | 0.26866  | -0.63110 | 4.98027  |
| H | 1.01899  | -2.07602 | 5.67155  |
| H | -0.41363 | -4.12959 | 3.75218  |
| H | 1.29236  | -4.21375 | 4.20086  |
| H | 0.82982  | -4.15961 | 2.49405  |
| H | 2.46618  | 1.06782  | 0.13774  |
| H | 4.37146  | 1.12713  | -1.42790 |
| H | 3.97348  | -0.55392 | -1.02774 |
| H | 5.38352  | 0.22206  | -0.29483 |
| H | 4.02769  | 2.97966  | 0.32747  |
| H | 5.00708  | 2.10535  | 1.51157  |
| H | 3.35506  | 2.58515  | 1.91972  |
| H | -4.18930 | -1.37713 | -4.01351 |
| H | -3.16751 | -0.03288 | -5.81919 |
| H | -1.25441 | 1.45013  | -5.31375 |
| H | -2.99232 | -1.34905 | -0.46115 |
| H | -3.82548 | -3.62769 | -0.89862 |
| H | -2.38846 | -3.32954 | -1.88703 |
| H | -3.99548 | -3.28297 | -2.62320 |
| H | -5.44242 | -1.73927 | -0.36298 |
| H | -5.60726 | -1.30460 | -2.07029 |
| H | -5.11533 | -0.08285 | -0.89220 |
| H | 0.16346  | 1.93793  | -1.88176 |
| H | 0.65417  | 3.94491  | -3.20521 |
| H | -1.10167 | 3.76332  | -3.06273 |
| H | -0.28618 | 3.34353  | -4.57332 |
| H | 2.16306  | 1.90186  | -3.35296 |
| H | 1.21359  | 1.16078  | -4.65137 |
| H | 1.49508  | 0.27471  | -3.14442 |
| N | 2.59613  | -3.21192 | -0.25500 |
| H | -0.42181 | -1.76100 | -3.10947 |
| H | 3.08161  | -5.03527 | -2.10496 |
| H | 0.14525  | -3.45459 | -4.84178 |
| H | 1.93180  | -5.15464 | -4.30295 |

71.  $L^1CuXO_2$   $\eta^2$  singlet, X = 2-pyridinamine

|    |               |               |               |
|----|---------------|---------------|---------------|
| Cu | -0.2574428600 | -1.2443400354 | 0.0550900043  |
| O  | -0.2367029198 | -3.0549589307 | 0.6617262531  |
| O  | -1.1503894595 | -2.8815169288 | -0.2998761965 |
| N  | 1.3483155292  | -2.3186254712 | -1.7163385777 |
| N  | 0.6251825276  | -0.1677519857 | 1.4263440011  |
| N  | -1.3212801385 | 0.1621950349  | -0.8005388473 |
| C  | -2.7609552658 | 2.1512600696  | -0.5282387365 |
| C  | 1.8749197664  | -0.5870400328 | 1.9844172835  |
| C  | 1.8985150908  | -1.6094391723 | 2.9716851842  |
| C  | 3.1408502373  | -2.0184550456 | 3.4722816791  |
| C  | 4.3296125838  | -1.4555959607 | 3.0181208222  |
| C  | 4.2922696630  | -0.4638221093 | 2.0443172215  |
| C  | 3.0811881127  | -0.0105296267 | 1.5091624815  |
| C  | 0.6245472192  | -2.2444771834 | 3.5289389845  |
| C  | 0.3072015122  | -1.7193703055 | 4.9440677572  |
| C  | 0.6867895425  | -3.7838332936 | 3.5357054717  |
| C  | 3.1078297456  | 1.0645632400  | 0.4232800968  |
| C  | 3.7257397147  | 0.5254790314  | -0.8819723243 |
| C  | 3.8458488800  | 2.3368073555  | 0.8847028618  |
| C  | -1.8305393491 | 0.0276083011  | -2.1361795474 |
| C  | -3.0244835840 | -0.6896175708 | -2.3969758485 |
| C  | -3.4958969621 | -0.7334260177 | -3.7155080566 |
| C  | -2.8164431620 | -0.1101123694 | -4.7550288291 |
| C  | -1.6204417616 | 0.5522567525  | -4.4943035581 |

|   |               |               |               |
|---|---------------|---------------|---------------|
| C | -1.0964358906 | 0.6237925466  | -3.1991319490 |
| C | -3.8099166066 | -1.4280545068 | -1.3151252718 |
| C | -3.9332772999 | -2.9303847918 | -1.6413454676 |
| C | -5.2140293967 | -0.8248818045 | -1.1034857816 |
| C | 0.2414299533  | 1.3277390716  | -2.9594784483 |
| C | 0.0710679924  | 2.8505352519  | -2.7833817622 |
| C | 1.2721151097  | 1.0485102060  | -4.0707212817 |
| C | 2.3551360493  | -3.1708490483 | -1.4369382434 |
| C | 0.7657625566  | -2.4223215804 | -2.9248652941 |
| C | 2.8213138040  | -4.1164547631 | -2.3794604297 |
| C | 1.1533533171  | -3.3194510604 | -3.9100399438 |
| C | 2.2148164747  | -4.1840935061 | -3.6199139267 |
| C | 0.5981863792  | 1.7327518830  | 3.0021363442  |
| C | 0.0390865630  | 0.9608815023  | 1.8184760465  |
| C | -1.0742357528 | 1.5412342389  | 1.1827858480  |
| C | -1.6558470090 | 1.2183261847  | -0.0576116914 |
| H | 3.5116690644  | -3.8466513138 | 0.0986311416  |
| H | 2.4344528720  | -2.6059329991 | 0.5181170413  |
| H | 1.3301260320  | 2.4735056560  | 2.6607343906  |
| H | 1.0991358807  | 1.0813165076  | 3.7190235431  |
| H | -0.2044512215 | 2.2739363547  | 3.5092720325  |
| H | -1.4771923267 | 2.4208917956  | 1.6688396712  |
| H | -2.6970308861 | 3.1150694649  | -0.0200754571 |
| H | -3.7353637622 | 1.7094382560  | -0.2936414650 |
| H | -2.7339407521 | 2.3143999834  | -1.6062253563 |
| H | 3.1744078025  | -2.7909671906 | 4.2350719919  |
| H | 5.2816018759  | -1.7920610455 | 3.4201167845  |
| H | 5.2236480298  | -0.0362958738 | 1.6838905884  |
| H | -0.2011192892 | -1.9640290188 | 2.8727959590  |
| H | -0.6192471713 | -2.1700570727 | 5.3174957332  |
| H | 0.1783164513  | -0.6327467905 | 4.9580227596  |
| H | 1.1086004262  | -1.9701226740 | 5.6485538651  |
| H | -0.2864487892 | -4.1934365655 | 3.8253957580  |
| H | 1.4257643081  | -4.1641551152 | 4.2504820611  |
| H | 0.9293726072  | -4.1760755643 | 2.5454478496  |
| H | 2.0757055371  | 1.3465895308  | 0.1995987596  |
| H | 3.7388837845  | 1.3097874190  | -1.6478812916 |
| H | 3.1565857456  | -0.3230246503 | -1.2688168841 |
| H | 4.7591517618  | 0.1961334467  | -0.7248438773 |
| H | 3.7605840651  | 3.1213628115  | 0.1246515727  |
| H | 4.9140313923  | 2.1507859172  | 1.0428272609  |
| H | 3.4381241217  | 2.7282917704  | 1.8221771088  |
| H | -4.4158989628 | -1.2708173170 | -3.9281985474 |
| H | -3.2074615527 | -0.1531115952 | -5.7679959039 |
| H | -1.0792361233 | 1.0141215388  | -5.3140631615 |
| H | -3.2538428336 | -1.3449345750 | -0.3782617994 |
| H | -4.4112625431 | -3.4574887102 | -0.8085859757 |
| H | -2.9536087784 | -3.3824383762 | -1.8075925625 |
| H | -4.5474503935 | -3.0974046104 | -2.5341177280 |
| H | -5.7316766946 | -1.3438157423 | -0.2888826801 |
| H | -5.8313529812 | -0.9269156558 | -2.0037251251 |
| H | -5.1749918932 | 0.2393802505  | -0.8520936395 |
| H | 0.6508092916  | 0.9294158868  | -2.0262409926 |
| H | 1.0462639475  | 3.3297880030  | -2.6409037906 |
| H | -0.5492564430 | 3.0980937191  | -1.9184516730 |
| H | -0.3932666189 | 3.2954564322  | -3.6711286888 |
| H | 2.2496587957  | 1.4443734504  | -3.7770623039 |
| H | 1.0012199495  | 1.5331966594  | -5.0151608744 |
| H | 1.3878321777  | -0.0220633379 | -4.2598719992 |
| N | 2.9655904991  | -3.0585103523 | -0.2127677103 |
| H | -0.0619740974 | -1.7449891420 | -3.1048722162 |
| H | 3.6431246652  | -4.7767813077 | -2.1174629268 |
| H | 0.6371865110  | -3.3447645730 | -4.8635423308 |
| H | 2.5592896329  | -4.9067088314 | -4.3549012259 |



72.  $L^1CuXO_2$   $\eta^2$  triplet, X = 2-pyridinamine

|    |          |          |          |
|----|----------|----------|----------|
| Cu | -0.05908 | -1.17150 | -0.14277 |
| O  | -0.30294 | -3.22755 | 0.59687  |
| O  | -1.16600 | -3.01365 | -0.31804 |
| N  | 1.27674  | -2.29268 | -1.65673 |
| N  | 0.67398  | -0.16163 | 1.41731  |
| N  | -1.35329 | 0.18516  | -0.84318 |
| C  | -2.81359 | 2.14810  | -0.45805 |
| C  | 1.88483  | -0.59032 | 2.04286  |
| C  | 1.86071  | -1.62791 | 3.01460  |
| C  | 3.07672  | -2.06812 | 3.55370  |
| C  | 4.29202  | -1.52348 | 3.15136  |
| C  | 4.30712  | -0.51709 | 2.19107  |
| C  | 3.12399  | -0.03231 | 1.62302  |
| C  | 0.55533  | -2.25053 | 3.50571  |
| C  | 0.15769  | -1.70625 | 4.89323  |
| C  | 0.61105  | -3.78983 | 3.54327  |
| C  | 3.20754  | 1.05426  | 0.55103  |
| C  | 3.80794  | 0.50556  | -0.75897 |
| C  | 3.99986  | 2.28565  | 1.03049  |
| C  | -1.91182 | 0.05152  | -2.15486 |
| C  | -3.08253 | -0.71763 | -2.38185 |
| C  | -3.57457 | -0.81408 | -3.68966 |
| C  | -2.93737 | -0.19426 | -4.75838 |
| C  | -1.76815 | 0.52613  | -4.53333 |
| C  | -1.22898 | 0.65565  | -3.24864 |
| C  | -3.82667 | -1.44376 | -1.26246 |
| C  | -4.00581 | -2.94485 | -1.57083 |
| C  | -5.20552 | -0.81195 | -0.98170 |
| C  | 0.06696  | 1.44412  | -3.04750 |
| C  | -0.19371 | 2.96330  | -2.97932 |
| C  | 1.12861  | 1.14827  | -4.12462 |
| C  | 2.28379  | -3.14203 | -1.35286 |
| C  | 0.73974  | -2.37547 | -2.89346 |
| C  | 2.77414  | -4.08161 | -2.29049 |
| C  | 1.16051  | -3.26451 | -3.86820 |
| C  | 2.20667  | -4.13900 | -3.54704 |
| C  | 0.57007  | 1.71316  | 3.02377  |
| C  | 0.04962  | 0.94500  | 1.81766  |
| C  | -1.05966 | 1.52279  | 1.16928  |
| C  | -1.67701 | 1.21399  | -0.06179 |
| H  | 3.42647  | -3.80965 | 0.20563  |
| H  | 2.38301  | -2.51623 | 0.60087  |
| H  | 1.34728  | 2.42084  | 2.71246  |
| H  | 1.01439  | 1.05574  | 3.77240  |
| H  | -0.23308 | 2.28946  | 3.48794  |
| H  | -1.46875 | 2.39275  | 1.66916  |
| H  | -2.65153 | 3.14963  | -0.05369 |
| H  | -3.75615 | 1.77518  | -0.04160 |
| H  | -2.93993 | 2.21632  | -1.53896 |
| H  | 3.06868  | -2.85298 | 4.30466  |
| H  | 5.22241  | -1.88348 | 3.58232  |
| H  | 5.25864  | -0.10216 | 1.86944  |
| H  | -0.22715 | -1.96593 | 2.79810  |
| H  | -0.78585 | -2.15520 | 5.22387  |
| H  | 0.02502  | -0.62067 | 4.88398  |
| H  | 0.92229  | -1.94377 | 5.64218  |
| H  | -0.38154 | -4.19458 | 3.76705  |
| H  | 1.29337  | -4.15688 | 4.31872  |
| H  | 0.92986  | -4.20524 | 2.58396  |
| H  | 2.18999  | 1.38233  | 0.32537  |
| H  | 3.85643  | 1.29606  | -1.51715 |

S106

|   |          |          |          |
|---|----------|----------|----------|
| H | 3.20491  | -0.31297 | -1.15944 |
| H | 4.82575  | 0.12974  | -0.60360 |
| H | 3.95446  | 3.08181  | 0.27916  |
| H | 5.05774  | 2.05099  | 1.19303  |
| H | 3.60254  | 2.68374  | 1.96959  |
| H | -4.47706 | -1.39101 | -3.87222 |
| H | -3.34215 | -0.28159 | -5.76307 |
| H | -1.26166 | 0.99378  | -5.37262 |
| H | -3.22226 | -1.35977 | -0.35516 |
| H | -4.43489 | -3.45878 | -0.70350 |
| H | -3.05482 | -3.42603 | -1.80773 |
| H | -4.68744 | -3.10314 | -2.41453 |
| H | -5.69272 | -1.31602 | -0.13921 |
| H | -5.86582 | -0.90748 | -1.85155 |
| H | -5.13115 | 0.25188  | -0.74140 |
| H | 0.48371  | 1.13646  | -2.08343 |
| H | 0.74607  | 3.50874  | -2.83466 |
| H | -0.86231 | 3.22704  | -2.15613 |
| H | -0.64939 | 3.32115  | -3.91019 |
| H | 2.07875  | 1.61939  | -3.85037 |
| H | 0.84330  | 1.54767  | -5.10454 |
| H | 1.30797  | 0.07551  | -4.24055 |
| N | 2.85700  | -3.04475 | -0.11840 |
| H | -0.08077 | -1.69567 | -3.09427 |
| H | 3.58770  | -4.74294 | -2.00816 |
| H | 0.67998  | -3.27809 | -4.83977 |
| H | 2.57030  | -4.85973 | -4.27433 |

73. L<sup>1</sup>CuX, X = pyrazole

|   |          |          |          |
|---|----------|----------|----------|
| N | -0.03074 | -1.80861 | -0.44075 |
| C | 0.49271  | -4.00634 | -0.54575 |
| C | -0.88115 | -3.87584 | -0.66405 |
| C | 3.14870  | 1.02816  | 1.40192  |
| C | 4.48475  | 0.61492  | 1.43822  |
| C | 5.24062  | 0.49813  | 0.27560  |
| C | 4.65412  | 0.79209  | -0.95170 |
| C | 3.32084  | 1.20588  | -1.04406 |
| C | 2.33966  | 1.08978  | 2.69474  |
| C | 3.04465  | 1.88976  | 3.80466  |
| C | 1.98515  | -0.32915 | 3.18420  |
| C | 2.70498  | 1.46017  | -2.41731 |
| C | 2.52261  | 0.13742  | -3.18953 |
| C | 3.51254  | 2.47139  | -3.25110 |
| C | -3.00789 | 0.41251  | -0.32263 |
| C | -3.62931 | -0.16158 | 0.82109  |
| C | -4.68737 | -1.05875 | 0.63771  |
| C | -5.14477 | -1.39469 | -0.63455 |
| C | -4.54072 | -0.82025 | -1.75046 |
| C | -3.47990 | 0.08497  | -1.62385 |
| C | -3.13241 | 0.14410  | 2.23197  |
| C | -2.38081 | -1.06368 | 2.82822  |
| C | -4.26371 | 0.59755  | 3.17182  |
| C | -2.82866 | 0.66780  | -2.87692 |
| C | -3.84382 | 1.38207  | -3.78725 |
| C | -2.05845 | -0.41195 | -3.66405 |
| C | 1.72802  | 4.02969  | 0.33017  |
| C | 0.72456  | 2.89940  | 0.15464  |
| C | -0.63996 | 3.27729  | 0.09803  |
| C | -1.81399 | 2.50537  | -0.05033 |
| C | -3.13319 | 3.26140  | -0.06645 |
| C | 2.55995  | 1.33329  | 0.14680  |
| H | -1.66656 | -4.60436 | -0.79534 |
| H | -2.05162 | -2.08349 | -0.62251 |

|    |          |          |          |
|----|----------|----------|----------|
| H  | 1.05873  | -4.92487 | -0.56361 |
| H  | 1.99222  | -2.33281 | -0.28924 |
| H  | 1.23351  | 5.00213  | 0.35610  |
| H  | 2.46083  | 4.03278  | -0.48327 |
| H  | 2.29509  | 3.90468  | 1.25907  |
| H  | -0.81235 | 4.34333  | 0.18412  |
| H  | -2.97971 | 4.33623  | 0.04353  |
| H  | -3.78781 | 2.92015  | 0.74302  |
| H  | -3.67421 | 3.08251  | -1.00201 |
| H  | 4.94147  | 0.37576  | 2.39546  |
| H  | 6.27849  | 0.17960  | 0.32575  |
| H  | 5.24329  | 0.69214  | -1.86013 |
| H  | 1.39718  | 1.59584  | 2.47029  |
| H  | 2.39164  | 1.98276  | 4.67973  |
| H  | 3.30439  | 2.89909  | 3.46890  |
| H  | 3.96856  | 1.40432  | 4.13868  |
| H  | 1.37187  | -0.28798 | 4.09209  |
| H  | 2.88950  | -0.90477 | 3.41519  |
| H  | 1.42282  | -0.87735 | 2.42113  |
| H  | 1.70908  | 1.88215  | -2.25968 |
| H  | 2.03903  | 0.31383  | -4.15769 |
| H  | 1.90111  | -0.56412 | -2.62369 |
| H  | 3.48745  | -0.34729 | -3.38030 |
| H  | 2.99860  | 2.68405  | -4.19537 |
| H  | 4.51029  | 2.09258  | -3.50021 |
| H  | 3.64253  | 3.41860  | -2.71754 |
| H  | -5.16177 | -1.50459 | 1.50847  |
| H  | -5.96815 | -2.09354 | -0.75528 |
| H  | -4.90067 | -1.07987 | -2.74314 |
| H  | -2.41374 | 0.96406  | 2.15628  |
| H  | -2.00482 | -0.83160 | 3.83130  |
| H  | -1.52423 | -1.34163 | 2.20592  |
| H  | -3.03820 | -1.93750 | 2.91194  |
| H  | -3.85299 | 0.89300  | 4.14364  |
| H  | -4.99157 | -0.20104 | 3.35488  |
| H  | -4.80808 | 1.45390  | 2.76059  |
| H  | -2.09678 | 1.41085  | -2.55013 |
| H  | -3.32923 | 1.85885  | -4.62892 |
| H  | -4.39386 | 2.15765  | -3.24470 |
| H  | -4.57925 | 0.68557  | -4.20576 |
| H  | -1.58572 | 0.01908  | -4.55387 |
| H  | -2.72706 | -1.21436 | -3.99804 |
| H  | -1.26911 | -0.86024 | -3.05238 |
| C  | 0.98115  | -2.69506 | -0.40629 |
| N  | -1.15214 | -2.55172 | -0.59569 |
| N  | 1.17045  | 1.64729  | 0.07155  |
| N  | -1.82510 | 1.17959  | -0.17425 |
| Cu | -0.11283 | 0.18038  | -0.18760 |

74.  $L^1CuXO_2$   $\eta^1$  singlet, X = pyrazole

|   |          |          |          |
|---|----------|----------|----------|
| C | 0.86117  | -3.67832 | -0.85496 |
| C | 3.98372  | 1.33011  | 3.41808  |
| C | 3.04546  | -0.92774 | 2.73782  |
| C | 2.57850  | 2.20622  | -2.49092 |
| C | 2.15442  | 1.14597  | -3.52744 |
| C | 3.32006  | 3.35736  | -3.19828 |
| C | -2.67608 | 0.69826  | -0.17546 |
| C | -3.61470 | 0.51700  | 0.87679  |
| C | -4.83439 | -0.09777 | 0.57731  |
| C | -5.12819 | -0.54946 | -0.70529 |
| C | -4.18734 | -0.40098 | -1.71862 |
| N | 1.03040  | -1.49032 | -0.45142 |
| C | -2.95253 | 0.21060  | -1.48030 |

|   |          |          |          |
|---|----------|----------|----------|
| C | -3.35420 | 0.98978  | 2.30476  |
| C | -3.59946 | -0.13280 | 3.33336  |
| C | -4.20802 | 2.22323  | 2.66757  |
| C | -1.97194 | 0.37279  | -2.63866 |
| C | -2.51478 | 1.33795  | -3.71270 |
| C | -1.60848 | -0.98394 | -3.27283 |
| C | 2.19984  | 4.09999  | 0.50647  |
| C | 1.14652  | 3.01444  | 0.35967  |
| C | -0.19266 | 3.44093  | 0.32465  |
| C | 2.03184  | -3.24435 | -1.45924 |
| C | -1.36868 | 2.69975  | 0.07402  |
| C | -2.58650 | 3.53397  | -0.29832 |
| C | 2.88119  | 1.40127  | -0.04097 |
| C | 3.66676  | 0.78026  | 0.96127  |
| C | 4.95907  | 0.35623  | 0.63387  |
| C | 5.47616  | 0.52880  | -0.64606 |
| C | 4.69737  | 1.13896  | -1.62571 |
| C | 3.39902  | 1.58551  | -1.35521 |
| C | 3.14009  | 0.56842  | 2.37827  |
| H | 2.84639  | -1.14953 | -1.45186 |
| H | 0.40034  | -4.65426 | -0.80608 |
| H | -0.54699 | -2.52922 | 0.34743  |
| H | 2.73732  | -3.83358 | -2.02475 |
| H | 1.74330  | 5.04933  | 0.79190  |
| H | 2.75006  | 4.25262  | -0.42588 |
| H | 2.93527  | 3.81939  | 1.26658  |
| H | -0.33600 | 4.51236  | 0.39076  |
| H | -2.54339 | 4.51523  | 0.17926  |
| H | -3.52923 | 3.05143  | -0.04564 |
| H | -2.58481 | 3.69661  | -1.38319 |
| H | 5.56950  | -0.12075 | 1.39588  |
| H | 6.48058  | 0.18809  | -0.88178 |
| H | 5.10431  | 1.26479  | -2.62550 |
| H | 2.12802  | 0.98213  | 2.41807  |
| H | 3.54830  | 1.21949  | 4.41734  |
| H | 4.03465  | 2.39963  | 3.18793  |
| H | 5.01089  | 0.95063  | 3.46059  |
| H | 2.62851  | -1.05210 | 3.74342  |
| H | 4.03224  | -1.40447 | 2.72430  |
| H | 2.40145  | -1.46491 | 2.03669  |
| H | 1.66064  | 2.61874  | -2.06575 |
| H | 1.55030  | 1.60482  | -4.31898 |
| H | 1.56179  | 0.35086  | -3.06896 |
| H | 3.02805  | 0.68407  | -4.00203 |
| H | 2.65793  | 3.84266  | -3.92384 |
| H | 4.19686  | 2.99938  | -3.74877 |
| H | 3.66365  | 4.12107  | -2.49360 |
| H | -5.56780 | -0.22778 | 1.36781  |
| H | -6.08564 | -1.01959 | -0.91361 |
| H | -4.41980 | -0.75711 | -2.71872 |
| H | -2.29975 | 1.26797  | 2.37177  |
| H | -3.26961 | 0.19543  | 4.32543  |
| H | -3.05217 | -1.03663 | 3.06160  |
| H | -4.66438 | -0.38146 | 3.41222  |
| H | -4.00622 | 2.52942  | 3.70005  |
| H | -5.27787 | 1.99593  | 2.59317  |
| H | -4.00571 | 3.08209  | 2.02170  |
| H | -1.05265 | 0.80779  | -2.23733 |
| H | -1.77320 | 1.48859  | -4.50555 |
| H | -2.76089 | 2.31759  | -3.29079 |
| H | -3.42393 | 0.94355  | -4.18092 |
| H | -0.86023 | -0.84826 | -4.06181 |
| H | -2.48296 | -1.46189 | -3.72876 |
| H | -1.19787 | -1.67304 | -2.52982 |

|    |          |          |          |
|----|----------|----------|----------|
| N  | 0.28801  | -2.60695 | -0.27502 |
| C  | 2.09360  | -1.87086 | -1.17445 |
| N  | 1.52738  | 1.74168  | 0.24781  |
| N  | -1.44270 | 1.37193  | 0.06767  |
| O  | -0.69333 | -0.80630 | 1.77007  |
| O  | -1.55489 | -1.73554 | 1.45547  |
| Cu | 0.19664  | 0.29553  | 0.46552  |

75.  $L^1CuXO_2$   $\eta^1$  triplet, X = pyrazole

|   |          |          |          |
|---|----------|----------|----------|
| C | 0.92953  | -3.62811 | -1.08632 |
| C | 3.71513  | 1.43044  | 3.52198  |
| C | 2.86332  | -0.86479 | 2.86219  |
| C | 2.77308  | 2.14612  | -2.47461 |
| C | 2.36875  | 1.07627  | -3.50986 |
| C | 3.59548  | 3.25604  | -3.15784 |
| C | -2.72398 | 0.75007  | -0.14643 |
| C | -3.56206 | 0.50998  | 0.97494  |
| C | -4.76551 | -0.17336 | 0.76797  |
| C | -5.13899 | -0.63100 | -0.49200 |
| C | -4.29788 | -0.41157 | -1.57704 |
| N | 1.04672  | -1.46809 | -0.53116 |
| C | -3.08497 | 0.27019  | -1.43025 |
| C | -3.20651 | 0.98447  | 2.38481  |
| C | -3.40822 | -0.11327 | 3.44833  |
| C | -4.01196 | 2.23892  | 2.78340  |
| C | -2.20121 | 0.49247  | -2.65639 |
| C | -2.88445 | 1.41094  | -3.68923 |
| C | -1.77907 | -0.83780 | -3.31019 |
| C | 2.20909  | 4.09385  | 0.44088  |
| C | 1.14599  | 3.02028  | 0.26810  |
| C | -0.18379 | 3.46805  | 0.21007  |
| C | 2.12055  | -3.14058 | -1.60019 |
| C | -1.38067 | 2.74486  | 0.00224  |
| C | -2.60066 | 3.60364  | -0.29867 |
| C | 2.88676  | 1.38846  | -0.00316 |
| C | 3.59067  | 0.78566  | 1.07042  |
| C | 4.89842  | 0.33877  | 0.84988  |
| C | 5.50894  | 0.46825  | -0.39371 |
| C | 4.81146  | 1.06280  | -1.44208 |
| C | 3.50370  | 1.53328  | -1.27632 |
| C | 2.96150  | 0.61797  | 2.45177  |
| H | 2.90878  | -1.04331 | -1.40606 |
| H | 0.48520  | -4.61221 | -1.11374 |
| H | -0.50508 | -2.59671 | 0.15449  |
| H | 2.86449  | -3.68526 | -2.16088 |
| H | 1.76108  | 5.03477  | 0.76509  |
| H | 2.74564  | 4.27827  | -0.49503 |
| H | 2.95478  | 3.78594  | 1.17934  |
| H | -0.30919 | 4.54343  | 0.26071  |
| H | -2.62348 | 4.48079  | 0.35366  |
| H | -3.53749 | 3.05846  | -0.19640 |
| H | -2.53433 | 3.97002  | -1.33007 |
| H | 5.44611  | -0.12230 | 1.66768  |
| H | 6.52322  | 0.10970  | -0.54597 |
| H | 5.29178  | 1.15912  | -2.41214 |
| H | 1.94322  | 1.01363  | 2.39968  |
| H | 3.21201  | 1.34428  | 4.49147  |
| H | 3.76308  | 2.49257  | 3.26010  |
| H | 4.74326  | 1.07310  | 3.64971  |
| H | 2.36530  | -0.96023 | 3.83336  |
| H | 3.85515  | -1.32325 | 2.94983  |
| H | 2.28937  | -1.44169 | 2.13187  |
| H | 1.84738  | 2.59850  | -2.11089 |

S110

|    |          |          |          |
|----|----------|----------|----------|
| H  | 1.85623  | 1.54096  | -4.36015 |
| H  | 1.69336  | 0.33264  | -3.07783 |
| H  | 3.24687  | 0.54799  | -3.89970 |
| H  | 2.99646  | 3.75033  | -3.93058 |
| H  | 4.49079  | 2.85682  | -3.64696 |
| H  | 3.92319  | 4.01910  | -2.44470 |
| H  | -5.42106 | -0.35634 | 1.61444  |
| H  | -6.07901 | -1.15965 | -0.62526 |
| H  | -4.58849 | -0.77375 | -2.55977 |
| H  | -2.14551 | 1.24832  | 2.38379  |
| H  | -3.01123 | 0.22677  | 4.41154  |
| H  | -2.89690 | -1.03839 | 3.17659  |
| H  | -4.46973 | -0.34014 | 3.60106  |
| H  | -3.73199 | 2.56829  | 3.79060  |
| H  | -5.08713 | 2.02487  | 2.79016  |
| H  | -3.84444 | 3.07481  | 2.09963  |
| H  | -1.28960 | 0.99580  | -2.32174 |
| H  | -2.21486 | 1.60810  | -4.53435 |
| H  | -3.16435 | 2.37246  | -3.24736 |
| H  | -3.79643 | 0.95302  | -4.08900 |
| H  | -1.09589 | -0.65386 | -4.14732 |
| H  | -2.64222 | -1.38593 | -3.70412 |
| H  | -1.26875 | -1.48911 | -2.59423 |
| N  | 0.31375  | -2.60183 | -0.46944 |
| C  | 2.14999  | -1.78847 | -1.22237 |
| N  | 1.51710  | 1.74219  | 0.16723  |
| N  | -1.46909 | 1.42051  | 0.01425  |
| O  | -0.69715 | -0.82709 | 1.76659  |
| O  | -1.22368 | -1.99336 | 1.64593  |
| Cu | 0.15300  | 0.26935  | 0.23970  |

76.  $L^1CuXO_2$   $\eta^2$  singlet, X = pyrazole

|   |          |          |          |
|---|----------|----------|----------|
| C | 0.06656  | -3.70515 | -0.83862 |
| C | 3.76210  | 1.77737  | 3.26150  |
| C | 3.13874  | -0.65387 | 2.92927  |
| C | 1.97262  | 2.14506  | -2.50351 |
| C | 1.57960  | 1.07199  | -3.53752 |
| C | 2.63123  | 3.34029  | -3.22189 |
| C | -2.95480 | 0.76095  | -0.38723 |
| C | -3.89233 | 0.49849  | 0.64786  |
| C | -5.05752 | -0.20592 | 0.32323  |
| C | -5.29729 | -0.65853 | -0.97003 |
| C | -4.35670 | -0.42084 | -1.96558 |
| N | 0.56050  | -1.51402 | -0.79691 |
| C | -3.17243 | 0.27711  | -1.70054 |
| C | -3.69953 | 0.98024  | 2.08585  |
| C | -3.86641 | -0.15697 | 3.11145  |
| C | -4.66007 | 2.13895  | 2.42666  |
| C | -2.17894 | 0.51100  | -2.83469 |
| C | -2.71488 | 1.54544  | -3.84526 |
| C | -1.80711 | -0.79914 | -3.55460 |
| C | 1.83930  | 4.20855  | 0.42986  |
| C | 0.76560  | 3.14092  | 0.32342  |
| C | -0.56216 | 3.58147  | 0.22036  |
| C | 1.11182  | -3.51005 | -1.72480 |
| C | -1.71188 | 2.82274  | -0.09555 |
| C | -2.92592 | 3.63324  | -0.51626 |
| C | 2.45739  | 1.45619  | -0.04041 |
| C | 3.33123  | 0.90096  | 0.92756  |
| C | 4.59824  | 0.47261  | 0.51616  |
| C | 5.00736  | 0.57493  | -0.80822 |
| C | 4.14266  | 1.12016  | -1.75193 |
| C | 2.86516  | 1.56751  | -1.40073 |

|    |          |          |          |
|----|----------|----------|----------|
| C  | 2.95789  | 0.78213  | 2.40153  |
| H  | 2.13889  | -1.56074 | -2.17679 |
| H  | -0.47223 | -4.59496 | -0.54737 |
| H  | -0.86490 | -2.23020 | 0.43689  |
| H  | 1.60809  | -4.25549 | -2.32766 |
| H  | 1.39315  | 5.19513  | 0.56555  |
| H  | 2.46952  | 4.23433  | -0.46207 |
| H  | 2.49749  | 3.99670  | 1.27770  |
| H  | -0.70850 | 4.65394  | 0.25096  |
| H  | -3.04298 | 4.50069  | 0.13880  |
| H  | -3.84554 | 3.05067  | -0.50889 |
| H  | -2.77151 | 4.01350  | -1.53244 |
| H  | 5.27739  | 0.05171  | 1.25183  |
| H  | 5.99495  | 0.23213  | -1.10469 |
| H  | 4.46537  | 1.19780  | -2.78675 |
| H  | 1.90060  | 1.03479  | 2.50449  |
| H  | 3.45518  | 1.70863  | 4.31100  |
| H  | 3.61251  | 2.81186  | 2.93500  |
| H  | 4.83672  | 1.56754  | 3.21293  |
| H  | 2.76963  | -0.72314 | 3.95816  |
| H  | 4.19226  | -0.95604 | 2.93613  |
| H  | 2.57677  | -1.36690 | 2.32241  |
| H  | 1.04717  | 2.50455  | -2.04849 |
| H  | 0.93248  | 1.50464  | -4.30971 |
| H  | 1.04112  | 0.24681  | -3.06757 |
| H  | 2.46210  | 0.66013  | -4.04081 |
| H  | 1.93175  | 3.78139  | -3.94070 |
| H  | 3.52267  | 3.03314  | -3.77938 |
| H  | 2.93521  | 4.12747  | -2.52539 |
| H  | -5.79087 | -0.40080 | 1.10024  |
| H  | -6.21192 | -1.19874 | -1.19943 |
| H  | -4.54461 | -0.78268 | -2.97232 |
| H  | -2.67585 | 1.34968  | 2.18092  |
| H  | -3.63512 | 0.21205  | 4.11681  |
| H  | -3.18907 | -0.98434 | 2.89165  |
| H  | -4.89269 | -0.54062 | 3.13424  |
| H  | -4.48665 | 2.48954  | 3.45025  |
| H  | -5.70528 | 1.81606  | 2.35883  |
| H  | -4.53288 | 2.99192  | 1.75440  |
| H  | -1.26405 | 0.91575  | -2.39372 |
| H  | -1.97311 | 1.74079  | -4.62813 |
| H  | -2.95517 | 2.49788  | -3.36270 |
| H  | -3.62687 | 1.18427  | -4.33467 |
| H  | -1.03729 | -0.60971 | -4.31026 |
| H  | -2.66807 | -1.23826 | -4.07074 |
| H  | -1.41566 | -1.54037 | -2.85359 |
| N  | -0.23416 | -2.49444 | -0.32060 |
| C  | 1.38205  | -2.12869 | -1.65578 |
| N  | 1.13296  | 1.85707  | 0.32305  |
| N  | -1.75637 | 1.49611  | -0.08904 |
| O  | -1.05755 | -0.80119 | 1.68062  |
| O  | 0.23509  | -0.69069 | 2.07574  |
| Cu | -0.23457 | 0.54121  | 0.67217  |

77.  $L^1CuXO_2$   $\eta^2$  triplet, X = pyrazole

|   |          |          |          |
|---|----------|----------|----------|
| C | 0.84671  | -3.89319 | -0.66369 |
| C | -5.23447 | -0.77742 | -0.65690 |
| C | -4.34163 | -0.52114 | -1.69212 |
| C | -3.14276 | 0.16317  | -1.46378 |
| C | -3.47089 | 0.77761  | 2.35744  |
| C | -3.67700 | -0.35741 | 3.37687  |
| C | -4.34256 | 1.98794  | 2.75714  |
| C | -2.19540 | 0.42890  | -2.63154 |

|   |          |          |          |
|---|----------|----------|----------|
| C | -2.82231 | 1.39536  | -3.65625 |
| C | -1.74483 | -0.87272 | -3.31974 |
| C | 3.80141  | 1.45760  | 3.40494  |
| C | 2.09091  | 3.92017  | 0.48858  |
| C | 1.01694  | 2.85056  | 0.36714  |
| C | -0.30895 | 3.31320  | 0.33915  |
| C | 2.03885  | -3.42562 | -1.18703 |
| C | -1.51168 | 2.60585  | 0.11683  |
| C | -2.72234 | 3.48425  | -0.16962 |
| C | 2.72827  | 1.21165  | -0.00530 |
| C | 3.52223  | 0.64399  | 1.02395  |
| C | 4.81540  | 0.20719  | 0.71391  |
| C | 5.32868  | 0.31408  | -0.57436 |
| C | 3.04864  | -0.92760 | 2.97364  |
| C | 4.54509  | 0.87769  | -1.57845 |
| C | 3.24835  | 1.33985  | -1.32337 |
| C | 3.01608  | 0.52548  | 2.46089  |
| C | 2.42865  | 1.92200  | -2.47943 |
| C | 1.94971  | 0.82228  | -3.44870 |
| C | 3.19474  | 3.00994  | -3.25937 |
| C | -2.85350 | 0.61309  | -0.14990 |
| C | 2.02336  | -2.04056 | -0.94782 |
| C | -3.74556 | 0.33445  | 0.92010  |
| C | -4.92906 | -0.35344 | 0.63336  |
| H | 2.76556  | -1.29788 | -1.19438 |
| H | 0.42708  | -4.88664 | -0.60712 |
| H | -0.65819 | -2.78203 | 0.37999  |
| H | 2.81141  | -4.00534 | -1.66801 |
| H | 1.66306  | 4.85766  | 0.84894  |
| H | 2.56637  | 4.11595  | -0.47645 |
| H | 2.88140  | 3.60610  | 1.17449  |
| H | -0.42459 | 4.38734  | 0.42792  |
| H | -2.74347 | 4.34101  | 0.50957  |
| H | -3.66317 | 2.94159  | -0.09008 |
| H | -2.64751 | 3.88389  | -1.18724 |
| H | 5.43099  | -0.22334 | 1.49931  |
| H | 6.33340  | -0.03553 | -0.79594 |
| H | 4.94847  | 0.95779  | -2.58431 |
| H | 1.97105  | 0.84837  | 2.47118  |
| H | 3.39667  | 1.40408  | 4.42169  |
| H | 3.74996  | 2.50100  | 3.07704  |
| H | 4.86037  | 1.17818  | 3.45241  |
| H | 2.63138  | -0.98332 | 3.98497  |
| H | 4.06991  | -1.32302 | 3.01572  |
| H | 2.45500  | -1.58310 | 2.33151  |
| H | 1.53420  | 2.38664  | -2.05802 |
| H | 1.35212  | 1.25828  | -4.25789 |
| H | 1.33254  | 0.07882  | -2.93707 |
| H | 2.79694  | 0.29970  | -3.90706 |
| H | 2.54026  | 3.47430  | -4.00551 |
| H | 4.05550  | 2.59426  | -3.79440 |
| H | 3.56906  | 3.80127  | -2.60293 |
| H | -5.62450 | -0.56489 | 1.44071  |
| H | -6.16287 | -1.30702 | -0.85349 |
| H | -4.58103 | -0.85501 | -2.69867 |
| H | -2.42238 | 1.08335  | 2.41295  |
| H | -3.34854 | -0.02975 | 4.36967  |
| H | -3.10563 | -1.24613 | 3.10391  |
| H | -4.73236 | -0.64027 | 3.46350  |
| H | -4.10558 | 2.31085  | 3.77738  |
| H | -5.40690 | 1.72655  | 2.73014  |
| H | -4.19500 | 2.84229  | 2.09296  |
| H | -1.30000 | 0.90938  | -2.22792 |
| H | -2.11147 | 1.62429  | -4.45863 |



S113

|    |          |          |          |
|----|----------|----------|----------|
| H  | -3.11895 | 2.33886  | -3.18830 |
| H  | -3.71654 | 0.95990  | -4.11705 |
| H  | -1.01740 | -0.65424 | -4.10970 |
| H  | -2.58564 | -1.40045 | -3.78427 |
| H  | -1.27288 | -1.55613 | -2.60663 |
| N  | 0.89286  | -1.67664 | -0.32942 |
| N  | 0.19006  | -2.82197 | -0.17163 |
| N  | 1.37342  | 1.56510  | 0.26677  |
| N  | -1.61355 | 1.28220  | 0.09699  |
| O  | -1.07032 | -1.15579 | 1.63490  |
| O  | -0.35063 | -1.16701 | 2.70137  |
| Cu | -0.01566 | 0.12761  | 0.43208  |

78. L<sup>1</sup>CuX, X = 1-methylpyrazole

|   |          |          |          |
|---|----------|----------|----------|
| N | -0.03074 | -1.80861 | -0.44075 |
| C | 0.49271  | -4.00634 | -0.54575 |
| C | -0.88115 | -3.87584 | -0.66405 |
| C | 3.14870  | 1.02816  | 1.40192  |
| C | 4.48475  | 0.61492  | 1.43822  |
| C | 5.24062  | 0.49813  | 0.27560  |
| C | 4.65412  | 0.79209  | -0.95170 |
| C | 3.32084  | 1.20588  | -1.04406 |
| C | 2.33966  | 1.08978  | 2.69474  |
| C | 3.04465  | 1.88976  | 3.80466  |
| C | 1.98515  | -0.32915 | 3.18420  |
| C | 2.70498  | 1.46017  | -2.41731 |
| C | 2.52261  | 0.13742  | -3.18953 |
| C | 3.51254  | 2.47139  | -3.25110 |
| C | -3.00789 | 0.41251  | -0.32263 |
| C | -3.62931 | -0.16158 | 0.82109  |
| C | -4.68737 | -1.05875 | 0.63771  |
| C | -5.14477 | -1.39469 | -0.63455 |
| C | -4.54072 | -0.82025 | -1.75046 |
| C | -3.47990 | 0.08497  | -1.62385 |
| C | -3.13241 | 0.14410  | 2.23197  |
| C | -2.38081 | -1.06368 | 2.82822  |
| C | -4.26371 | 0.59755  | 3.17182  |
| C | -2.82866 | 0.66780  | -2.87692 |
| C | -3.84382 | 1.38207  | -3.78725 |
| C | -2.05845 | -0.41195 | -3.66405 |
| C | 1.72802  | 4.02969  | 0.33017  |
| C | 0.72456  | 2.89940  | 0.15464  |
| C | -0.63996 | 3.27729  | 0.09803  |
| C | -1.81399 | 2.50537  | -0.05033 |
| C | -3.13319 | 3.26140  | -0.06645 |
| C | 2.55995  | 1.33329  | 0.14680  |
| H | -1.66656 | -4.60436 | -0.79534 |
| H | -2.05162 | -2.08349 | -0.62251 |
| H | 1.05873  | -4.92487 | -0.56361 |
| H | 1.99222  | -2.33281 | -0.28924 |
| H | 1.23351  | 5.00213  | 0.35610  |
| H | 2.46083  | 4.03278  | -0.48327 |
| H | 2.29509  | 3.90468  | 1.25907  |
| H | -0.81235 | 4.34333  | 0.18412  |
| H | -2.97971 | 4.33623  | 0.04353  |
| H | -3.78781 | 2.92015  | 0.74302  |
| H | -3.67421 | 3.08251  | -1.00201 |
| H | 4.94147  | 0.37576  | 2.39546  |
| H | 6.27849  | 0.17960  | 0.32575  |
| H | 5.24329  | 0.69214  | -1.86013 |
| H | 1.39718  | 1.59584  | 2.47029  |
| H | 2.39164  | 1.98276  | 4.67973  |
| H | 3.30439  | 2.89909  | 3.46890  |

|    |          |          |          |
|----|----------|----------|----------|
| H  | 3.96856  | 1.40432  | 4.13868  |
| H  | 1.37187  | -0.28798 | 4.09209  |
| H  | 2.88950  | -0.90477 | 3.41519  |
| H  | 1.42282  | -0.87735 | 2.42113  |
| H  | 1.70908  | 1.88215  | -2.25968 |
| H  | 2.03903  | 0.31383  | -4.15769 |
| H  | 1.90111  | -0.56412 | -2.62369 |
| H  | 3.48745  | -0.34729 | -3.38030 |
| H  | 2.99860  | 2.68405  | -4.19537 |
| H  | 4.51029  | 2.09258  | -3.50021 |
| H  | 3.64253  | 3.41860  | -2.71754 |
| H  | -5.16177 | -1.50459 | 1.50847  |
| H  | -5.96815 | -2.09354 | -0.75528 |
| H  | -4.90067 | -1.07987 | -2.74314 |
| H  | -2.41374 | 0.96406  | 2.15628  |
| H  | -2.00482 | -0.83160 | 3.83130  |
| H  | -1.52423 | -1.34163 | 2.20592  |
| H  | -3.03820 | -1.93750 | 2.91194  |
| H  | -3.85299 | 0.89300  | 4.14364  |
| H  | -4.99157 | -0.20104 | 3.35488  |
| H  | -4.80808 | 1.45390  | 2.76059  |
| H  | -2.09678 | 1.41085  | -2.55013 |
| H  | -3.32923 | 1.85885  | -4.62892 |
| H  | -4.39386 | 2.15765  | -3.24470 |
| H  | -4.57925 | 0.68557  | -4.20576 |
| H  | -1.58572 | 0.01908  | -4.55387 |
| H  | -2.72706 | -1.21436 | -3.99804 |
| H  | -1.26911 | -0.86024 | -3.05238 |
| C  | 0.98115  | -2.69506 | -0.40629 |
| N  | -1.15214 | -2.55172 | -0.59569 |
| N  | 1.17045  | 1.64729  | 0.07155  |
| N  | -1.82510 | 1.17959  | -0.17425 |
| Cu | -0.11283 | 0.18038  | -0.18760 |

79.  $L^1CuXO_2$   $\eta^1$  singlet, X = 1-methylpyrazole

|   |          |          |          |
|---|----------|----------|----------|
| H | -1.97947 | -2.06421 | -0.71175 |
| H | -1.89690 | -3.83879 | -0.65520 |
| H | -1.60999 | -2.87921 | 0.82715  |
| C | 0.71339  | -3.94469 | -0.93898 |
| C | 3.67822  | 1.65540  | 3.48208  |
| C | 2.86564  | -0.71207 | 3.08438  |
| C | 2.59071  | 1.73842  | -2.52395 |
| C | 2.22771  | 0.56566  | -3.45717 |
| C | 3.34558  | 2.83150  | -3.30410 |
| C | -2.85482 | 0.57179  | -0.13817 |
| C | -3.70987 | 0.23238  | 0.94419  |
| C | -4.89976 | -0.44908 | 0.65989  |
| C | -5.25642 | -0.79298 | -0.64033 |
| C | -4.41612 | -0.44795 | -1.69376 |
| N | 0.69210  | -1.76271 | -0.46922 |
| C | -3.21155 | 0.22950  | -1.47068 |
| C | -3.41215 | 0.62128  | 2.39192  |
| C | -3.43198 | -0.59024 | 3.34325  |
| C | -4.39980 | 1.69601  | 2.89444  |
| C | -2.34557 | 0.62648  | -2.66563 |
| C | -3.04827 | 1.69543  | -3.52786 |
| C | -1.94025 | -0.58239 | -3.52878 |
| C | 2.07953  | 3.95095  | 0.37772  |
| C | 1.03151  | 2.85313  | 0.29675  |
| C | -0.31278 | 3.27196  | 0.33806  |
| C | 2.01587  | -3.49557 | -1.06276 |
| C | -1.51265 | 2.54382  | 0.17774  |
| C | -2.75659 | 3.41892  | 0.06953  |

S115

|    |          |          |          |
|----|----------|----------|----------|
| C  | 2.78236  | 1.23956  | -0.00117 |
| C  | 3.51792  | 0.75788  | 1.11219  |
| C  | 4.82709  | 0.30884  | 0.90520  |
| C  | 5.40686  | 0.31751  | -0.36009 |
| C  | 4.67504  | 0.78935  | -1.44710 |
| C  | 3.36560  | 1.25957  | -1.29590 |
| C  | 2.92095  | 0.72056  | 2.51827  |
| H  | 2.74002  | -1.39533 | -0.73651 |
| H  | 0.27875  | -4.92446 | -1.07236 |
| C  | -1.47345 | -2.91527 | -0.25621 |
| H  | 2.88469  | -4.07182 | -1.33993 |
| H  | 1.63626  | 4.89418  | 0.70183  |
| H  | 2.54799  | 4.11243  | -0.59860 |
| H  | 2.87931  | 3.67972  | 1.07191  |
| H  | -0.45333 | 4.34210  | 0.44185  |
| H  | -2.80918 | 4.10574  | 0.91980  |
| H  | -3.67917 | 2.84310  | 0.02729  |
| H  | -2.69307 | 4.03281  | -0.83583 |
| H  | 5.40039  | -0.05833 | 1.75240  |
| H  | 6.42317  | -0.04089 | -0.49908 |
| H  | 5.12917  | 0.79040  | -2.43467 |
| H  | 1.89125  | 1.08078  | 2.45005  |
| H  | 3.19432  | 1.66225  | 4.46536  |
| H  | 3.70252  | 2.68607  | 3.11258  |
| H  | 4.71513  | 1.33033  | 3.62571  |
| H  | 2.40634  | -0.70775 | 4.07921  |
| H  | 3.86801  | -1.14429 | 3.18531  |
| H  | 2.26895  | -1.37202 | 2.44954  |
| H  | 1.64993  | 2.17159  | -2.17567 |
| H  | 1.65422  | 0.92383  | -4.32025 |
| H  | 1.62432  | -0.18453 | -2.93834 |
| H  | 3.12725  | 0.06861  | -3.83854 |
| H  | 2.72110  | 3.21910  | -4.11680 |
| H  | 4.26704  | 2.44723  | -3.75548 |
| H  | 3.62113  | 3.67258  | -2.65969 |
| H  | -5.56523 | -0.70905 | 1.47836  |
| H  | -6.18851 | -1.31795 | -0.83168 |
| H  | -4.70304 | -0.70144 | -2.71113 |
| H  | -2.40346 | 1.03808  | 2.42375  |
| H  | -3.17763 | -0.26657 | 4.35906  |
| H  | -2.70550 | -1.34901 | 3.04519  |
| H  | -4.42528 | -1.05199 | 3.39117  |
| H  | -4.13929 | 2.00326  | 3.91361  |
| H  | -5.42582 | 1.31102  | 2.91763  |
| H  | -4.39613 | 2.58940  | 2.26394  |
| H  | -1.42570 | 1.06892  | -2.27481 |
| H  | -2.39495 | 2.02422  | -4.34412 |
| H  | -3.31731 | 2.57503  | -2.93484 |
| H  | -3.96931 | 1.30434  | -3.97543 |
| H  | -1.30432 | -0.25901 | -4.36021 |
| H  | -2.81142 | -1.08868 | -3.95955 |
| H  | -1.37645 | -1.31830 | -2.94671 |
| N  | -0.05614 | -2.88991 | -0.58861 |
| C  | 1.94971  | -2.12939 | -0.75770 |
| N  | 1.41190  | 1.58555  | 0.16772  |
| N  | -1.59742 | 1.22005  | 0.07850  |
| O  | -0.42509 | -0.58565 | 2.12643  |
| O  | -0.46011 | -1.83013 | 2.41319  |
| Cu | 0.06379  | 0.09560  | 0.32057  |

80.  $L^1CuXO_2$   $\eta^1$  triplet, X = 1-methylpyrazole

|   |          |          |          |
|---|----------|----------|----------|
| H | -2.11526 | -2.09231 | -0.48917 |
| H | -2.06192 | -3.86407 | -0.32954 |

|   |          |          |          |
|---|----------|----------|----------|
| H | -1.70898 | -2.83084 | 1.08107  |
| C | 0.54536  | -4.02085 | -0.70619 |
| C | 3.73174  | 1.69139  | 3.43701  |
| C | 3.17031  | -0.75093 | 3.08431  |
| C | 2.51630  | 1.68946  | -2.52180 |
| C | 2.21078  | 0.50437  | -3.45985 |
| C | 3.18626  | 2.83389  | -3.30734 |
| C | -2.88552 | 0.61882  | -0.21420 |
| C | -3.75049 | 0.20552  | 0.83291  |
| C | -4.93864 | -0.45601 | 0.49992  |
| C | -5.27880 | -0.72342 | -0.82351 |
| C | -4.41880 | -0.32492 | -1.84271 |
| N | 0.55140  | -1.81706 | -0.33939 |
| C | -3.22111 | 0.34496  | -1.56643 |
| C | -3.43061 | 0.48552  | 2.30079  |
| C | -3.50146 | -0.78140 | 3.17426  |
| C | -4.35455 | 1.57463  | 2.88399  |
| C | -2.31102 | 0.76233  | -2.72088 |
| C | -3.00262 | 1.77157  | -3.65751 |
| C | -1.79698 | -0.45591 | -3.51230 |
| C | 2.09971  | 3.89822  | 0.43899  |
| C | 1.04996  | 2.79908  | 0.35560  |
| C | -0.29181 | 3.23946  | 0.39656  |
| C | 1.84416  | -3.58587 | -0.89766 |
| C | -1.50831 | 2.55420  | 0.18574  |
| C | -2.72386 | 3.46209  | 0.03937  |
| C | 2.80400  | 1.20887  | -0.00198 |
| C | 3.60026  | 0.75044  | 1.07990  |
| C | 4.92246  | 0.36489  | 0.82992  |
| C | 5.46214  | 0.40466  | -0.45194 |
| C | 4.66966  | 0.83714  | -1.51143 |
| C | 3.34552  | 1.24643  | -1.31559 |
| C | 3.05186  | 0.67125  | 2.50269  |
| H | 2.58776  | -1.47310 | -0.69675 |
| H | 0.10213  | -5.00303 | -0.78062 |
| C | -1.60958 | -2.92649 | -0.00240 |
| H | 2.69982  | -4.18004 | -1.17856 |
| H | 1.67586  | 4.81341  | 0.85670  |
| H | 2.48849  | 4.13196  | -0.55794 |
| H | 2.95358  | 3.59331  | 1.04803  |
| H | -0.40658 | 4.31113  | 0.51865  |
| H | -2.72851 | 4.21811  | 0.83029  |
| H | -3.66498 | 2.91428  | 0.07056  |
| H | -2.67577 | 3.99754  | -0.91590 |
| H | 5.54034  | 0.02570  | 1.65745  |
| H | 6.49065  | 0.09933  | -0.62457 |
| H | 5.08896  | 0.86041  | -2.51420 |
| H | 1.98914  | 0.92123  | 2.45742  |
| H | 3.30262  | 1.63623  | 4.44409  |
| H | 3.60565  | 2.71686  | 3.07588  |
| H | 4.80750  | 1.49898  | 3.52244  |
| H | 2.68910  | -0.80404 | 4.06721  |
| H | 4.21681  | -1.04959 | 3.21397  |
| H | 2.68994  | -1.48867 | 2.43497  |
| H | 1.55804  | 2.06010  | -2.14874 |
| H | 1.59174  | 0.83010  | -4.30418 |
| H | 1.67281  | -0.29101 | -2.93544 |
| H | 3.13162  | 0.07327  | -3.86969 |
| H | 2.52288  | 3.19070  | -4.10339 |
| H | 4.11981  | 2.50951  | -3.78063 |
| H | 3.42417  | 3.68425  | -2.66045 |
| H | -5.61257 | -0.76521 | 1.29453  |
| H | -6.20711 | -1.23728 | -1.05809 |
| H | -4.68344 | -0.53370 | -2.87643 |

|    |          |          |          |
|----|----------|----------|----------|
| H  | -2.40423 | 0.85877  | 2.34637  |
| H  | -3.18427 | -0.55279 | 4.19763  |
| H  | -2.84992 | -1.57340 | 2.79521  |
| H  | -4.51940 | -1.18303 | 3.23062  |
| H  | -4.08537 | 1.79080  | 3.92420  |
| H  | -5.40173 | 1.25080  | 2.87049  |
| H  | -4.28822 | 2.50839  | 2.31923  |
| H  | -1.43796 | 1.25834  | -2.28900 |
| H  | -2.31141 | 2.10921  | -4.43815 |
| H  | -3.34821 | 2.65278  | -3.10783 |
| H  | -3.87298 | 1.32906  | -4.15545 |
| H  | -1.11904 | -0.13781 | -4.31225 |
| H  | -2.61848 | -1.01422 | -3.97600 |
| H  | -1.24562 | -1.14394 | -2.86330 |
| N  | -0.20518 | -2.94399 | -0.37925 |
| C  | 1.79510  | -2.20543 | -0.65557 |
| N  | 1.43125  | 1.53288  | 0.20640  |
| N  | -1.63107 | 1.23280  | 0.07910  |
| O  | -0.18769 | -0.45870 | 2.40729  |
| O  | -0.17027 | -1.63246 | 2.80068  |
| Cu | -0.00668 | 0.08410  | 0.20029  |

81.  $L^1CuXO_2$   $\eta^2$  singlet, X = 1-methylpyrazole

|   |          |          |          |
|---|----------|----------|----------|
| H | -1.67156 | -3.07524 | 0.75530  |
| H | -2.02592 | -2.43244 | -0.85978 |
| H | -1.93818 | -4.19361 | -0.62097 |
| C | 0.69470  | -4.30367 | -0.80156 |
| C | 3.85088  | 1.64735  | 3.62438  |
| C | 3.35545  | -0.82678 | 3.45694  |
| C | 2.37646  | 1.53958  | -2.22698 |
| C | 2.00970  | 0.38611  | -3.18127 |
| C | 3.06667  | 2.67270  | -3.01393 |
| C | -2.77264 | 0.49270  | -0.02407 |
| C | -3.63864 | 0.09831  | 1.03089  |
| C | -4.82040 | -0.57486 | 0.70163  |
| C | -5.14847 | -0.86668 | -0.61926 |
| C | -4.28934 | -0.47846 | -1.64131 |
| N | 0.60398  | -2.06819 | -0.63028 |
| C | -3.09485 | 0.20302  | -1.37289 |
| C | -3.35227 | 0.42599  | 2.49669  |
| C | -3.51902 | -0.79213 | 3.42343  |
| C | -4.23659 | 1.58968  | 2.99270  |
| C | -2.20719 | 0.62676  | -2.54264 |
| C | -2.93266 | 1.62823  | -3.46481 |
| C | -1.70425 | -0.58225 | -3.35451 |
| C | 2.15374  | 3.76929  | 0.59659  |
| C | 1.06178  | 2.71518  | 0.57997  |
| C | -0.25793 | 3.19636  | 0.54941  |
| C | 1.99015  | -3.84052 | -0.93184 |
| C | -1.44911 | 2.48565  | 0.30357  |
| C | -2.66531 | 3.34569  | 0.00276  |
| C | 2.75074  | 1.02639  | 0.28979  |
| C | 3.58554  | 0.57271  | 1.34266  |
| C | 4.88330  | 0.15203  | 1.02737  |
| C | 5.35686  | 0.16299  | -0.27993 |
| C | 4.53003  | 0.61251  | -1.30478 |
| C | 3.22710  | 1.05436  | -1.05040 |
| C | 3.13940  | 0.55222  | 2.80347  |
| H | 2.65435  | -1.69758 | -0.85587 |
| H | 0.28492  | -5.30317 | -0.82099 |
| C | -1.52221 | -3.23175 | -0.31434 |
| H | 2.88242  | -4.42476 | -1.09718 |
| H | 1.76200  | 4.71450  | 0.97648  |

S118

|    |          |          |          |
|----|----------|----------|----------|
| H  | 2.53674  | 3.94650  | -0.41320 |
| H  | 2.99949  | 3.45865  | 1.21276  |
| H  | -0.36367 | 4.27317  | 0.59626  |
| H  | -2.65218 | 4.24300  | 0.62675  |
| H  | -3.60371 | 2.81501  | 0.15855  |
| H  | -2.63491 | 3.67497  | -1.04203 |
| H  | 5.53414  | -0.19203 | 1.82602  |
| H  | 6.36608  | -0.17487 | -0.49931 |
| H  | 4.90287  | 0.62165  | -2.32535 |
| H  | 2.06744  | 0.75653  | 2.83140  |
| H  | 3.49865  | 1.63376  | 4.66209  |
| H  | 3.66420  | 2.64845  | 3.22235  |
| H  | 4.93593  | 1.49233  | 3.63911  |
| H  | 2.91935  | -0.83593 | 4.46169  |
| H  | 4.42034  | -1.06649 | 3.55925  |
| H  | 2.87720  | -1.61811 | 2.87600  |
| H  | 1.43984  | 1.93652  | -1.82934 |
| H  | 1.40630  | 0.76082  | -4.01649 |
| H  | 1.43757  | -0.39048 | -2.66940 |
| H  | 2.90776  | -0.07835 | -3.60501 |
| H  | 2.38575  | 3.07693  | -3.77134 |
| H  | 3.96075  | 2.31595  | -3.53709 |
| H  | 3.37562  | 3.49729  | -2.36389 |
| H  | -5.49806 | -0.87302 | 1.49634  |
| H  | -6.07215 | -1.39068 | -0.84999 |
| H  | -4.55140 | -0.70228 | -2.67191 |
| H  | -2.30925 | 0.74011  | 2.57005  |
| H  | -3.20531 | -0.52947 | 4.43969  |
| H  | -2.90228 | -1.62911 | 3.08985  |
| H  | -4.56126 | -1.12620 | 3.48188  |
| H  | -4.00593 | 1.82362  | 4.03818  |
| H  | -5.29967 | 1.32876  | 2.93584  |
| H  | -4.08646 | 2.50070  | 2.40627  |
| H  | -1.32704 | 1.12694  | -2.13011 |
| H  | -2.25579 | 1.98738  | -4.24809 |
| H  | -3.30189 | 2.49741  | -2.91189 |
| H  | -3.79333 | 1.16460  | -3.96019 |
| H  | -1.07990 | -0.24705 | -4.18983 |
| H  | -2.53551 | -1.15869 | -3.77607 |
| H  | -1.10063 | -1.25037 | -2.73483 |
| N  | -0.10492 | -3.22317 | -0.62814 |
| C  | 1.87541  | -2.44401 | -0.81398 |
| N  | 1.39856  | 1.42456  | 0.55402  |
| N  | -1.54145 | 1.15953  | 0.28406  |
| O  | -0.71649 | -1.23558 | 1.99295  |
| O  | 0.60442  | -1.12220 | 2.20372  |
| Cu | -0.00419 | 0.11593  | 0.89422  |

82.  $L^1CuXO_2$   $\eta^2$  triplet, X = 1-methylpyrazole

|   |          |          |          |
|---|----------|----------|----------|
| H | -1.62609 | -3.17095 | 0.85874  |
| H | -1.87755 | -2.19947 | -0.60621 |
| H | -1.81078 | -3.97098 | -0.72918 |
| C | 0.82728  | -4.09831 | -0.75756 |
| C | 3.83482  | 1.51105  | 3.61833  |
| C | 3.32531  | -0.93924 | 3.25189  |
| C | 2.43333  | 1.56606  | -2.30865 |
| C | 2.12580  | 0.38284  | -3.24856 |
| C | 3.06343  | 2.72410  | -3.10652 |
| C | -2.81595 | 0.49485  | 0.00952  |
| C | -3.70154 | 0.11870  | 1.05327  |
| C | -4.87564 | -0.56540 | 0.71723  |
| C | -5.18332 | -0.88502 | -0.60214 |
| C | -4.30799 | -0.51297 | -1.61827 |

|   |          |          |          |
|---|----------|----------|----------|
| N | 0.75023  | -1.92059 | -0.25555 |
| C | -3.12032 | 0.17432  | -1.34052 |
| C | -3.43289 | 0.47503  | 2.51506  |
| C | -3.65229 | -0.71287 | 3.47157  |
| C | -4.29208 | 1.67358  | 2.96872  |
| C | -2.20997 | 0.58850  | -2.49704 |
| C | -2.89820 | 1.62512  | -3.40756 |
| C | -1.72825 | -0.61524 | -3.32840 |
| C | 2.15514  | 3.75312  | 0.62588  |
| C | 1.08002  | 2.67918  | 0.55481  |
| C | -0.24570 | 3.14948  | 0.56305  |
| C | 2.12996  | -3.63597 | -0.78276 |
| C | -1.45904 | 2.45937  | 0.34857  |
| C | -2.66313 | 3.35792  | 0.10222  |
| C | 2.80377  | 1.06137  | 0.20209  |
| C | 3.63881  | 0.59881  | 1.25323  |
| C | 4.95761  | 0.23451  | 0.95414  |
| C | 5.45571  | 0.30366  | -0.34254 |
| C | 4.62562  | 0.74063  | -1.37095 |
| C | 3.30216  | 1.12567  | -1.12863 |
| C | 3.14570  | 0.48588  | 2.69530  |
| H | 2.80831  | -1.53471 | -0.37977 |
| H | 0.41196  | -5.07811 | -0.94330 |
| C | -1.40863 | -3.09962 | -0.20931 |
| H | 3.02289  | -4.19631 | -1.01297 |
| H | 1.72675  | 4.71142  | 0.92486  |
| H | 2.64287  | 3.88761  | -0.34426 |
| H | 2.93966  | 3.48105  | 1.33647  |
| H | -0.34944 | 4.22529  | 0.64534  |
| H | -2.68570 | 4.16831  | 0.83676  |
| H | -3.60884 | 2.81899  | 0.13994  |
| H | -2.57582 | 3.82398  | -0.88605 |
| H | 5.60605  | -0.10904 | 1.75571  |
| H | 6.48333  | 0.01828  | -0.55124 |
| H | 5.01359  | 0.78414  | -2.38535 |
| H | 2.07521  | 0.70554  | 2.69618  |
| H | 3.44000  | 1.43486  | 4.63785  |
| H | 3.67613  | 2.53818  | 3.27481  |
| H | 4.91683  | 1.34145  | 3.66775  |
| H | 2.88749  | -1.01276 | 4.25304  |
| H | 4.38385  | -1.21141 | 3.33289  |
| H | 2.83023  | -1.67869 | 2.61734  |
| H | 1.47892  | 1.91942  | -1.91040 |
| H | 1.48733  | 0.70715  | -4.07865 |
| H | 1.61050  | -0.42288 | -2.71952 |
| H | 3.04488  | -0.03074 | -3.67947 |
| H | 2.37532  | 3.06484  | -3.88826 |
| H | 3.99260  | 2.41784  | -3.59988 |
| H | 3.29705  | 3.58237  | -2.46907 |
| H | -5.56439 | -0.85153 | 1.50717  |
| H | -6.10267 | -1.41488 | -0.83673 |
| H | -4.55395 | -0.75321 | -2.64954 |
| H | -2.38255 | 0.76831  | 2.59126  |
| H | -3.33205 | -0.44038 | 4.48330  |
| H | -3.07440 | -1.58568 | 3.16004  |
| H | -4.70849 | -0.99972 | 3.53331  |
| H | -4.07005 | 1.92934  | 4.01110  |
| H | -5.36025 | 1.43598  | 2.90344  |
| H | -4.11149 | 2.56372  | 2.36004  |
| H | -1.32279 | 1.06078  | -2.06679 |
| H | -2.20861 | 1.97316  | -4.18503 |
| H | -3.23652 | 2.49679  | -2.83953 |
| H | -3.77400 | 1.19724  | -3.90902 |
| H | -1.06866 | -0.28024 | -4.13645 |

S120

|    |          |          |          |
|----|----------|----------|----------|
| H  | -2.56472 | -1.15347 | -3.78825 |
| H  | -1.16451 | -1.32512 | -2.71597 |
| N  | 0.02560  | -3.05468 | -0.44229 |
| C  | 2.02722  | -2.27414 | -0.46134 |
| N  | 1.43680  | 1.39448  | 0.45962  |
| N  | -1.57498 | 1.13750  | 0.30820  |
| O  | -0.84574 | -1.23785 | 2.07199  |
| O  | 0.12606  | -1.23417 | 2.89582  |
| Cu | 0.02796  | -0.03456 | 0.63923  |

83. L<sup>1</sup>CuX, X = tetrazole

|   |               |               |               |
|---|---------------|---------------|---------------|
| C | 2.9716867626  | 1.5510939131  | 3.7919050819  |
| C | 1.9707378363  | -.6539204303  | 3.0374406041  |
| C | 2.5191846018  | 1.3875398339  | -2.4493066479 |
| C | 2.1647615525  | .0535111239   | -3.1381115660 |
| C | 3.3493054128  | 2.2811476927  | -3.3863958044 |
| C | -3.1171937306 | .1746408988   | -.3950762125  |
| C | -3.7736215213 | -.3768122796  | .7424483001   |
| C | -4.8018470875 | -1.3060872879 | .5493064531   |
| C | -5.1990283602 | -1.7017607032 | -.7263910681  |
| C | -4.5711329364 | -1.1437318353 | -1.8383155963 |
| N | -.0326541074  | -4.1879695805 | -.2699531868  |
| C | -3.5404672274 | -.2015451615  | -1.7031918874 |
| C | -3.3400421650 | -.0162025432  | 2.1615928004  |
| C | -2.6113284197 | -1.1934622700 | 2.8411431265  |
| C | -4.5171172958 | .4666894795   | 3.0285160148  |
| C | -2.8917092195 | .3885004093   | -2.9552773030 |
| C | -3.9237728476 | 1.1050862067  | -3.8471719289 |
| C | -2.1253961383 | -.6759509796  | -3.7658429495 |
| C | 1.5723816734  | 3.8408380770  | .3317304753   |
| C | .5863624520   | 2.6982430836  | .1485786188   |
| C | -.7837444163  | 3.0553907470  | .0773144531   |
| C | -1.2887537699 | -3.9698968281 | -.6208426320  |
| C | -1.9429934405 | 2.2712001769  | -.0975859270  |
| C | -3.2709594999 | 3.0109610115  | -.1362993905  |
| C | 2.4564176123  | 1.1770073584  | .1070330454   |
| C | 3.0733177986  | .8426422041   | 1.3365423272  |
| C | 4.4223397393  | .4711029896   | 1.3298983278  |
| C | 5.1567098433  | .4257733088   | .1490019700   |
| C | 4.5380914783  | .7474590441   | -1.0556095345 |
| N | .5233382547   | -2.9709860762 | -.0930173357  |
| C | 3.1924656539  | 1.1248563705  | -1.1037074168 |
| C | 2.2788054076  | .8041498107   | 2.6393234375  |
| H | -2.0326110666 | -4.7186908742 | -.8439235652  |
| H | -2.3358690908 | -2.0992270712 | -.8848970922  |
| H | 1.0620554591  | 4.8036857864  | .3868880215   |
| H | 2.2891164538  | 3.8722020511  | -.4955589044  |
| H | 2.1590009865  | 3.7031038816  | 1.2462662794  |
| H | -.9725502161  | 4.1180526846  | .1695343968   |
| H | -3.1350575475 | 4.0879783936  | -.0249233786  |
| H | -3.9342675622 | 2.6619383814  | .6627113198   |
| H | -3.7926331082 | 2.8240726052  | -1.0814965205 |
| H | 4.9044585997  | .2016282551   | 2.2657183472  |
| H | 6.2023776423  | .1308770486   | .1654216173   |
| H | 5.1101671814  | .6946595022   | -1.9778755076 |
| H | 1.3207683700  | 1.2997893167  | 2.4573530413  |
| H | 2.3274868643  | 1.5639426120  | 4.6781755339  |
| H | 3.1952200690  | 2.5884431290  | 3.5216286116  |
| H | 3.9138397662  | 1.0737630438  | 4.0827789090  |
| H | 1.3509736781  | -.6891950477  | 3.9412242340  |
| H | 2.8938118002  | -1.2093524102 | 3.2391329336  |
| H | 1.4407469769  | -1.1795446056 | 2.2366816565  |
| H | 1.5774047519  | 1.9076294439  | -2.2533792109 |



S121

|    |               |               |               |
|----|---------------|---------------|---------------|
| H  | 1.6246498942  | .2279934025   | -4.0763090221 |
| H  | 1.5351026695  | -.5665645025  | -2.4912058428 |
| H  | 3.0688848675  | -.5214020498  | -3.3691298842 |
| H  | 2.7785375667  | 2.5122895519  | -4.2928619941 |
| H  | 4.2781501288  | 1.7954545025  | -3.7050812867 |
| H  | 3.6174355342  | 3.2278665092  | -2.9058272603 |
| H  | -5.2934067331 | -1.7398611573 | 1.4162930090  |
| H  | -5.9942636288 | -2.4311163764 | -.8531278210  |
| H  | -4.8888089615 | -1.4415051460 | -2.8345114170 |
| H  | -2.6232920495 | .8056248622   | 2.0874385190  |
| H  | -2.2899968436 | -.9175199822  | 3.8517359467  |
| H  | -1.7201326901 | -1.4873272829 | 2.2781895452  |
| H  | -3.2643462594 | -2.0701600954 | 2.9267394840  |
| H  | -4.1547047349 | .8014460284   | 4.0065931724  |
| H  | -5.2485466780 | -.3294249778  | 3.2073037184  |
| H  | -5.0451925465 | 1.3029654393  | 2.5591592674  |
| H  | -2.1618021056 | 1.1319581228  | -2.6247493557 |
| H  | -3.4243134208 | 1.5988741837  | -4.6878245977 |
| H  | -4.4770113350 | 1.8663149417  | -3.2878691354 |
| H  | -4.6554845342 | .4047347803   | -4.2657243120 |
| H  | -1.6750804454 | -.2299058051  | -4.6596033891 |
| H  | -2.7897461438 | -1.4826205242 | -4.0986473286 |
| H  | -1.3153462316 | -1.1211313350 | -3.1792881884 |
| N  | -.3513184170  | -2.0341101248 | -.3218576518  |
| N  | -1.5057624533 | -2.6484832549 | -.6569080649  |
| N  | 1.0544346784  | 1.4555386826  | .0614021267   |
| N  | -1.9415806392 | .9442959468   | -.2291123986  |
| Cu | -.1747265856  | -.0238446150  | -.1409479424  |

84.  $L^1CuXO_2$   $\eta^1$  singlet, X = tetrazole

|   |               |               |               |
|---|---------------|---------------|---------------|
| C | .5867919612   | -3.7867015206 | -.8171956685  |
| C | -5.2270765722 | -.8618318145  | -.6653863800  |
| C | -4.2732278305 | -.6990465593  | -1.6657346642 |
| C | -3.0621408656 | -.0488703262  | -1.4158538739 |
| C | -3.5686848806 | .7865383876   | 2.3546716675  |
| C | -3.7705161690 | -.3283246862  | 3.4000043600  |
| C | -4.4956741020 | 1.9759913140  | 2.6858097474  |
| C | -2.0678165884 | .1381248975   | -2.5590285487 |
| C | -2.5528154242 | 1.2183454520  | -3.5489912270 |
| C | -1.7813565802 | -1.1770760506 | -3.3071317479 |
| C | 3.8171672215  | 1.1512823432  | 3.4824279416  |
| C | 2.0156327445  | 3.9255591828  | .4678531128   |
| C | .9630397746   | 2.8347474287  | .3963037979   |
| C | -.3782204084  | 3.2593751297  | .3710890161   |
| N | 1.5608279134  | -3.3096562305 | -1.5835541170 |
| C | -1.5546012893 | 2.5161209241  | .1386788213   |
| C | -2.7775906983 | 3.3532376781  | -.2066712202  |
| C | 2.6829629008  | 1.1856095229  | .0266865304   |
| C | 3.4678559371  | .5711841906   | 1.0349284477  |
| C | 4.7535243329  | .1315574492   | .7058301810   |
| C | 5.2602005194  | .2775950087   | -.5808755417  |
| C | 2.8528058418  | -1.1059037528 | 2.8379042988  |
| C | 4.4777036063  | .8716139596   | -1.5658220840 |
| C | 3.1867777283  | 1.3337052165  | -1.2964052037 |
| C | 2.9553012563  | .3852829862   | 2.4610706559  |
| C | 2.3624570609  | 1.9146482233  | -2.4483124238 |
| C | 1.9899955481  | .8259236069   | -3.4757322177 |
| C | 3.0819881590  | 3.0759339683  | -3.1640460191 |
| C | -2.8297427367 | .4759104729   | -.1133249527  |
| N | 1.6062084482  | -1.9844177481 | -1.3374271366 |
| C | -3.7812412114 | .2792777838   | .9283788355   |
| C | -4.9733063481 | -.3824837606  | .6150349154   |
| H | .2763783190   | -4.8187450916 | -.7557601238  |

|    |               |               |               |
|----|---------------|---------------|---------------|
| H  | - .7374256056 | -2.6700022876 | .6265914290   |
| H  | 1.5862294564  | 4.8469378645  | .8657394939   |
| H  | 2.4231722800  | 4.1436461942  | -.5227170747  |
| H  | 2.8518246961  | 3.6173885675  | 1.1005292064  |
| H  | -.5224649245  | 4.3324371564  | .4166926060   |
| H  | -2.8514055082 | 4.2153488517  | .4611546456   |
| H  | -3.7058827284 | 2.7877359164  | -.1670647905  |
| H  | -2.6625702465 | 3.7424774857  | -1.2251525892 |
| H  | 5.3661530972  | -.3377087045  | 1.4707745219  |
| H  | 6.2581643925  | -.0793139521  | -.8194259501  |
| H  | 4.8724857285  | .9626680164   | -2.5739490401 |
| H  | 1.9473627489  | .8081756421   | 2.5117099125  |
| H  | 3.3962260633  | 1.0525342304  | 4.4891749619  |
| H  | 3.8693358369  | 2.2180259585  | 3.2404443902  |
| H  | 4.8429099368  | .7671941824   | 3.5123649116  |
| H  | 2.4443327806  | -1.2184758717 | 3.8482434193  |
| H  | 3.8343852071  | -1.5920064874 | 2.8162805189  |
| H  | 2.1970741076  | -1.6452125044 | 2.1485192495  |
| H  | 1.4263100800  | 2.3052953544  | -2.0408923580 |
| H  | 1.3390868982  | 1.2450988732  | -4.2527802063 |
| H  | 1.4815814144  | -.0150752883  | -3.0006193287 |
| H  | 2.8836187669  | .4284555151   | -3.9701304956 |
| H  | 2.4227499586  | 3.5227887899  | -3.9167177707 |
| H  | 3.9819236742  | 2.7309531830  | -3.6847948748 |
| H  | 3.3884861346  | 3.8669325581  | -2.4724220670 |
| H  | -5.7162834171 | -.5269447609  | 1.3935289874  |
| H  | -6.1645308504 | -1.3662930474 | -.8833927192  |
| H  | -4.4767115757 | -1.0776133056 | -2.6634388414 |
| H  | -2.5325543649 | 1.1233117505  | 2.4368113044  |
| H  | -3.4815867505 | .0371586154   | 4.3916786424  |
| H  | -3.1673353873 | -1.2037298785 | 3.1578054024  |
| H  | -4.8210979176 | -.6354035367  | 3.4615352323  |
| H  | -4.3171304582 | 2.3188530514  | 3.7110185424  |
| H  | -5.5493289360 | 1.6829454447  | 2.6137177325  |
| H  | -4.3433187382 | 2.8281572493  | 2.0190920788  |
| H  | -1.1244479352 | .4841587187   | -2.1277852848 |
| H  | -1.8139484731 | 1.3728072079  | -4.3433501333 |
| H  | -2.7193623665 | 2.1787832833  | -3.0515569039 |
| H  | -3.4964463872 | .9239864827   | -4.0228504465 |
| H  | -.9896199597  | -1.0249007473 | -4.0478758496 |
| H  | -2.6643862943 | -1.5429930077 | -3.8428500523 |
| H  | -1.4558942609 | -1.9652649145 | -2.6223530257 |
| N  | .6957928457   | -1.6637972712 | -.4652309465  |
| N  | .0371231203   | -2.7847749190 | -.1223640426  |
| N  | 1.3401994142  | 1.5592046801  | .3346101710   |
| N  | -1.6205215425 | 1.1879446218  | .1234876720   |
| O  | -.8092973914  | -.9460685093  | 1.9243777001  |
| O  | -1.6098273363 | -1.9508800932 | 1.6325882942  |
| Cu | .0061189094   | .1698175309   | .6274350839   |

85.  $L^1CuXO_2$   $\eta^1$  triplet, X = tetrazole

|   |               |               |               |
|---|---------------|---------------|---------------|
| C | 1.2269738870  | -3.6047876902 | -1.1927239478 |
| C | -5.3631371083 | -.8645349549  | -.0213883537  |
| C | -4.5862020699 | -.7966245661  | -1.1739809387 |
| C | -3.3751443494 | -.0997720019  | -1.1920179538 |
| C | -3.3142339238 | 1.1440858157  | 2.4964183658  |
| C | -3.1570416383 | .1129620783   | 3.6324993144  |
| C | -4.3106537313 | 2.2430342095  | 2.9217629259  |
| C | -2.5633310500 | -.0388536758  | -2.4834459034 |
| C | -3.2203771929 | .9054259677   | -3.5099439367 |
| C | -2.3262638704 | -1.4315376972 | -3.0962751032 |
| C | 2.8342048172  | 1.1688283110  | 3.5358045864  |
| C | 1.9939572136  | 3.8599281869  | .5450562171   |

|   |               |               |               |
|---|---------------|---------------|---------------|
| C | .9330525192   | 2.7961725857  | .3123571784   |
| C | -.3913760754  | 3.2706438761  | .2284980331   |
| N | 1.6128434095  | -2.9531009418 | -2.2850409079 |
| C | -1.6002661014 | 2.5749708612  | .0367817851   |
| C | -2.8279337007 | 3.4553110999  | -.1461430167  |
| C | 2.6343094745  | 1.0905277534  | .0907984514   |
| C | 3.1875249098  | .3485242422   | 1.1699947450  |
| C | 4.4901432231  | -.1429555128  | 1.0453552651  |
| C | 5.2338062768  | .0647183379   | -.1124361474  |
| C | 2.5568094714  | -1.2972058728 | 3.0297939528  |
| C | 4.6792160721  | .7832046558   | -1.1655472688 |
| C | 3.3852571201  | 1.3115634191  | -1.0946486142 |
| C | 2.4191474794  | .1307630135   | 2.4725987212  |
| C | 2.8412834076  | 2.0739521181  | -2.3040072438 |
| C | 2.6822595812  | 1.1590691260  | -3.5353505621 |
| C | 3.7281416846  | 3.2844946282  | -2.6626534975 |
| C | -2.9559303740 | .5666998829   | -.0098289971  |
| N | 1.3095302250  | -1.6628684461 | -2.0670219198 |
| C | -3.7300402909 | .4868739999   | 1.1801306579  |
| C | -4.9297987180 | -.2318737966  | 1.1388619431  |
| H | 1.3183445628  | -4.6663880452 | -1.0228847468 |
| H | .1904123854   | -2.7756882995 | .6530787819   |
| H | 1.6131665044  | 4.6208131233  | 1.2312076098  |
| H | 2.2503374025  | 4.3629200154  | -.3923939611  |
| H | 2.9097832550  | 3.4343228767  | .9572786497   |
| H | -.4945909116  | 4.3479931679  | .3015305504   |
| H | -2.9207013821 | 4.1674384892  | .6785974470   |
| H | -3.7488987551 | 2.8793386426  | -.2200852666  |
| H | -2.7107876401 | 4.0395105351  | -1.0657994345 |
| H | 4.9299636041  | -.6996700942  | 1.8673466018  |
| H | 6.2409837584  | -.3347989288  | -.1936974437  |
| H | 5.2615184836  | .9324772010   | -2.0704302794 |
| H | 1.3567836286  | .2935467774   | 2.2669591733  |
| H | 2.2593089686  | 1.0276962912  | 4.4580571724  |
| H | 2.6640191647  | 2.1918618860  | 3.1859813429  |
| H | 3.8979134557  | 1.0723209533  | 3.7821765849  |
| H | 1.8819723813  | -1.4336539502 | 3.8808855448  |
| H | 3.5727594792  | -1.5090064895 | 3.3808724463  |
| H | 2.2981317363  | -2.0473974181 | 2.2768952621  |
| H | 1.8457442899  | 2.4498706447  | -2.0528748414 |
| H | 2.2508740153  | 1.7231775916  | -4.3707338594 |
| H | 2.0396780492  | .3038014424   | -3.3191751133 |
| H | 3.6527100627  | .7712541019   | -3.8658955919 |
| H | 3.2630194049  | 3.8731902060  | -3.4611768896 |
| H | 4.7104996579  | 2.9632721969  | -3.0259615616 |
| H | 3.8962949014  | 3.9444738566  | -1.8063354202 |
| H | -5.5344535444 | -.3012280006  | 2.0387474837  |
| H | -6.3009688511 | -1.4132603052 | -.0263593578  |
| H | -4.9277003467 | -1.2933309991 | -2.0777370860 |
| H | -2.3373747723 | 1.6129212516  | 2.3494304393  |
| H | -2.8089955061 | .6112524787   | 4.5449321526  |
| H | -2.4355762676 | -.6586864382  | 3.3597421605  |
| H | -4.1109953130 | -.3720812364  | 3.8686973920  |
| H | -3.9588025169 | 2.7451354922  | 3.8299208583  |
| H | -5.2958715660 | 1.8173751649  | 3.1425389833  |
| H | -4.4461481134 | 3.0025277488  | 2.1471300241  |
| H | -1.5826367650 | .3805719953   | -2.2404120712 |
| H | -2.6115736091 | .9713828204   | -4.4186637807 |
| H | -3.3370944088 | 1.9162770351  | -3.1058729617 |
| H | -4.2150652849 | .5452710694   | -3.7969384089 |
| H | -1.6393017268 | -1.3599565867 | -3.9458730666 |
| H | -3.2553915280 | -1.8828277514 | -3.4614104523 |
| H | -1.8878252239 | -2.1181793772 | -2.3655658166 |
| N | .7664215212   | -1.5299717406 | -.8904542514  |

|                                               |               |               |               |
|-----------------------------------------------|---------------|---------------|---------------|
| N                                             | .7041173161   | -2.7396968477 | -.3185906844  |
| N                                             | 1.2761464271  | 1.5176123978  | .1912683104   |
| N                                             | -1.7021970870 | 1.2496554846  | -.0272197591  |
| O                                             | -.9873145038  | -1.1434589785 | 1.5195129873  |
| O                                             | -.5976454382  | -2.3588558038 | 1.8147531723  |
| Cu                                            | -.1090256740  | .0951508396   | .0810474157   |
| 86. L <sup>1</sup> CuX, X = N-methyltetrazole |               |               |               |
| C                                             | 3.0179007772  | 1.0178837926  | 3.8552802592  |
| C                                             | 1.9794981464  | -1.1324357568 | 3.0053576059  |
| C                                             | 2.9627280990  | 1.1915359676  | -2.3810516584 |
| C                                             | 3.0340607725  | .0268312946   | -3.3890457622 |
| C                                             | 3.6831607148  | 2.4308614119  | -2.9452692859 |
| C                                             | -2.9589363793 | .1417445456   | -.2899746957  |
| C                                             | -3.6357124307 | -.2134912407  | .9089200603   |
| C                                             | -4.7890836941 | -1.0014190094 | .8241333408   |
| C                                             | -5.2894198385 | -1.4303326250 | -.4032309965  |
| C                                             | -4.6320914918 | -1.0629753901 | -1.5740254514 |
| C                                             | -3.4728290201 | -.2776830021  | -1.5454428016 |
| C                                             | -3.1038483275 | .2082867506   | 2.2786743374  |
| C                                             | -2.3749225900 | -.9561972830  | 2.9786216614  |
| C                                             | -4.1990473225 | .7880273940   | 3.1916529513  |
| C                                             | -2.7812012084 | .0980141810   | -2.8547183184 |
| C                                             | -3.7112702689 | .8885847706   | -3.7941311596 |
| C                                             | -2.2112433767 | -1.1409071036 | -3.5728016966 |
| C                                             | 1.9403899560  | 3.4980166310  | .5477212147   |
| C                                             | .9149552903   | 2.4250627400  | .2160352200   |
| C                                             | -.4323634393  | 2.8579693004  | .1180007702   |
| C                                             | .4988633819   | -4.3286104433 | -.9271716602  |
| C                                             | -1.6277362713 | 2.1395071779  | -.0756507243  |
| C                                             | -2.9092291383 | 2.9587257372  | -.1073287035  |
| C                                             | 2.6942443836  | .8068513083   | .1543563934   |
| C                                             | 3.2177420152  | .3659676071   | 1.3949006581  |
| C                                             | 4.5430051799  | -.0786438706  | 1.4476774078  |
| C                                             | 5.3498258772  | -.0890536633  | .3146098723   |
| C                                             | 4.8253052649  | .3387755347   | -.9007506165  |
| C                                             | 3.5030338085  | .7818179209   | -1.0111235057 |
| C                                             | 2.3555334301  | .3207008309   | 2.6536835114  |
| H                                             | -1.5740191803 | -3.2921574370 | 1.1289962122  |
| H                                             | -2.1683215370 | -2.4518365571 | -.3256475797  |
| H                                             | -2.1216423936 | -4.2332991944 | -.2871102860  |
| H                                             | .2019058559   | -5.3659907017 | -.8934492931  |
| C                                             | -1.6215789197 | -3.3207380936 | .0393492251   |
| H                                             | 1.4976713657  | 4.4950923100  | .5207760977   |
| H                                             | 2.7848901506  | 3.4676856552  | -.1455597100  |
| H                                             | 2.3535545467  | 3.3322862816  | 1.5493377976  |
| H                                             | -.5663805759  | 3.9268189292  | .2313441405   |
| H                                             | -2.6956207515 | 4.0281451700  | -.0703292280  |
| H                                             | -3.5622820640 | 2.7100487843  | .7358142845   |
| H                                             | -3.4806549565 | 2.7494114590  | -1.0178624024 |
| H                                             | 4.9508105531  | -.4267651833  | 2.3933276456  |
| H                                             | 6.3775670993  | -.4365886382  | .3766236655   |
| H                                             | 5.4524580651  | .3167944848   | -1.7886093638 |
| H                                             | 1.4245847655  | .8518998976   | 2.4367454056  |
| H                                             | 2.3343490031  | 1.0373224225  | 4.7117426144  |
| H                                             | 3.2904570313  | 2.0510056464  | 3.6163384581  |
| H                                             | 3.9291405893  | .5016976513   | 4.1771651405  |
| H                                             | 1.3247618422  | -1.1667768712 | 3.8842408554  |
| H                                             | 2.8717001660  | -1.7301833936 | 3.2245551726  |
| H                                             | 1.4572917390  | -1.6107726803 | 2.1700153002  |
| H                                             | 1.9075640631  | 1.4495870613  | -2.2542279341 |
| H                                             | 2.5585120470  | .3102294145   | -4.3358211277 |
| H                                             | 2.5341211673  | -.8629333581  | -2.9988829949 |
| H                                             | 4.0718919581  | -.2472044764  | -3.6116531135 |
| H                                             | 3.2479991974  | 2.7217189437  | -3.9083397044 |

|    |               |               |               |
|----|---------------|---------------|---------------|
| H  | 4.7483437793  | 2.2328777997  | -3.1109845792 |
| H  | 3.6073722463  | 3.2895053719  | -2.2705813705 |
| H  | -5.3075709622 | -1.2854565219 | 1.7361940871  |
| H  | -6.1879214992 | -2.0401062373 | -.4456310379  |
| H  | -5.0281876904 | -1.3899467443 | -2.5324310604 |
| H  | -2.3608712977 | .9934421089   | 2.1197539559  |
| H  | -1.9990493994 | -.6478057158  | 3.9610193347  |
| H  | -1.5163703042 | -1.2899186675 | 2.3868669631  |
| H  | -3.0458222651 | -1.8107674555 | 3.1297895395  |
| H  | -3.7549349058 | 1.1800876722  | 4.1132227061  |
| H  | -4.9369728949 | .0323858555   | 3.4828457399  |
| H  | -4.7379463002 | 1.6056167207  | 2.7021725711  |
| H  | -1.9366175080 | .7446787759   | -2.6020236286 |
| H  | -3.1679366696 | 1.2095195213  | -4.6898686218 |
| H  | -4.1099160278 | 1.7821519514  | -3.3032327613 |
| H  | -4.5633902722 | .2840731094   | -4.1249645751 |
| H  | -1.6978834945 | -.8523893479  | -4.4968391852 |
| H  | -3.0031827440 | -1.8507279722 | -3.8396329940 |
| H  | -1.4865794347 | -1.6640617051 | -2.9403113560 |
| N  | .4333178009   | -2.1715441708 | -.7183692543  |
| N  | 1.6521610542  | -3.8573725726 | -1.3668902419 |
| N  | 1.5845218570  | -2.5209324191 | -1.2213516414 |
| N  | -.2783865948  | -3.3098306380 | -.5256259946  |
| N  | 1.3158900539  | 1.1696534707  | .0523967437   |
| N  | -1.7062140192 | .8131896936   | -.2277365972  |
| Cu | -.0391236464  | -.2304943631  | -.3269840552  |

87.  $L^1CuXO_2$   $\eta^1$  singlet, X = N-methyltetrazole

|   |               |               |               |
|---|---------------|---------------|---------------|
| C | .6446771964   | -3.9449435062 | -.8513010441  |
| C | -1.9555406314 | -.4260083754  | -3.5071108024 |
| C | 3.5370446346  | 1.8486676717  | 3.4387565693  |
| C | 1.8924751376  | 4.1384638960  | .1062320306   |
| C | .8402163700   | 3.0446564503  | .1684761747   |
| C | -.5037738311  | 3.4740008766  | .1771913865   |
| C | -1.6949170197 | 2.7263578834  | .0803498471   |
| C | -2.9591802480 | 3.5542028993  | -.1063267979  |
| C | 2.5723219320  | 1.3726507824  | -.0165742021  |
| C | 3.3328457780  | .9095847776   | 1.0876770940  |
| C | 4.6410906531  | .4713237158   | .8614536956   |
| C | -5.2245839808 | -.9148182410  | -.6018787623  |
| C | 5.1935565801  | .4685069780   | -.4144790083  |
| C | 2.7683608941  | -.5441574426  | 3.0915749502  |
| C | 4.4324691849  | .9079894438   | -1.4928326076 |
| C | 3.1213371056  | 1.3629812104  | -1.3252530107 |
| C | 2.7759810017  | .8831569967   | 2.5094092794  |
| C | 2.3181135981  | 1.7742776666  | -2.5583110931 |
| C | 2.0018837233  | .5509480501   | -3.4424719984 |
| C | 3.0259694814  | 2.8635366587  | -3.3874073917 |
| C | -2.9533896807 | .6529758757   | -.1061582931  |
| C | -3.7657664732 | .2280757311   | .9807523839   |
| C | -4.4221607224 | -.4917156531  | -1.6587183705 |
| C | -4.8925729705 | -.5557535684  | .7004705654   |
| C | -1.7619398972 | -3.1902601216 | -.5649513631  |
| C | -3.2773452443 | .2823132550   | -1.4402680397 |
| C | -3.4873087652 | .6521228157   | 2.4215867992  |
| C | -3.5876854044 | -.5089907777  | 3.4277888346  |
| C | -4.4321850299 | 1.7967029285  | 2.8479540280  |
| C | -2.4482058812 | .7462791968   | -2.6379356773 |
| C | -3.2301473231 | 1.7600400478  | -3.4985333406 |
| H | -2.0481797002 | -2.9249067985 | .4528136148   |
| H | -2.2819165982 | -2.5429730928 | -1.2709512698 |
| H | -2.0057643639 | -4.2332378675 | -.7725156115  |
| H | .4661540513   | -5.0086689230 | -.8906495913  |

|    |               |               |               |
|----|---------------|---------------|---------------|
| H  | 1.4963308140  | 5.0723045879  | .5105353453   |
| H  | 2.1993671526  | 4.3259965886  | -.9279196071  |
| H  | 2.7878584409  | 3.8576794712  | .6653640450   |
| H  | -.6434081476  | 4.5491352695  | .1756414953   |
| H  | -3.0694626386 | 4.2559654160  | .7266897628   |
| H  | -3.8565752842 | 2.9397519443  | -.1667353867  |
| H  | -2.8818257740 | 4.1503056649  | -1.0215282073 |
| H  | 5.2355906720  | .1216046064   | 1.7011019975  |
| H  | 6.2097267262  | .1167113815   | -.5698863627  |
| H  | 4.8628767264  | .8855262173   | -2.4902876641 |
| H  | 1.7386611375  | 1.2274554072  | 2.4698702307  |
| H  | 3.0921097922  | 1.8479388312  | 4.4403879771  |
| H  | 3.5115746500  | 2.8753922866  | 3.0587036567  |
| H  | 4.5886231009  | 1.5585548489  | 3.5426553471  |
| H  | 2.2934099937  | -.5519478441  | 4.0789944062  |
| H  | 3.7855129258  | -.9339535600  | 3.2091144758  |
| H  | 2.2182876874  | -1.2338136025 | 2.4459669941  |
| H  | 1.3617236165  | 2.1831603814  | -2.2212528966 |
| H  | 1.3795715894  | .8447120948   | -4.2963513795 |
| H  | 1.4767535836  | -.2203834622  | -2.8749292750 |
| H  | 2.9201926948  | .1024765459   | -3.8380677538 |
| H  | 2.3811151298  | 3.1981503119  | -4.2077740378 |
| H  | 3.9541187692  | 2.4908012327  | -3.8343787238 |
| H  | 3.2834375376  | 3.7380560716  | -2.7813676854 |
| H  | -5.5267457971 | -.8806094217  | 1.5197783447  |
| H  | -6.1099988382 | -1.5148929234 | -.7941841287  |
| H  | -4.6945093447 | -.7613525674  | -2.6758445154 |
| H  | -2.4625096414 | 1.0300430482  | 2.4642085835  |
| H  | -3.3047777588 | -.1551645022  | 4.4251932886  |
| H  | -2.9166355013 | -1.3276838580 | 3.1590921818  |
| H  | -4.6098261655 | -.8979452156  | 3.5037861716  |
| H  | -4.1957804952 | 2.1246991787  | 3.8663478343  |
| H  | -5.4768909872 | 1.4648135393  | 2.8376940208  |
| H  | -4.3531096446 | 2.6645881125  | 2.1880528298  |
| H  | -1.5612537835 | 1.2532972373  | -2.2510253890 |
| H  | -2.5992625112 | 2.1434503944  | -4.3082772509 |
| H  | -3.5745082204 | 2.6125119409  | -2.9055395233 |
| H  | -4.1123505248 | 1.2971913438  | -3.9554478152 |
| H  | -1.3601794879 | -.0515796253  | -4.3469938687 |
| H  | -2.7871625852 | -1.0032212231 | -3.9271271227 |
| H  | -1.3203930555 | -1.1049606027 | -2.9312412530 |
| N  | .2740369234   | -1.8104883504 | -.7050891366  |
| N  | 1.8167225472  | -3.3428930908 | -.9286788452  |
| N  | -.3225630618  | -3.0224532878 | -.7160834520  |
| N  | 1.5490814651  | -2.0201728152 | -.8381406830  |
| N  | 1.2165342881  | 1.7691672896  | .1963369350   |
| N  | -1.7610030234 | 1.3976399050  | .1221464592   |
| O  | -.4959801000  | -.6917777501  | 2.0910309267  |
| O  | -.9346992493  | -1.8966660320 | 2.0852387869  |
| Cu | -.1301989157  | .4192022421   | .6310944758   |

88.  $L^1CuXO_2$   $\eta^1$  triplet, X = N-methyltetrazole

|   |               |               |               |
|---|---------------|---------------|---------------|
| C | .7563356361   | -3.9147060885 | -.9491117294  |
| C | -5.1700279445 | -.9148637104  | -.7384671100  |
| C | -4.2941454857 | -.5638587510  | -1.7615063071 |
| C | -3.1279396405 | .1676480853   | -1.5041173717 |
| C | -3.4854765403 | .6208536151   | 2.3337636901  |
| C | -3.6813536294 | -.5331270221  | 3.3346953642  |
| C | -4.3765454386 | 1.8151767903  | 2.7331922710  |
| C | -2.2106255650 | .5435015099   | -2.6687361796 |
| C | -2.8991847716 | 1.5354017332  | -3.6280394481 |
| C | -1.7128685987 | -.6891171501  | -3.4480746482 |
| C | 3.7289039562  | 1.7084941272  | 3.4182331464  |

|   |               |               |               |
|---|---------------|---------------|---------------|
| C | 2.0815674847  | 3.9065833308  | .3422050816   |
| C | 1.0245664640  | 2.8122551711  | .3271843733   |
| C | -.3102396155  | 3.2681020364  | .3015199725   |
| C | -1.5158431938 | 2.5646050760  | .0991461534   |
| C | -2.7260899578 | 3.4384512053  | -.1983108731  |
| C | 2.7639932198  | 1.1888224726  | .0338480983   |
| C | 3.5962591098  | .7279014310   | 1.0832964315  |
| C | 4.9203755352  | .3834424505   | .7885833521   |
| C | 5.4222910279  | .4669811662   | -.5047051820  |
| C | 3.3607631944  | -.7797205569  | 3.1150444555  |
| C | 4.5909244593  | .8972825210   | -1.5330019332 |
| C | 3.2624775648  | 1.2632305330  | -1.2946759860 |
| C | 3.1044513911  | .6191471230   | 2.5235775185  |
| C | 2.3966900214  | 1.6833561805  | -2.4842674463 |
| C | 2.1386400776  | .4936272073   | -3.4304279194 |
| C | 3.0054237316  | 2.8577280753  | -3.2763556339 |
| C | -2.8507757954 | .5601648537   | -.1661108312  |
| C | -3.7356378992 | .2009303563   | .8859830746   |
| C | -4.8858394339 | -.5315512396  | .5691050683   |
| H | -1.6148678398 | -3.1234440776 | .9401564362   |
| H | -2.0731215615 | -2.2650084126 | -.5493772762  |
| H | -1.8909748632 | -4.0383661444 | -.5764313469  |
| H | .4974262151   | -4.9498881374 | -1.1119591718 |
| C | -1.5145799158 | -3.1097635995 | -.1451962258  |
| H | 1.6815766303  | 4.8119600016  | .8041783414   |
| H | 2.3909203190  | 4.1635889246  | -.6760887042  |
| H | 2.9768101213  | 3.5950788326  | .8831847257   |
| H | -.4209271521  | 4.3463774431  | .3299470195   |
| H | -2.7743214361 | 4.2704509357  | .5101873206   |
| H | -3.6639992372 | 2.8853882646  | -.1586339147  |
| H | -2.6291938688 | 3.8740199342  | -1.1991733040 |
| H | 5.5699182619  | .0427161812   | 1.5901191669  |
| H | 6.4528419814  | .1917572635   | -.7123219549  |
| H | 4.9803474290  | .9445220920   | -2.5466524787 |
| H | 2.0228404044  | .7769798972   | 2.5186807980  |
| H | 3.3480212761  | 1.6318277378  | 4.4432466602  |
| H | 3.5000697514  | 2.7137685965  | 3.0497714567  |
| H | 4.8199986227  | 1.6100300162  | 3.4589635981  |
| H | 2.9063123017  | -.8609029988  | 4.1085063936  |
| H | 4.4313507572  | -.9863285589  | 3.2238259180  |
| H | 2.9290971879  | -1.5595674537 | 2.4819411604  |
| H | 1.4263376863  | 2.0102035665  | -2.1014045930 |
| H | 1.4744544269  | .7916717970   | -4.2509086674 |
| H | 1.6825197155  | -.3434108738  | -2.8977353375 |
| H | 3.0729079144  | .1322025158   | -3.8747355176 |
| H | 2.3144757913  | 3.1867433170  | -4.0609880434 |
| H | 3.9421467012  | 2.5707113795  | -3.7668400524 |
| H | 3.2220130098  | 3.7183382249  | -2.6360733548 |
| H | -5.5738361732 | -.8055083030  | 1.3637072383  |
| H | -6.0709499108 | -1.4810291546 | -.9591981046  |
| H | -4.5215137687 | -.8585898798  | -2.7828599450 |
| H | -2.4429527869 | .9415690269   | 2.4037070651  |
| H | -3.3715259436 | -.2140568158  | 4.3357576295  |
| H | -3.0805931253 | -1.4028764473 | 3.0601094924  |
| H | -4.7301479462 | -.8433891795  | 3.4047061672  |
| H | -4.1630490214 | 2.1234136960  | 3.7628945261  |
| H | -5.4379092376 | 1.5468015708  | 2.6771718973  |
| H | -4.2174247672 | 2.6804923353  | 2.0845264552  |
| H | -1.3312306004 | 1.0406160259  | -2.2510279928 |
| H | -2.2076901423 | 1.8519207708  | -4.4171221825 |
| H | -3.2441397251 | 2.4300141264  | -3.1012945494 |
| H | -3.7705124183 | 1.0800956466  | -4.1128081545 |
| H | -1.0307933959 | -.3844795907  | -4.2489889249 |
| H | -2.5389995405 | -1.2408297063 | -3.9108772802 |

Electronic Supplementary Information for Dalton Transactions  
This journal is © The Royal Society of Chemistry 2006

S128

|    |               |               |               |
|----|---------------|---------------|---------------|
| H  | -1.1678058168 | -1.3804237335 | -2.7981622238 |
| N  | .5771077668   | -1.8165941720 | -.4402678350  |
| N  | 1.9405100324  | -3.3632518901 | -1.1459226620 |
| N  | -.1073910912  | -2.9816271661 | -.5143471613  |
| N  | 1.7940642553  | -2.0621234040 | -.8192885471  |
| N  | 1.3963347927  | 1.5308200302  | .3012440918   |
| N  | -1.6294831180 | 1.2401877007  | .1212386064   |
| O  | -.8503487909  | -1.0588960150 | 1.9729733950  |
| O  | .2342641614   | -1.2687143423 | 2.6189203472  |
| Cu | -.0139440136  | .1611072215   | .5624682354   |
